# Supplementary material for: Dynamics of enhancer chromatin signatures mark the transition from pluripotency to cell specification during embryogenesis
Source: HighWire-hosted journal article supplement (doi:10.1101/gr.134833.111), 2012-05-16
Supplement: Sup_tables_S1-S18_Zv8_data.xlsx [file Sup_tables_S1-S18_Zv8_data.xlsx]

## Sheet: Table_S1
Sample	# Mapped reads	# Identified peaks
H3K4me1_dome.bed	7177771	32206
H3K4me1_80%epi.bed	8588448	61771
H3K4me1_24hpf.bed	4682379	67272
H3K4me1_48hpf.bed	5343816	65872
H3K27ac_dome.bed	5946398	40326
H3K27ac_80%epi.bed	5897789	41448
H3K27ac_24hpf.bed	5982109	45979
H3K27ac_48hpf.bed	6747131	52947
H3K4me3_dome.bed	7463928	19110
H3K4me3_80%epi.bed	9633776	22096
H3K4me3_24hpf.bed	7961929	21499
H3K4me3_48hpf.bed	8100002	16095

## Sheet: Table_S2
Dome				80% epiboly				24 hpf				48 hpf
Zv8_NA10078	42669	43854		Zv8_NA1002	6346	6988		Zv8_NA1	1376	1721		Zv8_NA10021	9890	10420
Zv8_NA10146	63850	64831		Zv8_NA10055	1003	1348		Zv8_NA1004	1324	1845		Zv8_NA10053	14538	15039
Zv8_NA10202	1703	3041		Zv8_NA1010	8256	9395		Zv8_NA10044	716	1128		Zv8_NA10078	49957	50457
Zv8_NA10265	839	3502		Zv8_NA1010	9652	10065		Zv8_NA10134	22211	22559		Zv8_NA10078	63273	63889
Zv8_NA10559	1	694		Zv8_NA10115	4054	4811		Zv8_NA1016	64285	64705		Zv8_NA1016	107610	109604
Zv8_NA10840	24955	26495		Zv8_NA10146	30095	30853		Zv8_NA1016	104399	105881		Zv8_NA1016	110876	111503
Zv8_NA1664	55979	57697		Zv8_NA10146	31316	32796		Zv8_NA1016	106687	109535		Zv8_NA1016	120943	121510
Zv8_NA1804	60092	61179		Zv8_NA1016	101501	102717		Zv8_NA1016	110556	111147		Zv8_NA10288	48041	48556
Zv8_NA1944	27063	28347		Zv8_NA1016	104786	105951		Zv8_NA1016	113652	114922		Zv8_NA107	5498	6129
Zv8_NA2078	25321	26321		Zv8_NA1016	107124	109623		Zv8_NA1016	117029	119044		Zv8_NA10703	19335	20303
Zv8_NA2081	74536	76143		Zv8_NA1016	109849	110230		Zv8_NA1016	123156	124200		Zv8_NA10729	21901	23148
Zv8_NA2102	15412	16833		Zv8_NA1016	110656	111414		Zv8_NA1016	134470	136305		Zv8_NA10766	3498	4195
Zv8_NA2181	159	2341		Zv8_NA1016	113606	115188		Zv8_NA10288	47967	48545		Zv8_NA10766	6213	6905
Zv8_NA2250	549	1819		Zv8_NA1016	116915	119191		Zv8_NA10325	28091	28988		Zv8_NA10866	9149	9726
Zv8_NA2254	62734	64859		Zv8_NA1016	120008	121680		Zv8_NA10441	24893	25189		Zv8_NA10866	79678	80305
Zv8_NA2342	23584	25174		Zv8_NA1016	134827	136700		Zv8_NA10536	5342	5730		Zv8_NA110	20686	21181
Zv8_NA2350	99103	100086		Zv8_NA10265	1088	3667		Zv8_NA10691	6713	7816		Zv8_NA11048	27579	28204
Zv8_NA2353	29410	30629		Zv8_NA10288	11871	12379		Zv8_NA107	263	797		Zv8_NA111	16797	17339
Zv8_NA2446	7989	9551		Zv8_NA10288	47971	48578		Zv8_NA107	5397	6092		Zv8_NA111	79259	80201
Zv8_NA2538	75960	77728		Zv8_NA10294	10929	11345		Zv8_NA10716	60958	61376		Zv8_NA11230	35971	36552
Zv8_NA2567	18994	20540		Zv8_NA10325	91	1281		Zv8_NA10729	10509	11336		Zv8_NA11276	46565	47123
Zv8_NA2617	5050	6873		Zv8_NA10335	18188	18687		Zv8_NA10729	13707	14901		Zv8_NA11288	3076	3519
Zv8_NA2627	53003	54152		Zv8_NA10335	22005	22355		Zv8_NA10729	21793	22993		Zv8_NA1134	45066	45478
Zv8_NA2640	1873	4201		Zv8_NA10347	535	1378		Zv8_NA10756	28768	29464		Zv8_NA1134	61071	61692
Zv8_NA2641	212	1461		Zv8_NA10361	43352	43531		Zv8_NA10840	25114	25905		Zv8_NA1134	63629	64279
Zv8_NA2641	53031	55746		Zv8_NA10541	8610	9449		Zv8_NA10840	29462	30510		Zv8_NA11417	214	979
Zv8_NA2663	24539	25812		Zv8_NA10541	82340	83164		Zv8_NA10949	1518	2151		Zv8_NA11417	23254	23763
Zv8_NA2733	90216	92701		Zv8_NA10582	1516	2092		Zv8_NA10953	3005	3412		Zv8_NA11417	40361	41210
Zv8_NA2777	9337	12081		Zv8_NA10595	977	1279		Zv8_NA110	15848	16781		Zv8_NA1177	64104	64654
Zv8_NA2777	15310	20867		Zv8_NA10691	6765	7841		Zv8_NA110	21653	22137		Zv8_NA1227	5268	5744
Zv8_NA2811	9192	10416		Zv8_NA107	5347	6051		Zv8_NA110	22353	22875		Zv8_NA127	104514	105033
Zv8_NA2859	130102	132029		Zv8_NA10704	56642	57384		Zv8_NA110	31243	31965		Zv8_NA1380	144005	144567
Zv8_NA2903	25425	26614		Zv8_NA10716	12506	13074		Zv8_NA110	40999	42166		Zv8_NA1380	336255	336974
Zv8_NA2976	16626	18686		Zv8_NA10716	104924	105388		Zv8_NA110	42689	43104		Zv8_NA1380	342237	342904
Zv8_NA3049	46567	50095		Zv8_NA10729	1468	2616		Zv8_NA110	46069	47206		Zv8_NA1498	58626	59099
Zv8_NA3075	28	3754		Zv8_NA10729	8053	8690		Zv8_NA11048	27413	28817		Zv8_NA153	6389	7077
Zv8_NA3126	132330	133935		Zv8_NA10729	10090	11517		Zv8_NA11066	1461	1867		Zv8_NA1548	15706	16514
Zv8_NA3176	24973	26271		Zv8_NA10729	13796	14568		Zv8_NA11071	23289	23736		Zv8_NA1548	35983	36628
Zv8_NA3183	2579	3784		Zv8_NA10729	19479	20623		Zv8_NA11172	9447	10051		Zv8_NA1548	50049	50883
Zv8_NA3266	186468	187434		Zv8_NA10729	21818	23150		Zv8_NA11329	35348	36042		Zv8_NA1605	19258	20224
Zv8_NA3322	44090	45690		Zv8_NA10741	16966	20209		Zv8_NA1134	9811	10496		Zv8_NA1615	34176	34725
Zv8_NA3343	39719	40597		Zv8_NA10741	22397	24427		Zv8_NA1134	27827	28234		Zv8_NA1618	62150	62765
Zv8_NA3399	16740	18724		Zv8_NA10766	14413	15516		Zv8_NA1134	31718	32813		Zv8_NA1642	58171	58664
Zv8_NA3604	91297	92747		Zv8_NA1077	0	395		Zv8_NA1134	34282	35306		Zv8_NA1659	15775	16318
Zv8_NA3610	68401	70246		Zv8_NA1082	10374	11047		Zv8_NA1134	39980	41580		Zv8_NA1664	99949	100503
Zv8_NA3665	5061	7392		Zv8_NA1083	5087	6314		Zv8_NA1134	44724	45487		Zv8_NA1691	68939	69918
Zv8_NA3751	12584	14490		Zv8_NA10840	24991	26271		Zv8_NA1134	60673	61582		Zv8_NA1715	38565	39474
Zv8_NA3752	33183	36293		Zv8_NA10918	201	689		Zv8_NA11417	236	1162		Zv8_NA1715	40575	41149
Zv8_NA3757	12046	14098		Zv8_NA10936	6166	7390		Zv8_NA11417	20152	21272		Zv8_NA172	2899	3838
Zv8_NA3782	85736	87796		Zv8_NA110	42503	42865		Zv8_NA11417	23222	24291		Zv8_NA1731	643	1160
Zv8_NA3790	38963	41023		Zv8_NA11172	16832	17283		Zv8_NA11417	150078	150911		Zv8_NA1784	10440	11120
Zv8_NA3883	112848	115879		Zv8_NA11191	363	813		Zv8_NA1177	63966	65302		Zv8_NA1784	16822	17432
Zv8_NA3899	88795	89966		Zv8_NA11191	2361	2920		Zv8_NA123	60299	60822		Zv8_NA1795	10806	11691
Zv8_NA3899	147442	148755		Zv8_NA11191	4703	5209		Zv8_NA127	25461	26361		Zv8_NA1865	17084	17747
Zv8_NA3899	152519	154190		Zv8_NA11192	1814	2548		Zv8_NA127	58820	59142		Zv8_NA1938	28240	28740
Zv8_NA3975	44984	46408		Zv8_NA11252	9067	9483		Zv8_NA127	80189	80762		Zv8_NA1938	33090	33651
Zv8_NA3984	103367	105389		Zv8_NA11308	8358	9365		Zv8_NA127	82993	83363		Zv8_NA1944	7869	8593
Zv8_NA4006	48527	50564		Zv8_NA11329	60860	62001		Zv8_NA127	84601	85574		Zv8_NA1958	60352	60841
Zv8_NA4056	68027	69274		Zv8_NA11329	67285	68225		Zv8_NA127	94772	95328		Zv8_NA1958	82411	82852
Zv8_NA4224	20546	23230		Zv8_NA1134	58772	59284		Zv8_NA127	104504	104989		Zv8_NA1965	53941	54528
Zv8_NA4258	3736	5437		Zv8_NA1134	60548	61922		Zv8_NA127	108460	108914		Zv8_NA1965	55945	56494
Zv8_NA4282	127978	129502		Zv8_NA11417	138	905		Zv8_NA1282	7722	8365		Zv8_NA1968	44104	44857
Zv8_NA4284	8116	9067		Zv8_NA11417	13327	14308		Zv8_NA1294	629	1209		Zv8_NA1980	15061	16326
Zv8_NA4286	14212	15672		Zv8_NA11417	23633	24165		Zv8_NA1318	298	871		Zv8_NA1980	23990	24495
Zv8_NA4286	74653	76994		Zv8_NA11417	33807	34348		Zv8_NA1334	1840	2420		Zv8_NA1980	62622	63583
Zv8_NA4338	33236	34289		Zv8_NA11417	36524	37336		Zv8_NA1334	10704	11569		Zv8_NA1980	104787	105272
Zv8_NA4370	94683	96398		Zv8_NA11417	38895	41103		Zv8_NA1380	119345	121247		Zv8_NA1981	32207	32784
Zv8_NA4460	24208	25121		Zv8_NA11417	190686	191321		Zv8_NA1380	125878	126524		Zv8_NA1981	37993	38558
Zv8_NA4490	35778	37852		Zv8_NA1166	1364	1758		Zv8_NA1380	130992	131687		Zv8_NA2003	36321	37267
Zv8_NA4490	52822	54080		Zv8_NA1166	7917	8228		Zv8_NA1380	147070	147521		Zv8_NA2004	30589	31152
Zv8_NA4688	67098	68370		Zv8_NA1177	50467	51413		Zv8_NA1380	162166	162514		Zv8_NA201	21658	22471
Zv8_NA4819	288549	290188		Zv8_NA1177	63974	64687		Zv8_NA1380	234328	234819		Zv8_NA2017	55802	56469
Zv8_NA4897	11937	14213		Zv8_NA123	75058	75363		Zv8_NA1400	14966	15415		Zv8_NA2017	116857	117345
Zv8_NA513	113760	115204		Zv8_NA123	81774	82172		Zv8_NA1434	8007	9152		Zv8_NA2037	54562	55239
Zv8_NA5469	10519	11851		Zv8_NA1233	1624	2334		Zv8_NA1498	58570	58887		Zv8_NA2047	11673	12248
Zv8_NA594	20172	21693		Zv8_NA1251	24224	25021		Zv8_NA151	4885	5842		Zv8_NA2060	122372	122923
Zv8_NA5994	17527	19056		Zv8_NA127	80373	80816		Zv8_NA1548	15111	16341		Zv8_NA2062	39351	39948
Zv8_NA6036	237489	238722		Zv8_NA127	94591	95544		Zv8_NA1548	27201	27972		Zv8_NA2076	6398	6763
Zv8_NA6036	261465	262493		Zv8_NA127	97187	97896		Zv8_NA1548	38180	38805		Zv8_NA2078	16803	17331
Zv8_NA6036	345544	346889		Zv8_NA127	104283	105326		Zv8_NA1548	76916	78337		Zv8_NA2081	27484	28357
Zv8_NA6114	30917	33033		Zv8_NA1282	7697	8843		Zv8_NA1605	19269	20046		Zv8_NA2081	33358	33928
Zv8_NA6934	1206	2833		Zv8_NA1282	12379	12971		Zv8_NA1605	22817	23259		Zv8_NA2081	61499	62070
Zv8_NA7265	1618	2403		Zv8_NA1363	6150	6533		Zv8_NA1618	62270	62560		Zv8_NA2082	3660	4136
Zv8_NA7513	72073	76089		Zv8_NA1380	205686	206100		Zv8_NA1642	135110	135411		Zv8_NA2096	30500	31097
Zv8_NA7513	76769	79502		Zv8_NA1380	365732	366172		Zv8_NA1691	68927	69873		Zv8_NA2096	47494	48044
Zv8_NA7849	4442	6339		Zv8_NA1445	696	1094		Zv8_NA1709	11424	12102		Zv8_NA2100	9033	9719
Zv8_NA7856	2167	3098		Zv8_NA151	4633	5982		Zv8_NA1709	14953	15682		Zv8_NA2102	76518	77046
Zv8_NA8333	18524	19891		Zv8_NA1532	842	1114		Zv8_NA1715	32133	33362		Zv8_NA2105	3371	3932
Zv8_NA8350	17584	19393		Zv8_NA1533	11668	12584		Zv8_NA1715	34658	35645		Zv8_NA2105	46944	47437
Zv8_NA8543	18	1473		Zv8_NA1533	17153	17966		Zv8_NA1715	37636	37957		Zv8_NA2105	53133	53655
Zv8_NA8567	24	1135		Zv8_NA1538	29075	29431		Zv8_NA1715	38528	39442		Zv8_NA2105	54884	55460
Zv8_NA8666	1334	2633		Zv8_NA1548	27193	28372		Zv8_NA1715	40685	41213		Zv8_NA2105	220391	220890
Zv8_NA8792	24466	26062		Zv8_NA1548	52974	53459		Zv8_NA1841	4064	4369		Zv8_NA2110	33679	34239
Zv8_NA8830	134106	135752		Zv8_NA1557	332	695		Zv8_NA1912	5959	6458		Zv8_NA2110	35818	36516
Zv8_NA8830	144555	145875		Zv8_NA1571	4531	4781		Zv8_NA1944	3260	3734		Zv8_NA2110	63457	64014
Zv8_NA9839	38279	39579		Zv8_NA160	90559	92039		Zv8_NA1958	132330	132719		Zv8_NA2116	4175	4795
Zv8_scaffold2960	38592	40865		Zv8_NA1605	3420	4346		Zv8_NA1962	167	825		Zv8_NA2129	1656	2531
Zv8_scaffold2960	57709	59154		Zv8_NA1642	40175	40835		Zv8_NA1968	101160	101384		Zv8_NA2129	50399	51175
Zv8_scaffold2960	59991	62264		Zv8_NA1642	41640	42417		Zv8_NA198	25082	25534		Zv8_NA2150	8649	9207
Zv8_scaffold2972	20709	23290		Zv8_NA1654	1862	2273		Zv8_NA1980	15007	16261		Zv8_NA2153	2145	2982
Zv8_scaffold2977	32753	35008		Zv8_NA1664	52878	53956		Zv8_NA1981	31960	32610		Zv8_NA2153	34127	34650
Zv8_scaffold2998	109005	112345		Zv8_NA1664	55682	57345		Zv8_NA1985	100178	100566		Zv8_NA2167	2162	2557
Zv8_scaffold2998	122337	124414		Zv8_NA1664	62666	63390		Zv8_NA1985	113827	114226		Zv8_NA2171	13056	13814
Zv8_scaffold3011	31619	35451		Zv8_NA1664	73054	73865		Zv8_NA2003	3112	3532		Zv8_NA2171	15110	15720
Zv8_scaffold3013	74364	76448		Zv8_NA1676	3840	4925		Zv8_NA2003	15402	15693		Zv8_NA2189	19015	19597
Zv8_scaffold3021	246092	248238		Zv8_NA1676	10203	10585		Zv8_NA2003	31821	32176		Zv8_NA2189	81474	82416
Zv8_scaffold3025	42385	44376		Zv8_NA170	2920	3551		Zv8_NA2003	44756	45380		Zv8_NA2196	70349	71395
Zv8_scaffold3025	226972	229560		Zv8_NA1715	28814	30909		Zv8_NA2004	1065	1539		Zv8_NA2197	1	701
Zv8_scaffold3025	233724	237312		Zv8_NA1715	35097	35833		Zv8_NA2010	6065	6327		Zv8_NA2201	17861	18380
Zv8_scaffold3025	597108	601666		Zv8_NA1715	37490	39477		Zv8_NA2017	130715	131226		Zv8_NA2213	36147	36764
Zv8_scaffold3025	635722	638198		Zv8_NA1715	40450	41342		Zv8_NA2039	61118	61423		Zv8_NA2213	90061	90722
Zv8_scaffold3027	219637	221321		Zv8_NA1725	13975	14294		Zv8_NA2043	1437	1825		Zv8_NA2213	138090	138651
Zv8_scaffold3028	120239	121701		Zv8_NA1731	635	983		Zv8_NA2043	2032	2722		Zv8_NA2213	188786	189390
Zv8_scaffold3032	89923	91352		Zv8_NA179	3379	4502		Zv8_NA2047	4188	4799		Zv8_NA2248	47427	47961
Zv8_scaffold3041	453738	455094		Zv8_NA179	4925	5754		Zv8_NA2047	9842	10342		Zv8_NA2251	13056	13610
Zv8_scaffold3045	88109	90427		Zv8_NA1804	60474	60910		Zv8_NA2047	11752	12220		Zv8_NA2254	29351	30289
Zv8_scaffold3088	95118	96897		Zv8_NA1819	1108	1416		Zv8_NA2081	27361	28038		Zv8_NA2260	4002	4766
Zv8_scaffold3091	250845	253985		Zv8_NA1909	10824	11213		Zv8_NA2081	82992	83707		Zv8_NA2269	35432	35992
Zv8_scaffold3105	101458	103945		Zv8_NA1912	17930	19113		Zv8_NA2081	89377	90280		Zv8_NA2271	59685	60204
Zv8_scaffold3107	143992	146166		Zv8_NA1933	38403	39128		Zv8_NA2085	748	1157		Zv8_NA2278	37455	38020
Zv8_scaffold3108	253280	254735		Zv8_NA1940	563	1253		Zv8_NA2091	116426	116802		Zv8_NA2279	7478	8191
Zv8_scaffold3112	183561	185125		Zv8_NA1943	1278	1751		Zv8_NA2102	15204	16869		Zv8_NA229	8648	9175
Zv8_scaffold3115	7121	8487		Zv8_NA1944	27043	27741		Zv8_NA2105	128253	128670		Zv8_NA2295	607	1132
Zv8_scaffold3119	59558	63725		Zv8_NA1944	43192	43427		Zv8_NA2110	30725	31148		Zv8_NA2295	93247	94018
Zv8_scaffold3125	13825	14851		Zv8_NA1946	17797	18518		Zv8_NA2110	65830	66355		Zv8_NA2320	47228	47990
Zv8_scaffold3127	128663	132580		Zv8_NA1956	6330	6909		Zv8_NA2110	80402	80865		Zv8_NA2321	36148	36974
chr1	1232513	1234665		Zv8_NA1958	84403	85189		Zv8_NA2129	50307	50868		Zv8_NA2324	83755	84382
chr1	3973493	3975175		Zv8_NA1958	156693	157522		Zv8_NA2150	8480	8938		Zv8_NA2338	2483	3140
chr1	4732254	4734156		Zv8_NA1962	296	1598		Zv8_NA2153	11633	12931		Zv8_NA2342	24624	25267
chr1	4946922	4949353		Zv8_NA1965	51163	51813		Zv8_NA2168	13532	14630		Zv8_NA2342	42471	43114
chr1	6220785	6222017		Zv8_NA1978	67655	68450		Zv8_NA2171	15595	16051		Zv8_NA2353	40200	40743
chr1	9695923	9698179		Zv8_NA198	1002	1809		Zv8_NA2186	9339	9805		Zv8_NA2361	24702	25219
chr1	10299260	10301648		Zv8_NA1980	79689	80954		Zv8_NA2186	20245	20948		Zv8_NA2365	7790	8283
chr1	14046973	14048130		Zv8_NA1980	104680	105802		Zv8_NA2186	118206	118873		Zv8_NA2365	55983	56497
chr1	15077566	15079202		Zv8_NA1981	22446	22886		Zv8_NA2196	57447	58459		Zv8_NA2367	2822	3323
chr1	16168349	16173569		Zv8_NA1981	32062	32781		Zv8_NA2197	1	706		Zv8_NA2373	6179	6631
chr1	16714288	16716805		Zv8_NA1985	99925	101173		Zv8_NA2197	10967	11378		Zv8_NA2392	16850	17570
chr1	16793451	16795768		Zv8_NA2003	12720	13641		Zv8_NA2200	4675	5709		Zv8_NA2393	840	1352
chr1	17791577	17793228		Zv8_NA2010	3570	4156		Zv8_NA2200	6459	7142		Zv8_NA2409	3189	3833
chr1	17793285	17795505		Zv8_NA2010	4438	5051		Zv8_NA2234	902	1343		Zv8_NA2455	565	1044
chr1	18051779	18054339		Zv8_NA2013	2593	3344		Zv8_NA2242	61319	61644		Zv8_NA2475	5083	5570
chr1	18583109	18585388		Zv8_NA2017	79087	81618		Zv8_NA2242	65413	65875		Zv8_NA2477	49461	50003
chr1	18679784	18681155		Zv8_NA2017	83210	84341		Zv8_NA2254	8875	9493		Zv8_NA2485	3045	3593
chr1	19086901	19092545		Zv8_NA2017	86335	87957		Zv8_NA2254	32219	33425		Zv8_NA2485	3758	4543
chr1	19111072	19113699		Zv8_NA2017	89351	90662		Zv8_NA2274	53836	55270		Zv8_NA2486	683	1483
chr1	19758814	19762010		Zv8_NA2017	93302	93968		Zv8_NA2278	13598	13937		Zv8_NA2494	9938	10455
chr1	20113227	20114433		Zv8_NA2017	96251	96960		Zv8_NA2278	63937	64482		Zv8_NA2514	5024	5899
chr1	20762475	20763698		Zv8_NA2017	131648	132079		Zv8_NA2283	43742	44110		Zv8_NA2514	7977	8685
chr1	20831536	20834585		Zv8_NA2020	45940	46545		Zv8_NA2308	4525	4916		Zv8_NA2514	18289	18840
chr1	22206333	22210100		Zv8_NA2020	89749	90141		Zv8_NA2321	36553	36994		Zv8_NA2517	5370	5794
chr1	22294521	22296767		Zv8_NA2020	92681	93027		Zv8_NA2324	50806	51329		Zv8_NA2543	11694	12426
chr1	22407461	22409530		Zv8_NA2020	93384	93692		Zv8_NA2324	98882	99415		Zv8_NA2543	31986	32541
chr1	23751124	23753184		Zv8_NA2032	58515	59536		Zv8_NA2329	4132	4908		Zv8_NA2543	55635	56140
chr1	24524910	24527289		Zv8_NA2039	25204	25638		Zv8_NA2329	6785	7536		Zv8_NA2543	70353	70916
chr1	25262221	25264165		Zv8_NA2039	60690	61866		Zv8_NA2329	9893	10934		Zv8_NA2545	124360	125044
chr1	28814050	28815881		Zv8_NA2042	13919	14523		Zv8_NA2338	2566	3029		Zv8_NA2554	4959	5639
chr1	29402924	29404921		Zv8_NA2042	15803	16152		Zv8_NA2339	26322	26932		Zv8_NA2576	23162	23757
chr1	29443261	29448234		Zv8_NA205	6936	7546		Zv8_NA2341	24547	24963		Zv8_NA2576	27063	27501
chr1	29516030	29518938		Zv8_NA2051	18023	18551		Zv8_NA2342	22583	23016		Zv8_NA2594	50947	51442
chr1	31173273	31174859		Zv8_NA2060	41591	42075		Zv8_NA2362	620	1010		Zv8_NA2595	70371	70883
chr1	34446777	34448626		Zv8_NA2062	39593	39965		Zv8_NA2363	95847	96354		Zv8_NA2599	765	1790
chr1	35792304	35793756		Zv8_NA2071	30091	30472		Zv8_NA2365	32835	33243		Zv8_NA2621	39173	39736
chr1	35795069	35797034		Zv8_NA2074	1429	2359		Zv8_NA237	571	1433		Zv8_NA2623	82889	83743
chr1	37608380	37611195		Zv8_NA2081	27286	28258		Zv8_NA2392	20995	21430		Zv8_NA2623	118714	119271
chr1	38141389	38142849		Zv8_NA2081	33105	34224		Zv8_NA2393	757	1118		Zv8_NA2623	151121	152227
chr1	38184321	38187521		Zv8_NA2081	35192	35806		Zv8_NA2416	1	1157		Zv8_NA2623	159832	160580
chr1	38495603	38499054		Zv8_NA2081	45049	45589		Zv8_NA2424	257	636		Zv8_NA2623	192101	192777
chr1	39078920	39080906		Zv8_NA2081	67049	67812		Zv8_NA2425	9266	9893		Zv8_NA2626	60062	60718
chr1	39198631	39200376		Zv8_NA2081	74931	75863		Zv8_NA2425	12964	13730		Zv8_NA2627	9241	9996
chr1	39605227	39608295		Zv8_NA2081	82419	83719		Zv8_NA2444	22922	23342		Zv8_NA2639	33340	34063
chr1	40113419	40115957		Zv8_NA2081	89225	90695		Zv8_NA2463	18981	19473		Zv8_NA2641	54198	54751
chr1	40314618	40316679		Zv8_NA2081	92510	93258		Zv8_NA2477	64402	65269		Zv8_NA2659	37049	37604
chr1	40569200	40574849		Zv8_NA2096	43352	44246		Zv8_NA2486	421	1404		Zv8_NA2663	6580	7287
chr1	40935410	40937620		Zv8_NA2096	44941	45456		Zv8_NA2494	24042	24545		Zv8_NA2665	71895	72886
chr1	42387262	42388656		Zv8_NA2096	51030	52248		Zv8_NA2514	4703	5486		Zv8_NA2671	1275	1991
chr1	43116665	43119521		Zv8_NA2096	102145	102698		Zv8_NA2514	7667	8490		Zv8_NA2679	17744	18311
chr1	43988059	43989563		Zv8_NA2102	6413	7076		Zv8_NA2543	7942	8321		Zv8_NA2689	3499	4122
chr1	44578053	44580984		Zv8_NA2102	15147	16506		Zv8_NA2543	31807	32430		Zv8_NA2696	32636	33107
chr1	44759892	44762143		Zv8_NA2105	54606	55771		Zv8_NA2543	46322	47532		Zv8_NA2701	32955	33477
chr1	45844452	45848845		Zv8_NA2105	89341	90689		Zv8_NA2543	70112	70843		Zv8_NA2706	69910	70780
chr1	46082203	46084350		Zv8_NA2105	157868	159686		Zv8_NA2545	4755	5127		Zv8_NA2708	17920	18581
chr1	47513444	47515992		Zv8_NA2106	16279	17477		Zv8_NA2554	5021	5361		Zv8_NA2718	23498	24203
chr1	47518163	47519505		Zv8_NA2116	13861	14526		Zv8_NA2578	5282	5783		Zv8_NA2722	26009	26559
chr1	48750934	48752468		Zv8_NA2120	37072	38084		Zv8_NA2595	134638	135637		Zv8_NA2727	9362	9887
chr1	48753901	48755724		Zv8_NA2129	29480	29974		Zv8_NA2595	210620	211027		Zv8_NA2729	58563	59194
chr1	49320725	49321861		Zv8_NA2129	50358	51020		Zv8_NA2599	559	1612		Zv8_NA2733	3314	4020
chr1	49327422	49329215		Zv8_NA2132	21247	22573		Zv8_NA2599	8897	9763		Zv8_NA2733	6387	7115
chr1	49329386	49331821		Zv8_NA2150	8540	9149		Zv8_NA2623	100520	101169		Zv8_NA2733	38894	39403
chr1	49794119	49796034		Zv8_NA2181	847	1511		Zv8_NA2627	30347	30719		Zv8_NA2733	44004	44701
chr1	50182602	50184248		Zv8_NA2189	81569	82200		Zv8_NA2639	35597	36122		Zv8_NA2733	119458	120057
chr1	50854704	50857682		Zv8_NA2189	115974	116649		Zv8_NA2641	54361	55070		Zv8_NA2733	126814	127324
chr1	51426002	51427809		Zv8_NA2196	57121	59091		Zv8_NA2654	77057	77658		Zv8_NA2738	884	1332
chr1	53536193	53537993		Zv8_NA2196	92298	94154		Zv8_NA2654	79992	80541		Zv8_NA2738	4179	5012
chr1	54158995	54160235		Zv8_NA2196	94364	94732		Zv8_NA2706	3920	4365		Zv8_NA2744	1897	3094
chr1	54285657	54287424		Zv8_NA2197	0	321		Zv8_NA2706	26553	27326		Zv8_NA2749	27568	28126
chr10	3000601	3002662		Zv8_NA2203	11483	11840		Zv8_NA2708	2992	3380		Zv8_NA2750	3399	4318
chr10	4838467	4839711		Zv8_NA2213	105770	106108		Zv8_NA2708	5177	5361		Zv8_NA2750	10397	10882
chr10	5711959	5713745		Zv8_NA2213	148377	149621		Zv8_NA2721	2311	2934		Zv8_NA2750	43869	44655
chr10	5944525	5946739		Zv8_NA2229	16824	17269		Zv8_NA2726	2506	2797		Zv8_NA2760	2071	2922
chr10	7551413	7553506		Zv8_NA2248	24811	25861		Zv8_NA2727	12234	12781		Zv8_NA2760	6024	7125
chr10	7835064	7836930		Zv8_NA2250	27236	27767		Zv8_NA2732	82522	82754		Zv8_NA2760	9448	10754
chr10	8977738	8980888		Zv8_NA2250	28531	29001		Zv8_NA2733	57175	58072		Zv8_NA2766	77443	77915
chr10	9082811	9085746		Zv8_NA2254	29387	30432		Zv8_NA2733	62706	63415		Zv8_NA2776	26607	27134
chr10	9468316	9469967		Zv8_NA2254	35825	36242		Zv8_NA2733	90947	92276		Zv8_NA2776	37787	38225
chr10	10052222	10054298		Zv8_NA2257	1995	2617		Zv8_NA2733	106671	107716		Zv8_NA2777	15793	16664
chr10	10097967	10099352		Zv8_NA2260	3887	4811		Zv8_NA2733	123403	123960		Zv8_NA2777	18542	19050
chr10	10907746	10909606		Zv8_NA2260	11110	11578		Zv8_NA2733	128838	129519		Zv8_NA2777	20288	20921
chr10	11064092	11065735		Zv8_NA2262	735	1498		Zv8_NA2748	17192	17559		Zv8_NA2777	24643	25251
chr10	11375544	11376923		Zv8_NA2271	62977	63422		Zv8_NA2749	23014	23889		Zv8_NA2777	27016	27432
chr10	11450144	11451829		Zv8_NA2278	12984	13916		Zv8_NA2749	27216	27791		Zv8_NA2777	30390	30840
chr10	12260067	12261579		Zv8_NA2279	7291	7740		Zv8_NA2750	10142	10527		Zv8_NA2777	104257	105019
chr10	13247899	13249998		Zv8_NA2283	26712	28027		Zv8_NA2750	43783	45147		Zv8_NA2777	107834	108457
chr10	13460790	13462664		Zv8_NA2295	13917	14778		Zv8_NA2760	9753	10556		Zv8_NA2777	160947	161413
chr10	13519822	13521577		Zv8_NA2296	38960	39975		Zv8_NA2760	63238	63905		Zv8_NA2804	4906	5498
chr10	13615561	13617460		Zv8_NA2302	15887	16969		Zv8_NA2762	270	812		Zv8_NA2808	10070	10619
chr10	13870772	13873123		Zv8_NA2302	52970	53650		Zv8_NA2762	4157	4667		Zv8_NA2811	15996	16590
chr10	13963836	13965553		Zv8_NA2308	4505	4956		Zv8_NA2762	6435	7860		Zv8_NA2811	16593	17280
chr10	14192877	14196657		Zv8_NA2308	19215	21050		Zv8_NA2762	24928	25578		Zv8_NA2811	34411	35266
chr10	14292745	14294817		Zv8_NA2308	23270	24503		Zv8_NA2776	37426	37774		Zv8_NA2847	30060	30461
chr10	14412076	14413589		Zv8_NA2308	37886	38983		Zv8_NA2776	37984	38390		Zv8_NA2851	6983	7519
chr10	15887528	15889312		Zv8_NA2308	47516	48301		Zv8_NA2777	5622	6337		Zv8_NA2858	29586	30196
chr10	16524790	16526178		Zv8_NA2308	49677	53042		Zv8_NA2777	10441	11363		Zv8_NA2858	61154	61959
chr10	16853826	16855407		Zv8_NA2320	47396	47806		Zv8_NA2777	17217	17645		Zv8_NA2858	63827	64766
chr10	17239825	17241585		Zv8_NA2321	5791	6296		Zv8_NA2777	18315	18926		Zv8_NA2888	4922	5373
chr10	18113540	18115549		Zv8_NA2321	24983	25523		Zv8_NA2777	19995	20842		Zv8_NA2902	12284	12847
chr10	19999285	20001228		Zv8_NA2321	31854	32144		Zv8_NA2777	22426	23325		Zv8_NA2919	20091	20645
chr10	20328478	20330371		Zv8_NA2321	33995	34564		Zv8_NA2777	24381	25002		Zv8_NA2930	37868	38687
chr10	21072061	21074430		Zv8_NA2321	35546	35946		Zv8_NA2777	26578	27254		Zv8_NA2930	69543	70172
chr10	21311207	21314402		Zv8_NA2321	36234	37024		Zv8_NA2777	29083	29671		Zv8_NA2930	71557	72175
chr10	21441121	21444898		Zv8_NA2324	47139	48261		Zv8_NA2782	950	1408		Zv8_NA2930	83491	84110
chr10	21449945	21452163		Zv8_NA2324	51215	52384		Zv8_NA2807	792	1035		Zv8_NA2932	645	1503
chr10	21628279	21630047		Zv8_NA2324	90851	91191		Zv8_NA2811	15578	16422		Zv8_NA2932	39611	40184
chr10	21950446	21951447		Zv8_NA2329	77044	77281		Zv8_NA2811	29677	30280		Zv8_NA2932	77675	78131
chr10	22678650	22680152		Zv8_NA2338	2321	3053		Zv8_NA2824	8772	9675		Zv8_NA2942	39329	39824
chr10	22963557	22966051		Zv8_NA2341	25173	25714		Zv8_NA2824	12454	12834		Zv8_NA2945	13991	15356
chr10	23080006	23082281		Zv8_NA2342	21173	23359		Zv8_NA2878	48182	48691		Zv8_NA2947	52378	52961
chr10	23906180	23908315		Zv8_NA2342	23918	25155		Zv8_NA2892	7760	8114		Zv8_NA2952	26119	26822
chr10	23908817	23910691		Zv8_NA2342	42159	43004		Zv8_NA2900	7872	8593		Zv8_NA2952	36898	37442
chr10	24051572	24053514		Zv8_NA2363	70706	71289		Zv8_NA2903	596	1087		Zv8_NA2963	32732	33341
chr10	25311784	25314418		Zv8_NA2365	231	3009		Zv8_NA2903	11285	11751		Zv8_NA2976	3726	4296
chr10	27270215	27271941		Zv8_NA2365	69562	70380		Zv8_NA2903	36078	36434		Zv8_NA2976	6466	7417
chr10	27904082	27906008		Zv8_NA2365	73342	74154		Zv8_NA2914	6644	7382		Zv8_NA2981	7942	8895
chr10	28011330	28013188		Zv8_NA2425	12619	13768		Zv8_NA2914	14172	14515		Zv8_NA2993	123361	123767
chr10	28642744	28645089		Zv8_NA2425	15888	18097		Zv8_NA2914	32762	33104		Zv8_NA2996	33663	34124
chr10	29554940	29557667		Zv8_NA2425	25065	25442		Zv8_NA2930	76364	76861		Zv8_NA3018	19337	19788
chr10	29558685	29565793		Zv8_NA2442	1409	2048		Zv8_NA2932	687	1291		Zv8_NA3022	66159	66833
chr10	31818535	31819913		Zv8_NA2445	18984	19256		Zv8_NA2932	99886	100980		Zv8_NA3022	138263	138822
chr10	32689493	32691876		Zv8_NA2446	8555	9580		Zv8_NA2932	103904	104351		Zv8_NA3024	7422	8042
chr10	33649267	33650762		Zv8_NA2463	34697	35260		Zv8_NA2947	16840	17737		Zv8_NA3039	15213	15796
chr10	33756602	33758194		Zv8_NA2485	7695	8104		Zv8_NA2947	39181	39971		Zv8_NA3041	5092	5907
chr10	34414046	34416553		Zv8_NA2494	16093	16671		Zv8_NA2947	42395	43210		Zv8_NA3060	19679	20305
chr10	34555887	34558160		Zv8_NA2494	29989	30557		Zv8_NA2947	43667	44831		Zv8_NA3060	25051	25777
chr10	34882121	34883643		Zv8_NA2510	61030	61314		Zv8_NA2947	52403	52960		Zv8_NA3062	5175	6981
chr10	34884351	34886487		Zv8_NA2529	368	911		Zv8_NA2952	36826	37257		Zv8_NA3065	21685	22406
chr10	36097404	36099096		Zv8_NA2535	7489	8253		Zv8_NA2952	39344	40134		Zv8_NA3066	17134	17785
chr10	36140453	36144178		Zv8_NA2538	116730	117546		Zv8_NA2956	204	967		Zv8_NA3066	25500	26533
chr10	36150726	36152860		Zv8_NA2538	121990	122305		Zv8_NA2976	19324	19910		Zv8_NA3066	29516	30336
chr10	36327340	36329458		Zv8_NA2543	11771	12287		Zv8_NA3008	12407	12930		Zv8_NA3066	52970	53750
chr10	36467315	36469849		Zv8_NA2543	60793	62683		Zv8_NA3015	7886	8491		Zv8_NA3081	19455	20008
chr10	36473655	36475916		Zv8_NA2543	64733	65748		Zv8_NA3015	14030	14356		Zv8_NA3085	13060	13622
chr10	36684873	36686910		Zv8_NA2543	67675	69135		Zv8_NA3024	27553	28490		Zv8_NA3087	8136	8528
chr10	40267995	40269552		Zv8_NA2543	69800	71416		Zv8_NA3044	12685	13634		Zv8_NA3092	9204	9826
chr10	41289358	41291197		Zv8_NA2545	19792	20313		Zv8_NA3049	36294	37282		Zv8_NA3110	8152	8919
chr10	42642384	42644641		Zv8_NA2545	88908	89282		Zv8_NA3049	40808	41345		Zv8_NA3111	4027	4534
chr10	42763059	42764489		Zv8_NA2545	104935	105187		Zv8_NA3056	13442	13688		Zv8_NA3121	38070	38550
chr11	2307881	2310540		Zv8_NA2545	105454	105902		Zv8_NA3058	3681	4103		Zv8_NA3125	5816	6725
chr11	2565244	2568143		Zv8_NA2594	27716	28670		Zv8_NA3065	33960	34959		Zv8_NA3126	47375	48045
chr11	2731213	2733736		Zv8_NA2594	41439	41857		Zv8_NA3066	14587	15367		Zv8_NA3126	126686	127474
chr11	5109864	5111970		Zv8_NA2594	69895	70130		Zv8_NA3066	37091	37472		Zv8_NA3126	145618	146290
chr11	5801167	5803080		Zv8_NA2594	89329	89808		Zv8_NA3068	10320	10679		Zv8_NA3126	151487	152233
chr11	6134833	6136631		Zv8_NA2594	102762	104783		Zv8_NA3085	12795	13514		Zv8_NA3126	153948	154717
chr11	6175299	6177743		Zv8_NA2595	90545	90938		Zv8_NA3087	7800	8330		Zv8_NA3131	17090	17711
chr11	6275891	6277259		Zv8_NA2597	1514	2272		Zv8_NA3092	9209	9752		Zv8_NA3144	6819	7378
chr11	6482264	6483456		Zv8_NA2599	8885	9953		Zv8_NA3098	21316	22490		Zv8_NA3163	10379	11181
chr11	6571430	6573367		Zv8_NA2600	0	548		Zv8_NA3122	30187	30641		Zv8_NA3168	29388	30022
chr11	7434746	7436252		Zv8_NA2601	2094	2683		Zv8_NA3126	53935	54269		Zv8_NA3173	16139	16599
chr11	7676883	7678475		Zv8_NA2623	68336	68767		Zv8_NA3126	114540	115656		Zv8_NA3176	27007	27747
chr11	8113615	8116499		Zv8_NA2623	82028	83573		Zv8_NA3126	130325	134285		Zv8_NA3176	101692	102256
chr11	8180815	8183627		Zv8_NA2623	88589	90526		Zv8_NA3126	139601	140989		Zv8_NA3176	107284	107877
chr11	8193741	8195976		Zv8_NA2623	95149	96511		Zv8_NA3126	153336	154764		Zv8_NA3179	4537	5023
chr11	8984416	8986328		Zv8_NA2623	100505	101260		Zv8_NA3126	158720	159982		Zv8_NA3183	405	1022
chr11	9406341	9407794		Zv8_NA2623	106097	106385		Zv8_NA3163	10575	11022		Zv8_NA3183	17163	17696
chr11	10448220	10450637		Zv8_NA2623	131145	131765		Zv8_NA3173	188610	188916		Zv8_NA3187	14865	15427
chr11	13638045	13639738		Zv8_NA2627	53310	53913		Zv8_NA3176	36623	37905		Zv8_NA3188	615	1214
chr11	17765651	17767050		Zv8_NA2630	984	1672		Zv8_NA3176	97480	98679		Zv8_NA3223	1186	1756
chr11	18102324	18103676		Zv8_NA2639	22020	22635		Zv8_NA3176	109577	110166		Zv8_NA3223	7085	7668
chr11	18108141	18111264		Zv8_NA2639	24482	27044		Zv8_NA3183	507	932		Zv8_NA3223	47303	47642
chr11	18419286	18421087		Zv8_NA2639	31895	32367		Zv8_NA3183	2901	3562		Zv8_NA3223	51038	51781
chr11	18697027	18699608		Zv8_NA2639	35483	36485		Zv8_NA3183	35680	36036		Zv8_NA3249	278	863
chr11	18792609	18794838		Zv8_NA2639	37530	38210		Zv8_NA3183	36697	37431		Zv8_NA3249	7485	8413
chr11	18819101	18821586		Zv8_NA2640	2598	3663		Zv8_NA320	27554	27938		Zv8_NA3249	24450	25194
chr11	18829519	18832032		Zv8_NA2641	782	1370		Zv8_NA3215	4224	4957		Zv8_NA3249	31113	31657
chr11	20606722	20608087		Zv8_NA2641	17842	18292		Zv8_NA3215	33833	34989		Zv8_NA3249	33353	33868
chr11	20639497	20641971		Zv8_NA2641	53739	55247		Zv8_NA3223	980	1998		Zv8_NA3250	7206	7732
chr11	20960270	20962532		Zv8_NA2650	50353	51473		Zv8_NA3223	3829	4290		Zv8_NA3275	26293	27040
chr11	21127351	21130071		Zv8_NA2654	79777	80482		Zv8_NA3223	22313	22967		Zv8_NA3292	21170	22135
chr11	21193170	21195114		Zv8_NA2659	31138	31495		Zv8_NA3223	94618	95159		Zv8_NA3303	10120	11237
chr11	21593930	21595458		Zv8_NA2665	71872	72774		Zv8_NA3223	116647	117444		Zv8_NA3309	22877	23369
chr11	22075808	22078126		Zv8_NA2666	13814	14463		Zv8_NA3234	6751	7961		Zv8_NA3328	279411	280386
chr11	22386978	22389322		Zv8_NA2666	15220	16139		Zv8_NA3235	3062	3565		Zv8_NA3328	286514	287430
chr11	23084761	23086023		Zv8_NA2689	1822	2871		Zv8_NA3240	10093	10716		Zv8_NA3328	290671	291490
chr11	23095744	23098148		Zv8_NA2689	22469	23016		Zv8_NA3249	4828	5534		Zv8_NA3328	306662	307132
chr11	23861018	23863869		Zv8_NA2692	2331	3135		Zv8_NA3249	7022	8108		Zv8_NA3343	40173	40583
chr11	24766727	24771741		Zv8_NA2706	4054	4695		Zv8_NA3249	14009	14816		Zv8_NA3343	79925	80365
chr11	25344193	25345930		Zv8_NA2708	6247	7328		Zv8_NA3249	25778	26656		Zv8_NA3344	3186	4479
chr11	25573005	25575352		Zv8_NA2708	19796	20322		Zv8_NA3249	31365	31664		Zv8_NA3349	31209	32047
chr11	25727631	25729172		Zv8_NA2721	2233	2879		Zv8_NA3249	35587	36048		Zv8_NA3352	2840	3346
chr11	26553686	26556602		Zv8_NA2727	49	1421		Zv8_NA3266	201904	202442		Zv8_NA3358	50494	51158
chr11	27564431	27567002		Zv8_NA2729	85726	86008		Zv8_NA3272	65360	65745		Zv8_NA3358	97833	98384
chr11	28721602	28723248		Zv8_NA2733	43603	44377		Zv8_NA3274	15607	16640		Zv8_NA3358	214130	214592
chr11	28872296	28874771		Zv8_NA2733	46426	47384		Zv8_NA3277	4137	4517		Zv8_NA3360	3232	4201
chr11	29399535	29401746		Zv8_NA2733	90339	92410		Zv8_NA3281	10934	11311		Zv8_NA337	13159	14125
chr11	30413869	30418157		Zv8_NA2733	99148	99749		Zv8_NA3322	29531	30254		Zv8_NA337	16286	17027
chr11	31600021	31602944		Zv8_NA2733	103318	103876		Zv8_NA3322	50399	51035		Zv8_NA3374	46328	46870
chr11	32240034	32242209		Zv8_NA2739	678	1009		Zv8_NA3326	27298	27888		Zv8_NA3379	15969	16440
chr11	32493330	32496382		Zv8_NA2750	3525	4115		Zv8_NA3328	279498	280190		Zv8_NA3390	59447	60068
chr11	32637268	32639133		Zv8_NA2760	41036	41911		Zv8_NA3328	291192	291691		Zv8_NA3390	65826	66416
chr11	32670492	32672360		Zv8_NA2760	63118	63878		Zv8_NA3328	313950	314964		Zv8_NA3401	5877	6558
chr11	32676004	32677448		Zv8_NA2762	3941	5170		Zv8_NA3328	328249	329002		Zv8_NA3412	51967	52579
chr11	35117124	35119922		Zv8_NA2777	5630	6241		Zv8_NA3343	28879	29245		Zv8_NA3412	57455	58177
chr11	35148413	35150155		Zv8_NA2777	8080	8637		Zv8_NA3343	76313	77252		Zv8_NA3431	108	656
chr11	35616886	35618379		Zv8_NA2777	9939	11632		Zv8_NA3343	79607	80244		Zv8_NA3447	15777	16337
chr11	36201870	36203763		Zv8_NA2777	12060	12454		Zv8_NA3343	105376	105722		Zv8_NA3447	39357	39896
chr11	36974106	36975746		Zv8_NA2777	15187	16730		Zv8_NA3343	120724	121174		Zv8_NA3457	3472	4171
chr11	37633867	37636087		Zv8_NA2777	17048	17754		Zv8_NA3349	31282	31957		Zv8_NA3466	29902	30711
chr11	37794579	37797105		Zv8_NA2777	18266	18937		Zv8_NA3349	35315	36349		Zv8_NA3466	69107	69891
chr11	40877171	40878705		Zv8_NA2777	19983	20716		Zv8_NA3358	214341	214586		Zv8_NA3500	57238	57698
chr11	41783162	41785988		Zv8_NA2777	24542	25065		Zv8_NA3358	287128	288060		Zv8_NA3500	68715	69218
chr11	41800899	41802740		Zv8_NA2811	9436	10343		Zv8_NA3360	458	954		Zv8_NA3503	10155	10665
chr11	41819688	41822598		Zv8_NA2811	16604	17140		Zv8_NA3379	3513	3861		Zv8_NA3528	4328	4926
chr12	2002838	2004563		Zv8_NA2811	29703	30297		Zv8_NA3383	6328	6665		Zv8_NA3540	8267	8776
chr12	2011377	2012865		Zv8_NA2811	36650	37322		Zv8_NA3390	59963	60421		Zv8_NA3541	25300	25895
chr12	2014396	2015872		Zv8_NA2820	37601	38353		Zv8_NA3399	6371	6696		Zv8_NA3557	5124	5679
chr12	2019281	2022313		Zv8_NA2834	56953	57739		Zv8_NA3399	9188	9897		Zv8_NA3562	24134	24624
chr12	6963402	6965101		Zv8_NA2834	111887	112670		Zv8_NA3399	17216	18718		Zv8_NA3571	68247	68671
chr12	8934388	8935964		Zv8_NA2856	23200	23965		Zv8_NA3412	12279	13132		Zv8_NA3575	21052	21783
chr12	9216429	9218310		Zv8_NA2859	71455	71982		Zv8_NA3470	8262	9076		Zv8_NA3577	49047	49645
chr12	9271092	9272526		Zv8_NA2859	79612	80427		Zv8_NA3470	10426	10933		Zv8_NA3582	10117	10552
chr12	9322705	9323686		Zv8_NA2859	80690	81717		Zv8_NA3470	30865	31614		Zv8_NA3584	93313	93803
chr12	9353622	9356014		Zv8_NA2859	84586	85163		Zv8_NA3500	25677	26355		Zv8_NA3584	182549	183129
chr12	9388069	9389741		Zv8_NA2859	129379	129603		Zv8_NA3500	75051	75418		Zv8_NA3597	3804	4352
chr12	9400450	9403087		Zv8_NA2859	130809	132066		Zv8_NA3503	10138	10763		Zv8_NA3597	9835	10319
chr12	11199034	11201522		Zv8_NA2859	137296	137658		Zv8_NA3522	30430	30804		Zv8_NA3609	60248	60808
chr12	12592798	12594562		Zv8_NA2867	2891	3349		Zv8_NA3528	4276	4805		Zv8_NA3609	70181	70731
chr12	12719403	12721234		Zv8_NA2878	34866	35365		Zv8_NA3571	20996	21369		Zv8_NA3610	25149	25987
chr12	13081604	13084591		Zv8_NA2878	71473	72770		Zv8_NA3577	14759	15219		Zv8_NA3610	49989	50593
chr12	13679591	13681523		Zv8_NA2888	21771	22282		Zv8_NA3597	9826	10301		Zv8_NA3610	53865	55380
chr12	16303980	16306194		Zv8_NA2894	1546	2196		Zv8_NA3604	55978	56372		Zv8_NA3626	40895	41575
chr12	18601211	18604175		Zv8_NA2914	59670	60067		Zv8_NA3609	21689	22111		Zv8_NA3626	54918	55530
chr12	19568286	19571630		Zv8_NA2916	5430	5769		Zv8_NA3609	27252	27590		Zv8_NA3635	19744	20305
chr12	21523229	21524950		Zv8_NA2926	1267	2110		Zv8_NA3610	50077	50685		Zv8_NA3637	11440	11954
chr12	21721329	21722485		Zv8_NA2929	713	1062		Zv8_NA3626	28808	29304		Zv8_NA3650	5275	5828
chr12	21917857	21920876		Zv8_NA2930	76313	76964		Zv8_NA3633	61568	61976		Zv8_NA3665	17214	18185
chr12	22081221	22082990		Zv8_NA2930	78685	79925		Zv8_NA3635	124639	125292		Zv8_NA3674	11617	12146
chr12	22503464	22506567		Zv8_NA2932	99413	101137		Zv8_NA3637	80115	81228		Zv8_NA3682	100390	101255
chr12	22746795	22748305		Zv8_NA2932	103682	104435		Zv8_NA3637	86623	87014		Zv8_NA3682	101854	102706
chr12	24480424	24482735		Zv8_NA2934	1047	1964		Zv8_NA3637	130422	131055		Zv8_NA3682	120715	121348
chr12	26518327	26520527		Zv8_NA2947	17051	17445		Zv8_NA3638	267	692		Zv8_NA3683	37632	38913
chr12	26577659	26580569		Zv8_NA2956	185	786		Zv8_NA3650	8260	8955		Zv8_NA3683	55419	55925
chr12	27470602	27473704		Zv8_NA2963	20719	21123		Zv8_NA3662	36445	37237		Zv8_NA3683	68303	68842
chr12	28227753	28229604		Zv8_NA2975	7647	7998		Zv8_NA3672	21013	21725		Zv8_NA3695	42283	43233
chr12	29181853	29183978		Zv8_NA2976	806	2253		Zv8_NA3682	103460	103787		Zv8_NA3704	38028	38541
chr12	29197310	29198969		Zv8_NA2976	3293	4927		Zv8_NA3682	107626	108225		Zv8_NA3704	72820	73236
chr12	29911649	29914494		Zv8_NA2976	5541	7134		Zv8_NA3683	33660	34509		Zv8_NA3704	96589	97226
chr12	29939656	29941221		Zv8_NA2976	11011	12062		Zv8_NA3683	37512	38586		Zv8_NA3725	9215	9839
chr12	30366343	30368264		Zv8_NA2976	12597	14979		Zv8_NA3683	103694	104174		Zv8_NA3725	20660	21476
chr12	30368671	30370329		Zv8_NA2976	15224	18363		Zv8_NA3686	5627	6238		Zv8_NA3725	23187	23813
chr12	30653287	30656335		Zv8_NA2987	33668	35107		Zv8_NA3704	38105	38571		Zv8_NA3725	29156	29896
chr12	30686441	30688456		Zv8_NA2993	122762	123104		Zv8_NA3704	91379	91859		Zv8_NA3740	709	1180
chr12	31330409	31331587		Zv8_NA3018	19158	19908		Zv8_NA3704	96263	97064		Zv8_NA3740	110583	111121
chr12	31639086	31641462		Zv8_NA3021	1752	2201		Zv8_NA3704	169005	169765		Zv8_NA3744	3937	4538
chr12	31851357	31857117		Zv8_NA3024	7503	7929		Zv8_NA3709	37900	38763		Zv8_NA3748	246533	247518
chr12	32364676	32366124		Zv8_NA3024	11822	12443		Zv8_NA3725	23152	23721		Zv8_NA3748	266282	266957
chr12	33887769	33889352		Zv8_NA3025	688	1262		Zv8_NA3725	25029	26001		Zv8_NA3748	323007	323747
chr12	34447023	34448077		Zv8_NA3039	15189	16155		Zv8_NA3725	31654	32467		Zv8_NA3750	8569	9184
chr12	34580752	34583061		Zv8_NA3049	45088	45411		Zv8_NA3725	48191	48523		Zv8_NA3751	13386	14575
chr12	34588082	34590145		Zv8_NA3049	48228	49063		Zv8_NA3732	4649	5400		Zv8_NA3754	20729	21534
chr12	34713494	34715061		Zv8_NA3058	1035	1269		Zv8_NA3748	50255	51388		Zv8_NA3754	41864	42740
chr12	35222699	35226953		Zv8_NA3066	22221	22688		Zv8_NA3748	229574	230278		Zv8_NA3754	43310	44121
chr12	35437003	35438596		Zv8_NA3066	44761	45535		Zv8_NA3748	246284	246561		Zv8_NA3754	52197	52752
chr12	36118932	36121966		Zv8_NA3068	14219	15216		Zv8_NA3750	6342	6700		Zv8_NA3762	3858	4404
chr12	36627125	36628936		Zv8_NA3075	725	1700		Zv8_NA3751	17113	17570		Zv8_NA3779	20852	21412
chr12	36701792	36703789		Zv8_NA3078	7900	8260		Zv8_NA3751	18683	19086		Zv8_NA3781	17448	17936
chr12	36709592	36711825		Zv8_NA3085	1263	1736		Zv8_NA3754	20465	21149		Zv8_NA3800	1	540
chr12	37810122	37811850		Zv8_NA3087	21459	22465		Zv8_NA3754	27890	29032		Zv8_NA3808	38599	39228
chr12	37854795	37856078		Zv8_NA3094	10772	11930		Zv8_NA3754	37963	38498		Zv8_NA3809	27985	28752
chr12	37976161	37977890		Zv8_NA3110	3839	4240		Zv8_NA3754	71572	71867		Zv8_NA3817	18092	18652
chr12	38259584	38261511		Zv8_NA3122	30053	30658		Zv8_NA3757	8421	9160		Zv8_NA3833	10392	11152
chr12	41272962	41275542		Zv8_NA3125	17898	18402		Zv8_NA3757	12375	13066		Zv8_NA3833	18007	18542
chr12	41284820	41286169		Zv8_NA3126	126494	127659		Zv8_NA3782	70749	71793		Zv8_NA3850	30415	30901
chr12	41681799	41683620		Zv8_NA3126	130449	133745		Zv8_NA3782	88510	89798		Zv8_NA3850	43462	44025
chr12	41695505	41697571		Zv8_NA3126	151384	152282		Zv8_NA3790	39189	40097		Zv8_NA3857	2391	3045
chr13	442227	445013		Zv8_NA3126	153351	154769		Zv8_NA3790	69735	70115		Zv8_NA3875	1272	1861
chr13	1162546	1166139		Zv8_NA3126	159107	160073		Zv8_NA3817	9344	9721		Zv8_NA3883	31852	32397
chr13	1801628	1803152		Zv8_NA3127	28848	29276		Zv8_NA3818	62274	62743		Zv8_NA3883	64149	65456
chr13	4606774	4610445		Zv8_NA3134	22943	23477		Zv8_NA3832	5582	5975		Zv8_NA3883	88896	89460
chr13	5110473	5112348		Zv8_NA314	8442	8919		Zv8_NA3850	29863	30292		Zv8_NA3883	103620	104580
chr13	5796985	5799007		Zv8_NA3163	15772	16283		Zv8_NA3883	31757	32653		Zv8_NA3883	105928	106684
chr13	6186536	6188315		Zv8_NA3163	18548	18924		Zv8_NA3883	69439	70884		Zv8_NA3883	116502	117017
chr13	6352550	6355078		Zv8_NA3163	19435	19796		Zv8_NA3883	72605	73855		Zv8_NA3883	123431	124576
chr13	6651699	6652991		Zv8_NA3163	34148	34759		Zv8_NA3883	80783	82550		Zv8_NA3883	134293	134849
chr13	6808359	6810739		Zv8_NA3176	25291	26244		Zv8_NA3883	83876	86146		Zv8_NA3883	135732	136411
chr13	6811495	6813495		Zv8_NA3176	36563	37495		Zv8_NA3883	91110	91887		Zv8_NA3883	145659	146193
chr13	7767257	7768418		Zv8_NA3176	43154	43605		Zv8_NA3883	95826	97496		Zv8_NA3883	173186	174919
chr13	7803803	7806152		Zv8_NA3176	109552	109942		Zv8_NA3883	103615	104541		Zv8_NA3883	221828	222426
chr13	10135240	10137655		Zv8_NA320	2253	2800		Zv8_NA3883	123430	124625		Zv8_NA3893	39731	40276
chr13	13222769	13223925		Zv8_NA320	16875	17216		Zv8_NA3883	145605	146196		Zv8_NA3893	48055	48768
chr13	16325889	16327586		Zv8_NA3213	6116	6514		Zv8_NA3883	155022	155370		Zv8_NA3893	88937	89593
chr13	16328880	16330772		Zv8_NA3215	11213	11600		Zv8_NA3883	167261	167940		Zv8_NA3903	43768	44854
chr13	16374536	16376046		Zv8_NA3215	14522	14956		Zv8_NA3883	168166	168533		Zv8_NA3912	11145	11769
chr13	16535859	16538263		Zv8_NA3215	15572	18042		Zv8_NA3883	171191	174999		Zv8_NA3924	20789	21750
chr13	16907959	16910845		Zv8_NA3215	20750	21341		Zv8_NA3883	221277	221753		Zv8_NA3937	70751	71213
chr13	18115506	18117675		Zv8_NA3218	1800	2316		Zv8_NA3883	227782	228249		Zv8_NA3958	87768	88439
chr13	18434062	18436360		Zv8_NA3223	41329	42704		Zv8_NA3884	40959	41316		Zv8_NA3974	6204	6926
chr13	18715040	18716688		Zv8_NA3223	50962	51292		Zv8_NA3886	921	1263		Zv8_NA3975	3433	4122
chr13	19040376	19043370		Zv8_NA3223	94471	95306		Zv8_NA3886	8841	9284		Zv8_NA3975	33485	34205
chr13	19305266	19307304		Zv8_NA3234	6768	8596		Zv8_NA3887	1773	2664		Zv8_NA3975	118975	119524
chr13	22038663	22042370		Zv8_NA3234	20667	21540		Zv8_NA3893	64920	65664		Zv8_NA3984	19023	19683
chr13	22470503	22473164		Zv8_NA3234	24200	24572		Zv8_NA3895	101707	102066		Zv8_NA3984	94537	95068
chr13	24649444	24651836		Zv8_NA3234	25388	26903		Zv8_NA3899	23540	24076		Zv8_NA3984	101183	101817
chr13	24715388	24717948		Zv8_NA3234	29690	31108		Zv8_NA3903	43659	45005		Zv8_NA3997	1630	2388
chr13	25685210	25688349		Zv8_NA3234	36194	36404		Zv8_NA3903	47432	48353		Zv8_NA4000	841	1399
chr13	26211869	26213749		Zv8_NA3235	2997	3552		Zv8_NA3903	53280	54105		Zv8_NA4000	10561	11090
chr13	26947656	26948938		Zv8_NA3240	16487	17176		Zv8_NA3903	57680	58320		Zv8_NA4024	58157	58734
chr13	27046801	27048495		Zv8_NA326	264	702		Zv8_NA3924	37943	38788		Zv8_NA4053	8268	8836
chr13	27653063	27655666		Zv8_NA3266	186391	187330		Zv8_NA3926	1	529		Zv8_NA4056	91961	92523
chr13	27671128	27672427		Zv8_NA327	967	1917		Zv8_NA3937	70748	71075		Zv8_NA4056	94214	95562
chr13	27672432	27673978		Zv8_NA3270	8402	8889		Zv8_NA3937	141348	141869		Zv8_NA4056	98668	99569
chr13	27753918	27756693		Zv8_NA3276	60923	61489		Zv8_NA3941	9871	10303		Zv8_NA4056	106915	107480
chr13	27862388	27863915		Zv8_NA3281	11255	11561		Zv8_NA3974	6340	6697		Zv8_NA4072	2752	3370
chr13	28632067	28634304		Zv8_NA3300	5813	6339		Zv8_NA3997	1650	1992		Zv8_NA4096	43083	43828
chr13	29185516	29187510		Zv8_NA3309	28075	28617		Zv8_NA4000	13297	14013		Zv8_NA4096	56922	57886
chr13	29260092	29261162		Zv8_NA3322	44224	45616		Zv8_NA4002	1186	1902		Zv8_NA4102	19881	20397
chr13	29311270	29313552		Zv8_NA3328	12807	13434		Zv8_NA4008	4400	4751		Zv8_NA4102	30046	30780
chr13	29369148	29371956		Zv8_NA3328	20070	21058		Zv8_NA4039	9336	10135		Zv8_NA4102	44964	45589
chr13	29417399	29418829		Zv8_NA3328	65652	66192		Zv8_NA4046	3009	3584		Zv8_NA4107	89409	90125
chr13	29866152	29867876		Zv8_NA3328	122528	124655		Zv8_NA4050	23191	24344		Zv8_NA4129	21945	22404
chr13	30290360	30292839		Zv8_NA3328	286524	286903		Zv8_NA4050	25983	26795		Zv8_NA4129	48148	48877
chr13	30391053	30393318		Zv8_NA3328	290790	291646		Zv8_NA4056	96924	97617		Zv8_NA4138	2737	3303
chr13	31108880	31110399		Zv8_NA3328	313362	315337		Zv8_NA4102	901	1295		Zv8_NA4138	17452	18036
chr13	31680858	31682392		Zv8_NA3328	327783	328780		Zv8_NA4102	1509	1927		Zv8_NA4138	40278	40797
chr13	31708896	31711950		Zv8_NA3343	28692	29062		Zv8_NA4102	22673	23501		Zv8_NA414	11573	12329
chr13	33372845	33374941		Zv8_NA3343	39727	40294		Zv8_NA4102	60689	61336		Zv8_NA4148	31597	32299
chr13	33440299	33443694		Zv8_NA3343	43123	43408		Zv8_NA4107	84122	84423		Zv8_NA4171	8745	9432
chr13	33519665	33521735		Zv8_NA3349	17284	18595		Zv8_NA4125	4658	5166		Zv8_NA4171	14217	14617
chr13	33621955	33623659		Zv8_NA3349	73065	74526		Zv8_NA4129	56739	57583		Zv8_NA4173	3863	4467
chr13	33910301	33912733		Zv8_NA3349	79813	80600		Zv8_NA4129	57819	58068		Zv8_NA4173	24594	25150
chr13	33932583	33935338		Zv8_NA3360	106	763		Zv8_NA4158	43452	44111		Zv8_NA418	1	377
chr13	35365928	35367763		Zv8_NA3377	4614	5359		Zv8_NA416	135	742		Zv8_NA4181	52096	53055
chr13	35420494	35422670		Zv8_NA3394	6317	6676		Zv8_NA416	36611	36859		Zv8_NA4181	58431	58855
chr13	35435166	35441041		Zv8_NA3399	8595	9321		Zv8_NA416	47011	47287		Zv8_NA4181	87507	88197
chr13	35498427	35499664		Zv8_NA3399	17248	18739		Zv8_NA4174	110132	110447		Zv8_NA4181	88412	89000
chr13	35526150	35530274		Zv8_NA3401	5820	6267		Zv8_NA4174	131401	131719		Zv8_NA4182	1927	2854
chr13	35694927	35697081		Zv8_NA3412	39796	40551		Zv8_NA4175	2911	3811		Zv8_NA4212	16042	17069
chr13	38937170	38938810		Zv8_NA3412	42455	43114		Zv8_NA4181	51728	53085		Zv8_NA4212	45638	46250
chr13	39650937	39652690		Zv8_NA3412	63888	64263		Zv8_NA4181	60318	61683		Zv8_NA4212	70217	70771
chr13	39827026	39828492		Zv8_NA3425	10696	12073		Zv8_NA4181	68983	70058		Zv8_NA4213	17745	18282
chr13	39955194	39956777		Zv8_NA3470	8737	9112		Zv8_NA4181	77556	79495		Zv8_NA4213	109498	110444
chr13	41565736	41568343		Zv8_NA3471	61403	61979		Zv8_NA4181	81585	83134		Zv8_NA4213	121332	121874
chr13	41811996	41813156		Zv8_NA3500	50530	51037		Zv8_NA4181	86817	89190		Zv8_NA4213	166353	167122
chr13	41881980	41883216		Zv8_NA3500	74763	75812		Zv8_NA4193	4803	5546		Zv8_NA4219	38137	38631
chr13	42482864	42485043		Zv8_NA3541	1346	1763		Zv8_NA4212	16992	17330		Zv8_NA4221	95232	96347
chr13	42694793	42697355		Zv8_NA3541	3882	4348		Zv8_NA4212	41166	42602		Zv8_NA4243	118	661
chr13	42709303	42712010		Zv8_NA3541	4916	6067		Zv8_NA4212	56637	58411		Zv8_NA4243	16519	17030
chr13	43980576	43982365		Zv8_NA3541	10873	11269		Zv8_NA4212	81771	82590		Zv8_NA425	9194	10553
chr13	45811503	45813060		Zv8_NA3541	12413	13031		Zv8_NA4212	85405	85664		Zv8_NA4261	23422	23943
chr13	46502800	46505121		Zv8_NA3541	32759	33113		Zv8_NA4213	49103	49468		Zv8_NA4264	22431	23580
chr13	46514423	46517130		Zv8_NA3552	1581	1879		Zv8_NA4213	138694	139602		Zv8_NA4265	39598	40256
chr13	48321851	48323424		Zv8_NA3558	8222	9552		Zv8_NA4228	3710	4323		Zv8_NA4265	59863	60413
chr13	48996940	48998587		Zv8_NA3558	11622	12124		Zv8_NA4243	4959	5291		Zv8_NA4282	74284	74841
chr14	162932	164929		Zv8_NA3562	5055	5653		Zv8_NA4243	5574	5805		Zv8_NA4302	10800	11657
chr14	1517479	1519198		Zv8_NA3562	12727	13277		Zv8_NA4243	6813	7555		Zv8_NA4353	11379	12003
chr14	1905019	1906906		Zv8_NA3562	48456	48858		Zv8_NA425	15855	16184		Zv8_NA4355	18229	18766
chr14	3219512	3221007		Zv8_NA3597	9897	10264		Zv8_NA4264	2235	2641		Zv8_NA4370	62624	63403
chr14	3508790	3510779		Zv8_NA3604	90997	92461		Zv8_NA4264	11329	11631		Zv8_NA4370	84753	85499
chr14	5829551	5832130		Zv8_NA3604	93809	94561		Zv8_NA4264	19698	20121		Zv8_NA4370	108789	109800
chr14	6701495	6703652		Zv8_NA3609	18070	19897		Zv8_NA4264	22448	23411		Zv8_NA4370	194778	195568
chr14	7105863	7107889		Zv8_NA3609	21633	22286		Zv8_NA4272	1932	3074		Zv8_NA4370	207667	208465
chr14	7187860	7189017		Zv8_NA3609	28298	29012		Zv8_NA4282	74528	74843		Zv8_NA4370	252189	252735
chr14	8421876	8423296		Zv8_NA3609	35896	36617		Zv8_NA4286	11145	11845		Zv8_NA4383	37406	37945
chr14	8880924	8883188		Zv8_NA3609	66870	67288		Zv8_NA4286	14866	15473		Zv8_NA4383	49226	49969
chr14	11073988	11076653		Zv8_NA3609	69897	70441		Zv8_NA4302	10673	11515		Zv8_NA4392	52279	53745
chr14	12608799	12610461		Zv8_NA3609	74408	75823		Zv8_NA4322	23754	24124		Zv8_NA4398	16623	17099
chr14	13285681	13287991		Zv8_NA3610	49817	50908		Zv8_NA4322	32515	32965		Zv8_NA4408	48550	49018
chr14	13292895	13295711		Zv8_NA3610	68774	71064		Zv8_NA4338	32027	32392		Zv8_NA4408	83521	83979
chr14	13522954	13525815		Zv8_NA3626	18025	18455		Zv8_NA4338	34333	34865		Zv8_NA4418	27158	27747
chr14	15093247	15096419		Zv8_NA3626	29024	29555		Zv8_NA4370	54239	54479		Zv8_NA4475	64004	64568
chr14	15734920	15737027		Zv8_NA3626	54185	54977		Zv8_NA4370	95116	96021		Zv8_NA4475	67558	68434
chr14	15822999	15828820		Zv8_NA3633	84832	85844		Zv8_NA4370	205760	206153		Zv8_NA4480	73284	73925
chr14	16056491	16059150		Zv8_NA3634	48365	48842		Zv8_NA4370	207594	207920		Zv8_NA4480	92193	92804
chr14	16106202	16108161		Zv8_NA3635	124433	125245		Zv8_NA4417	19243	19607		Zv8_NA4490	11787	12454
chr14	16254069	16256025		Zv8_NA3638	2340	3086		Zv8_NA4460	14860	15295		Zv8_NA4490	22027	22542
chr14	17387780	17390138		Zv8_NA364	3621	3994		Zv8_NA4475	9402	9909		Zv8_NA4491	16759	17315
chr14	17929953	17932341		Zv8_NA3644	390	918		Zv8_NA4475	111518	112018		Zv8_NA4491	73328	73826
chr14	18642670	18645084		Zv8_NA3662	20591	21244		Zv8_NA4477	21629	22091		Zv8_NA4532	17346	18026
chr14	18662654	18665047		Zv8_NA3662	34976	35349		Zv8_NA4480	40932	41341		Zv8_NA4532	27420	28221
chr14	22900658	22902638		Zv8_NA3662	36696	36995		Zv8_NA4480	73191	74100		Zv8_NA4532	46744	47429
chr14	23128929	23130418		Zv8_NA3665	5405	6414		Zv8_NA4490	36415	37677		Zv8_NA4532	58452	59171
chr14	24152616	24154264		Zv8_NA3676	11514	12209		Zv8_NA4490	52850	53723		Zv8_NA4561	30781	32221
chr14	24302929	24305490		Zv8_NA3681	10360	10878		Zv8_NA4490	59558	61481		Zv8_NA4561	100594	101360
chr14	24859797	24862419		Zv8_NA3682	57917	58774		Zv8_NA4490	69463	69835		Zv8_NA4561	103361	103811
chr14	25484803	25487216		Zv8_NA3682	61080	61474		Zv8_NA4513	1358	1741		Zv8_NA4561	112375	113058
chr14	27039606	27042582		Zv8_NA3682	68714	69071		Zv8_NA4527	6102	6878		Zv8_NA4570	9641	10175
chr14	27043915	27050087		Zv8_NA3682	127964	128287		Zv8_NA4532	17547	17920		Zv8_NA4577	2250	2728
chr14	27118741	27121179		Zv8_NA3683	4678	5660		Zv8_NA4532	46689	47240		Zv8_NA4579	105467	106113
chr14	27314932	27316897		Zv8_NA3683	9089	9720		Zv8_NA4532	58077	58795		Zv8_NA4581	8224	8983
chr14	27370745	27372583		Zv8_NA3683	22062	22388		Zv8_NA4532	65586	66028		Zv8_NA4581	11148	11708
chr14	27381564	27387545		Zv8_NA3683	33333	34360		Zv8_NA4561	29317	30385		Zv8_NA4607	103960	104888
chr14	28226205	28227619		Zv8_NA3683	37484	38699		Zv8_NA4561	59468	60946		Zv8_NA4607	110005	110599
chr14	28421211	28424840		Zv8_NA3695	35955	36332		Zv8_NA4561	72028	72509		Zv8_NA4617	42688	43219
chr14	29424363	29427430		Zv8_NA3695	49070	49809		Zv8_NA4561	79937	80255		Zv8_NA462	64069	64677
chr14	29743188	29744623		Zv8_NA3699	8826	9167		Zv8_NA4561	83966	84677		Zv8_NA4641	16455	17227
chr14	30668259	30670771		Zv8_NA3704	66298	66689		Zv8_NA4561	88931	91461		Zv8_NA4658	51665	52266
chr14	32273615	32275945		Zv8_NA3704	69024	69439		Zv8_NA4561	93937	95303		Zv8_NA4666	53789	54648
chr14	32288283	32290292		Zv8_NA3704	69707	72281		Zv8_NA4561	100849	101595		Zv8_NA4666	63350	64201
chr14	32979719	32981915		Zv8_NA3704	86586	87837		Zv8_NA4561	105258	105584		Zv8_NA4666	64270	65057
chr14	33187039	33189465		Zv8_NA3704	96250	97063		Zv8_NA4561	106887	108060		Zv8_NA4688	100251	101101
chr14	33199619	33203162		Zv8_NA3704	97873	98261		Zv8_NA4561	112838	113214		Zv8_NA4688	129793	130441
chr14	33257865	33261402		Zv8_NA3704	185697	186252		Zv8_NA4561	115545	116617		Zv8_NA4688	156117	156752
chr14	33338545	33342248		Zv8_NA3705	17517	18139		Zv8_NA4561	133438	134474		Zv8_NA4688	160082	160767
chr14	33354520	33357891		Zv8_NA3710	1904	2383		Zv8_NA4570	6207	6995		Zv8_NA4716	10863	11530
chr14	33391174	33392543		Zv8_NA3725	24695	25777		Zv8_NA4579	18386	18837		Zv8_NA4723	11400	11871
chr14	33393253	33396137		Zv8_NA3725	31553	31992		Zv8_NA4596	9316	9618		Zv8_NA4723	12202	13206
chr14	33989477	33992164		Zv8_NA3742	27374	28615		Zv8_NA4607	108339	108740		Zv8_NA4723	22501	23077
chr14	34257237	34264086		Zv8_NA3748	50180	51745		Zv8_NA4607	119168	120027		Zv8_NA4779	39241	39759
chr14	34417524	34419717		Zv8_NA3748	53893	55451		Zv8_NA4607	135278	136317		Zv8_NA4806	44001	44618
chr14	35690623	35692590		Zv8_NA3748	65777	66330		Zv8_NA4607	148337	149754		Zv8_NA4811	31769	32277
chr14	36234391	36236659		Zv8_NA3748	218714	219831		Zv8_NA4629	4808	5383		Zv8_NA482	40798	41362
chr14	36326219	36328278		Zv8_NA3748	246289	247349		Zv8_NA4658	120955	121392		Zv8_NA4845	67196	67761
chr14	36530464	36532419		Zv8_NA3748	271138	272240		Zv8_NA4658	124399	124965		Zv8_NA4845	86896	87773
chr14	36798746	36800290		Zv8_NA3748	323047	323526		Zv8_NA4658	129051	129419		Zv8_NA4894	4845	5651
chr14	37235739	37238849		Zv8_NA3751	13337	13950		Zv8_NA4666	20838	21591		Zv8_NA4894	24268	24839
chr14	37240843	37243622		Zv8_NA3752	33594	35931		Zv8_NA4666	54021	54393		Zv8_NA4894	49311	50351
chr14	38160687	38161903		Zv8_NA3754	20363	21719		Zv8_NA4666	63177	64668		Zv8_NA4900	35454	35932
chr14	39168757	39170779		Zv8_NA3754	24518	24923		Zv8_NA4666	99275	99654		Zv8_NA4900	46388	47079
chr14	39834069	39835727		Zv8_NA3754	38026	38600		Zv8_NA4666	103492	104813		Zv8_NA4909	135341	135903
chr14	40944621	40946403		Zv8_NA3754	41763	43041		Zv8_NA4675	6918	7349		Zv8_NA4933	3794	4436
chr14	41415358	41418951		Zv8_NA3754	67234	67594		Zv8_NA4675	9416	9782		Zv8_NA4983	50832	51433
chr14	41516188	41521416		Zv8_NA3757	383	2108		Zv8_NA4688	32825	33351		Zv8_NA4986	60077	60581
chr14	41533982	41536261		Zv8_NA3757	8821	9177		Zv8_NA4688	40961	41480		Zv8_NA5043	52069	52646
chr14	42636205	42638044		Zv8_NA3757	12298	13364		Zv8_NA4688	129794	130148		Zv8_NA5043	66056	67221
chr14	42739793	42745123		Zv8_NA3770	12700	13015		Zv8_NA4688	160055	160398		Zv8_NA5043	70038	70478
chr14	42780587	42781972		Zv8_NA3779	14371	15360		Zv8_NA4692	3698	4152		Zv8_NA5043	101463	102139
chr14	42854362	42858057		Zv8_NA3782	86269	87776		Zv8_NA4692	6832	7299		Zv8_NA5049	625	1261
chr14	43033656	43036433		Zv8_NA3782	88445	89877		Zv8_NA4697	66391	66839		Zv8_NA5057	118135	118559
chr14	44333224	44335298		Zv8_NA3790	22274	22811		Zv8_NA4701	14548	14933		Zv8_NA5061	34763	35540
chr14	44341669	44345257		Zv8_NA3790	27271	27624		Zv8_NA4716	309	619		Zv8_NA5093	8715	9272
chr14	44793552	44796112		Zv8_NA3790	38925	40352		Zv8_NA4716	8637	9353		Zv8_NA5093	10441	10932
chr14	47089107	47091296		Zv8_NA3829	23341	24843		Zv8_NA4798	55461	55914		Zv8_NA5200	30726	31343
chr14	48287670	48290579		Zv8_NA3833	40088	40586		Zv8_NA4798	95310	95717		Zv8_NA5209	28108	28560
chr14	48747488	48749616		Zv8_NA3833	47115	47364		Zv8_NA4798	117563	118001		Zv8_NA5209	72069	73345
chr14	48827004	48828283		Zv8_NA3833	59048	59705		Zv8_NA4811	12423	12662		Zv8_NA5209	76160	76841
chr14	50565608	50568328		Zv8_NA3847	29019	29421		Zv8_NA4811	54335	54638		Zv8_NA5209	149384	149947
chr14	50745732	50748410		Zv8_NA3850	35634	36389		Zv8_NA4819	13586	14431		Zv8_NA5218	14446	15054
chr14	51372206	51374049		Zv8_NA3864	25643	26315		Zv8_NA4819	16242	16941		Zv8_NA5218	33949	34625
chr14	52016951	52018076		Zv8_NA3866	813	1355		Zv8_NA4845	80482	80798		Zv8_NA5222	95	678
chr15	5299755	5302792		Zv8_NA3866	10123	10856		Zv8_NA4845	82030	82353		Zv8_NA5222	25792	26454
chr15	5900641	5903013		Zv8_NA3883	3857	4232		Zv8_NA4845	83192	83449		Zv8_NA5238	9785	10336
chr15	6893169	6895532		Zv8_NA3883	8775	10076		Zv8_NA4845	182674	183308		Zv8_NA5245	69357	69792
chr15	7219601	7221704		Zv8_NA3883	24054	25591		Zv8_NA4865	47490	47943		Zv8_NA5256	1	527
chr15	7405629	7408476		Zv8_NA3883	31541	32204		Zv8_NA4897	10626	11107		Zv8_NA527	25156	25590
chr15	7661339	7664817		Zv8_NA3883	63834	65690		Zv8_NA4897	12304	14042		Zv8_NA5280	32255	33012
chr15	8411236	8412923		Zv8_NA3883	70164	70819		Zv8_NA4900	17870	18245		Zv8_NA5379	17509	18105
chr15	8426006	8429227		Zv8_NA3883	73059	73849		Zv8_NA4900	26043	26556		Zv8_NA5379	24398	25002
chr15	8437725	8439915		Zv8_NA3883	77772	78610		Zv8_NA4931	13439	13854		Zv8_NA5438	43483	44118
chr15	10300607	10302897		Zv8_NA3883	78823	79777		Zv8_NA4983	50621	50903		Zv8_NA5455	43608	44422
chr15	10868860	10870969		Zv8_NA3883	80010	82573		Zv8_NA4983	70263	70842		Zv8_NA546	347	900
chr15	12793345	12796017		Zv8_NA3883	83071	86579		Zv8_NA4983	79287	79626		Zv8_NA5536	20318	20924
chr15	13375712	13377422		Zv8_NA3883	91034	92137		Zv8_NA5004	16832	17104		Zv8_NA5536	21341	22047
chr15	14050412	14052838		Zv8_NA3883	95880	97925		Zv8_NA5045	293	1003		Zv8_NA5536	24965	25436
chr15	15224975	15227399		Zv8_NA3883	103329	104598		Zv8_NA5049	473	867		Zv8_NA5536	46111	46455
chr15	17306848	17308897		Zv8_NA3883	104821	107260		Zv8_NA5057	23921	24264		Zv8_NA5536	67811	68321
chr15	18953126	18954383		Zv8_NA3883	108402	109580		Zv8_NA5061	34857	35664		Zv8_NA5536	80113	80666
chr15	19811497	19813709		Zv8_NA3883	112839	115615		Zv8_NA5093	10502	11251		Zv8_NA5552	15977	16513
chr15	20181405	20183705		Zv8_NA3883	117955	118687		Zv8_NA513	105325	105898		Zv8_NA5585	46011	46528
chr15	20769686	20771144		Zv8_NA3883	126479	127425		Zv8_NA513	111448	111798		Zv8_NA559	11262	11808
chr15	20856725	20859599		Zv8_NA3883	149989	151614		Zv8_NA5209	42251	44757		Zv8_NA5602	92	746
chr15	22458936	22460991		Zv8_NA3883	171144	172210		Zv8_NA5209	48871	49867		Zv8_NA5604	47018	47545
chr15	22610603	22612675		Zv8_NA3883	172595	174800		Zv8_NA5209	53962	55330		Zv8_NA5605	23099	23699
chr15	22625063	22626575		Zv8_NA3884	33288	33625		Zv8_NA5209	72346	73200		Zv8_NA5609	24944	25487
chr15	23570937	23573399		Zv8_NA3884	45057	45460		Zv8_NA5209	76005	76422		Zv8_NA5615	50133	50694
chr15	25110473	25115733		Zv8_NA3888	984	1953		Zv8_NA521	13474	14068		Zv8_NA5628	7054	7667
chr15	25823553	25825706		Zv8_NA3899	87109	87475		Zv8_NA5218	27166	28875		Zv8_NA5644	5725	6132
chr15	25894777	25898765		Zv8_NA3899	88739	90284		Zv8_NA5218	30612	31080		Zv8_NA5671	1504	2101
chr15	26472155	26473973		Zv8_NA3899	91884	92236		Zv8_NA5222	22001	22361		Zv8_NA5688	3333	3875
chr15	27186865	27190187		Zv8_NA3899	92565	93520		Zv8_NA5222	28003	28603		Zv8_NA578	5404	6157
chr15	28160915	28162573		Zv8_NA3899	147724	148550		Zv8_NA5228	5656	5939		Zv8_NA5961	3765	4385
chr15	28237112	28238961		Zv8_NA3899	152952	153689		Zv8_NA5228	28547	29140		Zv8_NA5982	5454	5978
chr15	28871444	28872870		Zv8_NA3903	53741	54163		Zv8_NA5263	31537	32011		Zv8_NA6005	49892	50413
chr15	28903706	28906263		Zv8_NA3921	32144	33152		Zv8_NA5263	32268	32617		Zv8_NA6030	1978	2933
chr15	29225132	29227815		Zv8_NA3921	34686	35838		Zv8_NA5354	5129	5697		Zv8_NA6036	14184	14627
chr15	29229341	29231527		Zv8_NA3921	36804	37278		Zv8_NA5379	17112	18166		Zv8_NA6036	43810	44364
chr15	29235395	29239989		Zv8_NA3924	37869	38580		Zv8_NA5393	8007	8316		Zv8_NA6036	46613	47604
chr15	29244566	29246125		Zv8_NA3926	1739	2350		Zv8_NA5441	52641	52830		Zv8_NA6036	129521	130049
chr15	29253923	29255988		Zv8_NA3931	33868	35563		Zv8_NA5455	43870	44304		Zv8_NA6036	148426	149289
chr15	29336830	29340069		Zv8_NA3931	60605	60979		Zv8_NA546	216	1106		Zv8_NA6036	165726	166334
chr15	29379738	29381666		Zv8_NA3932	2632	3048		Zv8_NA5469	1871	2472		Zv8_NA6036	238020	238619
chr15	29595664	29597776		Zv8_NA3937	141249	141844		Zv8_NA5469	10388	11874		Zv8_NA6036	289779	290123
chr15	30310811	30315880		Zv8_NA3942	512	937		Zv8_NA5536	20968	21795		Zv8_NA6036	308049	308584
chr15	31410688	31413011		Zv8_NA3975	33801	34325		Zv8_NA5536	25155	25538		Zv8_NA6036	397919	398482
chr15	31660527	31661615		Zv8_NA3975	45299	46548		Zv8_NA5536	79665	80258		Zv8_NA6072	50752	51614
chr15	33427225	33429174		Zv8_NA3976	40359	41275		Zv8_NA5536	81058	81317		Zv8_NA6078	33354	34025
chr15	33431073	33433093		Zv8_NA3984	76095	76814		Zv8_NA5585	49868	50595		Zv8_NA6078	37606	38126
chr15	33433277	33435252		Zv8_NA3984	103621	104406		Zv8_NA5585	94874	95388		Zv8_NA6092	9336	10030
chr15	35037311	35039436		Zv8_NA3995	24289	24580		Zv8_NA5588	4104	4655		Zv8_NA6094	1617	2159
chr15	35993085	35994352		Zv8_NA4002	1180	2262		Zv8_NA5599	8432	9015		Zv8_NA6094	25705	26326
chr15	37012219	37014651		Zv8_NA4006	46886	47232		Zv8_NA5604	47118	47443		Zv8_NA6094	47569	48376
chr15	37574614	37578548		Zv8_NA4006	48979	50239		Zv8_NA5615	90522	91024		Zv8_NA61	8001	8620
chr15	38732195	38734017		Zv8_NA4008	4325	4839		Zv8_NA5623	11095	11518		Zv8_NA6106	2710	3214
chr15	39565192	39566799		Zv8_NA4008	5449	5707		Zv8_NA5624	70539	71380		Zv8_NA6106	9314	9936
chr15	40182454	40183884		Zv8_NA4025	12673	13375		Zv8_NA5624	96917	97294		Zv8_NA6257	13434	14100
chr15	40945591	40947744		Zv8_NA4029	163	770		Zv8_NA5626	54219	54549		Zv8_NA6294	48120	48660
chr15	41086024	41088245		Zv8_NA4039	9510	10245		Zv8_NA5671	1360	1939		Zv8_NA6294	66932	67666
chr15	42060312	42063931		Zv8_NA4050	39325	39667		Zv8_NA578	5556	6173		Zv8_NA6422	9741	10197
chr15	42299840	42303423		Zv8_NA4056	68099	69306		Zv8_NA584	4459	5161		Zv8_NA6422	36392	37323
chr15	42721530	42725337		Zv8_NA4056	78849	79413		Zv8_NA5922	3326	4145		Zv8_NA6434	36033	36417
chr15	42725927	42728700		Zv8_NA4056	104434	104828		Zv8_NA5922	11521	11876		Zv8_NA6434	45382	45935
chr15	43818876	43820616		Zv8_NA4102	33257	35238		Zv8_NA5922	14306	15142		Zv8_NA6447	55938	56633
chr15	44866489	44868306		Zv8_NA4102	40473	40941		Zv8_NA5929	31477	31837		Zv8_NA6459	107283	107880
chr16	529141	530684		Zv8_NA4102	60174	61149		Zv8_NA594	13878	14185		Zv8_NA6459	112265	112876
chr16	1063771	1066015		Zv8_NA4107	16259	16526		Zv8_NA594	29367	29906		Zv8_NA654	775	1387
chr16	1238803	1240122		Zv8_NA4107	52148	52534		Zv8_NA5956	304	589		Zv8_NA6681	1100	1637
chr16	1263103	1264586		Zv8_NA4107	79891	80627		Zv8_NA5994	7705	8069		Zv8_NA6683	443	1129
chr16	1526669	1528935		Zv8_NA4116	396	751		Zv8_NA6005	27588	28536		Zv8_NA6683	2254	2807
chr16	3090627	3092625		Zv8_NA4129	98753	99339		Zv8_NA6008	46496	47122		Zv8_NA6710	6434	7038
chr16	3093806	3095005		Zv8_NA4129	108484	108858		Zv8_NA6027	27701	28132		Zv8_NA697	33970	34373
chr16	4180530	4183244		Zv8_NA4138	40037	41083		Zv8_NA6027	44339	44736		Zv8_NA7	22687	23180
chr16	4600732	4602736		Zv8_NA4174	131039	131919		Zv8_NA6030	86	736		Zv8_NA7047	1419	1890
chr16	5160952	5162671		Zv8_NA418	0	356		Zv8_NA6036	57774	58180		Zv8_NA707	17015	17780
chr16	5170078	5174278		Zv8_NA4181	69298	69663		Zv8_NA6036	123447	123763		Zv8_NA707	19765	20525
chr16	5932490	5934090		Zv8_NA4181	81451	82902		Zv8_NA6036	165707	166252		Zv8_NA7081	5377	5928
chr16	6549310	6551665		Zv8_NA4181	86808	88941		Zv8_NA6036	350206	350899		Zv8_NA7111	3601	4144
chr16	6617470	6619047		Zv8_NA4182	1864	2248		Zv8_NA6074	2904	3455		Zv8_NA713	1	887
chr16	6686865	6688657		Zv8_NA4206	4971	5999		Zv8_NA6076	25254	25965		Zv8_NA714	18019	18581
chr16	6700862	6702332		Zv8_NA4211	219	1670		Zv8_NA6078	5573	6298		Zv8_NA714	21782	22468
chr16	6705179	6707845		Zv8_NA4212	10842	11786		Zv8_NA6114	2351	3200		Zv8_NA7271	6500	7376
chr16	6826438	6828774		Zv8_NA4212	37793	38072		Zv8_NA6134	18932	19718		Zv8_NA7271	20783	21837
chr16	7194550	7196230		Zv8_NA4212	54146	55599		Zv8_NA6147	305	1083		Zv8_NA7271	34408	34915
chr16	7414579	7416213		Zv8_NA4212	57389	58087		Zv8_NA6193	1418	1756		Zv8_NA7327	2985	3650
chr16	8112237	8114417		Zv8_NA4212	70377	70766		Zv8_NA6231	4555	4855		Zv8_NA7390	4611	5161
chr16	8382531	8384896		Zv8_NA4212	81695	83616		Zv8_NA6257	26413	26779		Zv8_NA7390	7750	8478
chr16	8791320	8792699		Zv8_NA4212	84967	86412		Zv8_NA6260	226	929		Zv8_NA74	20476	21421
chr16	9743501	9745491		Zv8_NA4212	89360	90023		Zv8_NA6260	1422	1921		Zv8_NA7415	204	761
chr16	10738501	10741855		Zv8_NA4212	103525	104555		Zv8_NA6288	8328	8788		Zv8_NA7415	4937	5463
chr16	11106928	11109108		Zv8_NA4212	106307	107226		Zv8_NA6288	9274	9670		Zv8_NA7513	699	1248
chr16	12106170	12107635		Zv8_NA4221	46136	46633		Zv8_NA6294	7558	8088		Zv8_NA753	6254	6802
chr16	12121411	12123394		Zv8_NA4224	3286	4020		Zv8_NA6294	40191	40820		Zv8_NA753	20297	21011
chr16	12293750	12296509		Zv8_NA4224	19178	23024		Zv8_NA6321	324	998		Zv8_NA7562	33836	34414
chr16	12495560	12497253		Zv8_NA4224	32803	33545		Zv8_NA6356	26656	27577		Zv8_NA7572	13524	14169
chr16	13819140	13820444		Zv8_NA4224	56538	57557		Zv8_NA6356	62335	62718		Zv8_NA7574	20765	21368
chr16	15343812	15347163		Zv8_NA4243	22135	22561		Zv8_NA6387	4845	5279		Zv8_NA761	2316	2879
chr16	17892650	17895158		Zv8_NA4247	98471	98858		Zv8_NA641	666	1444		Zv8_NA7681	2934	4126
chr16	20668125	20669366		Zv8_NA4252	26389	26726		Zv8_NA6439	10	298		Zv8_NA7681	9927	10720
chr16	21789342	21792071		Zv8_NA4268	19613	20133		Zv8_NA6447	43708	44194		Zv8_NA7693	10988	11402
chr16	21792183	21797582		Zv8_NA4268	30656	30996		Zv8_NA6459	107230	107582		Zv8_NA7725	106	627
chr16	22469157	22470577		Zv8_NA4268	34801	35108		Zv8_NA6488	7108	7877		Zv8_NA773	34130	34607
chr16	22679541	22681515		Zv8_NA4268	36193	36562		Zv8_NA658	1079	3453		Zv8_NA7784	782	1244
chr16	23269492	23271237		Zv8_NA4272	2101	3362		Zv8_NA6683	121	1123		Zv8_NA7823	75813	77002
chr16	24745036	24748672		Zv8_NA4272	13412	15514		Zv8_NA6683	4050	5055		Zv8_NA7823	109310	110359
chr16	25823292	25825387		Zv8_NA4282	96725	97543		Zv8_NA6683	6817	7526		Zv8_NA7823	113092	113450
chr16	26526163	26528720		Zv8_NA4282	128548	128933		Zv8_NA6689	1363	2625		Zv8_NA7823	153571	154032
chr16	27439737	27442056		Zv8_NA4282	162904	164078		Zv8_NA6712	648	1262		Zv8_NA7908	141425	142017
chr16	27920306	27927388		Zv8_NA4286	13938	15936		Zv8_NA6723	4496	5132		Zv8_NA7982	26541	27220
chr16	28231849	28233812		Zv8_NA4286	18114	18934		Zv8_NA6814	9948	10535		Zv8_NA7982	34220	34929
chr16	28432262	28435269		Zv8_NA4286	23839	24978		Zv8_NA686	4050	4801		Zv8_NA7982	57334	58181
chr16	31403048	31406189		Zv8_NA4286	39083	39689		Zv8_NA687	1215	1912		Zv8_NA7982	65675	66265
chr16	31580180	31582150		Zv8_NA4286	64667	65276		Zv8_NA6927	3606	4250		Zv8_NA8034	40345	40847
chr16	32314608	32318429		Zv8_NA4286	71756	72364		Zv8_NA693	12170	12755		Zv8_NA8034	90632	91293
chr16	35497977	35499438		Zv8_NA4286	75346	76536		Zv8_NA697	2281	2624		Zv8_NA8034	155720	156287
chr16	37064544	37069573		Zv8_NA4286	94117	94450		Zv8_NA6999	3314	4217		Zv8_NA8135	1	907
chr16	38422367	38423606		Zv8_NA4302	10576	11517		Zv8_NA7005	1194	1632		Zv8_NA8209	25624	26304
chr16	39631513	39633494		Zv8_NA4311	6753	7346		Zv8_NA7005	5652	6480		Zv8_NA8209	56346	57258
chr16	39699908	39702088		Zv8_NA4351	1976	2452		Zv8_NA7044	186	506		Zv8_NA8209	58931	59495
chr16	39787132	39789923		Zv8_NA4353	11306	12003		Zv8_NA7055	2767	3309		Zv8_NA8209	109349	110129
chr16	40068722	40070409		Zv8_NA4366	6891	7883		Zv8_NA713	1	935		Zv8_NA8209	114432	114981
chr16	40181492	40183368		Zv8_NA4370	55531	56398		Zv8_NA714	8185	8516		Zv8_NA8209	141190	142214
chr16	40366193	40367730		Zv8_NA4370	59539	60538		Zv8_NA7253	53893	54769		Zv8_NA8258	1451	2004
chr16	41047940	41050744		Zv8_NA4370	62344	62922		Zv8_NA7253	68770	69226		Zv8_NA8304	6126	6725
chr16	41218694	41220734		Zv8_NA4370	92705	93426		Zv8_NA7265	1546	2321		Zv8_NA831	34930	35430
chr16	44227714	44230183		Zv8_NA4370	94847	96070		Zv8_NA7265	4241	4761		Zv8_NA8325	3257	3737
chr16	44818026	44820068		Zv8_NA4370	99597	100033		Zv8_NA7265	7486	8162		Zv8_NA835	14128	14691
chr16	44928149	44929982		Zv8_NA4370	106007	106915		Zv8_NA7271	20624	21724		Zv8_NA8350	158512	159069
chr16	47637341	47639409		Zv8_NA4370	108450	110215		Zv8_NA7271	30226	30571		Zv8_NA8350	169623	171179
chr16	48487165	48488474		Zv8_NA4370	178707	179184		Zv8_NA7319	4818	5339		Zv8_NA8367	19943	20571
chr16	50434534	50436465		Zv8_NA4370	181510	182423		Zv8_NA7330	75050	75500		Zv8_NA8367	23005	23504
chr16	51384258	51389304		Zv8_NA4370	186801	188171		Zv8_NA736	102183	102788		Zv8_NA841	13284	14020
chr17	4006975	4009709		Zv8_NA4370	193770	196246		Zv8_NA7390	4504	4818		Zv8_NA8417	1041	1505
chr17	4411661	4413530		Zv8_NA4370	230274	230574		Zv8_NA74	20462	21436		Zv8_NA8417	19607	20327
chr17	4682547	4684358		Zv8_NA4370	276133	276693		Zv8_NA7415	466	896		Zv8_NA8485	22057	22605
chr17	7150118	7152792		Zv8_NA4379	1116	1838		Zv8_NA7447	2792	3443		Zv8_NA8495	10257	10761
chr17	7210621	7212562		Zv8_NA4383	24158	24554		Zv8_NA7447	5158	5604		Zv8_NA8583	29222	29894
chr17	9456843	9458683		Zv8_NA4385	7305	9326		Zv8_NA7513	1	677		Zv8_NA8583	43762	44363
chr17	10623552	10625282		Zv8_NA4392	29729	30052		Zv8_NA7513	73592	76266		Zv8_NA8666	9967	10544
chr17	11741360	11743114		Zv8_NA4398	5600	6321		Zv8_NA7513	77237	77684		Zv8_NA8763	71487	72015
chr17	11903480	11905596		Zv8_NA4398	14824	15293		Zv8_NA7520	7991	9549		Zv8_NA8792	20785	21767
chr17	12403577	12407177		Zv8_NA4408	71476	72448		Zv8_NA753	17443	17818		Zv8_NA8792	71273	72006
chr17	13816135	13817724		Zv8_NA4418	16235	18677		Zv8_NA7562	9235	10052		Zv8_NA8792	109914	110748
chr17	13914985	13917270		Zv8_NA4449	1480	1742		Zv8_NA7562	33838	34468		Zv8_NA8792	113176	113707
chr17	14091401	14094508		Zv8_NA4460	10678	11105		Zv8_NA7574	20681	21219		Zv8_NA880	5121	5589
chr17	16573432	16575363		Zv8_NA4460	14549	16028		Zv8_NA7681	2828	4228		Zv8_NA885	4046	4590
chr17	17894599	17904118		Zv8_NA4460	18907	19277		Zv8_NA7681	6777	7263		Zv8_NA9	5921	7431
chr17	18595457	18597071		Zv8_NA4475	12266	12764		Zv8_NA7681	10006	10638		Zv8_NA9002	19499	20030
chr17	18847626	18849853		Zv8_NA4480	501	1498		Zv8_NA7712	73473	73988		Zv8_NA9002	110754	111643
chr17	19004254	19005696		Zv8_NA4480	1801	2169		Zv8_NA7712	173316	173693		Zv8_NA9002	116911	118674
chr17	19283195	19287124		Zv8_NA4489	29253	30439		Zv8_NA7717	153	640		Zv8_NA9002	124139	124676
chr17	19320893	19323276		Zv8_NA4490	35901	37726		Zv8_NA7823	9949	11635		Zv8_NA9076	18377	19140
chr17	20087141	20089989		Zv8_NA4490	39835	42138		Zv8_NA7823	30921	31501		Zv8_NA9110	19033	19876
chr17	20835270	20838075		Zv8_NA4490	48125	48940		Zv8_NA7823	36813	37194		Zv8_NA9308	28302	29523
chr17	21104202	21106850		Zv8_NA4490	52716	53884		Zv8_NA7823	47045	48581		Zv8_NA941	22042	23111
chr17	21935097	21941583		Zv8_NA4490	59767	61710		Zv8_NA7823	101878	102623		Zv8_NA946	27857	28697
chr17	22165527	22168072		Zv8_NA4490	64968	66656		Zv8_NA7823	109322	109712		Zv8_NA946	141941	142406
chr17	23261628	23263967		Zv8_NA4490	69185	69681		Zv8_NA7823	110103	110478		Zv8_NA9477	1135	1864
chr17	23666751	23670045		Zv8_NA4501	12692	13076		Zv8_NA7823	112761	113261		Zv8_NA9503	907	1870
chr17	23944128	23945965		Zv8_NA4501	13353	14629		Zv8_NA7823	129691	131200		Zv8_NA952	12245	13108
chr17	24121320	24123497		Zv8_NA4532	44916	45336		Zv8_NA7823	153547	154053		Zv8_NA9669	21844	22574
chr17	25081315	25083619		Zv8_NA4532	46801	47220		Zv8_NA7823	166806	167619		Zv8_NA9669	40196	40737
chr17	25179846	25184255		Zv8_NA4532	58486	59121		Zv8_NA7908	175923	176828		Zv8_NA9736	118970	119541
chr17	25700759	25702714		Zv8_NA4540	46632	47012		Zv8_NA7925	375	803		Zv8_NA9839	12062	12733
chr17	26701467	26702809		Zv8_NA4542	48560	49015		Zv8_NA7982	21093	22148		Zv8_NA9852	40749	41584
chr17	27200758	27202571		Zv8_NA4561	31208	31866		Zv8_NA7982	24453	24881		Zv8_scaffold2954	186088	186491
chr17	27204514	27206937		Zv8_NA4561	83834	84150		Zv8_NA7982	26089	26630		Zv8_scaffold2958	40850	41504
chr17	27493000	27494705		Zv8_NA4561	88840	91793		Zv8_NA7982	41356	41766		Zv8_scaffold2958	47436	48147
chr17	27498052	27502535		Zv8_NA4561	93780	96734		Zv8_NA7982	42030	42503		Zv8_scaffold2958	59434	60777
chr17	27857123	27860189		Zv8_NA4561	100240	101905		Zv8_NA7982	42887	43202		Zv8_scaffold2959	224321	225066
chr17	27905180	27907043		Zv8_NA4561	104416	105680		Zv8_NA7982	53923	55216		Zv8_scaffold2959	268317	268876
chr17	27995238	27998516		Zv8_NA4561	115733	116572		Zv8_NA7982	65856	66519		Zv8_scaffold2960	6060	6620
chr17	28266865	28270342		Zv8_NA4561	133083	134669		Zv8_NA7986	8684	9377		Zv8_scaffold2960	60238	60775
chr17	28313111	28314971		Zv8_NA4570	5999	7353		Zv8_NA7986	13602	14423		Zv8_scaffold2960	67975	68463
chr17	28650430	28652471		Zv8_NA4579	82631	83533		Zv8_NA8034	14489	14908		Zv8_scaffold2960	76242	76746
chr17	28802290	28809018		Zv8_NA4581	8149	8554		Zv8_NA8034	90074	91084		Zv8_scaffold2961	40548	41082
chr17	31237157	31238326		Zv8_NA4607	88031	88481		Zv8_NA8135	1	654		Zv8_scaffold2963	24499	25208
chr17	31530728	31532652		Zv8_NA462	64036	64477		Zv8_NA8209	4883	5440		Zv8_scaffold2963	95386	96036
chr17	31705700	31708342		Zv8_NA4620	11469	12138		Zv8_NA8209	25826	26393		Zv8_scaffold2965	133144	133595
chr17	32109352	32112720		Zv8_NA4620	26615	27350		Zv8_NA8209	28966	29415		Zv8_scaffold2966	159014	159534
chr17	32180903	32182289		Zv8_NA4658	33482	34289		Zv8_NA8209	29689	30085		Zv8_scaffold2970	12092	12536
chr17	32912120	32915385		Zv8_NA4658	124257	124632		Zv8_NA8209	43726	44124		Zv8_scaffold2970	124441	124943
chr17	33190191	33191972		Zv8_NA4658	126481	127019		Zv8_NA8209	81644	82017		Zv8_scaffold2970	127862	128338
chr17	33348145	33351963		Zv8_NA4659	50348	51371		Zv8_NA8209	103495	104236		Zv8_scaffold2974	5263	5849
chr17	33704611	33706532		Zv8_NA4661	29116	29812		Zv8_NA8209	114385	114854		Zv8_scaffold2974	45971	46835
chr17	33807724	33810593		Zv8_NA4666	12111	12536		Zv8_NA8209	141295	141761		Zv8_scaffold2974	61007	61734
chr17	34349448	34352289		Zv8_NA4666	99294	100627		Zv8_NA8325	3013	3488		Zv8_scaffold2975	105619	106122
chr17	34429806	34432008		Zv8_NA4666	103689	104817		Zv8_NA8333	12478	13141		Zv8_scaffold2981	75573	75974
chr17	34735559	34737758		Zv8_NA4675	0	407		Zv8_NA8333	18821	19559		Zv8_scaffold2982	6563	7073
chr17	36098342	36100516		Zv8_NA4675	2065	2496		Zv8_NA8350	143488	143931		Zv8_scaffold2985	8331	8833
chr17	36391346	36394240		Zv8_NA4675	17850	18697		Zv8_NA8350	152839	153481		Zv8_scaffold2985	66264	66932
chr17	36460352	36462639		Zv8_NA4675	20267	20749		Zv8_NA8350	169422	171017		Zv8_scaffold2989	32247	33178
chr17	39681606	39683198		Zv8_NA4676	89568	90245		Zv8_NA8350	190657	191170		Zv8_scaffold2991	127880	128429
chr17	39715251	39718628		Zv8_NA4688	66409	68515		Zv8_NA8367	7751	8157		Zv8_scaffold2998	57079	57631
chr17	41263026	41264580		Zv8_NA4688	104270	104690		Zv8_NA845	8496	9445		Zv8_scaffold3005	31112	31794
chr17	43668720	43671230		Zv8_NA4688	135970	136897		Zv8_NA845	23795	24289		Zv8_scaffold3009	146832	147402
chr17	43720582	43722467		Zv8_NA4688	160116	160610		Zv8_NA8491	32739	33324		Zv8_scaffold3011	160340	160793
chr17	44558993	44561553		Zv8_NA4692	3667	4912		Zv8_NA8563	11620	11931		Zv8_scaffold3011	165443	166031
chr17	44566090	44567087		Zv8_NA4692	6678	7469		Zv8_NA8587	350	1579		Zv8_scaffold3013	14293	14799
chr17	44575386	44576585		Zv8_NA4756	84489	85275		Zv8_NA8666	14631	16212		Zv8_scaffold3013	114714	115588
chr17	44627371	44630248		Zv8_NA4756	86514	87459		Zv8_NA868	30686	31597		Zv8_scaffold3015	136901	137443
chr17	45100266	45102472		Zv8_NA4763	39217	39571		Zv8_NA8792	14259	14780		Zv8_scaffold3016	430765	431529
chr17	45692298	45694295		Zv8_NA4779	39272	39771		Zv8_NA8792	24530	25037		Zv8_scaffold3016	460196	461000
chr17	47348906	47351099		Zv8_NA4790	3058	3751		Zv8_NA8792	25248	26256		Zv8_scaffold3020	81274	81958
chr18	286016	288163		Zv8_NA4798	231244	231953		Zv8_NA8792	27990	29582		Zv8_scaffold3020	232802	233396
chr18	1786573	1788067		Zv8_NA4811	78527	79408		Zv8_NA8792	62561	63798		Zv8_scaffold3021	54114	55081
chr18	4156325	4158761		Zv8_NA4819	249548	249986		Zv8_NA8792	64752	65407		Zv8_scaffold3022	164129	164637
chr18	4687201	4689132		Zv8_NA4819	289272	289929		Zv8_NA8792	109792	110737		Zv8_scaffold3024	73370	73993
chr18	4689731	4692660		Zv8_NA482	4762	5329		Zv8_NA8792	116688	117780		Zv8_scaffold3024	137702	138251
chr18	7312802	7314730		Zv8_NA482	10970	11673		Zv8_NA8830	144865	145531		Zv8_scaffold3025	69055	70013
chr18	8572987	8575121		Zv8_NA4845	182214	183584		Zv8_NA9076	21130	21471		Zv8_scaffold3025	106959	107929
chr18	8680673	8682497		Zv8_NA4868	872	1140		Zv8_NA9110	3972	4698		Zv8_scaffold3025	137029	137622
chr18	11303449	11306078		Zv8_NA4897	11390	14086		Zv8_NA9110	10253	10744		Zv8_scaffold3025	162340	163051
chr18	11318302	11320905		Zv8_NA4900	17205	18401		Zv8_NA9128	22823	23562		Zv8_scaffold3025	177011	178265
chr18	11329329	11331364		Zv8_NA4918	112571	113464		Zv8_NA93	11241	11674		Zv8_scaffold3025	227785	228665
chr18	13212821	13214492		Zv8_NA4973	3413	3856		Zv8_NA9308	28594	29230		Zv8_scaffold3025	233958	235673
chr18	13823983	13826002		Zv8_NA4983	50628	51601		Zv8_NA9347	11783	12665		Zv8_scaffold3025	249864	252266
chr18	14550145	14551914		Zv8_NA4983	74945	75414		Zv8_NA946	27943	28377		Zv8_scaffold3025	263390	264181
chr18	14581626	14584475		Zv8_NA4986	76884	78281		Zv8_NA9477	1137	1846		Zv8_scaffold3025	274363	274919
chr18	15303310	15306132		Zv8_NA4986	79535	80012		Zv8_NA9503	474	1634		Zv8_scaffold3025	533364	533981
chr18	15311477	15313438		Zv8_NA5034	37456	38691		Zv8_NA952	12206	12655		Zv8_scaffold3025	569766	570954
chr18	15356069	15358124		Zv8_NA5034	39155	39779		Zv8_NA9698	1551	2351		Zv8_scaffold3025	587364	588245
chr18	15371917	15373553		Zv8_NA5054	22745	24175		Zv8_NA9813	9079	9515		Zv8_scaffold3025	600849	601477
chr18	15971360	15973327		Zv8_NA5057	10664	11253		Zv8_NA9839	61116	61456		Zv8_scaffold3025	604204	604905
chr18	16055942	16057434		Zv8_NA5077	1546	1857		Zv8_NA9840	1779	2079		Zv8_scaffold3025	621369	622279
chr18	16685476	16687721		Zv8_NA5093	4387	4998		Zv8_scaffold2952	67434	67807		Zv8_scaffold3025	627909	628659
chr18	16712964	16714398		Zv8_NA5093	10332	11582		Zv8_scaffold2958	59537	60427		Zv8_scaffold3025	630046	630665
chr18	17084962	17086472		Zv8_NA5124	3131	4401		Zv8_scaffold2959	59842	60132		Zv8_scaffold3025	653131	654001
chr18	18865673	18866916		Zv8_NA513	69992	70504		Zv8_scaffold2960	54971	55304		Zv8_scaffold3026	9082	9784
chr18	19288023	19289800		Zv8_NA513	114057	114839		Zv8_scaffold2960	55542	56329		Zv8_scaffold3026	21962	22897
chr18	19627899	19629908		Zv8_NA5200	22060	23237		Zv8_scaffold2960	56579	57337		Zv8_scaffold3026	78867	79429
chr18	20508941	20512107		Zv8_NA5209	13662	14979		Zv8_scaffold2960	60818	61401		Zv8_scaffold3026	115165	115717
chr18	20523375	20524885		Zv8_NA5209	23832	24180		Zv8_scaffold2960	66414	69174		Zv8_scaffold3026	132707	133274
chr18	20530617	20536362		Zv8_NA5209	27937	28678		Zv8_scaffold2960	75552	76621		Zv8_scaffold3026	188166	188716
chr18	20628949	20635620		Zv8_NA5209	30810	31319		Zv8_scaffold2960	76827	77374		Zv8_scaffold3026	209296	209645
chr18	20754671	20757024		Zv8_NA5209	37785	39050		Zv8_scaffold2960	81424	82408		Zv8_scaffold3026	220371	220975
chr18	22187167	22188617		Zv8_NA5209	40323	40690		Zv8_scaffold2960	82757	85192		Zv8_scaffold3027	12436	12973
chr18	22566853	22568260		Zv8_NA5209	40960	44822		Zv8_scaffold2960	85728	86495		Zv8_scaffold3027	25037	25784
chr18	22974686	22979353		Zv8_NA5209	49031	50164		Zv8_scaffold2960	87238	87753		Zv8_scaffold3028	179498	180032
chr18	23025660	23027256		Zv8_NA5209	51040	53030		Zv8_scaffold2962	89733	90167		Zv8_scaffold3028	428503	429235
chr18	23324039	23325371		Zv8_NA5209	61723	62579		Zv8_scaffold2965	76939	77626		Zv8_scaffold3028	438279	438917
chr18	23362593	23364468		Zv8_NA5209	63960	66821		Zv8_scaffold2968	124911	125648		Zv8_scaffold3028	472719	473281
chr18	24296619	24299651		Zv8_NA5209	72118	73262		Zv8_scaffold2972	113022	113403		Zv8_scaffold3029	56038	57304
chr18	24313176	24314930		Zv8_NA5209	74842	75684		Zv8_scaffold2974	41873	42840		Zv8_scaffold3029	217589	218468
chr18	24325098	24327704		Zv8_NA5209	149462	150181		Zv8_scaffold2974	46066	46520		Zv8_scaffold3029	229646	230275
chr18	25896464	25897860		Zv8_NA5212	1663	2368		Zv8_scaffold2975	21854	22208		Zv8_scaffold3029	238944	239842
chr18	28069760	28071826		Zv8_NA5218	703	1243		Zv8_scaffold2985	49875	51417		Zv8_scaffold3029	254264	254937
chr18	28868985	28871240		Zv8_NA5218	19514	19974		Zv8_scaffold2985	63808	64402		Zv8_scaffold3029	267009	267363
chr18	28999129	29000585		Zv8_NA5218	20763	23148		Zv8_scaffold2985	174682	175184		Zv8_scaffold3029	288915	290076
chr18	29798419	29800414		Zv8_NA5218	24552	24883		Zv8_scaffold2994	56660	57192		Zv8_scaffold3029	300259	300722
chr18	33473061	33474500		Zv8_NA5218	27369	28973		Zv8_scaffold2994	59688	60049		Zv8_scaffold3029	309718	310658
chr18	33743770	33745682		Zv8_NA5222	64	912		Zv8_scaffold2998	53175	53733		Zv8_scaffold3032	16879	17598
chr18	33866977	33868550		Zv8_NA5228	7244	8194		Zv8_scaffold2998	56933	57469		Zv8_scaffold3032	60241	60801
chr18	36027376	36029059		Zv8_NA5228	24543	25603		Zv8_scaffold2998	82464	82976		Zv8_scaffold3032	130442	131022
chr18	36382435	36385169		Zv8_NA5228	28550	28955		Zv8_scaffold2998	105179	105832		Zv8_scaffold3032	137917	138371
chr18	36401690	36404065		Zv8_NA5256	2	392		Zv8_scaffold2998	113397	113989		Zv8_scaffold3032	150145	151860
chr18	36858795	36860415		Zv8_NA5278	12086	12463		Zv8_scaffold2998	122625	123812		Zv8_scaffold3032	157197	157889
chr18	37432047	37435731		Zv8_NA5278	12669	12959		Zv8_scaffold3000	124705	125368		Zv8_scaffold3033	105228	105783
chr18	37451076	37453900		Zv8_NA5303	35	649		Zv8_scaffold3003	9565	9921		Zv8_scaffold3033	178190	178565
chr18	37602667	37605370		Zv8_NA5308	3950	4367		Zv8_scaffold3013	13499	13746		Zv8_scaffold3034	192006	192560
chr18	39825167	39827231		Zv8_NA5310	39632	41279		Zv8_scaffold3016	417161	417678		Zv8_scaffold3037	16297	16880
chr18	39829057	39830612		Zv8_NA5313	4358	4893		Zv8_scaffold3016	452339	452852		Zv8_scaffold3041	160344	160954
chr18	40141457	40143503		Zv8_NA5323	8171	8795		Zv8_scaffold3016	459954	460926		Zv8_scaffold3041	191290	192180
chr18	40147615	40150173		Zv8_NA5323	26149	27530		Zv8_scaffold3017	12726	13781		Zv8_scaffold3041	338398	339033
chr18	40450427	40452342		Zv8_NA5336	28255	29098		Zv8_scaffold3020	110551	111090		Zv8_scaffold3041	405057	406218
chr18	41869328	41871575		Zv8_NA5379	11172	13476		Zv8_scaffold3020	134379	134735		Zv8_scaffold3041	432752	433237
chr18	41880214	41882387		Zv8_NA5379	17226	18196		Zv8_scaffold3021	68741	69376		Zv8_scaffold3042	115059	117640
chr18	43034174	43035978		Zv8_NA5384	5430	5825		Zv8_scaffold3025	43283	44095		Zv8_scaffold3042	118513	120668
chr18	43393567	43395027		Zv8_NA5408	1040	1885		Zv8_scaffold3025	119096	119815		Zv8_scaffold3045	13260	13924
chr18	43444751	43446303		Zv8_NA5455	2545	2781		Zv8_scaffold3025	189617	189971		Zv8_scaffold3045	30699	31365
chr18	45377648	45379664		Zv8_NA5455	6042	8014		Zv8_scaffold3025	194220	194984		Zv8_scaffold3047	23073	23738
chr18	46503015	46504801		Zv8_NA5465	17701	18521		Zv8_scaffold3025	222742	223408		Zv8_scaffold3047	97597	98188
chr18	46826257	46829047		Zv8_NA5469	10476	11808		Zv8_scaffold3025	226165	226663		Zv8_scaffold3050	108056	108616
chr18	47734943	47736634		Zv8_NA5469	48954	49231		Zv8_scaffold3025	228060	228450		Zv8_scaffold3050	115527	116042
chr18	48139363	48140710		Zv8_NA5536	63424	64849		Zv8_scaffold3025	235943	236862		Zv8_scaffold3050	309846	310549
chr19	919091	921240		Zv8_NA5536	66068	66877		Zv8_scaffold3025	249792	251505		Zv8_scaffold3054	147678	148246
chr19	1039571	1041843		Zv8_NA5536	73578	74782		Zv8_scaffold3025	263104	263659		Zv8_scaffold3055	12533	13219
chr19	1232727	1234401		Zv8_NA5536	79119	80500		Zv8_scaffold3025	587547	588158		Zv8_scaffold3056	138913	139503
chr19	3735272	3736812		Zv8_NA5552	1467	2413		Zv8_scaffold3025	646973	647318		Zv8_scaffold3057	31992	32601
chr19	4853731	4856100		Zv8_NA5552	11223	11993		Zv8_scaffold3025	653435	653853		Zv8_scaffold3057	92033	92605
chr19	5481229	5484860		Zv8_NA5573	6952	7393		Zv8_scaffold3025	685855	686578		Zv8_scaffold3057	106319	107093
chr19	5991287	5993031		Zv8_NA5589	0	209		Zv8_scaffold3025	693895	694418		Zv8_scaffold3060	6759	8096
chr19	7145752	7151556		Zv8_NA5589	31711	32101		Zv8_scaffold3026	21840	22502		Zv8_scaffold3060	30836	31249
chr19	8177446	8180689		Zv8_NA5599	8132	9020		Zv8_scaffold3026	56071	56568		Zv8_scaffold3060	55541	56203
chr19	8633153	8635659		Zv8_NA5599	9900	10996		Zv8_scaffold3026	108254	108875		Zv8_scaffold3060	183764	184320
chr19	9149930	9151721		Zv8_NA5599	16610	17055		Zv8_scaffold3026	205882	206292		Zv8_scaffold3062	436612	437026
chr19	10535184	10538330		Zv8_NA5604	58048	58550		Zv8_scaffold3026	209450	209748		Zv8_scaffold3063	40419	40952
chr19	11123599	11125051		Zv8_NA5605	25513	26170		Zv8_scaffold3027	306858	307131		Zv8_scaffold3066	224735	225277
chr19	11194102	11196971		Zv8_NA5623	7491	8551		Zv8_scaffold3027	307347	307710		Zv8_scaffold3071	252995	253536
chr19	11787634	11788893		Zv8_NA5624	44250	44545		Zv8_scaffold3028	18191	18693		Zv8_scaffold3086	24251	25142
chr19	11802215	11804822		Zv8_NA5624	97188	97689		Zv8_scaffold3028	111097	112081		Zv8_scaffold3086	40960	41497
chr19	13639842	13641869		Zv8_NA5626	25788	26391		Zv8_scaffold3028	120265	121074		Zv8_scaffold3086	44036	44517
chr19	14091675	14093194		Zv8_NA574	4342	4696		Zv8_scaffold3028	137616	138335		Zv8_scaffold3086	172533	173001
chr19	14161873	14163735		Zv8_NA578	5370	6491		Zv8_scaffold3028	413425	414369		Zv8_scaffold3088	18434	19261
chr19	15522588	15524136		Zv8_NA5880	3228	3662		Zv8_scaffold3028	419374	420056		Zv8_scaffold3088	51861	52389
chr19	15535289	15537349		Zv8_NA5912	13377	13816		Zv8_scaffold3029	52786	53517		Zv8_scaffold3088	67532	68152
chr19	15624195	15626531		Zv8_NA594	19828	21351		Zv8_scaffold3029	55774	57484		Zv8_scaffold3088	79956	80731
chr19	15627791	15634764		Zv8_NA594	25887	26578		Zv8_scaffold3029	58005	58390		Zv8_scaffold3088	85682	86685
chr19	15660177	15662724		Zv8_NA5956	148	1022		Zv8_scaffold3029	63029	63447		Zv8_scaffold3091	29241	29820
chr19	15743265	15745147		Zv8_NA5982	3463	7503		Zv8_scaffold3029	205912	206300		Zv8_scaffold3091	122561	123091
chr19	15884072	15885530		Zv8_NA5992	68	645		Zv8_scaffold3029	206696	207137		Zv8_scaffold3091	163375	163919
chr19	15901786	15904418		Zv8_NA5994	18080	18773		Zv8_scaffold3029	278601	279000		Zv8_scaffold3091	175217	175720
chr19	16037176	16038826		Zv8_NA6030	0	928		Zv8_scaffold3029	282003	283417		Zv8_scaffold3091	178047	178761
chr19	17000471	17002060		Zv8_NA6030	1683	3119		Zv8_scaffold3029	286860	287715		Zv8_scaffold3091	223802	224340
chr19	18306169	18308645		Zv8_NA6036	46459	46953		Zv8_scaffold3029	299718	301091		Zv8_scaffold3091	230302	231447
chr19	20340864	20343971		Zv8_NA6036	49576	49957		Zv8_scaffold3029	302828	303336		Zv8_scaffold3094	49233	50561
chr19	20620861	20622977		Zv8_NA6036	57695	58544		Zv8_scaffold3029	309714	310124		Zv8_scaffold3097	76777	77415
chr19	20692804	20695201		Zv8_NA6036	237488	238385		Zv8_scaffold3029	326747	327180		Zv8_scaffold3103	62812	63355
chr19	21384663	21386158		Zv8_NA6036	396739	398656		Zv8_scaffold3032	16797	17210		Zv8_scaffold3103	88793	89273
chr19	21392510	21394716		Zv8_NA6076	5159	5663		Zv8_scaffold3032	22086	23321		Zv8_scaffold3103	115477	116062
chr19	21435211	21436299		Zv8_NA6076	124849	125361		Zv8_scaffold3032	25772	28411		Zv8_scaffold3103	211742	212406
chr19	24068376	24070547		Zv8_NA6076	132608	133157		Zv8_scaffold3032	74374	74759		Zv8_scaffold3103	237162	237678
chr19	24773250	24775000		Zv8_NA6078	19035	19578		Zv8_scaffold3032	89750	90173		Zv8_scaffold3105	101151	103149
chr19	25145274	25147853		Zv8_NA6092	8877	10418		Zv8_scaffold3032	112451	113072		Zv8_scaffold3105	117937	118329
chr19	25194109	25196754		Zv8_NA6103	10039	11161		Zv8_scaffold3032	144935	146184		Zv8_scaffold3105	142676	143463
chr19	25735313	25737496		Zv8_NA6114	7968	8409		Zv8_scaffold3032	153531	154423		Zv8_scaffold3106	34922	35438
chr19	26212120	26213529		Zv8_NA6114	24095	25006		Zv8_scaffold3032	179695	180159		Zv8_scaffold3106	133442	133979
chr19	26867714	26870515		Zv8_NA6114	30913	32211		Zv8_scaffold3032	197879	198488		Zv8_scaffold3106	202722	203684
chr19	26929212	26931617		Zv8_NA6114	39594	41849		Zv8_scaffold3032	219849	220408		Zv8_scaffold3106	237914	238520
chr19	27136295	27139275		Zv8_NA6122	32597	32969		Zv8_scaffold3033	87572	87930		Zv8_scaffold3106	321807	322828
chr19	27214203	27216710		Zv8_NA6134	313	1040		Zv8_scaffold3034	167100	167684		Zv8_scaffold3106	347560	348025
chr19	28456919	28458417		Zv8_NA6147	847	1248		Zv8_scaffold3034	174030	174549		Zv8_scaffold3107	144755	145662
chr19	28636380	28638310		Zv8_NA6158	20114	21269		Zv8_scaffold3035	329149	329936		Zv8_scaffold3107	154651	155311
chr19	28680867	28682373		Zv8_NA6185	148	926		Zv8_scaffold3037	37454	37886		Zv8_scaffold3112	153342	153886
chr19	29953204	29955433		Zv8_NA6193	1161	1895		Zv8_scaffold3038	160749	161209		Zv8_scaffold3112	176114	176689
chr19	30246024	30249310		Zv8_NA6260	95	1264		Zv8_scaffold3041	89735	90489		Zv8_scaffold3112	280581	281128
chr19	30262152	30266572		Zv8_NA6288	7813	9764		Zv8_scaffold3041	108528	108845		Zv8_scaffold3112	289727	290351
chr19	30462834	30465280		Zv8_NA6294	81769	82192		Zv8_scaffold3041	126171	127541		Zv8_scaffold3114	27488	27974
chr19	32348378	32353100		Zv8_NA6334	36220	36924		Zv8_scaffold3041	291070	291413		Zv8_scaffold3114	128578	129048
chr19	32371291	32373444		Zv8_NA6356	18460	21001		Zv8_scaffold3041	295825	296137		Zv8_scaffold3114	194569	195089
chr19	32390020	32392127		Zv8_NA6356	26660	27989		Zv8_scaffold3041	306642	307167		Zv8_scaffold3115	68569	69113
chr19	32447081	32448556		Zv8_NA6356	36255	37515		Zv8_scaffold3041	398705	399011		Zv8_scaffold3117	90243	90818
chr19	32774456	32776939		Zv8_NA6356	42868	44551		Zv8_scaffold3041	405170	405559		Zv8_scaffold3117	140635	141142
chr19	34305571	34308970		Zv8_NA6356	57030	57614		Zv8_scaffold3047	154087	154466		Zv8_scaffold3117	422648	423236
chr19	37275901	37278585		Zv8_NA6356	92230	93394		Zv8_scaffold3048	31763	32226		Zv8_scaffold3119	168657	169316
chr19	37339276	37342259		Zv8_NA6356	97344	98811		Zv8_scaffold3049	307631	308017		Zv8_scaffold3121	17337	18046
chr19	37354703	37356247		Zv8_NA6361	53709	54037		Zv8_scaffold3050	187844	188259		Zv8_scaffold3121	37944	38848
chr19	38056590	38059079		Zv8_NA6361	56096	56442		Zv8_scaffold3050	323603	324465		Zv8_scaffold3121	80723	81384
chr19	38063862	38065562		Zv8_NA6361	57144	57937		Zv8_scaffold3052	156010	156391		Zv8_scaffold3121	145978	146505
chr19	38747412	38749275		Zv8_NA6422	36391	37363		Zv8_scaffold3054	37390	37647		Zv8_scaffold3121	194732	195262
chr19	38851921	38854190		Zv8_NA6468	11388	11771		Zv8_scaffold3054	100454	101132		Zv8_scaffold3121	196883	197744
chr19	40717642	40719638		Zv8_NA658	1986	2715		Zv8_scaffold3057	13902	15329		Zv8_scaffold3121	217839	218491
chr19	40962197	40963859		Zv8_NA6683	4068	4819		Zv8_scaffold3057	18600	19913		Zv8_scaffold3121	236584	237106
chr19	41552830	41554692		Zv8_NA6689	719	3236		Zv8_scaffold3057	29029	29537		Zv8_scaffold3123	140833	141710
chr19	42210119	42213817		Zv8_NA6723	7945	8681		Zv8_scaffold3057	34472	35137		Zv8_scaffold3123	156189	156866
chr19	43594982	43596850		Zv8_NA6731	1433	1856		Zv8_scaffold3057	40746	41078		Zv8_scaffold3123	301831	302691
chr19	44682722	44685054		Zv8_NA674	4681	5658		Zv8_scaffold3057	55291	56003		Zv8_scaffold3123	334218	334978
chr19	46021265	46024027		Zv8_NA6773	1741	2571		Zv8_scaffold3057	71532	72710		Zv8_scaffold3123	355258	355894
chr19	47758782	47760123		Zv8_NA6826	4835	5236		Zv8_scaffold3057	91845	92515		Zv8_scaffold3123	362011	363056
chr19	48460672	48462590		Zv8_NA687	1078	1963		Zv8_scaffold3057	138141	139276		Zv8_scaffold3125	26755	27697
chr2	1840794	1842092		Zv8_NA6927	3671	4392		Zv8_scaffold3060	126519	126945		Zv8_scaffold3127	95626	96408
chr2	2129760	2131886		Zv8_NA7005	5825	6210		Zv8_scaffold3062	368942	369548		Zv8_scaffold3127	122243	123078
chr2	5780705	5784780		Zv8_NA707	17073	17473		Zv8_scaffold3065	8867	9131		Zv8_scaffold3127	137914	138494
chr2	5924770	5930279		Zv8_NA713	238	962		Zv8_scaffold3066	207905	208849		Zv8_scaffold3127	162791	163151
chr2	6534992	6536927		Zv8_NA7130	18256	19621		Zv8_scaffold3066	251231	251563		Zv8_scaffold3127	167863	168424
chr2	6705456	6707029		Zv8_NA714	8103	8506		Zv8_scaffold3071	232926	233427		Zv8_scaffold3127	171917	172480
chr2	6790059	6792218		Zv8_NA7265	1513	2323		Zv8_scaffold3071	252589	253272		Zv8_scaffold3127	187761	188371
chr2	7077625	7079653		Zv8_NA7265	4612	5000		Zv8_scaffold3084	240519	240917		Zv8_scaffold3127	216092	216634
chr2	7551649	7553237		Zv8_NA7271	20393	22035		Zv8_scaffold3086	5837	6751		Zv8_scaffold3127	283500	283884
chr2	7644018	7646691		Zv8_NA7271	22801	23361		Zv8_scaffold3086	19491	19741		Zv8_scaffold3128	32754	33249
chr2	7705403	7707061		Zv8_NA7271	24524	25351		Zv8_scaffold3086	20040	20651		Zv8_scaffold3128	91026	91635
chr2	7749503	7754792		Zv8_NA7271	33991	35352		Zv8_scaffold3086	22370	22613		chr1	194127	194776
chr2	7850144	7851680		Zv8_NA7327	11930	12205		Zv8_scaffold3086	23786	25529		chr1	265869	266428
chr2	8072382	8074168		Zv8_NA7330	128188	128992		Zv8_scaffold3086	35277	35677		chr1	271315	272241
chr2	9704077	9705461		Zv8_NA7385	27476	27941		Zv8_scaffold3086	65471	66166		chr1	295864	296427
chr2	10597317	10599515		Zv8_NA7394	3	465		Zv8_scaffold3086	78178	78771		chr1	590677	591188
chr2	11360460	11363192		Zv8_NA7513	72989	75931		Zv8_scaffold3086	83427	84253		chr1	666217	666503
chr2	13222584	13223975		Zv8_NA7513	77104	77869		Zv8_scaffold3086	150285	150690		chr1	714803	715185
chr2	14113110	14115345		Zv8_NA7520	7388	9528		Zv8_scaffold3086	172531	172861		chr1	941662	942347
chr2	15117240	15118941		Zv8_NA7562	6504	8503		Zv8_scaffold3086	174940	175187		chr1	950701	951221
chr2	15463752	15466188		Zv8_NA7562	8887	9858		Zv8_scaffold3087	81037	81647		chr1	1259667	1260351
chr2	18635336	18639493		Zv8_NA7562	13902	14355		Zv8_scaffold3087	161646	162005		chr1	1734386	1734928
chr2	19023207	19024701		Zv8_NA757	16070	17794		Zv8_scaffold3087	205973	207071		chr1	1837708	1838236
chr2	19081542	19084351		Zv8_NA759	2505	3516		Zv8_scaffold3088	17971	19199		chr1	2436968	2437497
chr2	19319512	19324106		Zv8_NA7681	3429	3939		Zv8_scaffold3088	64660	65390		chr1	2439031	2439530
chr2	20212975	20215845		Zv8_NA7693	5598	6353		Zv8_scaffold3088	85457	86538		chr1	2443780	2444306
chr2	20624991	20626474		Zv8_NA7693	10475	11347		Zv8_scaffold3088	135451	135817		chr1	2614371	2615912
chr2	20969621	20971641		Zv8_NA7712	73504	74553		Zv8_scaffold3088	139390	139918		chr1	2617514	2618390
chr2	21532824	21535397		Zv8_NA7712	103148	103631		Zv8_scaffold3091	142333	143785		chr1	2689128	2689832
chr2	22794669	22798039		Zv8_NA7822	584	1300		Zv8_scaffold3091	161343	161751		chr1	2699129	2699670
chr2	22897685	22900126		Zv8_NA7823	36833	37931		Zv8_scaffold3091	178713	179145		chr1	2704960	2705496
chr2	24478097	24479596		Zv8_NA7823	47204	48962		Zv8_scaffold3091	181969	182414		chr1	2963834	2964340
chr2	25578939	25582133		Zv8_NA7823	59351	60994		Zv8_scaffold3091	183541	184389		chr1	3168677	3169211
chr2	25804061	25806059		Zv8_NA7823	61969	62818		Zv8_scaffold3091	217530	217993		chr1	3261834	3262397
chr2	25839126	25842256		Zv8_NA7823	66905	67802		Zv8_scaffold3091	243541	243869		chr1	3406299	3407069
chr2	25916458	25918900		Zv8_NA7823	68017	68889		Zv8_scaffold3091	245109	245495		chr1	3411506	3412050
chr2	26429182	26430340		Zv8_NA7823	72343	72889		Zv8_scaffold3091	249125	249543		chr1	3638798	3639562
chr2	26652756	26654911		Zv8_NA7823	129738	130647		Zv8_scaffold3094	84083	85046		chr1	3771182	3771823
chr2	26952534	26954815		Zv8_NA7880	7616	8072		Zv8_scaffold3099	54890	55408		chr1	3776597	3777160
chr2	27782949	27784919		Zv8_NA7908	175362	176832		Zv8_scaffold3099	79874	80442		chr1	3872313	3872826
chr2	28499643	28502550		Zv8_NA7908	195422	195955		Zv8_scaffold3099	110040	111064		chr1	3975854	3977239
chr2	28536679	28539345		Zv8_NA7963	667	1279		Zv8_scaffold3103	76590	76889		chr1	3980411	3980862
chr2	28710163	28712806		Zv8_NA7982	26768	27107		Zv8_scaffold3103	88754	89255		chr1	3984357	3987126
chr2	28727846	28729067		Zv8_NA8035	28699	29104		Zv8_scaffold3103	170522	170958		chr1	4027699	4028800
chr2	30104484	30106746		Zv8_NA8152	316	795		Zv8_scaffold3103	182408	182690		chr1	4238846	4239677
chr2	30149185	30150723		Zv8_NA8167	2468	3187		Zv8_scaffold3103	194604	195490		chr1	4278111	4278714
chr2	30162849	30164733		Zv8_NA8209	26473	26901		Zv8_scaffold3105	98961	104176		chr1	4475320	4475876
chr2	30170307	30172403		Zv8_NA8209	33806	34168		Zv8_scaffold3105	151307	151760		chr1	4677075	4677576
chr2	30197808	30199438		Zv8_NA8209	81527	82233		Zv8_scaffold3106	31896	32441		chr1	4735825	4737119
chr2	30225538	30227549		Zv8_NA8291	918	1480		Zv8_scaffold3106	51409	52364		chr1	4743472	4743901
chr2	30704558	30707256		Zv8_NA8306	695	1736		Zv8_scaffold3106	133454	133966		chr1	4835761	4836383
chr2	31042748	31045593		Zv8_NA8325	146	815		Zv8_scaffold3106	161581	162088		chr1	4860830	4861702
chr2	31062292	31066013		Zv8_NA8333	11034	13210		Zv8_scaffold3106	202096	203740		chr1	4895401	4895880
chr2	31083642	31088463		Zv8_NA8333	18777	19618		Zv8_scaffold3107	144234	145627		chr1	4898454	4899205
chr2	31120260	31122595		Zv8_NA835	3740	4519		Zv8_scaffold3112	274147	274455		chr1	4907283	4907945
chr2	31294337	31295633		Zv8_NA835	5629	7650		Zv8_scaffold3114	296577	296957		chr1	4947771	4948699
chr2	33385559	33387579		Zv8_NA8350	169900	170631		Zv8_scaffold3115	64497	64879		chr1	5017180	5017823
chr2	33787025	33789922		Zv8_NA8350	184171	184522		Zv8_scaffold3115	69559	69995		chr1	5023631	5024432
chr2	33821509	33827067		Zv8_NA8351	559	1101		Zv8_scaffold3117	422681	423046		chr1	5030223	5030687
chr2	33829420	33832429		Zv8_NA839	45	1100		Zv8_scaffold3117	555458	555844		chr1	5075323	5076048
chr2	33964414	33971029		Zv8_NA841	11241	12371		Zv8_scaffold3121	66811	67976		chr1	5097586	5098316
chr2	34127451	34128862		Zv8_NA841	13230	13597		Zv8_scaffold3121	71997	73406		chr1	5107988	5108608
chr2	35353716	35355923		Zv8_NA845	23960	24293		Zv8_scaffold3121	86820	87859		chr1	5204777	5205290
chr2	36800673	36803301		Zv8_NA8462	47007	47723		Zv8_scaffold3121	135868	136303		chr1	5327443	5327937
chr2	36916631	36918732		Zv8_NA8464	24300	24591		Zv8_scaffold3121	158055	159730		chr1	5751407	5751965
chr2	39830434	39834720		Zv8_NA8479	1525	2032		Zv8_scaffold3121	196758	197546		chr1	6482246	6483077
chr2	40095764	40098121		Zv8_NA8543	0	1190		Zv8_scaffold3121	203135	203721		chr1	6485232	6485632
chr2	40396486	40397808		Zv8_NA8563	19245	19989		Zv8_scaffold3123	117222	119231		chr1	6876794	6877285
chr2	40786024	40788215		Zv8_NA8567	0	664		Zv8_scaffold3123	125682	126134		chr1	7048567	7049129
chr2	41112447	41115791		Zv8_NA8583	14923	15343		Zv8_scaffold3123	150468	151688		chr1	7169980	7170599
chr2	41736980	41739193		Zv8_NA8587	0	1692		Zv8_scaffold3123	152707	153546		chr1	7661274	7661736
chr2	41857106	41858390		Zv8_NA8656	29703	30065		Zv8_scaffold3123	159564	160216		chr1	7883788	7884265
chr2	42400002	42401561		Zv8_NA8666	1851	2508		Zv8_scaffold3123	194899	195487		chr1	7997458	7997982
chr2	42559538	42561127		Zv8_NA8666	14343	16629		Zv8_scaffold3123	333886	335388		chr1	9411214	9411755
chr2	43356628	43359638		Zv8_NA8676	2423	3067		Zv8_scaffold3123	350348	351615		chr1	9478603	9479380
chr2	44332566	44334271		Zv8_NA8679	22338	22981		Zv8_scaffold3123	357446	358857		chr1	10036241	10036761
chr2	45591508	45594126		Zv8_NA8699	11982	12336		Zv8_scaffold3123	362265	363180		chr1	10251183	10251726
chr2	46554594	46557725		Zv8_NA8699	37345	37791		Zv8_scaffold3125	13878	15192		chr1	10257302	10257945
chr2	46696677	46698783		Zv8_NA8749	592	1501		Zv8_scaffold3125	24448	24812		chr1	10633680	10635012
chr2	48160306	48163419		Zv8_NA8792	24664	26004		Zv8_scaffold3125	32833	33309		chr1	10642185	10642703
chr2	49292677	49295570		Zv8_NA8792	28624	29624		Zv8_scaffold3127	29035	29576		chr1	10949083	10949668
chr2	49634293	49636386		Zv8_NA8792	62763	63197		Zv8_scaffold3127	44041	44860		chr1	11149662	11150240
chr2	53674492	53675820		Zv8_NA8792	71026	71801		Zv8_scaffold3127	122331	122768		chr1	11220088	11220788
chr2	54009303	54011681		Zv8_NA8830	49872	50262		Zv8_scaffold3127	143310	143901		chr1	11228093	11228721
chr2	56374504	56376159		Zv8_NA8830	124001	125346		Zv8_scaffold3127	172137	172583		chr1	11233037	11233904
chr2	57640652	57643179		Zv8_NA8830	130648	132265		Zv8_scaffold3127	187631	188504		chr1	11303608	11304073
chr20	1659878	1661137		Zv8_NA8830	144759	145917		chr1	183448	184285		chr1	11308033	11308606
chr20	1788728	1791098		Zv8_NA8830	154956	155881		chr1	194348	194868		chr1	11698123	11698995
chr20	2315054	2316623		Zv8_NA8864	2702	3440		chr1	267338	268574		chr1	12178314	12178874
chr20	3992646	3994486		Zv8_NA8876	326	741		chr1	374971	375457		chr1	12327562	12328198
chr20	5047896	5050525		Zv8_NA9002	27742	28160		chr1	626560	627080		chr1	12422335	12423534
chr20	5705003	5706601		Zv8_NA9002	37984	38721		chr1	628294	628725		chr1	12428089	12429204
chr20	5865611	5867419		Zv8_NA9002	43790	45139		chr1	678492	679293		chr1	12430409	12430937
chr20	6929008	6931304		Zv8_NA9002	47829	48197		chr1	691958	692882		chr1	12446075	12446702
chr20	6935810	6940151		Zv8_NA9002	59511	60682		chr1	699036	700381		chr1	12448376	12448953
chr20	7367186	7372208		Zv8_NA9002	61322	62642		chr1	701790	702476		chr1	12460621	12461176
chr20	7550569	7552287		Zv8_NA9002	69195	70081		chr1	743834	744371		chr1	12512239	12512933
chr20	9164553	9166756		Zv8_NA9002	110895	111482		chr1	762745	763321		chr1	12523145	12523607
chr20	9893844	9894905		Zv8_NA9002	114405	115098		chr1	781281	781918		chr1	12542588	12543149
chr20	16755042	16757390		Zv8_NA9002	115588	118401		chr1	900439	900937		chr1	12574440	12575489
chr20	17373134	17374756		Zv8_NA9002	146020	146778		chr1	921637	922206		chr1	12755859	12756427
chr20	19074407	19075810		Zv8_NA9009	5807	6126		chr1	925411	925926		chr1	12891569	12892142
chr20	19293988	19296672		Zv8_NA901	33338	33715		chr1	941648	942285		chr1	13149281	13149729
chr20	19675705	19677238		Zv8_NA9110	210	1547		chr1	1004437	1004974		chr1	13313529	13314068
chr20	20028594	20030816		Zv8_NA9110	6397	7451		chr1	1051820	1052911		chr1	14036042	14036527
chr20	20228330	20229997		Zv8_NA9110	12595	13622		chr1	1090883	1091439		chr1	14047082	14047635
chr20	20653207	20655774		Zv8_NA9122	59	499		chr1	1221899	1222809		chr1	14359065	14359672
chr20	20813440	20816460		Zv8_NA9122	1164	1670		chr1	1229865	1230494		chr1	14904228	14904741
chr20	20858649	20860315		Zv8_NA9159	2261	2527		chr1	1485896	1486491		chr1	14923454	14924164
chr20	20860566	20863046		Zv8_NA9287	0	57		chr1	1496142	1496659		chr1	15028521	15029242
chr20	21288207	21291074		Zv8_NA9290	0	603		chr1	1920472	1921059		chr1	15039840	15040417
chr20	21684022	21685585		Zv8_NA9293	0	774		chr1	1978748	1979273		chr1	15046943	15047457
chr20	22287877	22290435		Zv8_NA9308	54411	56985		chr1	2425004	2426556		chr1	15067668	15068144
chr20	22291019	22296920		Zv8_NA9336	9629	10037		chr1	2431042	2432409		chr1	15273907	15274581
chr20	22411025	22414465		Zv8_NA9379	32	1298		chr1	2433324	2433805		chr1	15757149	15757655
chr20	22817720	22819648		Zv8_NA941	21929	23336		chr1	2446146	2447044		chr1	15767842	15768896
chr20	23618294	23621170		Zv8_NA9416	1275	1538		chr1	2448021	2449145		chr1	15958692	15959232
chr20	24188064	24189701		Zv8_NA9417	76038	76564		chr1	2610405	2611492		chr1	16010379	16011005
chr20	24266371	24268626		Zv8_NA9495	1174	2411		chr1	2612706	2613508		chr1	16135014	16135526
chr20	24593655	24596781		Zv8_NA9503	473	1943		chr1	2617279	2618719		chr1	16138959	16139546
chr20	24951009	24953161		Zv8_NA956	6738	7226		chr1	2622666	2623909		chr1	16159234	16159753
chr20	25315476	25317557		Zv8_NA9565	9392	11045		chr1	2633282	2633913		chr1	16386635	16387340
chr20	25591389	25592881		Zv8_NA9621	1303	1670		chr1	2673484	2674647		chr1	16392571	16393203
chr20	27730992	27734284		Zv8_NA9624	1032	1351		chr1	2696910	2697376		chr1	16426073	16426664
chr20	27868515	27870952		Zv8_NA9698	5222	5679		chr1	2806914	2807383		chr1	16533513	16534178
chr20	27899888	27902954		Zv8_NA9698	7716	8379		chr1	2985225	2986049		chr1	16729822	16730305
chr20	27937388	27940157		Zv8_NA9698	13073	14389		chr1	3262248	3262945		chr1	16790543	16791091
chr20	28036116	28038356		Zv8_NA9721	12777	13476		chr1	3264858	3265377		chr1	16811323	16812123
chr20	28329218	28331738		Zv8_NA9839	38285	39488		chr1	3626013	3626497		chr1	16825367	16826364
chr20	28376200	28378601		Zv8_NA9839	48492	49159		chr1	3763748	3764520		chr1	16832785	16833411
chr20	28460308	28463359		Zv8_NA9839	67978	68480		chr1	3776441	3778153		chr1	16834943	16836047
chr20	28531239	28533236		Zv8_NA9845	3938	4199		chr1	3787644	3788266		chr1	16838199	16838747
chr20	29563022	29564654		Zv8_NA9908	222	635		chr1	3872030	3873116		chr1	16869147	16870070
chr20	29802716	29806948		Zv8_NA993	0	426		chr1	3877132	3878281		chr1	17000613	17001159
chr20	29816170	29821936		Zv8_NA9961	0	552		chr1	3895229	3896179		chr1	17040486	17041164
chr20	30518894	30521142		Zv8_NA997	6899	7218		chr1	3899294	3900425		chr1	17045189	17046331
chr20	30732463	30735066		Zv8_NA997	9153	9601		chr1	3913935	3914400		chr1	17180906	17181437
chr20	30743098	30744432		Zv8_scaffold2950	40294	40960		chr1	3918863	3919388		chr1	17197255	17197952
chr20	30744600	30746242		Zv8_scaffold2951	37133	37584		chr1	3968940	3969697		chr1	17204545	17205227
chr20	31951329	31954762		Zv8_scaffold2958	40696	41736		chr1	3973557	3974861		chr1	17729323	17730038
chr20	33322787	33324569		Zv8_scaffold2958	42213	43039		chr1	3975602	3977411		chr1	18022367	18023307
chr20	33324890	33327600		Zv8_scaffold2958	56812	57441		chr1	3981837	3982968		chr1	18101104	18101689
chr20	34246285	34248091		Zv8_scaffold2958	70362	71476		chr1	3984274	3987146		chr1	18109521	18110107
chr20	35130686	35133352		Zv8_scaffold2958	239642	240009		chr1	3992383	3993113		chr1	18249707	18250912
chr20	35449882	35452685		Zv8_scaffold2959	20209	20802		chr1	4012397	4013556		chr1	18269318	18270012
chr20	36866557	36868613		Zv8_scaffold2959	59882	60219		chr1	4014690	4015080		chr1	18285207	18286983
chr20	36933349	36934884		Zv8_scaffold2960	22553	22990		chr1	4027546	4029170		chr1	18293942	18294528
chr20	36989711	36991147		Zv8_scaffold2960	36618	37575		chr1	4239018	4239589		chr1	18299480	18300033
chr20	37045488	37048083		Zv8_scaffold2960	39247	40691		chr1	4399618	4401650		chr1	18313552	18315757
chr20	37109208	37111603		Zv8_scaffold2960	54844	56330		chr1	4416657	4417232		chr1	18321187	18321722
chr20	37815879	37817647		Zv8_scaffold2960	56636	57271		chr1	4430492	4431150		chr1	18330045	18330579
chr20	38892595	38895488		Zv8_scaffold2960	57826	58958		chr1	4629530	4630239		chr1	18417358	18417848
chr20	40230381	40232617		Zv8_scaffold2960	60214	61781		chr1	4643044	4643566		chr1	18463727	18464290
chr20	40344594	40346600		Zv8_scaffold2960	63069	63394		chr1	4898840	4899445		chr1	18581283	18581803
chr20	40754102	40756210		Zv8_scaffold2960	66517	67242		chr1	4902141	4903185		chr1	18667179	18667714
chr20	41048699	41050569		Zv8_scaffold2960	69711	70869		chr1	4947800	4948750		chr1	19087978	19088993
chr20	41211862	41214062		Zv8_scaffold2960	81297	85386		chr1	5531262	5531817		chr1	19143018	19143681
chr20	41236778	41238278		Zv8_scaffold2960	85587	86400		chr1	5687248	5687819		chr1	19173798	19174408
chr20	42396473	42397900		Zv8_scaffold2962	89817	90402		chr1	5704643	5706406		chr1	19365191	19367226
chr20	44416607	44417977		Zv8_scaffold2965	31049	31654		chr1	5841122	5841671		chr1	19382442	19384118
chr20	45692889	45695031		Zv8_scaffold2966	104482	105337		chr1	5934857	5935871		chr1	19395453	19395910
chr20	47396331	47397831		Zv8_scaffold2966	155779	156441		chr1	6482439	6483049		chr1	19781491	19782044
chr20	47505563	47506957		Zv8_scaffold2968	32682	34268		chr1	6493560	6494371		chr1	19788277	19789011
chr20	47861164	47863563		Zv8_scaffold2968	122811	123581		chr1	6728306	6728924		chr1	19800042	19800642
chr20	50368909	50370459		Zv8_scaffold2968	125140	125777		chr1	7077780	7078269		chr1	20031520	20032076
chr21	912079	913966		Zv8_scaffold2972	16512	17082		chr1	7377026	7377795		chr1	20351862	20352301
chr21	2027267	2028757		Zv8_scaffold2972	21710	22527		chr1	7644343	7644802		chr1	20375879	20376476
chr21	3019648	3021412		Zv8_scaffold2972	26306	26751		chr1	7667028	7667552		chr1	20706312	20707405
chr21	4472029	4476836		Zv8_scaffold2972	111260	111789		chr1	7676933	7677513		chr1	20720938	20721442
chr21	7535116	7537642		Zv8_scaffold2975	105225	105918		chr1	7694390	7695143		chr1	21233994	21234620
chr21	7773398	7776756		Zv8_scaffold2977	32739	34405		chr1	7700896	7702058		chr1	21339877	21340706
chr21	7805336	7807341		Zv8_scaffold2979	67557	67922		chr1	7707116	7708285		chr1	21380418	21381967
chr21	8565902	8568564		Zv8_scaffold2979	80375	81078		chr1	7713163	7714365		chr1	21398420	21398950
chr21	9450540	9456381		Zv8_scaffold2979	165414	166162		chr1	7735594	7736297		chr1	22080645	22081465
chr21	11173640	11175238		Zv8_scaffold2981	89907	90270		chr1	7795088	7795691		chr1	22157193	22157918
chr21	11715760	11722283		Zv8_scaffold2982	36842	37256		chr1	7823332	7823937		chr1	22674472	22675276
chr21	11735957	11745896		Zv8_scaffold2982	72645	73195		chr1	7824087	7824928		chr1	22691729	22692441
chr21	11893165	11897123		Zv8_scaffold2985	31142	31491		chr1	7824930	7825463		chr1	22779736	22781010
chr21	14987118	14990141		Zv8_scaffold2985	50550	50942		chr1	7825914	7826493		chr1	22958801	22959376
chr21	15148291	15150550		Zv8_scaffold2985	170039	170623		chr1	7832709	7833247		chr1	23432192	23433165
chr21	15213789	15215911		Zv8_scaffold2985	173897	175047		chr1	7867988	7868466		chr1	23574767	23575422
chr21	15542091	15544108		Zv8_scaffold2989	32018	33461		chr1	7870615	7871498		chr1	23577168	23577693
chr21	16890662	16892393		Zv8_scaffold2989	34438	36394		chr1	9481525	9482098		chr1	23621079	23622095
chr21	17579017	17580838		Zv8_scaffold2989	42367	42730		chr1	9928844	9929381		chr1	23654053	23654640
chr21	17589204	17591601		Zv8_scaffold2992	24762	25665		chr1	10222958	10223860		chr1	23800781	23801242
chr21	17809634	17814026		Zv8_scaffold2992	129141	129941		chr1	10476762	10477314		chr1	23870417	23870943
chr21	19426884	19428291		Zv8_scaffold2992	160924	161518		chr1	10555003	10555521		chr1	24011206	24011722
chr21	19869975	19871902		Zv8_scaffold2994	59699	60170		chr1	10633810	10635208		chr1	24250146	24250583
chr21	20106015	20107690		Zv8_scaffold2996	51515	52239		chr1	10871040	10872155		chr1	24353109	24353683
chr21	20123997	20125699		Zv8_scaffold2998	13401	15879		chr1	10894970	10895722		chr1	24391943	24392969
chr21	20667861	20670312		Zv8_scaffold2998	19603	20141		chr1	10956756	10957284		chr1	24416175	24417047
chr21	20709790	20711923		Zv8_scaffold2998	109181	109538		chr1	11107403	11107950		chr1	24421940	24422658
chr21	20839282	20840528		Zv8_scaffold2998	109742	111830		chr1	11110996	11111699		chr1	24422725	24423332
chr21	21270083	21271765		Zv8_scaffold2998	113239	114093		chr1	11140352	11141146		chr1	24432450	24433005
chr21	21414304	21415661		Zv8_scaffold2998	117375	118382		chr1	11144208	11145129		chr1	24435107	24435568
chr21	23221665	23223046		Zv8_scaffold2998	122300	124184		chr1	11149763	11150398		chr1	24435778	24436335
chr21	23593658	23595815		Zv8_scaffold2998	126736	127110		chr1	11222772	11223305		chr1	24465634	24466954
chr21	23629284	23630693		Zv8_scaffold3002	41168	41672		chr1	11228124	11228671		chr1	24523278	24523971
chr21	25066332	25068091		Zv8_scaffold3011	24427	25060		chr1	11233105	11234073		chr1	24525831	24526402
chr21	26548503	26550549		Zv8_scaffold3011	31979	34366		chr1	11312221	11312976		chr1	24531746	24532282
chr21	26746292	26749388		Zv8_scaffold3012	125628	126017		chr1	11317911	11318457		chr1	24544691	24545527
chr21	26833512	26835517		Zv8_scaffold3013	13525	13806		chr1	12362255	12362968		chr1	24549202	24549775
chr21	27237978	27240733		Zv8_scaffold3013	104668	105060		chr1	12364839	12366579		chr1	24583808	24584635
chr21	27245881	27247710		Zv8_scaffold3015	239221	239692		chr1	12368237	12369878		chr1	24599163	24599709
chr21	28460024	28461653		Zv8_scaffold3016	460022	461068		chr1	12371949	12372760		chr1	24837440	24838014
chr21	28644567	28648287		Zv8_scaffold3017	78291	78944		chr1	12373726	12374306		chr1	24905753	24906091
chr21	29082162	29084284		Zv8_scaffold3020	81190	81848		chr1	12375970	12376914		chr1	25204636	25205026
chr21	29379085	29380807		Zv8_scaffold3020	110000	111175		chr1	12383740	12384806		chr1	25256452	25256931
chr21	30621398	30623442		Zv8_scaffold3020	153552	155911		chr1	12421919	12423562		chr1	25294735	25295547
chr21	31363398	31365005		Zv8_scaffold3020	156799	158425		chr1	12426098	12426956		chr1	25334432	25335782
chr21	32494709	32497068		Zv8_scaffold3020	159339	160370		chr1	12435342	12436096		chr1	25349865	25350660
chr21	32930783	32932654		Zv8_scaffold3020	160873	161296		chr1	12473376	12474662		chr1	25576421	25577001
chr21	32938692	32940371		Zv8_scaffold3020	176504	176881		chr1	12588781	12589282		chr1	25678820	25679860
chr21	34107384	34111471		Zv8_scaffold3020	265189	266861		chr1	13825123	13825622		chr1	25785599	25786087
chr21	34588203	34590646		Zv8_scaffold3020	273715	274301		chr1	13853280	13853815		chr1	25795784	25796369
chr21	34858911	34861087		Zv8_scaffold3020	276511	276856		chr1	14212104	14212717		chr1	26043355	26043956
chr21	35995739	35997439		Zv8_scaffold3021	188279	189034		chr1	14341472	14342078		chr1	26194161	26194589
chr21	38200542	38203171		Zv8_scaffold3021	233488	233885		chr1	14345477	14346013		chr1	26206493	26207151
chr21	38549749	38552172		Zv8_scaffold3021	240840	241209		chr1	14442778	14443515		chr1	26526330	26526831
chr21	38609701	38611345		Zv8_scaffold3021	247039	247881		chr1	14445771	14446299		chr1	26618058	26618679
chr21	39142654	39145126		Zv8_scaffold3021	257226	258062		chr1	14507778	14508821		chr1	26707689	26708191
chr21	39213365	39215850		Zv8_scaffold3021	261808	262630		chr1	14510536	14511373		chr1	26732562	26733461
chr21	39226948	39229103		Zv8_scaffold3022	210727	211443		chr1	14742910	14743576		chr1	26738396	26739140
chr21	39340969	39342413		Zv8_scaffold3022	217035	218642		chr1	15368127	15369491		chr1	26753879	26754546
chr21	39464632	39466864		Zv8_scaffold3023	72580	73070		chr1	15460387	15461058		chr1	26830541	26831700
chr21	39745705	39748181		Zv8_scaffold3023	74389	75034		chr1	15767911	15768464		chr1	26844035	26844602
chr21	40542697	40543862		Zv8_scaffold3023	181654	182931		chr1	15775692	15776716		chr1	26877138	26877749
chr21	43107907	43108989		Zv8_scaffold3025	42992	44178		chr1	15782618	15783231		chr1	26877762	26878592
chr21	43257560	43258898		Zv8_scaffold3025	44981	45933		chr1	15798518	15799426		chr1	26903198	26904326
chr21	44313905	44315593		Zv8_scaffold3025	55049	55910		chr1	15902410	15903427		chr1	26907651	26908664
chr22	202317	204455		Zv8_scaffold3025	59113	59704		chr1	15903440	15903964		chr1	26921449	26921793
chr22	1401287	1403433		Zv8_scaffold3025	136689	137805		chr1	15925056	15926672		chr1	26926509	26927072
chr22	1442418	1443751		Zv8_scaffold3025	177019	178702		chr1	15958551	15959330		chr1	26970803	26971173
chr22	4624987	4627194		Zv8_scaffold3025	179250	180492		chr1	16272229	16272733		chr1	26971328	26971956
chr22	5105755	5107967		Zv8_scaffold3025	183992	185324		chr1	16386817	16387450		chr1	26977674	26978165
chr22	7919002	7922933		Zv8_scaffold3025	194010	195283		chr1	16435070	16436368		chr1	27110220	27110871
chr22	8661733	8667144		Zv8_scaffold3025	203178	205797		chr1	16504773	16505357		chr1	27481590	27482171
chr22	12322624	12324234		Zv8_scaffold3025	222106	224141		chr1	16505525	16506058		chr1	27550114	27550589
chr22	13002946	13005222		Zv8_scaffold3025	226152	228897		chr1	16533408	16534766		chr1	27584264	27585640
chr22	14164259	14166334		Zv8_scaffold3025	230772	231286		chr1	16567164	16567785		chr1	27585901	27587048
chr22	14223071	14226269		Zv8_scaffold3025	233841	237189		chr1	16610553	16611317		chr1	27606005	27607020
chr22	16436923	16442233		Zv8_scaffold3025	242012	242500		chr1	16612756	16613168		chr1	27611639	27613167
chr22	16692860	16694534		Zv8_scaffold3025	245592	245958		chr1	16664338	16664834		chr1	27620545	27621290
chr22	17084289	17086391		Zv8_scaffold3025	247093	248407		chr1	16729410	16730058		chr1	27628458	27629261
chr22	17917230	17918980		Zv8_scaffold3025	249069	252273		chr1	16733135	16734024		chr1	27633960	27634973
chr22	18885344	18893773		Zv8_scaffold3025	257574	258149		chr1	16761210	16761743		chr1	27643581	27644113
chr22	18911461	18912972		Zv8_scaffold3025	262634	264110		chr1	16765826	16766641		chr1	27932162	27932711
chr22	19165109	19166269		Zv8_scaffold3025	288712	289465		chr1	16768443	16769064		chr1	28374566	28375049
chr22	20212654	20213805		Zv8_scaffold3025	319385	319905		chr1	16797057	16797683		chr1	28646917	28647467
chr22	20926315	20928530		Zv8_scaffold3025	333319	334005		chr1	16808944	16810227		chr1	28719589	28720373
chr22	22804141	22805837		Zv8_scaffold3025	459725	460108		chr1	16811129	16812304		chr1	28753352	28753945
chr22	23695509	23697353		Zv8_scaffold3025	549473	550496		chr1	16820363	16822159		chr1	28783684	28784326
chr22	26290982	26293105		Zv8_scaffold3025	551964	552382		chr1	16834926	16835456		chr1	28793143	28794175
chr22	26608925	26610306		Zv8_scaffold3025	569812	571129		chr1	16839191	16841339		chr1	28877547	28878026
chr22	27420181	27422501		Zv8_scaffold3025	574235	574760		chr1	16859192	16859772		chr1	29392412	29393016
chr22	32017382	32019265		Zv8_scaffold3025	578503	579235		chr1	16868513	16869020		chr1	29394782	29395373
chr22	32671661	32674397		Zv8_scaffold3025	580409	581223		chr1	16869040	16869827		chr1	29612710	29613767
chr22	32882654	32885225		Zv8_scaffold3025	582578	583729		chr1	16968838	16969582		chr1	29655880	29656887
chr22	33001560	33003477		Zv8_scaffold3025	585590	586665		chr1	16975959	16976465		chr1	29661259	29661788
chr22	33737895	33739695		Zv8_scaffold3025	587083	587947		chr1	16983768	16986366		chr1	29692549	29693167
chr22	34492532	34494230		Zv8_scaffold3025	593405	593780		chr1	17040244	17041511		chr1	29707401	29708043
chr22	34702138	34703241		Zv8_scaffold3025	594600	596576		chr1	17056144	17057424		chr1	29708297	29708951
chr22	35091411	35093593		Zv8_scaffold3025	597826	601341		chr1	17094915	17095584		chr1	29714096	29714686
chr22	36836946	36838370		Zv8_scaffold3025	604232	605507		chr1	17851572	17852070		chr1	29718412	29719208
chr22	36942484	36944003		Zv8_scaffold3025	605748	607035		chr1	18020470	18021465		chr1	29733668	29734458
chr22	36944165	36947865		Zv8_scaffold3025	611768	612794		chr1	18022040	18023397		chr1	29737180	29738403
chr22	39090188	39091937		Zv8_scaffold3025	617583	619762		chr1	18072105	18072756		chr1	29738434	29739213
chr22	39275461	39277597		Zv8_scaffold3025	621406	621861		chr1	18126331	18127107		chr1	29769747	29770514
chr23	550891	552584		Zv8_scaffold3025	624528	626125		chr1	18127375	18127829		chr1	30775250	30775793
chr23	2604640	2606670		Zv8_scaffold3025	628001	629020		chr1	18130671	18131151		chr1	30908083	30908643
chr23	3466752	3469382		Zv8_scaffold3025	636362	637956		chr1	18157935	18158551		chr1	30988823	30989686
chr23	3470676	3472776		Zv8_scaffold3025	646764	647447		chr1	18269016	18269934		chr1	31084490	31085056
chr23	3473306	3475837		Zv8_scaffold3025	653219	653995		chr1	18281502	18282286		chr1	31164822	31165909
chr23	4670728	4673070		Zv8_scaffold3025	686076	686706		chr1	18283678	18284450		chr1	31173903	31174684
chr23	5493031	5494440		Zv8_scaffold3026	8925	10087		chr1	18293967	18294807		chr1	31195246	31195927
chr23	6604961	6607196		Zv8_scaffold3026	15044	15935		chr1	18299263	18300239		chr1	31457816	31458359
chr23	7736610	7738847		Zv8_scaffold3026	21691	23075		chr1	18312111	18312638		chr1	32555211	32555770
chr23	8116934	8119975		Zv8_scaffold3026	24791	25246		chr1	18313589	18315816		chr1	32637295	32638475
chr23	8123683	8129307		Zv8_scaffold3026	45990	46463		chr1	18325600	18326640		chr1	33326734	33327277
chr23	8360921	8362770		Zv8_scaffold3026	47656	48720		chr1	18332048	18333100		chr1	33684634	33685300
chr23	8379947	8385174		Zv8_scaffold3026	72497	73892		chr1	18391392	18392152		chr1	33685830	33686376
chr23	8852192	8855172		Zv8_scaffold3026	81726	82365		chr1	18413141	18413671		chr1	33692938	33693558
chr23	8966370	8967806		Zv8_scaffold3026	84830	85390		chr1	18416291	18416872		chr1	34166392	34166763
chr23	10142813	10145598		Zv8_scaffold3026	89628	91696		chr1	18435013	18435562		chr1	34226332	34227104
chr23	10399548	10401328		Zv8_scaffold3026	93933	95241		chr1	18680266	18681058		chr1	34576582	34577010
chr23	11120948	11122974		Zv8_scaffold3026	102595	103652		chr1	18753033	18753794		chr1	34870476	34871746
chr23	11419491	11421621		Zv8_scaffold3026	107969	109075		chr1	18805662	18806162		chr1	34911137	34912177
chr23	12701477	12703560		Zv8_scaffold3026	132734	133270		chr1	18811965	18813004		chr1	34976203	34976590
chr23	13966435	13967922		Zv8_scaffold3026	141363	142104		chr1	18821845	18822358		chr1	35077184	35077764
chr23	16492964	16494621		Zv8_scaffold3026	158429	159131		chr1	19087713	19089141		chr1	35351621	35352161
chr23	16527280	16530014		Zv8_scaffold3026	172679	173583		chr1	19094963	19095610		chr1	35355922	35356452
chr23	16727994	16730240		Zv8_scaffold3026	196458	197625		chr1	19152107	19152701		chr1	35419616	35420085
chr23	17166002	17168095		Zv8_scaffold3026	200410	201063		chr1	19320678	19322664		chr1	35446230	35446867
chr23	17182409	17192326		Zv8_scaffold3026	208658	209807		chr1	19357850	19358985		chr1	35556624	35557468
chr23	17377308	17379571		Zv8_scaffold3027	220679	221247		chr1	19364760	19367558		chr1	35753055	35753725
chr23	17918370	17919756		Zv8_scaffold3028	17928	19271		chr1	19395179	19395924		chr1	35793182	35793923
chr23	18335910	18337356		Zv8_scaffold3028	19624	19950		chr1	19563677	19564125		chr1	35904501	35905090
chr23	18780087	18782865		Zv8_scaffold3028	52144	52596		chr1	19582298	19582979		chr1	35936922	35937592
chr23	19203313	19205894		Zv8_scaffold3028	75012	75968		chr1	19759389	19759956		chr1	36216982	36217575
chr23	19536415	19538045		Zv8_scaffold3028	86477	87119		chr1	19759972	19760743		chr1	36322233	36323369
chr23	21109822	21113063		Zv8_scaffold3028	91516	92785		chr1	19788751	19790048		chr1	36390026	36390685
chr23	21330029	21332292		Zv8_scaffold3028	94922	95320		chr1	19971905	19972427		chr1	36394020	36394583
chr23	21880092	21885333		Zv8_scaffold3028	106974	108177		chr1	20070059	20070406		chr1	36399313	36399970
chr23	21950847	21953128		Zv8_scaffold3028	109008	109878		chr1	20123828	20124627		chr1	36435424	36436000
chr23	22054630	22056266		Zv8_scaffold3028	111570	112094		chr1	20351090	20351646		chr1	36454911	36456032
chr23	22195794	22198360		Zv8_scaffold3028	120312	121323		chr1	20351788	20352350		chr1	36468127	36468767
chr23	22291615	22295049		Zv8_scaffold3028	137303	138184		chr1	20376088	20376588		chr1	36482230	36483048
chr23	22304998	22307147		Zv8_scaffold3028	146220	146609		chr1	20429043	20430325		chr1	36616259	36617150
chr23	22342517	22344206		Zv8_scaffold3028	152987	153790		chr1	20721018	20722181		chr1	36670331	36671068
chr23	22864063	22865268		Zv8_scaffold3028	394734	396186		chr1	20738784	20739358		chr1	36694517	36696158
chr23	22868740	22870552		Zv8_scaffold3028	408101	409026		chr1	20797071	20797541		chr1	36702803	36704350
chr23	22913741	22916427		Zv8_scaffold3028	413776	414667		chr1	21073164	21073899		chr1	36705162	36706124
chr23	22944840	22947311		Zv8_scaffold3028	418407	420277		chr1	21120281	21120899		chr1	36707909	36708829
chr23	23246709	23247897		Zv8_scaffold3028	428348	428732		chr1	21158884	21159294		chr1	36730272	36731618
chr23	23917480	23920181		Zv8_scaffold3028	432187	433061		chr1	21230841	21231202		chr1	36745722	36746239
chr23	24330258	24331880		Zv8_scaffold3028	438476	438743		chr1	21295725	21296991		chr1	36747511	36748820
chr23	24566085	24569294		Zv8_scaffold3028	444238	445130		chr1	21339658	21340743		chr1	36767494	36768364
chr23	24620038	24623024		Zv8_scaffold3028	447057	450611		chr1	21359790	21362401		chr1	36821695	36822193
chr23	24879257	24880739		Zv8_scaffold3028	459594	459879		chr1	21396925	21397422		chr1	36832470	36833169
chr23	25072161	25073949		Zv8_scaffold3028	491711	492250		chr1	21398245	21399028		chr1	37024539	37025436
chr23	25089416	25094604		Zv8_scaffold3029	55693	58530		chr1	21419798	21420427		chr1	37071621	37072548
chr23	25098477	25101434		Zv8_scaffold3029	62885	63505		chr1	22207837	22208578		chr1	37120930	37122021
chr23	25211273	25213801		Zv8_scaffold3029	198223	199491		chr1	22210870	22211578		chr1	37125099	37126992
chr23	25899206	25901886		Zv8_scaffold3029	208828	210479		chr1	22674506	22675225		chr1	37135947	37136447
chr23	26699496	26702051		Zv8_scaffold3029	251331	252037		chr1	22731695	22732727		chr1	37177975	37178528
chr23	26917777	26919440		Zv8_scaffold3029	254233	254731		chr1	22739530	22740055		chr1	37191550	37192126
chr23	27383513	27384995		Zv8_scaffold3029	272633	273409		chr1	22946638	22947252		chr1	37192156	37193763
chr23	28318678	28321064		Zv8_scaffold3029	278481	279632		chr1	23188968	23189482		chr1	37203203	37203974
chr23	28531910	28534768		Zv8_scaffold3029	282170	282799		chr1	23268293	23268979		chr1	37305315	37306629
chr23	28953268	28955831		Zv8_scaffold3029	283169	283464		chr1	23541570	23542687		chr1	37306659	37307244
chr23	29173599	29175790		Zv8_scaffold3029	285641	286725		chr1	23552501	23553227		chr1	37309613	37310486
chr23	29178497	29180230		Zv8_scaffold3029	299559	301276		chr1	23553297	23553871		chr1	37316270	37317001
chr23	29346533	29348415		Zv8_scaffold3029	302328	303468		chr1	23574385	23576038		chr1	37320902	37322204
chr23	29351854	29353567		Zv8_scaffold3029	309408	310439		chr1	23595792	23596254		chr1	37528428	37528977
chr23	30113561	30116289		Zv8_scaffold3029	313232	313663		chr1	23597341	23599123		chr1	37609324	37609982
chr23	30338872	30341703		Zv8_scaffold3029	326428	327276		chr1	23629677	23630543		chr1	37780239	37780835
chr23	31266475	31268311		Zv8_scaffold3032	25742	26952		chr1	23633460	23634723		chr1	38097201	38097805
chr23	32317931	32319852		Zv8_scaffold3032	89777	90190		chr1	23741734	23742036		chr1	38101214	38101703
chr23	34758419	34761737		Zv8_scaffold3032	131879	132132		chr1	23760067	23761053		chr1	38141437	38141959
chr23	34791642	34792877		Zv8_scaffold3032	144998	145652		chr1	23784487	23785100		chr1	38142012	38142465
chr23	35041070	35042420		Zv8_scaffold3032	150236	151896		chr1	23809646	23810156		chr1	38168680	38168993
chr23	35201235	35203033		Zv8_scaffold3032	153369	154495		chr1	23810227	23810983		chr1	38272149	38273025
chr23	35400376	35401992		Zv8_scaffold3033	164945	165340		chr1	23822286	23822772		chr1	38292169	38292910
chr23	35523598	35526298		Zv8_scaffold3033	169752	170646		chr1	24239081	24239505		chr1	38318341	38319280
chr23	35592264	35594764		Zv8_scaffold3034	166248	166682		chr1	24249972	24250789		chr1	38335990	38336609
chr23	35803666	35807474		Zv8_scaffold3035	264169	264522		chr1	24256749	24258407		chr1	38481850	38482584
chr23	35896415	35898678		Zv8_scaffold3035	329111	329930		chr1	24271179	24271688		chr1	39033460	39033995
chr23	35958466	35959866		Zv8_scaffold3038	33703	34102		chr1	24325367	24326110		chr1	39051727	39053614
chr23	37062380	37065692		Zv8_scaffold3038	156711	158042		chr1	24353971	24354406		chr1	39055969	39057746
chr23	37451406	37452797		Zv8_scaffold3038	174555	175949		chr1	24361858	24362389		chr1	39069343	39070306
chr23	37513002	37514694		Zv8_scaffold3041	28221	29205		chr1	24398179	24399454		chr1	39072409	39072899
chr23	40746262	40748416		Zv8_scaffold3041	89406	90373		chr1	24406848	24407782		chr1	39075286	39077146
chr23	41294074	41296132		Zv8_scaffold3041	126033	127310		chr1	24417524	24418093		chr1	39083134	39084696
chr23	41588173	41590115		Zv8_scaffold3041	134492	135154		chr1	24458549	24459138		chr1	39087020	39087632
chr24	361846	363180		Zv8_scaffold3041	150425	151483		chr1	24465582	24466941		chr1	39090479	39092126
chr24	1362966	1364234		Zv8_scaffold3041	165249	165480		chr1	24523303	24524123		chr1	39111269	39111906
chr24	1686563	1688359		Zv8_scaffold3041	166800	168498		chr1	24531559	24532227		chr1	39111977	39112812
chr24	2201997	2204540		Zv8_scaffold3041	212185	212538		chr1	24540448	24541080		chr1	39122334	39123243
chr24	3016506	3018404		Zv8_scaffold3041	227258	227893		chr1	24580913	24581590		chr1	39137027	39139518
chr24	3139116	3141438		Zv8_scaffold3041	291102	291577		chr1	24684867	24685312		chr1	39149673	39150303
chr24	3719257	3720918		Zv8_scaffold3041	295577	296822		chr1	24812376	24813040		chr1	39152520	39153254
chr24	5215068	5216918		Zv8_scaffold3041	308256	308795		chr1	24883840	24884326		chr1	39153645	39154377
chr24	5397881	5399728		Zv8_scaffold3041	311033	311476		chr1	24890754	24891263		chr1	39383532	39384125
chr24	5419914	5422319		Zv8_scaffold3041	321209	322097		chr1	25109565	25110012		chr1	39424973	39425840
chr24	5824576	5826366		Zv8_scaffold3041	330631	331655		chr1	25215707	25216412		chr1	39430676	39434218
chr24	5862959	5866258		Zv8_scaffold3041	349557	350755		chr1	25222549	25224392		chr1	39444023	39444580
chr24	7266240	7268061		Zv8_scaffold3041	393260	393721		chr1	25226666	25227357		chr1	39621646	39622453
chr24	7735711	7737262		Zv8_scaffold3041	398406	400174		chr1	25236046	25237201		chr1	39630725	39631151
chr24	8343851	8345962		Zv8_scaffold3041	404728	406034		chr1	25265796	25266455		chr1	39783865	39784582
chr24	8456334	8458307		Zv8_scaffold3041	422661	423058		chr1	25286397	25288079		chr1	39810043	39810691
chr24	8469981	8471976		Zv8_scaffold3045	30899	31262		chr1	25294260	25295882		chr1	39810804	39811352
chr24	8565121	8567128		Zv8_scaffold3045	73407	74254		chr1	25297668	25298203		chr1	39828183	39828990
chr24	8974878	8977580		Zv8_scaffold3045	96705	97071		chr1	25305230	25306257		chr1	40055008	40055679
chr24	10455774	10457854		Zv8_scaffold3045	106356	107536		chr1	25325083	25325797		chr1	40059217	40059995
chr24	10623675	10626087		Zv8_scaffold3045	226155	226647		chr1	25329402	25333206		chr1	40089969	40090482
chr24	11982900	11987059		Zv8_scaffold3045	247807	248167		chr1	25335834	25336632		chr1	40132459	40133029
chr24	12190743	12194233		Zv8_scaffold3048	69762	70109		chr1	25338545	25340046		chr1	40201085	40201544
chr24	12461117	12463709		Zv8_scaffold3049	304316	308208		chr1	25341510	25342289		chr1	40204642	40206466
chr24	12833729	12836462		Zv8_scaffold3049	372398	373696		chr1	25349624	25351036		chr1	40216864	40217772
chr24	12852890	12854670		Zv8_scaffold3049	375109	376002		chr1	25566248	25566775		chr1	40241947	40242427
chr24	12954138	12955554		Zv8_scaffold3049	385528	386074		chr1	25582439	25583128		chr1	40254488	40255179
chr24	13292774	13294310		Zv8_scaffold3050	260112	260563		chr1	25583264	25583889		chr1	40290167	40290824
chr24	13308680	13310561		Zv8_scaffold3054	37571	38070		chr1	25584025	25585520		chr1	40314947	40315545
chr24	14796425	14798528		Zv8_scaffold3057	14522	14874		chr1	25748725	25749398		chr1	40321103	40321654
chr24	15766957	15768307		Zv8_scaffold3057	18603	20145		chr1	25766673	25767640		chr1	40322662	40323855
chr24	15903372	15907506		Zv8_scaffold3057	106343	107115		chr1	25857253	25857803		chr1	40323862	40324333
chr24	16349174	16352190		Zv8_scaffold3059	269258	269516		chr1	25885944	25886443		chr1	40340953	40341778
chr24	18496123	18497793		Zv8_scaffold3060	129947	130342		chr1	26020823	26021343		chr1	40356622	40357573
chr24	19054913	19058409		Zv8_scaffold3060	133256	133481		chr1	26033458	26033887		chr1	40362154	40362704
chr24	19339215	19341451		Zv8_scaffold3060	196539	197053		chr1	26042239	26042826		chr1	40376947	40377945
chr24	20468800	20470350		Zv8_scaffold3061	195539	196585		chr1	26042964	26044281		chr1	40384964	40385782
chr24	20608615	20611288		Zv8_scaffold3062	49767	50137		chr1	26422978	26423575		chr1	40393198	40393769
chr24	20953703	20956025		Zv8_scaffold3062	67926	68463		chr1	26429104	26429902		chr1	40724039	40724612
chr24	22656270	22658848		Zv8_scaffold3062	68747	69571		chr1	26539622	26540235		chr1	40835169	40835705
chr24	22660348	22662022		Zv8_scaffold3066	53967	54341		chr1	26716329	26716807		chr1	40924111	40924951
chr24	22663739	22665878		Zv8_scaffold3066	243187	245023		chr1	26877202	26877704		chr1	40932827	40933336
chr24	22956680	22958456		Zv8_scaffold3071	169977	170406		chr1	26884749	26885223		chr1	40944716	40945285
chr24	23055888	23057735		Zv8_scaffold3071	187798	188924		chr1	26889415	26890190		chr1	40971226	40971798
chr24	23095486	23097642		Zv8_scaffold3082	68230	69431		chr1	26903174	26904385		chr1	41006400	41007055
chr24	23239804	23241792		Zv8_scaffold3086	19512	20656		chr1	27335819	27336929		chr1	41066586	41067059
chr24	23804187	23805434		Zv8_scaffold3086	60748	61663		chr1	27371066	27371981		chr1	41157547	41158522
chr24	24253389	24255302		Zv8_scaffold3086	65520	66109		chr1	27451001	27451604		chr1	41253672	41254522
chr24	26088598	26093350		Zv8_scaffold3086	78217	79128		chr1	27462784	27464351		chr1	41546572	41547117
chr24	27824202	27826440		Zv8_scaffold3086	83325	84527		chr1	27464424	27464926		chr1	41554040	41555812
chr24	28144449	28145751		Zv8_scaffold3086	91826	92363		chr1	27532427	27532928		chr1	41815837	41816682
chr24	28995364	28998021		Zv8_scaffold3086	100401	100665		chr1	27578251	27579000		chr1	42134324	42134820
chr24	29548415	29550856		Zv8_scaffold3086	137498	137941		chr1	27583125	27585640		chr1	42288662	42289356
chr24	30500893	30502052		Zv8_scaffold3086	186502	187526		chr1	27585719	27587217		chr1	42904390	42904966
chr24	33943641	33945794		Zv8_scaffold3086	230960	231305		chr1	27597952	27599561		chr1	43012332	43013171
chr24	33959287	33961283		Zv8_scaffold3086	271242	271456		chr1	27603130	27604657		chr1	43105275	43106467
chr24	34888921	34890640		Zv8_scaffold3088	17765	18858		chr1	27605943	27608113		chr1	43117926	43118481
chr24	36239176	36242718		Zv8_scaffold3088	85748	86482		chr1	27609291	27610294		chr1	43241391	43242841
chr24	36258796	36260654		Zv8_scaffold3088	104027	104747		chr1	27610844	27613248		chr1	43287323	43288893
chr24	36615627	36617699		Zv8_scaffold3088	134941	135331		chr1	27615728	27616652		chr1	43298142	43298885
chr24	36829925	36831239		Zv8_scaffold3088	146619	147276		chr1	27616800	27617387		chr1	43300622	43301684
chr24	39425807	39427499		Zv8_scaffold3091	29782	30828		chr1	27620655	27621300		chr1	43309541	43310499
chr25	210653	212966		Zv8_scaffold3091	43188	43692		chr1	27623758	27624793		chr1	43526878	43527367
chr25	224646	226221		Zv8_scaffold3091	89035	90139		chr1	27627076	27629524		chr1	43599269	43599757
chr25	233551	235826		Zv8_scaffold3091	142464	143190		chr1	27633013	27635017		chr1	43691758	43692197
chr25	255208	257473		Zv8_scaffold3091	174988	175321		chr1	27857474	27857956		chr1	43746515	43747069
chr25	703458	705196		Zv8_scaffold3091	198801	199254		chr1	28431049	28431610		chr1	43808339	43808976
chr25	811255	813035		Zv8_scaffold3091	249143	249558		chr1	28680005	28680971		chr1	43823798	43824395
chr25	1630647	1632021		Zv8_scaffold3091	253201	253638		chr1	28812135	28817348		chr1	43843439	43845075
chr25	4426758	4428460		Zv8_scaffold3094	19492	20328		chr1	29308771	29309278		chr1	43907461	43908036
chr25	4603016	4604122		Zv8_scaffold3099	65929	66308		chr1	29391413	29392217		chr1	43913229	43913864
chr25	6850928	6852876		Zv8_scaffold3099	67752	68733		chr1	29397539	29398383		chr1	43962220	43962736
chr25	7275885	7277890		Zv8_scaffold3099	76947	77848		chr1	29408236	29408979		chr1	44155533	44156077
chr25	9357865	9360098		Zv8_scaffold3103	206897	207916		chr1	29439297	29439893		chr1	44215701	44216215
chr25	9645348	9647301		Zv8_scaffold3104	94464	94820		chr1	29444074	29445714		chr1	44226627	44227199
chr25	9846215	9847282		Zv8_scaffold3105	98979	100433		chr1	29477851	29478739		chr1	44276413	44276972
chr25	9934174	9936107		Zv8_scaffold3105	101911	103774		chr1	29479153	29479667		chr1	44297203	44297813
chr25	10414579	10417414		Zv8_scaffold3105	117722	118388		chr1	29482934	29483800		chr1	44409978	44410533
chr25	13355491	13359064		Zv8_scaffold3105	134050	134809		chr1	29522482	29522974		chr1	44535591	44536436
chr25	14393527	14396946		Zv8_scaffold3106	51360	52093		chr1	29591336	29592597		chr1	44574539	44575276
chr25	14470599	14472308		Zv8_scaffold3106	301647	302274		chr1	29600813	29606503		chr1	44734294	44734974
chr25	16546364	16548213		Zv8_scaffold3107	144022	145747		chr1	29611999	29614012		chr1	44757183	44757802
chr25	16549455	16552306		Zv8_scaffold3108	253650	254669		chr1	29615446	29617066		chr1	44792564	44793146
chr25	17556626	17558556		Zv8_scaffold3110	20761	21159		chr1	29655787	29656897		chr1	44866223	44866777
chr25	18734564	18736591		Zv8_scaffold3112	17618	17989		chr1	29657096	29657748		chr1	44956030	44956550
chr25	18823518	18827985		Zv8_scaffold3112	67529	67961		chr1	29661139	29662222		chr1	45105960	45106378
chr25	20102811	20105388		Zv8_scaffold3112	107681	108916		chr1	29677355	29677822		chr1	45137019	45137548
chr25	21269840	21272017		Zv8_scaffold3112	140699	142240		chr1	29682750	29683292		chr1	45248016	45248472
chr25	21569505	21572208		Zv8_scaffold3112	144504	144913		chr1	29686424	29686929		chr1	45270647	45271193
chr25	22240796	22243349		Zv8_scaffold3114	212570	213169		chr1	29691011	29695175		chr1	45579257	45580036
chr25	22635298	22637235		Zv8_scaffold3115	68893	70590		chr1	29696389	29697581		chr1	46189889	46190918
chr25	23103598	23105713		Zv8_scaffold3115	76410	76836		chr1	29703631	29704930		chr1	46223156	46224004
chr25	23728642	23730214		Zv8_scaffold3115	101953	102541		chr1	29709987	29711215		chr1	46252153	46252941
chr25	25600504	25602064		Zv8_scaffold3115	112937	114112		chr1	29713895	29715181		chr1	46312227	46313099
chr25	27990043	27992280		Zv8_scaffold3117	6697	7453		chr1	29736303	29739031		chr1	46329763	46330263
chr25	28652612	28655481		Zv8_scaffold3117	97294	98286		chr1	29745104	29745800		chr1	46347756	46348441
chr25	29655810	29657348		Zv8_scaffold3117	123494	123862		chr1	29764510	29766222		chr1	46366046	46366756
chr25	30034879	30036343		Zv8_scaffold3117	171609	171951		chr1	30065472	30066471		chr1	46374352	46374934
chr25	30126451	30128553		Zv8_scaffold3117	439657	440098		chr1	30385984	30386510		chr1	46387760	46388663
chr25	30275088	30277855		Zv8_scaffold3119	59687	61153		chr1	30461498	30462027		chr1	46516137	46516995
chr25	30297154	30298550		Zv8_scaffold3119	62090	63268		chr1	30788283	30789460		chr1	46690471	46691784
chr25	30300322	30301709		Zv8_scaffold3121	72297	72800		chr1	30852622	30853258		chr1	46696273	46697554
chr25	30999922	31001643		Zv8_scaffold3121	245589	246567		chr1	30868967	30870590		chr1	46904610	46905413
chr25	32583553	32584890		Zv8_scaffold3123	118603	119277		chr1	30906298	30907027		chr1	47171194	47171699
chr25	33220748	33221775		Zv8_scaffold3123	301890	302835		chr1	30908478	30909408		chr1	47263275	47263968
chr25	33587175	33589007		Zv8_scaffold3123	334086	335024		chr1	30910063	30911449		chr1	47321464	47322233
chr25	34678764	34680290		Zv8_scaffold3123	372158	372544		chr1	30923548	30924210		chr1	47368579	47369181
chr25	35361249	35362704		Zv8_scaffold3125	35937	37647		chr1	30939813	30940314		chr1	47518655	47519871
chr25	35653394	35655202		Zv8_scaffold3127	43850	44256		chr1	30967833	30968537		chr1	47537296	47538058
chr25	35868955	35870510		Zv8_scaffold3127	128804	129536		chr1	30988676	30989329		chr1	47539232	47540938
chr25	38633286	38636387		Zv8_scaffold3127	130815	131906		chr1	31062656	31063142		chr1	47557127	47558243
chr3	439269	441294		Zv8_scaffold3127	137915	138686		chr1	31154679	31155465		chr1	47567468	47568387
chr3	817329	818702		Zv8_scaffold3127	139483	139918		chr1	31164789	31166475		chr1	47569566	47570000
chr3	3566165	3568502		Zv8_scaffold3127	143347	143967		chr1	31192068	31192908		chr1	47574617	47575527
chr3	3615039	3617054		Zv8_scaffold3127	173547	174195		chr1	31195106	31195926		chr1	47577339	47577865
chr3	5748409	5751073		Zv8_scaffold3127	176694	177214		chr1	31375932	31376701		chr1	47590258	47590739
chr3	7007124	7009435		Zv8_scaffold3127	185020	186262		chr1	31464307	31464911		chr1	47591531	47592201
chr3	7505135	7506493		Zv8_scaffold3127	187620	188447		chr1	31464920	31465552		chr1	47592843	47594339
chr3	8185012	8188199		Zv8_scaffold3127	188744	190842		chr1	31781324	31782404		chr1	47643270	47644332
chr3	10175747	10177913		chr1	25737	26474		chr1	31794008	31794615		chr1	47669301	47669901
chr3	12842929	12845371		chr1	94192	94991		chr1	31840640	31841061		chr1	47715712	47716501
chr3	14544420	14546347		chr1	267315	267870		chr1	32481491	32482013		chr1	47909669	47910297
chr3	14964491	14966224		chr1	577242	578010		chr1	32530225	32530665		chr1	47966136	47966697
chr3	16941557	16943216		chr1	578407	578832		chr1	32625705	32626300		chr1	48084281	48084778
chr3	17033501	17035240		chr1	699083	699835		chr1	33012829	33013214		chr1	48314045	48314894
chr3	17052273	17053896		chr1	743485	744743		chr1	33578765	33579303		chr1	48357296	48357901
chr3	18491818	18497171		chr1	833110	834389		chr1	33589903	33590621		chr1	48372100	48372843
chr3	18618691	18621419		chr1	1164720	1165588		chr1	33641957	33642480		chr1	48384682	48385267
chr3	18665309	18667236		chr1	1166380	1167110		chr1	33689226	33689740		chr1	48409378	48410066
chr3	18671757	18673692		chr1	1183499	1184284		chr1	34381739	34382367		chr1	48709742	48710317
chr3	18687621	18689669		chr1	1221793	1223048		chr1	34740025	34740657		chr1	48751145	48752027
chr3	18998646	19001061		chr1	1232921	1233764		chr1	34875753	34876679		chr1	48779191	48779917
chr3	19572844	19576550		chr1	1234157	1234907		chr1	34907961	34908379		chr1	49177663	49178374
chr3	20183131	20184350		chr1	1941048	1942263		chr1	34911449	34912578		chr1	49184690	49185318
chr3	20420304	20423229		chr1	2013843	2014644		chr1	35008315	35008723		chr1	49283685	49284340
chr3	20837471	20839049		chr1	2323928	2324820		chr1	35032367	35032817		chr1	49317196	49317777
chr3	21472689	21475959		chr1	2540301	2540921		chr1	35032818	35033486		chr1	49330568	49331177
chr3	22443910	22445627		chr1	2600519	2602718		chr1	35071901	35072804		chr1	49337200	49338299
chr3	23710902	23714089		chr1	2610272	2611490		chr1	35073506	35074206		chr1	49532061	49532673
chr3	23783531	23785848		chr1	2612838	2613349		chr1	35074393	35074896		chr1	49547175	49547686
chr3	23867939	23870260		chr1	2617419	2618277		chr1	35489012	35489594		chr1	49721311	49721863
chr3	23964522	23966476		chr1	2628238	2629653		chr1	35543934	35544556		chr1	49732541	49733083
chr3	24341996	24343633		chr1	2661502	2662963		chr1	35550611	35551308		chr1	49755575	49756127
chr3	25994108	25996979		chr1	2673571	2674766		chr1	35552844	35553458		chr1	49759133	49759966
chr3	26513664	26515661		chr1	2892008	2892796		chr1	35565156	35565828		chr1	49801970	49803068
chr3	27510086	27512146		chr1	3865649	3866404		chr1	35738195	35739161		chr1	49815037	49816288
chr3	28148748	28151030		chr1	3877139	3878375		chr1	35744040	35744700		chr1	49830216	49830802
chr3	28820046	28822241		chr1	3881979	3882512		chr1	35786424	35786849		chr1	49835502	49836179
chr3	29583293	29587411		chr1	3895292	3895934		chr1	35792584	35793403		chr1	49838428	49839969
chr3	30157440	30159032		chr1	3968902	3970123		chr1	35810635	35811191		chr1	49865144	49867072
chr3	30425838	30428625		chr1	3973406	3974991		chr1	36012893	36013829		chr1	49869018	49869945
chr3	30429394	30433946		chr1	3975509	3977355		chr1	36087838	36088668		chr1	49871846	49872558
chr3	30434256	30435761		chr1	3980219	3980899		chr1	36114522	36114970		chr1	49925828	49926319
chr3	30532208	30534394		chr1	3981675	3983159		chr1	36289879	36290350		chr1	49938331	49938897
chr3	30711865	30714083		chr1	3984070	3986864		chr1	36415663	36416552		chr1	49963744	49964466
chr3	31500086	31501877		chr1	3992527	3993659		chr1	36440900	36441672		chr1	49982328	49982976
chr3	31771330	31774080		chr1	4014435	4015242		chr1	36467345	36468201		chr1	50039343	50039893
chr3	31967747	31969395		chr1	4016826	4017520		chr1	36538094	36538660		chr1	50100214	50100738
chr3	32206518	32208319		chr1	4027310	4029435		chr1	36613422	36614524		chr1	50101205	50101813
chr3	32603362	32605226		chr1	4118507	4119277		chr1	36616372	36617397		chr1	50117651	50118163
chr3	33144783	33146747		chr1	4120876	4121521		chr1	36644427	36645360		chr1	50179964	50180517
chr3	33316692	33320245		chr1	4236335	4237283		chr1	36650792	36651509		chr1	50305681	50306239
chr3	35544116	35545429		chr1	4238845	4239577		chr1	36678966	36680086		chr1	50312596	50313352
chr3	36049160	36052831		chr1	4248837	4249588		chr1	36688507	36689735		chr1	50416760	50417348
chr3	37031828	37033986		chr1	4252033	4253417		chr1	36694807	36696333		chr1	50621562	50622040
chr3	37170428	37171699		chr1	4399623	4401230		chr1	36702520	36703746		chr1	50702871	50703427
chr3	37233409	37235571		chr1	4404405	4405476		chr1	36708181	36708706		chr1	50830566	50831227
chr3	37682159	37684108		chr1	4629788	4631119		chr1	36747369	36748342		chr1	51068527	51069208
chr3	37879766	37883328		chr1	4743506	4744056		chr1	36753511	36754657		chr1	51172499	51173285
chr3	38112916	38114530		chr1	4803911	4804670		chr1	36764175	36765127		chr1	51219020	51219626
chr3	38460750	38462419		chr1	4841508	4843623		chr1	36767115	36768437		chr1	51283939	51284538
chr3	38936994	38939196		chr1	4907069	4908233		chr1	36791243	36791798		chr1	51462632	51463163
chr3	38959797	38962525		chr1	4947415	4948874		chr1	36808904	36809844		chr1	51747793	51748275
chr3	39024914	39027733		chr1	5059762	5060251		chr1	36810459	36811522		chr1	51767256	51767695
chr3	39162262	39164574		chr1	5094916	5095581		chr1	36847978	36848406		chr1	51826571	51827071
chr3	39233362	39235031		chr1	5136943	5138256		chr1	36885983	36886584		chr1	52208267	52209011
chr3	39417969	39420390		chr1	5238506	5239547		chr1	36890381	36891072		chr1	52262125	52262717
chr3	39633560	39635657		chr1	5565250	5566302		chr1	36901887	36903059		chr1	52404890	52405337
chr3	39649853	39651758		chr1	5595183	5595694		chr1	36904660	36905837		chr1	52753898	52754454
chr3	40018554	40021151		chr1	5613157	5613760		chr1	36912983	36913529		chr1	52759375	52759857
chr3	40056033	40058968		chr1	5618593	5619413		chr1	36913935	36914895		chr1	53346145	53346649
chr3	40269214	40270588		chr1	5633911	5634965		chr1	36943653	36944238		chr1	53434036	53435000
chr3	40691051	40695187		chr1	5642850	5643459		chr1	36976637	36977156		chr1	53531904	53532461
chr3	40736633	40738091		chr1	5663901	5664629		chr1	37013669	37014161		chr1	53657599	53658169
chr3	41141851	41145342		chr1	5704770	5706152		chr1	37014851	37016519		chr1	53749071	53749646
chr3	42431721	42434990		chr1	5713622	5714401		chr1	37016520	37017872		chr1	53794305	53794868
chr3	43049658	43051344		chr1	5825926	5826402		chr1	37021476	37022503		chr1	53848312	53848819
chr3	43280964	43285274		chr1	5852740	5853355		chr1	37022841	37023797		chr1	53891205	53891848
chr3	43315519	43317557		chr1	5853476	5854380		chr1	37024632	37025599		chr1	53920560	53921538
chr3	43417598	43419045		chr1	5867970	5868600		chr1	37041161	37041679		chr1	54018041	54019272
chr3	43887763	43889041		chr1	5871693	5872338		chr1	37049320	37050147		chr1	54019349	54019999
chr3	46468399	46470859		chr1	5945816	5947518		chr1	37053319	37053893		chr1	54535855	54536255
chr3	46476359	46478204		chr1	6486736	6487630		chr1	37061410	37062387		chr1	55209222	55209837
chr3	49935625	49937423		chr1	7136019	7136522		chr1	37068478	37068978		chr1	55992391	55993084
chr3	50140566	50142591		chr1	7302081	7303339		chr1	37078405	37079062		chr1	56951754	56952619
chr3	50478791	50482211		chr1	7473083	7473661		chr1	37090985	37092354		chr1	57387907	57388408
chr3	51982296	51984225		chr1	7514588	7515937		chr1	37094313	37095077		chr1	57462132	57462763
chr3	53553156	53557238		chr1	7563030	7564165		chr1	37106947	37108137		chr1	57471112	57471638
chr3	53852391	53853827		chr1	7610113	7611034		chr1	37122682	37123243		chr1	58814038	58814844
chr3	53877811	53880396		chr1	7620994	7621755		chr1	37125489	37127108		chr1	58832877	58833424
chr3	55608781	55611125		chr1	7642150	7642752		chr1	37147039	37147612		chr1	58931798	58932277
chr3	59151355	59152771		chr1	7697095	7698130		chr1	37151392	37152030		chr1	59073132	59073745
chr3	60518210	60520380		chr1	7702946	7704022		chr1	37155609	37156122		chr1	59229216	59229891
chr3	60689900	60692432		chr1	7706670	7708435		chr1	37158192	37159342		chr1	59237273	59237896
chr4	2214354	2216820		chr1	7709478	7710504		chr1	37159667	37160726		chr1	59295933	59296425
chr4	2881417	2883017		chr1	7713276	7714366		chr1	37167294	37168396		chr1	59301679	59302232
chr4	3029979	3031893		chr1	7722769	7724382		chr1	37178720	37179413		chr10	16165	16981
chr4	4345320	4347349		chr1	7751488	7753156		chr1	37180419	37182502		chr10	31255	31885
chr4	4835032	4836597		chr1	7760767	7762101		chr1	37182587	37183643		chr10	50527	51426
chr4	7848270	7849814		chr1	7858075	7858877		chr1	37191451	37193927		chr10	76180	76799
chr4	8348370	8351107		chr1	7898365	7899416		chr1	37194082	37194592		chr10	89254	90162
chr4	8550337	8554009		chr1	7901470	7904912		chr1	37203862	37204846		chr10	186839	187509
chr4	8681875	8682994		chr1	7906981	7908311		chr1	37236271	37237066		chr10	236357	237247
chr4	10347084	10348930		chr1	9372291	9373193		chr1	37249498	37250281		chr10	274083	274781
chr4	11169054	11171526		chr1	9592189	9593186		chr1	37250882	37251840		chr10	289121	289999
chr4	11349791	11351978		chr1	9703943	9705800		chr1	37271831	37272404		chr10	381372	381939
chr4	11485179	11486799		chr1	9838165	9839258		chr1	37272866	37273774		chr10	385404	386095
chr4	11513473	11515705		chr1	9903440	9904458		chr1	37274211	37275325		chr10	424401	424915
chr4	12164982	12167205		chr1	9923725	9925929		chr1	37276978	37277530		chr10	490065	490625
chr4	12306728	12307963		chr1	10516583	10517806		chr1	37293928	37295412		chr10	564155	564640
chr4	12820678	12824843		chr1	10633591	10634613		chr1	37296284	37296788		chr10	596620	597232
chr4	13679200	13682245		chr1	10642055	10642898		chr1	37296805	37297926		chr10	606514	607086
chr4	13903450	13905163		chr1	10821114	10821730		chr1	37298006	37298564		chr10	619128	621086
chr4	13998728	14000135		chr1	10871129	10872123		chr1	37302512	37304154		chr10	647770	648372
chr4	14541954	14544224		chr1	10928633	10929433		chr1	37309635	37310572		chr10	670372	670941
chr4	16190328	16191335		chr1	11130049	11131570		chr1	37310858	37311125		chr10	751680	752147
chr4	16302542	16304353		chr1	12347303	12348280		chr1	37320563	37322419		chr10	758570	759221
chr4	16398546	16401090		chr1	12360864	12363068		chr1	37323936	37324589		chr10	775502	776125
chr4	16515185	16516824		chr1	12365122	12366397		chr1	37337679	37338190		chr10	786518	787373
chr4	16819315	16821640		chr1	12368041	12370116		chr1	37608884	37610324		chr10	806391	806983
chr4	16860896	16864390		chr1	12370200	12373009		chr1	37611371	37611999		chr10	1192749	1193448
chr4	17014128	17016306		chr1	12373668	12374591		chr1	37661954	37662540		chr10	1239380	1239864
chr4	18066747	18068491		chr1	12375917	12376914		chr1	37853318	37853800		chr10	1297641	1298342
chr4	18809650	18811049		chr1	12384388	12385005		chr1	37856578	37857231		chr10	1305550	1306063
chr4	19397438	19400692		chr1	12422124	12423886		chr1	37977599	37977976		chr10	1350339	1351167
chr4	19440952	19443779		chr1	12425951	12426848		chr1	37984947	37985593		chr10	1351248	1352078
chr4	19907351	19909668		chr1	12473398	12474493		chr1	38039992	38040407		chr10	1398230	1398875
chr4	20181720	20189636		chr1	12758910	12759485		chr1	38062450	38063327		chr10	1399483	1400225
chr4	20308811	20311469		chr1	13102773	13103404		chr1	38085812	38086663		chr10	1408119	1408680
chr4	20563286	20564849		chr1	13193307	13194738		chr1	38124589	38124959		chr10	1409022	1409548
chr4	20661417	20663094		chr1	13300337	13301011		chr1	38213234	38214293		chr10	1726482	1726969
chr4	21397338	21399212		chr1	13320743	13322541		chr1	38237858	38238299		chr10	2033277	2033938
chr4	22611659	22614162		chr1	14047142	14047820		chr1	38272160	38273193		chr10	2071399	2071925
chr4	22642858	22644493		chr1	14116529	14117074		chr1	38279370	38279823		chr10	2093922	2094379
chr4	22655938	22659870		chr1	14270814	14271654		chr1	38311162	38312439		chr10	2099558	2100028
chr4	22825648	22828521		chr1	14272631	14274000		chr1	38318385	38318975		chr10	2159909	2160433
chr4	23538440	23539403		chr1	14288973	14290180		chr1	38493800	38494640		chr10	2219445	2220191
chr4	24360047	24362425		chr1	14372069	14373591		chr1	38576262	38576765		chr10	2246596	2247147
chr4	26353780	26358028		chr1	14374231	14375175		chr1	38959231	38959888		chr10	2252507	2253151
chr4	32022963	32025894		chr1	14376000	14376870		chr1	39013433	39014325		chr10	2268173	2268678
chr4	32612238	32614414		chr1	14378671	14380691		chr1	39051770	39053610		chr10	2279229	2279771
chr4	32670917	32672332		chr1	14442637	14443674		chr1	39060173	39060928		chr10	2430219	2431159
chr4	32727610	32730743		chr1	14446364	14446847		chr1	39075124	39077175		chr10	2478186	2478721
chr4	37007132	37008909		chr1	14506651	14507472		chr1	39082869	39084695		chr10	2708973	2709584
chr4	61163154	61164387		chr1	15012180	15013107		chr1	39086765	39088300		chr10	2797759	2798401
chr4	68760220	68763121		chr1	15033829	15034325		chr1	39090334	39092080		chr10	2982859	2983298
chr5	1130310	1132780		chr1	15035654	15036172		chr1	39092922	39093682		chr10	3027368	3028136
chr5	3275146	3276600		chr1	15078297	15078822		chr1	39094099	39094933		chr10	4107060	4108257
chr5	3539499	3540780		chr1	15095338	15096313		chr1	39101699	39102223		chr10	4130753	4131523
chr5	4176732	4179288		chr1	15157573	15158528		chr1	39107765	39109769		chr10	4133464	4135063
chr5	4449211	4451251		chr1	15162073	15163090		chr1	39111213	39112632		chr10	4161623	4162674
chr5	7162912	7164790		chr1	15171302	15171976		chr1	39115205	39116486		chr10	4168062	4168769
chr5	10929350	10931556		chr1	15273812	15274822		chr1	39116544	39117637		chr10	4181988	4184604
chr5	12536772	12540657		chr1	15373263	15373900		chr1	39121791	39123681		chr10	4206963	4207742
chr5	13629108	13631284		chr1	15374323	15375092		chr1	39130080	39130560		chr10	4568322	4568970
chr5	14193519	14195896		chr1	15585923	15586468		chr1	39130679	39131280		chr10	5120008	5120609
chr5	15813372	15817592		chr1	15768021	15768615		chr1	39133781	39134967		chr10	5437025	5437539
chr5	16149449	16151498		chr1	15782554	15783395		chr1	39144606	39145909		chr10	5603479	5603954
chr5	16320578	16322129		chr1	15786627	15787374		chr1	39150869	39151397		chr10	5712446	5712993
chr5	17394836	17396403		chr1	15787400	15788474		chr1	39153625	39154968		chr10	5743128	5743951
chr5	17559528	17561180		chr1	15794165	15795720		chr1	39157484	39158320		chr10	6274995	6275556
chr5	17628558	17631269		chr1	15830538	15831717		chr1	39160451	39163052		chr10	6662179	6663618
chr5	17632590	17636193		chr1	15902295	15903832		chr1	39164321	39165645		chr10	6716457	6716974
chr5	17644120	17645947		chr1	15925024	15926601		chr1	39206449	39207654		chr10	6737620	6738006
chr5	17849848	17851405		chr1	15930428	15930988		chr1	39297723	39298314		chr10	6747586	6748065
chr5	18033996	18039685		chr1	15932013	15932815		chr1	39350982	39351500		chr10	7527019	7528292
chr5	18316122	18318452		chr1	15932993	15934674		chr1	39424704	39425983		chr10	8098998	8099707
chr5	20066015	20067522		chr1	15937360	15938043		chr1	39430694	39431545		chr10	8107718	8108290
chr5	20298693	20300239		chr1	16169706	16170602		chr1	39431579	39434039		chr10	8236385	8236938
chr5	20344810	20348112		chr1	16171406	16172879		chr1	39569200	39570019		chr10	8279279	8280065
chr5	21411426	21413748		chr1	16188390	16190063		chr1	39575380	39576067		chr10	8390882	8391437
chr5	21483520	21485667		chr1	16255874	16256932		chr1	39577058	39578566		chr10	8473913	8474450
chr5	22379114	22380509		chr1	16272289	16273565		chr1	39580728	39581826		chr10	8744561	8745107
chr5	22748376	22749923		chr1	16593107	16594212		chr1	39587884	39588654		chr10	8755977	8756640
chr5	23127517	23131138		chr1	16666440	16667370		chr1	39612495	39613306		chr10	8769460	8770083
chr5	23539508	23541870		chr1	16675831	16676349		chr1	39621090	39621821		chr10	8774027	8774580
chr5	24073836	24075833		chr1	16709493	16711106		chr1	39621826	39622359		chr10	8793779	8794415
chr5	25354041	25356400		chr1	16711875	16712402		chr1	39663117	39664550		chr10	8817896	8818442
chr5	25641239	25643955		chr1	16712988	16713559		chr1	39786043	39786603		chr10	8835760	8836632
chr5	25865937	25867864		chr1	16719698	16720188		chr1	39802498	39803312		chr10	8951203	8951655
chr5	26216786	26219312		chr1	16721797	16722639		chr1	40046363	40047236		chr10	9000068	9000667
chr5	27131055	27132866		chr1	16726859	16728884		chr1	40054718	40055561		chr10	9142700	9143149
chr5	27479542	27481357		chr1	16732920	16734715		chr1	40056544	40057097		chr10	9152199	9152660
chr5	27804311	27806954		chr1	16765741	16766635		chr1	40064081	40065573		chr10	9402701	9403314
chr5	27851190	27855711		chr1	16811124	16812847		chr1	40108861	40109589		chr10	9620610	9621122
chr5	28041967	28044625		chr1	16820545	16822118		chr1	40155973	40156436		chr10	9668614	9669308
chr5	29546499	29548038		chr1	16840187	16841066		chr1	40201206	40201950		chr10	9673255	9674018
chr5	29568582	29570573		chr1	16849886	16852411		chr1	40216265	40216787		chr10	10079483	10080044
chr5	30473649	30476419		chr1	16868982	16870085		chr1	40233228	40233833		chr10	10770618	10771174
chr5	30976932	30979243		chr1	16874403	16875313		chr1	40242959	40243546		chr10	10927417	10928035
chr5	31744170	31746877		chr1	16894697	16895471		chr1	40249404	40250203		chr10	11107289	11107844
chr5	31874636	31876635		chr1	16896142	16897880		chr1	40322847	40323441		chr10	11243982	11244542
chr5	32137461	32139674		chr1	16900227	16900784		chr1	40345919	40346407		chr10	11251187	11251814
chr5	32156845	32158930		chr1	16956864	16957419		chr1	40352987	40353622		chr10	11328724	11329273
chr5	32367810	32368895		chr1	16968572	16969654		chr1	40355964	40356491		chr10	11356954	11357448
chr5	32399913	32403959		chr1	16975705	16976314		chr1	40388985	40390010		chr10	11381229	11381819
chr5	32863085	32868570		chr1	17084653	17085793		chr1	40404998	40405617		chr10	11387453	11388261
chr5	33024535	33026933		chr1	17162733	17163967		chr1	40425744	40426380		chr10	11403278	11403783
chr5	33854577	33856219		chr1	17165636	17166610		chr1	40467201	40467687		chr10	11427875	11428458
chr5	34195224	34198371		chr1	17358588	17359758		chr1	40527146	40527749		chr10	11428525	11429478
chr5	35613620	35616430		chr1	17793687	17794323		chr1	40548812	40549382		chr10	11431199	11434062
chr5	35646743	35649206		chr1	17850672	17851411		chr1	40586694	40587193		chr10	11434184	11434741
chr5	35670090	35674089		chr1	18020657	18021380		chr1	40593475	40594155		chr10	11468859	11469408
chr5	37483016	37485011		chr1	18022312	18023613		chr1	40743298	40744806		chr10	11477373	11477907
chr5	38026628	38029128		chr1	18031516	18032211		chr1	40815969	40816524		chr10	11508370	11509005
chr5	38498854	38501035		chr1	18049537	18050756		chr1	40860476	40861507		chr10	11571512	11571933
chr5	38813377	38815933		chr1	18052335	18053183		chr1	40923908	40925438		chr10	11607461	11608017
chr5	38917843	38920411		chr1	18066669	18067532		chr1	40932789	40933257		chr10	11609591	11610260
chr5	39137788	39139546		chr1	18242337	18242810		chr1	40938782	40939763		chr10	11643710	11645197
chr5	39598451	39599645		chr1	18249532	18250863		chr1	41157743	41158360		chr10	11855361	11855851
chr5	39606091	39609127		chr1	18258308	18259008		chr1	41159025	41159465		chr10	11877217	11877775
chr5	39618158	39620950		chr1	18283746	18284278		chr1	41216683	41217810		chr10	12126577	12127109
chr5	39628670	39631013		chr1	18299120	18300437		chr1	41302780	41303615		chr10	12340535	12341015
chr5	39633350	39635982		chr1	18313181	18315588		chr1	41546727	41547849		chr10	12792362	12793699
chr5	40379356	40382602		chr1	18325647	18326853		chr1	41554071	41555756		chr10	12929931	12930564
chr5	40391485	40392950		chr1	18329762	18330531		chr1	41818224	41819147		chr10	12996215	12996782
chr5	40558690	40560575		chr1	18335620	18336561		chr1	42130802	42131642		chr10	13305762	13306421
chr5	41554962	41556982		chr1	18488858	18489435		chr1	42219511	42220026		chr10	13360768	13361203
chr5	42670501	42673837		chr1	18583287	18584789		chr1	42268809	42269358		chr10	13590542	13591220
chr5	42676557	42679491		chr1	18680233	18680988		chr1	42475259	42475773		chr10	13599119	13599969
chr5	43190012	43192214		chr1	18785509	18786471		chr1	42905343	42905899		chr10	13603601	13605665
chr5	44535291	44538420		chr1	18794486	18795027		chr1	42978793	42979255		chr10	13615854	13617180
chr5	45976344	45978094		chr1	18804352	18806251		chr1	43012196	43012781		chr10	13618353	13618956
chr5	46879548	46882826		chr1	18811916	18813234		chr1	43028684	43030036		chr10	13627135	13628001
chr5	48674614	48677137		chr1	18818876	18819525		chr1	43123152	43123695		chr10	13680585	13681149
chr5	48685464	48687464		chr1	18821506	18823068		chr1	43127369	43127821		chr10	13690366	13691029
chr5	48976014	48980047		chr1	18823808	18825243		chr1	43129150	43131491		chr10	13870974	13872364
chr5	49126836	49128787		chr1	18829299	18831067		chr1	43246024	43247456		chr10	14194029	14194671
chr5	49238743	49240920		chr1	18856840	18857462		chr1	43251553	43254306		chr10	14248364	14248924
chr5	51186624	51188384		chr1	18930982	18931907		chr1	43256103	43257541		chr10	14273382	14275364
chr5	52733909	52735412		chr1	19033107	19034169		chr1	43286087	43288864		chr10	14294862	14295377
chr5	52844003	52845972		chr1	19051815	19052604		chr1	43292658	43293866		chr10	14569451	14569855
chr5	52948330	52951215		chr1	19087215	19089700		chr1	43304889	43306356		chr10	14571613	14572095
chr5	53064712	53070783		chr1	19089705	19092022		chr1	43306828	43307410		chr10	14606477	14607349
chr5	54890779	54892436		chr1	19093534	19095930		chr1	43313118	43313992		chr10	14764426	14765431
chr5	55092193	55093932		chr1	19109810	19110354		chr1	43349070	43349574		chr10	15218036	15218784
chr5	55364913	55366589		chr1	19111528	19113695		chr1	43524357	43524976		chr10	15634837	15635261
chr5	58982997	58985725		chr1	19116734	19118538		chr1	43700676	43701668		chr10	15644810	15645366
chr5	59586250	59588494		chr1	19118885	19120344		chr1	43706573	43707087		chr10	15660763	15661439
chr5	60185635	60188658		chr1	19120942	19122958		chr1	43707102	43707519		chr10	15730618	15731449
chr5	60433083	60435347		chr1	19138846	19140594		chr1	43812797	43813468		chr10	15845471	15846144
chr5	60953380	60955412		chr1	19149784	19150349		chr1	43823699	43824668		chr10	16266996	16268138
chr5	61275196	61280088		chr1	19215146	19216736		chr1	43825730	43826709		chr10	16861032	16861566
chr5	61614857	61619066		chr1	19319256	19320117		chr1	43827497	43828023		chr10	16924814	16925461
chr5	61633882	61639580		chr1	19320532	19322621		chr1	43842584	43847578		chr10	16987646	16988191
chr5	63814554	63817504		chr1	19357981	19359028		chr1	43855280	43856347		chr10	17065461	17066352
chr5	64082440	64084804		chr1	19582258	19583104		chr1	43876212	43876752		chr10	17150871	17151634
chr5	66316091	66317439		chr1	19759153	19761335		chr1	43990950	43991403		chr10	17286564	17287118
chr5	70165104	70167595		chr1	19788881	19789677		chr1	44406813	44407490		chr10	17303022	17303667
chr5	70172035	70174106		chr1	20024323	20025157		chr1	44442374	44443178		chr10	17319598	17320295
chr5	73281005	73283090		chr1	20094901	20095475		chr1	44465468	44466133		chr10	17620899	17621516
chr5	74353752	74355530		chr1	20355537	20357449		chr1	44503122	44503894		chr10	17954142	17954846
chr6	822882	824864		chr1	20366292	20366839		chr1	44505974	44506631		chr10	18093572	18094207
chr6	1115554	1119265		chr1	20370136	20371166		chr1	44514350	44514767		chr10	18098104	18098611
chr6	1318216	1320302		chr1	20372118	20373292		chr1	44550219	44550745		chr10	18124738	18125449
chr6	1322407	1327865		chr1	20374699	20376897		chr1	44562075	44562921		chr10	18211156	18211506
chr6	1679350	1680996		chr1	20404490	20405723		chr1	44578943	44579533		chr10	18288067	18288616
chr6	4235740	4237261		chr1	20408979	20409446		chr1	44701439	44702702		chr10	18553660	18554202
chr6	5047939	5049165		chr1	20660332	20660802		chr1	44756936	44757447		chr10	18931100	18931722
chr6	5452305	5454148		chr1	20750092	20751265		chr1	44757613	44758470		chr10	18949485	18950268
chr6	7698035	7700956		chr1	20761336	20762229		chr1	44760367	44761796		chr10	19016834	19017419
chr6	7822031	7824413		chr1	20762639	20763564		chr1	44788474	44789145		chr10	19030391	19031075
chr6	8628810	8630279		chr1	20832430	20834142		chr1	44797341	44797864		chr10	19040122	19040682
chr6	9837294	9838958		chr1	21119834	21120985		chr1	44800345	44800942		chr10	19043529	19044061
chr6	10702871	10704982		chr1	21168271	21169107		chr1	44820676	44821296		chr10	19057430	19058073
chr6	10714609	10718711		chr1	21224801	21226087		chr1	44837809	44838369		chr10	19112456	19113124
chr6	10983605	10984899		chr1	21295578	21297108		chr1	44857532	44858339		chr10	19181181	19182023
chr6	11304697	11305929		chr1	21316574	21317395		chr1	44862842	44863666		chr10	19198422	19199117
chr6	11751040	11753254		chr1	21331536	21332453		chr1	45013786	45014267		chr10	19211545	19212096
chr6	12212949	12215570		chr1	21332588	21333199		chr1	45070225	45070851		chr10	19229875	19230839
chr6	12779937	12782961		chr1	21333224	21334824		chr1	45113162	45113780		chr10	19245147	19245641
chr6	13196011	13201581		chr1	21339086	21341023		chr1	45620866	45622637		chr10	19272939	19273551
chr6	13264471	13267065		chr1	21380067	21380841		chr1	45702781	45703621		chr10	19300156	19301360
chr6	13434466	13436531		chr1	21419731	21420748		chr1	45778683	45779254		chr10	19301362	19301911
chr6	13529703	13531551		chr1	21568286	21569073		chr1	45794997	45795650		chr10	19475917	19476479
chr6	14892642	14895357		chr1	21901841	21902617		chr1	46082514	46083227		chr10	19481274	19481898
chr6	15395523	15398167		chr1	22207192	22209487		chr1	46187878	46188376		chr10	19783717	19784362
chr6	16377522	16379298		chr1	22211051	22211782		chr1	46190256	46190900		chr10	19831027	19831563
chr6	17615658	17618159		chr1	22294615	22296464		chr1	46192563	46193203		chr10	19850926	19851459
chr6	17624942	17629836		chr1	22402329	22403409		chr1	46193493	46194149		chr10	19861148	19861684
chr6	18771482	18773571		chr1	22408203	22409247		chr1	46198829	46199391		chr10	19924746	19925307
chr6	19036756	19039288		chr1	22490313	22491525		chr1	46205825	46206512		chr10	20050218	20050869
chr6	20389630	20394337		chr1	22506759	22507536		chr1	46223019	46223541		chr10	20059050	20059550
chr6	20427922	20430364		chr1	22507916	22509052		chr1	46223615	46224014		chr10	20080720	20081688
chr6	20442502	20446119		chr1	22511268	22512166		chr1	46248422	46249137		chr10	20086700	20089635
chr6	20574589	20576063		chr1	22559904	22560418		chr1	46252570	46253048		chr10	20093994	20094999
chr6	24174612	24177413		chr1	22671746	22672354		chr1	46257253	46258066		chr10	20262000	20262653
chr6	26971163	26973112		chr1	22674465	22675342		chr1	46265576	46266091		chr10	20350149	20350662
chr6	27631066	27633161		chr1	22691168	22692746		chr1	46282378	46283166		chr10	20610725	20611402
chr6	28283612	28285069		chr1	22696326	22697922		chr1	46302499	46303447		chr10	20615508	20616765
chr6	28332529	28335811		chr1	22737555	22738655		chr1	46312010	46313466		chr10	20997825	20998387
chr6	28723417	28724961		chr1	22780170	22780713		chr1	46415097	46416554		chr10	21004021	21004781
chr6	28750128	28752301		chr1	22926835	22928316		chr1	46487894	46488547		chr10	21042305	21042895
chr6	29602452	29604444		chr1	22946527	22947220		chr1	46491956	46492928		chr10	21059564	21060123
chr6	30184069	30186052		chr1	23007341	23008085		chr1	46496895	46497392		chr10	21063039	21064401
chr6	30431365	30432523		chr1	23253463	23255017		chr1	46507642	46508097		chr10	21093389	21094019
chr6	31141262	31143762		chr1	23533409	23533874		chr1	46508147	46509129		chr10	21096577	21097912
chr6	31161734	31167132		chr1	23541579	23542618		chr1	46592037	46592865		chr10	21102057	21102599
chr6	31185307	31187686		chr1	23552116	23554120		chr1	46599150	46599687		chr10	21288817	21289255
chr6	31637675	31639354		chr1	23554931	23557036		chr1	46601031	46601991		chr10	21616628	21617133
chr6	31647030	31649379		chr1	23559046	23559622		chr1	46615667	46616188		chr10	21681692	21682250
chr6	31662309	31663899		chr1	23569283	23570631		chr1	46631916	46632327		chr10	21698150	21698830
chr6	32262248	32264065		chr1	23573141	23578212		chr1	46670262	46670833		chr10	21710274	21710775
chr6	32696473	32698564		chr1	23582286	23583823		chr1	46683795	46685513		chr10	21820247	21820746
chr6	32747960	32750413		chr1	23586756	23589807		chr1	46690386	46691430		chr10	21832751	21834048
chr6	33034568	33037227		chr1	23590359	23593446		chr1	46696562	46697542		chr10	21970654	21971166
chr6	33070472	33073344		chr1	23594225	23599441		chr1	46782449	46783150		chr10	22086115	22086626
chr6	33339999	33342702		chr1	23599727	23601349		chr1	46830392	46831510		chr10	22518531	22518953
chr6	33379812	33382175		chr1	23601662	23603585		chr1	46835237	46836285		chr10	22535672	22536447
chr6	33550390	33551471		chr1	23618576	23619819		chr1	46840052	46840581		chr10	22549951	22550811
chr6	33713893	33716263		chr1	23620650	23622120		chr1	46893443	46894529		chr10	22553460	22553959
chr6	33812376	33814375		chr1	23629311	23630482		chr1	46912176	46912749		chr10	22556023	22556592
chr6	33942268	33949777		chr1	23630945	23631558		chr1	47207891	47208469		chr10	22577558	22578555
chr6	34077000	34078577		chr1	23633353	23634748		chr1	47225064	47225673		chr10	22581085	22581538
chr6	34580117	34585410		chr1	23637118	23637945		chr1	47232054	47232721		chr10	22593520	22594367
chr6	34970808	34974187		chr1	23726658	23728472		chr1	47265707	47266309		chr10	22601456	22603576
chr6	35350617	35352251		chr1	23773781	23774296		chr1	47368046	47369562		chr10	22625250	22625761
chr6	35463367	35465696		chr1	23786170	23787294		chr1	47370022	47372795		chr10	22640141	22640760
chr6	35555360	35558125		chr1	23794740	23795980		chr1	47394058	47394537		chr10	22646291	22646885
chr6	36525615	36528108		chr1	23796854	23797902		chr1	47431001	47431523		chr10	22659043	22659646
chr6	36530193	36532311		chr1	23809946	23810781		chr1	47510995	47511562		chr10	22665835	22666524
chr6	36826925	36828633		chr1	23828325	23829312		chr1	47514157	47515760		chr10	22668893	22669433
chr6	37416542	37418201		chr1	23853784	23855060		chr1	47517835	47518340		chr10	22684562	22686703
chr6	37896770	37898037		chr1	23882618	23883423		chr1	47518714	47519825		chr10	22686847	22688084
chr6	42045217	42048428		chr1	23896103	23896808		chr1	47533079	47534470		chr10	22689549	22691225
chr6	42823202	42824746		chr1	24134312	24135180		chr1	47543079	47543651		chr10	22701555	22702607
chr6	45334753	45336332		chr1	24256610	24259034		chr1	47572196	47572722		chr10	22711715	22712375
chr6	46006801	46008335		chr1	24276125	24277172		chr1	47574314	47575301		chr10	22732363	22733165
chr6	46696030	46699379		chr1	24285360	24286557		chr1	47591500	47592418		chr10	22735531	22736345
chr6	46812780	46815114		chr1	24406691	24407579		chr1	47592843	47594548		chr10	22749528	22750778
chr6	47020857	47023089		chr1	24425019	24427521		chr1	47609402	47610051		chr10	22764895	22766153
chr6	48193660	48195823		chr1	24432284	24433347		chr1	47630528	47631148		chr10	22767569	22769353
chr6	48242515	48244791		chr1	24458536	24459031		chr1	47672299	47674023		chr10	22771186	22772411
chr6	48395212	48397481		chr1	24506505	24507214		chr1	47782721	47783779		chr10	22777603	22778258
chr6	48452914	48454708		chr1	24523003	24524412		chr1	47786910	47787914		chr10	22790920	22791359
chr6	48468350	48470866		chr1	24525346	24526957		chr1	47813173	47813677		chr10	22814298	22814865
chr6	48978777	48980564		chr1	24595978	24599008		chr1	47873550	47874711		chr10	22826044	22826670
chr6	49438868	49444224		chr1	24602013	24602942		chr1	47875880	47876513		chr10	22838024	22839709
chr6	50909434	50913383		chr1	24695997	24696551		chr1	47878834	47879735		chr10	22843403	22844493
chr6	53464882	53466436		chr1	24883618	24884128		chr1	47888502	47889007		chr10	22886930	22887854
chr6	54571691	54573004		chr1	24965314	24966317		chr1	47889266	47889789		chr10	22889329	22891004
chr6	54858605	54860764		chr1	25069886	25071066		chr1	47901875	47902349		chr10	22900170	22901183
chr6	54936124	54938651		chr1	25168771	25169401		chr1	47945991	47946600		chr10	22910790	22911977
chr6	56509739	56512281		chr1	25222706	25224384		chr1	47947775	47948265		chr10	22927771	22928329
chr6	56548685	56550096		chr1	25250695	25251712		chr1	47972472	47973475		chr10	22957007	22957651
chr6	56722081	56724004		chr1	25255915	25257302		chr1	47989863	47990382		chr10	22989328	22990595
chr6	57179397	57181187		chr1	25260587	25261285		chr1	47991967	47992528		chr10	22994473	22995908
chr6	59961447	59963384		chr1	25262825	25264025		chr1	48061127	48061913		chr10	22997199	22998004
chr6	60524939	60527603		chr1	25275478	25278313		chr1	48073152	48073711		chr10	23008119	23009767
chr7	5026284	5028810		chr1	25286471	25288129		chr1	48078403	48078900		chr10	23080477	23081485
chr7	7455846	7457773		chr1	25289225	25290629		chr1	48103815	48104250		chr10	23121239	23121846
chr7	9341111	9343270		chr1	25292136	25293072		chr1	48694098	48694649		chr10	23150898	23151503
chr7	10323408	10324644		chr1	25294798	25295772		chr1	48697294	48698253		chr10	23166217	23166760
chr7	12264848	12266869		chr1	25302470	25304916		chr1	48745048	48745645		chr10	23181910	23182579
chr7	12878545	12880553		chr1	25310928	25311921		chr1	48754589	48755475		chr10	23216373	23217104
chr7	13989700	13995045		chr1	25324921	25326899		chr1	48757253	48757713		chr10	23395136	23396031
chr7	13995169	13998210		chr1	25331400	25333089		chr1	48761934	48763110		chr10	23406129	23406698
chr7	15965098	15966458		chr1	25334250	25335671		chr1	48765460	48766654		chr10	23407354	23407995
chr7	16172300	16173521		chr1	25336996	25338130		chr1	48771570	48772103		chr10	23619529	23620141
chr7	16487799	16490081		chr1	25338491	25340232		chr1	48775503	48776486		chr10	23655120	23655670
chr7	16572899	16574483		chr1	25341464	25343395		chr1	48778681	48779811		chr10	23716129	23716646
chr7	17992683	17993912		chr1	25349458	25350930		chr1	48781036	48782274		chr10	24018005	24018547
chr7	19921085	19924555		chr1	25569922	25572019		chr1	48802192	48803584		chr10	24161506	24162000
chr7	19963764	19965970		chr1	25583817	25585554		chr1	48831596	48832095		chr10	24183045	24183754
chr7	21494636	21496020		chr1	25632421	25633129		chr1	48871130	48871762		chr10	24202292	24202772
chr7	21748970	21750493		chr1	25678989	25680102		chr1	48884806	48885317		chr10	24372067	24372626
chr7	22556727	22558365		chr1	25747876	25749172		chr1	48974808	48975694		chr10	24445566	24446032
chr7	24772427	24774245		chr1	25766553	25767680		chr1	49255473	49255903		chr10	24451339	24451839
chr7	24973329	24975556		chr1	25857533	25858108		chr1	49301523	49302020		chr10	24648235	24648704
chr7	25295648	25298123		chr1	25918253	25918900		chr1	49317112	49318383		chr10	24814782	24815285
chr7	25375060	25376783		chr1	25955490	25956606		chr1	49323997	49325213		chr10	25090379	25090943
chr7	25594795	25596233		chr1	26250680	26251287		chr1	49332523	49333099		chr10	25096951	25097458
chr7	25608710	25611437		chr1	26367327	26368236		chr1	49336860	49338289		chr10	25138823	25139488
chr7	25834131	25835857		chr1	26526039	26526805		chr1	49351139	49351841		chr10	25182873	25183462
chr7	26631750	26633891		chr1	26617749	26618676		chr1	49354654	49355461		chr10	25246515	25247210
chr7	26709988	26715136		chr1	26792879	26794022		chr1	49364257	49365184		chr10	25322119	25322654
chr7	26716749	26718245		chr1	26919727	26921411		chr1	49404922	49405556		chr10	25401192	25401726
chr7	27193372	27195071		chr1	26970953	26971937		chr1	49412862	49413518		chr10	25430269	25430973
chr7	27695640	27698485		chr1	27068849	27069407		chr1	49721188	49721818		chr10	25472149	25473021
chr7	29044678	29047946		chr1	27166909	27167469		chr1	49748903	49749358		chr10	25476171	25476748
chr7	29693763	29696344		chr1	27241648	27242859		chr1	49762816	49763483		chr10	25485513	25486541
chr7	29826532	29828577		chr1	27404807	27405337		chr1	49788735	49789626		chr10	25507600	25508254
chr7	30164206	30166018		chr1	27450397	27451198		chr1	49790476	49791471		chr10	25511195	25512141
chr7	30609465	30611857		chr1	27579112	27580891		chr1	49794728	49795332		chr10	25584230	25585143
chr7	30613777	30615899		chr1	27585701	27586937		chr1	49802543	49803003		chr10	25661130	25661830
chr7	30728738	30731200		chr1	27599148	27600062		chr1	49805307	49807050		chr10	25677369	25679227
chr7	31111997	31113880		chr1	27609049	27610636		chr1	49814936	49816238		chr10	25693330	25694912
chr7	31291620	31295705		chr1	27611459	27613118		chr1	49818249	49819237		chr10	25705924	25706918
chr7	31572099	31575761		chr1	27632885	27633915		chr1	49837964	49839161		chr10	25713018	25714746
chr7	31678587	31680855		chr1	27697573	27698236		chr1	49839207	49839866		chr10	25822078	25823124
chr7	31942054	31944215		chr1	27820416	27822746		chr1	49850116	49850637		chr10	25933619	25934096
chr7	33341782	33345931		chr1	27823246	27824084		chr1	49865504	49866986		chr10	25937193	25937622
chr7	33712075	33714007		chr1	27892434	27893253		chr1	49942344	49942942		chr10	26144514	26145133
chr7	33925433	33927777		chr1	27920150	27920675		chr1	49942975	49943711		chr10	26158736	26159407
chr7	34270138	34271787		chr1	28373325	28374925		chr1	50084399	50084952		chr10	26201627	26202702
chr7	35282944	35286245		chr1	28478592	28479741		chr1	50196385	50196916		chr10	26203735	26204152
chr7	35817726	35819916		chr1	28646450	28647969		chr1	50270311	50270709		chr10	26212370	26212957
chr7	37122205	37123915		chr1	28649557	28650636		chr1	50324038	50324489		chr10	26314607	26315165
chr7	37818910	37820301		chr1	28677888	28681127		chr1	50461155	50461714		chr10	26326048	26326756
chr7	38222620	38225289		chr1	28692913	28693632		chr1	50475188	50475710		chr10	26395774	26396485
chr7	38315382	38319313		chr1	28737618	28738400		chr1	50662576	50663459		chr10	26398591	26399540
chr7	38322029	38324052		chr1	28783082	28785784		chr1	50668444	50669049		chr10	26406460	26407540
chr7	39011549	39013893		chr1	28793148	28794828		chr1	50702555	50703797		chr10	26414338	26415235
chr7	40827405	40830275		chr1	28800163	28803886		chr1	50707448	50708287		chr10	26443827	26445247
chr7	40924202	40925984		chr1	28812472	28813337		chr1	50846313	50846882		chr10	26451683	26453005
chr7	41120526	41123852		chr1	28813870	28816680		chr1	50850729	50851176		chr10	26552291	26552725
chr7	41233062	41235443		chr1	28879829	28880546		chr1	50860281	50861446		chr10	26818564	26819110
chr7	41393420	41395479		chr1	29281555	29283066		chr1	50862542	50863394		chr10	26824178	26825110
chr7	41396259	41397987		chr1	29389952	29393109		chr1	50883006	50883635		chr10	26938432	26939003
chr7	41731625	41733983		chr1	29403331	29404847		chr1	51058259	51059152		chr10	27086429	27086940
chr7	42586070	42587482		chr1	29406677	29408522		chr1	51059281	51059782		chr10	27728539	27729312
chr7	42591922	42596840		chr1	29413920	29414904		chr1	51059960	51060579		chr10	27730149	27730796
chr7	42785303	42788143		chr1	29416538	29418260		chr1	51105829	51106325		chr10	27777791	27778301
chr7	42854990	42857989		chr1	29433685	29434547		chr1	51171839	51173678		chr10	28310617	28311402
chr7	43049338	43051135		chr1	29438660	29441722		chr1	51204975	51205802		chr10	28385003	28385858
chr7	43177003	43179956		chr1	29443050	29448763		chr1	51218879	51219397		chr10	28486329	28486952
chr7	43542395	43544035		chr1	29457031	29457916		chr1	51280526	51280963		chr10	28521708	28522241
chr7	44058229	44064009		chr1	29471863	29472546		chr1	51283640	51284933		chr10	28544926	28545339
chr7	44076949	44079941		chr1	29474533	29480018		chr1	51286338	51287002		chr10	28646028	28646552
chr7	44173455	44176059		chr1	29484713	29486891		chr1	51288016	51288486		chr10	28751398	28751817
chr7	44351861	44355930		chr1	29562772	29564297		chr1	51290197	51292029		chr10	28825693	28826290
chr7	46437642	46439727		chr1	29601482	29605000		chr1	51293233	51294613		chr10	29055929	29056601
chr7	46445317	46447872		chr1	29605539	29606284		chr1	51298068	51299859		chr10	29092092	29092768
chr7	46587352	46589051		chr1	29612487	29613819		chr1	51306077	51307326		chr10	29137206	29137718
chr7	46825055	46827002		chr1	29615667	29616914		chr1	51366590	51367119		chr10	29153284	29153767
chr7	48242141	48244027		chr1	29656933	29657808		chr1	51376916	51377580		chr10	29181518	29182301
chr7	48346895	48349944		chr1	29691832	29692402		chr1	51656711	51657221		chr10	29327835	29328670
chr7	49225394	49229029		chr1	29693191	29694667		chr1	51673644	51674296		chr10	29346858	29347398
chr7	49519304	49520894		chr1	29737034	29739216		chr1	51734418	51735165		chr10	29368699	29369286
chr7	49881708	49883311		chr1	29742661	29743362		chr1	51819000	51819771		chr10	29437151	29437704
chr7	49926018	49928752		chr1	30065734	30066296		chr1	51891186	51892176		chr10	29463626	29465119
chr7	50154517	50156234		chr1	30455759	30456974		chr1	52114555	52114988		chr10	29481690	29482127
chr7	50187010	50188954		chr1	31104075	31105643		chr1	52150747	52151692		chr10	29491802	29492817
chr7	50848564	50850302		chr1	31105769	31106906		chr1	52206449	52207013		chr10	29520617	29521177
chr7	51250801	51253202		chr1	31157470	31158069		chr1	52547324	52547973		chr10	29529455	29530003
chr7	51388269	51390410		chr1	31159352	31160053		chr1	52567775	52568497		chr10	29532223	29533657
chr7	51544377	51546826		chr1	31164573	31166152		chr1	52568594	52568965		chr10	29540299	29541219
chr7	51555702	51557548		chr1	31173238	31174883		chr1	52593761	52594287		chr10	29559393	29563755
chr7	51557772	51560731		chr1	31217864	31219392		chr1	52610772	52611511		chr10	29583401	29583865
chr7	51646227	51648531		chr1	31230002	31231330		chr1	52826072	52826668		chr10	29600042	29600438
chr7	52490501	52495452		chr1	31375806	31376906		chr1	52893221	52893876		chr10	29608842	29609344
chr7	52514254	52516176		chr1	31464528	31465360		chr1	53376929	53377439		chr10	29611536	29612623
chr7	56003177	56005224		chr1	31468169	31469021		chr1	53433769	53435167		chr10	29633151	29633784
chr7	56758400	56761609		chr1	31473229	31474092		chr1	53465812	53466442		chr10	29639821	29640658
chr7	56790955	56794078		chr1	31650733	31651306		chr1	53619865	53620339		chr10	29691589	29692319
chr7	56812520	56813610		chr1	31657301	31658184		chr1	53762230	53762853		chr10	29840559	29841166
chr7	56824852	56831406		chr1	31858811	31859572		chr1	53862685	53863493		chr10	29944185	29944809
chr7	56833972	56835889		chr1	32499218	32501097		chr1	53891206	53891751		chr10	30046547	30047117
chr7	56844421	56847028		chr1	33122652	33123404		chr1	54017747	54020236		chr10	30061545	30062329
chr7	56867062	56869546		chr1	33124253	33124808		chr1	54087430	54088498		chr10	30073242	30073939
chr7	56880060	56883411		chr1	33128982	33129858		chr1	54552353	54553530		chr10	30097495	30098268
chr7	58035520	58037516		chr1	33130470	33131327		chr1	54982175	54982717		chr10	30143594	30144267
chr7	58355191	58357817		chr1	33825800	33826277		chr1	55318314	55318872		chr10	30159153	30160055
chr7	58435649	58438165		chr1	34005560	34006364		chr1	55325683	55326530		chr10	30207427	30208908
chr7	58587937	58591102		chr1	34036162	34037074		chr1	55462107	55462593		chr10	30252444	30253032
chr7	58715387	58717574		chr1	34100063	34100640		chr1	55464552	55465528		chr10	30360506	30361024
chr7	58808943	58811534		chr1	34207460	34207960		chr1	55811448	55811946		chr10	30447345	30447989
chr7	58885395	58889123		chr1	34534481	34535677		chr1	55887995	55888517		chr10	30457416	30458082
chr7	59269249	59272418		chr1	34695839	34696296		chr1	55978479	55979108		chr10	30463311	30463710
chr7	60402738	60404221		chr1	34722781	34724136		chr1	56053055	56053633		chr10	30481283	30481766
chr7	62271135	62272753		chr1	34980300	34981203		chr1	56060167	56060882		chr10	30527177	30527624
chr7	65250109	65252680		chr1	34988444	34990077		chr1	56072100	56072628		chr10	30793363	30794121
chr7	67944179	67946775		chr1	35020283	35020877		chr1	56078223	56078762		chr10	30871689	30872196
chr7	68849173	68851092		chr1	35031247	35031998		chr1	56289901	56290334		chr10	31024659	31025374
chr7	69456041	69458121		chr1	35041250	35041600		chr1	56955094	56955843		chr10	31042521	31043463
chr7	72170284	72171900		chr1	35043886	35044545		chr1	56961466	56962257		chr10	31454823	31455369
chr7	73321432	73323149		chr1	35073531	35074472		chr1	56975832	56976936		chr10	31457190	31458076
chr7	73733717	73734669		chr1	35365185	35366652		chr1	56983061	56983710		chr10	31461178	31462111
chr7	73974766	73977465		chr1	35371774	35372769		chr1	57988808	57989545		chr10	31471276	31472413
chr7	74740936	74743162		chr1	35372871	35373983		chr1	58112169	58112777		chr10	31488000	31488602
chr7	75462578	75464832		chr1	35374283	35375256		chr1	58831442	58832022		chr10	31502292	31502865
chr7	76307489	76309956		chr1	35523481	35524677		chr1	59229142	59229780		chr10	31523821	31524397
chr8	8224653	8226545		chr1	35526674	35527572		chr10	59902	60330		chr10	31524772	31526298
chr8	9164643	9166402		chr1	35550559	35551125		chr10	66269	66862		chr10	31534392	31535166
chr8	9570521	9571929		chr1	35556448	35557703		chr10	69521	70176		chr10	31826886	31827518
chr8	9969800	9971306		chr1	35562034	35563332		chr10	76172	77244		chr10	31831407	31832052
chr8	11396229	11397238		chr1	35784051	35785118		chr10	85734	86242		chr10	32023729	32024718
chr8	12694821	12696973		chr1	35792467	35794057		chr10	116100	116573		chr10	32396790	32397305
chr8	13694459	13696415		chr1	35808274	35809092		chr10	124980	125436		chr10	32412168	32412678
chr8	14604894	14606316		chr1	35875725	35877197		chr10	200280	200817		chr10	32434109	32435645
chr8	15183307	15185499		chr1	35921863	35923337		chr10	219291	219755		chr10	32440885	32441420
chr8	15334939	15337809		chr1	35936776	35937446		chr10	245294	246143		chr10	32624563	32625252
chr8	16555410	16557043		chr1	36012803	36014108		chr10	284413	284898		chr10	32645322	32645894
chr8	16559886	16565122		chr1	36289913	36291035		chr10	289462	290383		chr10	32663177	32663876
chr8	17259864	17262214		chr1	36299885	36300783		chr10	501412	502094		chr10	32690520	32690989
chr8	17818379	17822512		chr1	36316293	36317652		chr10	606464	607641		chr10	32695882	32696399
chr8	18940448	18945280		chr1	36318435	36320217		chr10	608014	608679		chr10	33183363	33183926
chr8	19463551	19465934		chr1	36322353	36323622		chr10	610493	611443		chr10	33384887	33385472
chr8	20462359	20465851		chr1	36378824	36379608		chr10	619376	620089		chr10	33473180	33473839
chr8	21137397	21139848		chr1	36390067	36390893		chr10	625801	626940		chr10	33512913	33513477
chr8	22067627	22069501		chr1	36415341	36416499		chr10	627285	627756		chr10	33592601	33593058
chr8	24010396	24012744		chr1	36449169	36449511		chr10	637065	637879		chr10	33649919	33650620
chr8	24034680	24036121		chr1	36459336	36460024		chr10	640251	640728		chr10	33652160	33653118
chr8	24947959	24950752		chr1	36465432	36466325		chr10	650109	650953		chr10	33671573	33672130
chr8	25906385	25908603		chr1	36466884	36468441		chr10	672662	673420		chr10	33753937	33754559
chr8	26159591	26162983		chr1	36476824	36477663		chr10	691084	691652		chr10	33756913	33757470
chr8	27108651	27111076		chr1	36616156	36617614		chr10	735352	735771		chr10	33774822	33775452
chr8	27143279	27144338		chr1	36650401	36651604		chr10	836552	837118		chr10	34095368	34095892
chr8	27589695	27595730		chr1	36679080	36679868		chr10	935984	937092		chr10	34852921	34853467
chr8	27607920	27610864		chr1	36688327	36690553		chr10	945735	946193		chr10	34889200	34890405
chr8	29395834	29398693		chr1	36730831	36731905		chr10	1048392	1048846		chr10	34901028	34901592
chr8	29482346	29485102		chr1	36737585	36738173		chr10	1321695	1322439		chr10	34920441	34921165
chr8	29501527	29503131		chr1	36747890	36748648		chr10	1383266	1383847		chr10	34998022	34998532
chr8	29887859	29889297		chr1	36752834	36754893		chr10	1399174	1400407		chr10	35146776	35147350
chr8	30701686	30705378		chr1	36763749	36765380		chr10	1400601	1401133		chr10	35495746	35496519
chr8	31733136	31735167		chr1	36767048	36768357		chr10	1408551	1409047		chr10	35519196	35520059
chr8	32022597	32024930		chr1	36805094	36805894		chr10	1416576	1417538		chr10	35526494	35527454
chr8	32608864	32610543		chr1	36810501	36812314		chr10	1421706	1423451		chr10	35932537	35933206
chr8	33281949	33284160		chr1	36816031	36816673		chr10	2098922	2100288		chr10	35935518	35936135
chr8	33374636	33376828		chr1	36847944	36848699		chr10	2186109	2186937		chr10	36071299	36071885
chr8	33467045	33472079		chr1	36883846	36884844		chr10	2246720	2247175		chr10	36095394	36096407
chr8	34648003	34650118		chr1	36890168	36890967		chr10	2252502	2253545		chr10	36136620	36137216
chr8	35196929	35201825		chr1	36905258	36906202		chr10	2304691	2305481		chr10	36455953	36456474
chr8	36332453	36334707		chr1	36982521	36983611		chr10	2319732	2320590		chr10	36458342	36458798
chr8	40170119	40172928		chr1	37015894	37017386		chr10	2361854	2362838		chr10	36462654	36463658
chr8	40585439	40587297		chr1	37021334	37023821		chr10	2430117	2431065		chr10	36529948	36530511
chr8	40761340	40762920		chr1	37024097	37025879		chr10	2664846	2666095		chr10	36592638	36593539
chr8	43401177	43402642		chr1	37125196	37127118		chr10	2669473	2669955		chr10	36626184	36627114
chr8	43701359	43703131		chr1	37262984	37263554		chr10	2709241	2709793		chr10	36637581	36638019
chr8	43849087	43851099		chr1	37265400	37266677		chr10	2721000	2722457		chr10	36645876	36646405
chr8	44246240	44247775		chr1	37292090	37292799		chr10	2999895	3000668		chr10	36647164	36647629
chr8	45593788	45597894		chr1	37294139	37295460		chr10	4106798	4108244		chr10	36673577	36674218
chr8	45824924	45826732		chr1	37302754	37303712		chr10	4110428	4110937		chr10	36941010	36941750
chr8	47604384	47606535		chr1	37305321	37306852		chr10	4148309	4149096		chr10	37135758	37136545
chr8	47710900	47712987		chr1	37308838	37310537		chr10	4161079	4162239		chr10	37138141	37138768
chr8	48239120	48240954		chr1	37320447	37322475		chr10	4164349	4165235		chr10	37298878	37299575
chr8	49248568	49249919		chr1	37324213	37325937		chr10	4167913	4168859		chr10	37349561	37350353
chr8	50465731	50467571		chr1	37337348	37338506		chr10	4171136	4171836		chr10	37352008	37352639
chr8	52201273	52203526		chr1	37342885	37343461		chr10	4182771	4184268		chr10	37381996	37382573
chr8	52672259	52676723		chr1	37357447	37358170		chr10	4374444	4375235		chr10	37603350	37604135
chr8	52811824	52813615		chr1	37602777	37604123		chr10	4572188	4572902		chr10	37703416	37704041
chr8	53263964	53265560		chr1	37609070	37610555		chr10	4574494	4575281		chr10	37754528	37755190
chr8	54971230	54973225		chr1	37611367	37612492		chr10	4823910	4824514		chr10	37757258	37757988
chr9	285359	287372		chr1	37616587	37617082		chr10	4842177	4843100		chr10	37833535	37834122
chr9	879694	880935		chr1	37642850	37643693		chr10	4848090	4849275		chr10	37863415	37863954
chr9	961038	963512		chr1	37709799	37710899		chr10	4861012	4861473		chr10	37870318	37871258
chr9	1029996	1031749		chr1	37731784	37733057		chr10	4893748	4895076		chr10	37949393	37950202
chr9	1675659	1677120		chr1	37930149	37930764		chr10	4904025	4904731		chr10	37973795	37974390
chr9	3633373	3635173		chr1	37933314	37933890		chr10	4918676	4919572		chr10	38045174	38045758
chr9	4697891	4699516		chr1	37984712	37986004		chr10	4920743	4921432		chr10	38084989	38085890
chr9	4732460	4734770		chr1	38006752	38007540		chr10	4930763	4931149		chr10	38159280	38159814
chr9	5387493	5389672		chr1	38025679	38026818		chr10	4955213	4955717		chr10	38472482	38472930
chr9	6262478	6264379		chr1	38026979	38028262		chr10	4978929	4979557		chr10	39411278	39411847
chr9	7319307	7321691		chr1	38033334	38035616		chr10	4998848	4999661		chr10	39723547	39724106
chr9	8576045	8578130		chr1	38085655	38086659		chr10	5080777	5081839		chr10	39821004	39821548
chr9	9045317	9048956		chr1	38168410	38169233		chr10	5094918	5095753		chr10	40073508	40074233
chr9	9404780	9407243		chr1	38176535	38177300		chr10	5098454	5099022		chr10	40088680	40089397
chr9	9495376	9499977		chr1	38182734	38183428		chr10	5101258	5103169		chr10	40385159	40385802
chr9	9976271	9978465		chr1	38184806	38186074		chr10	5136165	5136696		chr10	40436447	40436936
chr9	9981186	9984182		chr1	38190070	38190871		chr10	5148184	5148815		chr10	40470194	40471293
chr9	9985218	9990404		chr1	38210332	38210898		chr10	5570539	5571458		chr10	40497325	40498177
chr9	10008594	10009964		chr1	38213006	38214207		chr10	5576415	5577000		chr10	40519556	40520423
chr9	11602399	11603880		chr1	38216188	38217585		chr10	5582226	5584165		chr10	40522556	40523624
chr9	11656908	11662022		chr1	38271920	38273724		chr10	5594734	5595828		chr10	40524402	40525089
chr9	11914726	11916472		chr1	38279842	38280627		chr10	5614697	5615250		chr10	41006447	41007170
chr9	12345431	12346985		chr1	38473064	38473624		chr10	5629035	5629539		chr10	41269684	41270237
chr9	12370934	12373025		chr1	39023983	39024785		chr10	5632717	5633735		chr10	41381889	41382526
chr9	13022317	13024857		chr1	39044308	39045448		chr10	5701222	5702165		chr10	41428135	41428526
chr9	13810995	13814328		chr1	39056327	39057849		chr10	5720847	5721448		chr10	41547839	41548391
chr9	13984743	13987051		chr1	39060174	39061148		chr10	5725311	5726471		chr10	41550687	41551282
chr9	14025280	14028266		chr1	39063136	39065413		chr10	5733858	5734499		chr10	41811451	41812294
chr9	14155516	14165911		chr1	39075109	39077248		chr10	5736665	5737563		chr10	41813727	41814860
chr9	16404054	16406404		chr1	39079301	39080523		chr10	5742807	5744176		chr10	41814914	41815637
chr9	17189838	17195534		chr1	39083111	39084428		chr10	5750380	5751153		chr10	41975791	41976278
chr9	17304446	17305946		chr1	39086998	39087596		chr10	5995479	5995968		chr10	42242900	42243525
chr9	17587776	17589148		chr1	39090555	39092063		chr10	6411813	6413604		chr10	42557785	42558260
chr9	17834253	17836298		chr1	39095652	39096268		chr10	6510169	6510788		chr10	42566456	42567706
chr9	18090648	18092193		chr1	39096329	39097282		chr10	6622930	6623432		chr10	42573517	42574475
chr9	18094048	18095471		chr1	39098627	39099246		chr10	6656218	6656814		chr10	42595448	42596508
chr9	19699612	19702359		chr1	39101815	39103089		chr10	6662140	6663539		chr10	42599069	42599978
chr9	20572283	20575840		chr1	39107799	39109487		chr10	6678085	6679155		chr10	42689965	42690535
chr9	20994831	20996300		chr1	39111875	39112503		chr10	6717062	6717678		chr10	42788793	42789211
chr9	21914459	21916226		chr1	39146559	39147248		chr10	7295693	7296372		chr10	43286739	43287584
chr9	21916579	21919289		chr1	39152593	39153259		chr10	7521997	7522608		chr10	43323181	43323798
chr9	22446506	22448009		chr1	39153613	39154470		chr10	7550058	7550809		chr10	43422944	43423474
chr9	22560558	22562610		chr1	39161673	39163984		chr10	7555384	7556087		chr11	10642	11236
chr9	22701648	22705317		chr1	39164059	39165478		chr10	7856422	7856917		chr11	104885	105477
chr9	22807610	22811164		chr1	39189042	39189934		chr10	8078968	8079438		chr11	200481	201130
chr9	23653301	23654665		chr1	39193307	39193907		chr10	8102634	8103013		chr11	293131	293679
chr9	24799552	24802141		chr1	39206944	39207728		chr10	8104593	8105262		chr11	330585	331556
chr9	24804771	24806125		chr1	39277700	39278596		chr10	8140902	8141660		chr11	355262	355768
chr9	24878208	24880011		chr1	39395418	39396264		chr10	8162521	8162940		chr11	433636	434194
chr9	25135441	25137903		chr1	39424739	39426184		chr10	8424776	8425858		chr11	497811	498575
chr9	25139753	25141521		chr1	39430783	39433696		chr10	8535541	8536258		chr11	501908	502448
chr9	25141671	25144107		chr1	39435302	39436480		chr10	8554478	8555050		chr11	509731	510304
chr9	25219516	25222190		chr1	39436881	39437663		chr10	8755973	8756741		chr11	518930	519555
chr9	25488611	25492224		chr1	39515981	39516791		chr10	8783017	8783747		chr11	523255	523816
chr9	25567870	25569721		chr1	39580571	39581057		chr10	8812664	8813182		chr11	528892	530690
chr9	25814956	25817130		chr1	39587841	39588759		chr10	8867509	8869027		chr11	722605	723047
chr9	26128392	26130085		chr1	39591547	39593674		chr10	8917558	8918966		chr11	787621	788065
chr9	26682574	26686963		chr1	39645819	39649267		chr10	8930179	8931397		chr11	969232	970572
chr9	26695607	26696950		chr1	39656150	39657568		chr10	8934807	8935954		chr11	977071	978020
chr9	26909812	26911901		chr1	39659984	39660778		chr10	8948229	8948750		chr11	1009007	1009838
chr9	27092128	27094016		chr1	39663074	39665204		chr10	8948982	8949511		chr11	1300421	1301019
chr9	27731996	27735063		chr1	39740504	39741191		chr10	8950810	8951488		chr11	1320439	1320920
chr9	28278806	28280193		chr1	39809261	39810536		chr10	8980869	8981496		chr11	1458234	1458677
chr9	28474136	28476773		chr1	39828399	39829055		chr10	9050708	9051884		chr11	1464665	1465318
chr9	29882079	29884777		chr1	40063784	40065647		chr10	9064325	9065294		chr11	1472717	1473408
chr9	30280032	30281492		chr1	40067804	40068580		chr10	9125696	9126232		chr11	1746899	1747290
chr9	31223887	31226312		chr1	40077672	40078467		chr10	9134367	9134848		chr11	1888369	1888986
chr9	31704193	31706291		chr1	40081741	40082415		chr10	9461963	9462547		chr11	2078749	2079517
chr9	31871305	31874594		chr1	40113653	40115467		chr10	9468116	9469311		chr11	2084699	2085310
chr9	32925871	32928011		chr1	40116685	40117356		chr10	9564319	9565082		chr11	2210794	2211332
chr9	33127810	33129319		chr1	40201117	40201957		chr10	9671121	9671590		chr11	2270059	2270780
chr9	34008762	34011945		chr1	40314356	40316310		chr10	9739583	9740473		chr11	2305136	2305633
chr9	34929858	34931990		chr1	40317705	40318764		chr10	9940439	9940944		chr11	2488427	2488975
chr9	34978727	34982093		chr1	40327957	40329358		chr10	10008820	10009414		chr11	2566498	2567085
chr9	36920920	36926460		chr1	40330668	40331666		chr10	10055518	10056635		chr11	2576811	2577391
chr9	37009415	37012334		chr1	40336515	40337135		chr10	10125989	10126774		chr11	2619376	2619921
chr9	37016831	37020615		chr1	40356646	40357225		chr10	10143562	10144072		chr11	2700682	2701219
chr9	37675929	37677610		chr1	40362377	40364358		chr10	10146493	10147351		chr11	2708932	2709549
chr9	37834611	37837186		chr1	40396005	40398163		chr10	10152801	10154739		chr11	2710776	2711718
chr9	38036325	38038866		chr1	40428788	40430109		chr10	10158614	10159944		chr11	2714234	2714914
chr9	38316210	38318253		chr1	40443310	40444408		chr10	10188140	10188637		chr11	2720418	2721439
chr9	39615886	39617307		chr1	40766648	40767199		chr10	10246501	10247413		chr11	2731798	2733193
chr9	40220159	40222122		chr1	40784143	40784918		chr10	10445901	10446369		chr11	2748353	2749323
chr9	40351358	40354571		chr1	40822639	40823516		chr10	10571983	10572482		chr11	3233907	3234773
chr9	40382948	40384832		chr1	40859054	40859777		chr10	10759465	10760384		chr11	3240061	3240473
chr9	40457260	40459903		chr1	40878871	40879443		chr10	10794791	10795851		chr11	3451820	3452475
chr9	40830797	40835003		chr1	40934887	40935580		chr10	10864131	10864528		chr11	3471081	3471604
chr9	40909421	40913275		chr1	40935818	40936772		chr10	10872025	10873263		chr11	3510524	3511258
chr9	41613452	41615796		chr1	40944637	40945346		chr10	10890951	10892452		chr11	3513847	3514647
chr9	41709271	41710754		chr1	40955754	40956731		chr10	11061131	11061894		chr11	3616516	3617011
chr9	41871129	41873333		chr1	40992031	40992467		chr10	11247390	11248092		chr11	3617919	3618433
chr9	41906946	41910220		chr1	41149514	41150824		chr10	11250731	11251674		chr11	3819389	3820035
chr9	41920022	41921817		chr1	41216816	41217723		chr10	11355427	11355959		chr11	3830345	3830971
chr9	42123332	42124529		chr1	41298217	41298841		chr10	11408748	11409430		chr11	4230628	4231195
chr9	42350641	42354049		chr1	41546361	41548181		chr10	11421406	11422610		chr11	4242271	4243024
chr9	42355288	42359945		chr1	41553507	41553980		chr10	11424689	11426001		chr11	4376487	4377027
chr9	42688218	42689834		chr1	41554072	41555744		chr10	11431186	11433888		chr11	4510720	4511648
chr9	42967421	42971787		chr1	41784703	41785340		chr10	11433891	11435888		chr11	4522089	4522631
[truncated: 22,610 more rows]

## Sheet: Table_S3
Zv8_NA1016	109849	110230
Zv8_NA1016	110556	111503
Zv8_NA1016	113606	115188			File	Differentially H3K27 acetylated regions
Zv8_NA1016	120008	121680			Stages	Dome VS 80% epiboly
Zv8_NA1016	123156	124200			cut-off (q value)	0.05
Zv8_NA1016	134470	136700			cut-off (fold difference in tag number)	4
Zv8_NA10202	1703	3041
Zv8_NA10325	28091	28988
Zv8_NA10559	1	694
Zv8_NA10704	56642	57384
Zv8_NA10729	19479	20623
Zv8_NA10729	21793	23150
Zv8_NA10766	14413	15516
Zv8_NA110	42503	43104
Zv8_NA11329	60860	62001
Zv8_NA127	94591	95544
Zv8_NA127	97187	97896
Zv8_NA127	104283	105326
Zv8_NA1380	119345	121247
Zv8_NA151	4633	5982
Zv8_NA160	90559	92039
Zv8_NA1642	40175	40835
Zv8_NA1664	52878	53956
Zv8_NA1664	62666	63390
Zv8_NA1664	73054	73865
Zv8_NA1715	34658	35833
Zv8_NA1946	17797	18518
Zv8_NA1958	82411	82852
Zv8_NA2004	1065	1539
Zv8_NA2032	58515	59536
Zv8_NA2043	1437	1825
Zv8_NA2081	27286	28357
Zv8_NA2081	61499	62070
Zv8_NA2096	43352	44246
Zv8_NA2116	13861	14526
Zv8_NA2168	13532	14630
Zv8_NA2181	159	2341
Zv8_NA2254	62734	64859
Zv8_NA2271	62977	63422
Zv8_NA2274	53836	55270
Zv8_NA2278	37455	38020
Zv8_NA2308	49677	53042
Zv8_NA2350	99103	100086
Zv8_NA2353	29410	30629
Zv8_NA2365	69562	70380
Zv8_NA2365	73342	74154
Zv8_NA237	571	1433
Zv8_NA2446	7989	9580
Zv8_NA2538	75960	77728
Zv8_NA2543	46322	47532
Zv8_NA2543	64733	65748
Zv8_NA2543	69800	71416
Zv8_NA2545	4755	5127
Zv8_NA2545	19792	20313
Zv8_NA2576	23162	23757
Zv8_NA2599	8885	9953
Zv8_NA2623	100505	101260
Zv8_NA2627	53003	54152
Zv8_NA2640	1873	4201
Zv8_NA2641	53031	55746
Zv8_NA2733	3314	4020
Zv8_NA2733	57175	58072
Zv8_NA2733	90216	92701
Zv8_NA2749	27216	28126
Zv8_NA2750	3399	4318
Zv8_NA2811	9192	10416
Zv8_NA2878	71473	72770
Zv8_NA2930	78685	79925
Zv8_NA2947	43667	44831
Zv8_NA2987	33668	35107
Zv8_NA2993	123361	123767
Zv8_NA3044	12685	13634
Zv8_NA3060	25051	25777
Zv8_NA3065	21685	22406
Zv8_NA3065	33960	34959
Zv8_NA3068	10320	10679
Zv8_NA3075	28	3754
Zv8_NA3085	12795	13622
Zv8_NA3087	21459	22465
Zv8_NA3125	17898	18402
Zv8_NA3126	47375	48045
Zv8_NA3126	130325	134285
Zv8_NA3126	145618	146290
Zv8_NA3126	151384	152282
Zv8_NA3126	153336	154769
Zv8_NA3126	158720	160073
Zv8_NA3163	18548	18924
Zv8_NA3215	15572	18042
Zv8_NA3223	3829	4290
Zv8_NA3223	7085	7668
Zv8_NA3234	6751	8596
Zv8_NA3234	25388	26903
Zv8_NA3235	2997	3565
Zv8_NA3249	25778	26656
Zv8_NA3309	22877	23369
Zv8_NA3328	122528	124655
Zv8_NA3328	286514	287430
Zv8_NA3360	106	954
Zv8_NA3360	3232	4201
Zv8_NA3412	12279	13132
Zv8_NA3412	42455	43114
Zv8_NA3557	5124	5679
Zv8_NA3610	49817	50908
Zv8_NA3665	5061	7392
Zv8_NA3699	8826	9167
Zv8_NA3704	38028	38571
Zv8_NA3725	24695	26001
Zv8_NA3748	53893	55451
Zv8_NA3752	33183	36293
Zv8_NA3754	41763	43041
Zv8_NA3779	14371	15360
Zv8_NA3883	8775	10076
Zv8_NA3883	83071	86579
Zv8_NA3883	88896	89460
Zv8_NA3883	116502	117017
Zv8_NA3883	145605	146196
Zv8_NA3899	87109	87475
Zv8_NA3921	36804	37278
Zv8_NA3924	37869	38788
Zv8_NA3984	101183	101817
Zv8_NA3984	103367	105389
Zv8_NA4006	48527	50564
Zv8_NA4102	30046	30780
Zv8_NA4102	33257	35238
Zv8_NA416	36611	36859
Zv8_NA4181	77556	79495
Zv8_NA4206	4971	5999
Zv8_NA4212	45638	46250
Zv8_NA4212	89360	90023
Zv8_NA4228	3710	4323
Zv8_NA4261	23422	23943
Zv8_NA4264	22431	23580
Zv8_NA4272	13412	15514
Zv8_NA4370	99597	100033
Zv8_NA4370	178707	179184
Zv8_NA4370	186801	188171
Zv8_NA4449	1480	1742
Zv8_NA4480	501	1498
Zv8_NA4480	73191	74100
Zv8_NA4489	29253	30439
Zv8_NA4490	48125	48940
Zv8_NA4561	88840	91793
Zv8_NA4561	104416	105680
Zv8_NA4561	106887	108060
Zv8_NA4561	112375	113214
Zv8_NA4570	5999	7353
Zv8_NA4579	105467	106113
Zv8_NA4666	103492	104817
Zv8_NA4763	39217	39571
Zv8_NA4845	182214	183584
Zv8_NA4900	17205	18401
Zv8_NA4983	50621	51601
Zv8_NA5200	30726	31343
Zv8_NA5209	51040	53030
Zv8_NA5209	53962	55330
Zv8_NA5209	149384	150181
Zv8_NA5218	20763	23148
Zv8_NA5218	27166	28973
Zv8_NA5228	7244	8194
Zv8_NA5455	6042	8014
Zv8_NA5536	79119	80666
Zv8_NA5604	58048	58550
Zv8_NA5605	23099	23699
Zv8_NA5623	7491	8551
Zv8_NA574	4342	4696
Zv8_NA578	5370	6491
Zv8_NA594	25887	26578
Zv8_NA5982	3463	7503
Zv8_NA5992	68	645
Zv8_NA6005	27588	28536
Zv8_NA6036	396739	398656
Zv8_NA6078	19035	19578
Zv8_NA6114	30913	33033
Zv8_NA6356	42868	44551
Zv8_NA6361	57144	57937
Zv8_NA6422	36391	37363
Zv8_NA654	775	1387
Zv8_NA6934	1206	2833
Zv8_NA707	19765	20525
Zv8_NA7111	3601	4144
Zv8_NA7327	11930	12205
Zv8_NA7415	204	896
Zv8_NA7513	72073	76266
Zv8_NA7693	5598	6353
Zv8_NA7693	10475	11402
Zv8_NA7823	9949	11635
Zv8_NA7823	47045	48962
Zv8_NA7823	109310	110478
Zv8_NA7823	129691	131200
Zv8_NA7849	4442	6339
Zv8_NA7986	13602	14423
Zv8_NA8152	316	795
Zv8_NA8209	81527	82233
Zv8_NA835	5629	7650
Zv8_NA8350	169422	171179
Zv8_NA839	45	1100
Zv8_NA841	11241	12371
Zv8_NA8543	1	1473
Zv8_NA8792	20785	21767
Zv8_NA8792	109792	110748
Zv8_NA8792	116688	117780
Zv8_NA8830	49872	50262
Zv8_NA9002	114405	115098
Zv8_NA9002	115588	118674
Zv8_NA9002	124139	124676
Zv8_NA9009	5807	6126
Zv8_NA9417	76038	76564
Zv8_NA9503	473	1943
Zv8_NA9565	9392	11045
Zv8_NA9839	38279	39579
Zv8_scaffold2966	155779	156441
Zv8_scaffold2972	16512	17082
Zv8_scaffold2972	20709	23290
Zv8_scaffold2974	41873	42840
Zv8_scaffold2974	45971	46835
Zv8_scaffold2974	61007	61734
Zv8_scaffold2985	170039	170623
Zv8_scaffold2998	13401	15879
Zv8_scaffold3011	31619	35451
Zv8_scaffold3013	104668	105060
Zv8_scaffold3015	136901	137443
Zv8_scaffold3021	246092	248238
Zv8_scaffold3025	42385	44376
Zv8_scaffold3025	162340	163051
Zv8_scaffold3025	230772	231286
Zv8_scaffold3025	578503	579235
Zv8_scaffold3025	580409	581223
Zv8_scaffold3025	653131	654001
Zv8_scaffold3025	685855	686706
Zv8_scaffold3026	56071	56568
Zv8_scaffold3026	72497	73892
Zv8_scaffold3026	81726	82365
Zv8_scaffold3026	89628	91696
Zv8_scaffold3026	93933	95241
Zv8_scaffold3026	102595	103652
Zv8_scaffold3026	107969	109075
Zv8_scaffold3026	141363	142104
Zv8_scaffold3026	158429	159131
Zv8_scaffold3027	25037	25784
Zv8_scaffold3028	17928	19271
Zv8_scaffold3028	106974	108177
Zv8_scaffold3028	137303	138335
Zv8_scaffold3028	444238	445130
Zv8_scaffold3028	447057	450611
Zv8_scaffold3029	208828	210479
Zv8_scaffold3029	272633	273409
Zv8_scaffold3029	278481	279632
Zv8_scaffold3029	282003	283464
Zv8_scaffold3029	288915	290076
Zv8_scaffold3029	302328	303468
Zv8_scaffold3029	309408	310658
Zv8_scaffold3032	22086	23321
Zv8_scaffold3034	166248	166682
Zv8_scaffold3038	156711	158042
Zv8_scaffold3041	150425	151483
Zv8_scaffold3041	308256	308795
Zv8_scaffold3041	453738	455094
Zv8_scaffold3049	372398	373696
Zv8_scaffold3061	195539	196585
Zv8_scaffold3062	68747	69571
Zv8_scaffold3071	187798	188924
Zv8_scaffold3086	78178	79128
Zv8_scaffold3086	137498	137941
Zv8_scaffold3088	104027	104747
Zv8_scaffold3103	206897	207916
Zv8_scaffold3103	211742	212406
Zv8_scaffold3106	34922	35438
Zv8_scaffold3112	183561	185125
Zv8_scaffold3114	212570	213169
Zv8_scaffold3117	6697	7453
Zv8_scaffold3121	245589	246567
Zv8_scaffold3123	117222	119277
Zv8_scaffold3123	301831	302835
Zv8_scaffold3123	350348	351615
Zv8_scaffold3125	26755	27697
Zv8_scaffold3127	122243	123078
Zv8_scaffold3127	128663	132580
Zv8_scaffold3127	137914	138686
Zv8_scaffold3127	167863	168424
Zv8_scaffold3127	176694	177214
Zv8_scaffold3127	185020	186262
chr1	699036	700381
chr1	1164720	1165588
chr1	1232513	1234907
chr1	3968902	3970123
chr1	4014435	4015242
chr1	4399618	4401650
chr1	4404405	4405476
chr1	4841508	4843623
chr1	4860830	4861702
chr1	4898454	4899445
chr1	4907069	4908233
chr1	5204777	5205290
chr1	6220785	6222017
chr1	7302081	7303339
chr1	7644343	7644802
chr1	7676933	7677513
chr1	7697095	7698130
chr1	7824930	7825463
chr1	7870615	7871498
chr1	9695923	9698179
chr1	10299260	10301648
chr1	10476762	10477314
chr1	10894970	10895722
chr1	11130049	11131570
chr1	12347303	12348280
chr1	12360864	12363068
chr1	12425951	12426956
chr1	14378671	14380691
chr1	14510536	14511373
chr1	15012180	15013107
chr1	15077566	15079202
chr1	15368127	15369491
chr1	15373263	15373900
chr1	15585923	15586468
chr1	15786627	15787374
chr1	15787400	15788474
chr1	15794165	15795720
chr1	15798518	15799426
chr1	15932013	15932815
chr1	15932993	15934674
chr1	16168349	16173569
chr1	16188390	16190063
chr1	16664338	16664834
chr1	16709493	16711106
chr1	16721797	16722639
chr1	16726859	16728884
chr1	16729410	16730305
chr1	16874403	16875313
chr1	16896142	16897880
chr1	16900227	16900784
chr1	16968572	16969654
chr1	17791577	17793228
chr1	17793285	17795505
chr1	17850672	17851411
chr1	18020470	18021465
chr1	18130671	18131151
chr1	18829299	18831067
chr1	19364760	19367558
chr1	20750092	20751265
chr1	20762475	20763698
chr1	20831536	20834585
chr1	21224801	21226087
chr1	21332588	21333199
chr1	22511268	22512166
chr1	22696326	22697922
chr1	22926835	22928316
chr1	23253463	23255017
chr1	23637118	23637945
chr1	23726658	23728472
chr1	23809646	23810983
chr1	24256610	24259034
chr1	24465582	24466954
chr1	24506505	24507214
chr1	25168771	25169401
chr1	25260587	25261285
chr1	25294260	25295882
chr1	25302470	25304916
chr1	25305230	25306257
chr1	25310928	25311921
chr1	25335834	25336632
chr1	25569922	25572019
chr1	25766553	25767680
chr1	26716329	26716807
chr1	26970803	26971956
chr1	27166909	27167469
chr1	27241648	27242859
chr1	27450397	27451604
chr1	27616800	27617387
chr1	27820416	27822746
chr1	27823246	27824084
chr1	27892434	27893253
chr1	28373325	28375049
chr1	28692913	28693632
chr1	29389952	29393109
chr1	29397539	29398383
chr1	29438660	29441722
chr1	29457031	29457916
chr1	29516030	29518938
chr1	29562772	29564297
chr1	31473229	31474092
chr1	31781324	31782404
chr1	33128982	33129858
chr1	35562034	35563332
chr1	35565156	35565828
chr1	36289879	36291035
chr1	36454911	36456032
chr1	36616156	36617614
chr1	36688327	36690553
chr1	36752834	36754893
chr1	36810459	36812314
chr1	37014851	37017872
chr1	37021334	37023821
chr1	37024097	37025879
chr1	37090985	37092354
chr1	37125099	37127118
chr1	37180419	37182502
chr1	37262984	37263554
chr1	38182734	38183428
chr1	38190070	38190871
chr1	38279842	38280627
chr1	38311162	38312439
chr1	38481850	38482584
chr1	38493800	38494640
chr1	38495603	38499054
chr1	39096329	39097282
chr1	39130679	39131280
chr1	39189042	39189934
chr1	39605227	39608295
chr1	40330668	40331666
chr1	40345919	40346407
chr1	40352987	40353622
chr1	40362154	40364358
chr1	40425744	40426380
chr1	40569200	40574849
chr1	40934887	40937620
chr1	42147918	42149071
chr1	42721386	42721853
chr1	43127369	43127821
chr1	43304889	43306364
chr1	43912687	43913864
chr1	44059574	44060178
chr1	44465468	44466133
chr1	44822566	44824704
chr1	45113162	45113780
chr1	45139320	45140946
chr1	46082049	46084350
chr1	46339484	46342155
chr1	46615667	46616188
chr1	47225064	47225673
chr1	47367785	47369562
chr1	47369901	47372795
chr1	47488404	47489381
chr1	47574314	47575527
chr1	47873550	47874711
chr1	48061127	48061913
chr1	48409378	48410066
chr1	48752950	48758164
chr1	48758412	48760833
chr1	48765249	48767276
chr1	48771570	48772103
chr1	48778681	48780309
chr1	48781036	48782274
chr1	48802192	48803584
chr1	49342252	49343018
chr1	49350404	49352821
chr1	49741913	49744586
chr1	49755575	49756127
chr1	49801970	49804162
chr1	49835502	49836179
chr1	49837935	49840264
chr1	49865117	49867194
chr1	49869018	49869945
chr1	50618719	50620027
chr1	50761990	50762999
chr1	50836600	50837825
chr1	51171839	51173854
chr1	51175677	51176967
chr1	51334088	51335337
chr1	51366590	51367119
chr1	51689941	51690823
chr1	51721041	51721613
chr1	51749191	51750674
chr1	52208267	52209011
chr1	52380598	52381299
chr1	53433257	53435200
chr1	53460762	53462921
chr1	53657599	53658169
chr1	53670145	53671463
chr1	54285657	54287424
chr1	54923868	54924646
chr1	55464552	55465528
chr1	56071837	56072672
chr1	56289230	56290674
chr1	56961466	56962257
chr10	85734	86242
chr10	618869	621086
chr10	625801	626940
chr10	935701	937535
chr10	1288323	1290392
chr10	1297182	1299178
chr10	1351248	1352078
chr10	1398230	1398875
chr10	2664846	2666095
chr10	2721000	2722457
chr10	4101812	4104750
chr10	4106788	4108461
chr10	4110428	4111743
chr10	4118141	4119353
chr10	4161079	4162674
chr10	4171136	4171836
chr10	4187114	4188128
chr10	4206963	4207742
chr10	4841860	4843126
chr10	5691781	5692325
chr10	5944525	5946739
chr10	6411813	6413604
chr10	6662140	6663736
chr10	7434669	7435259
chr10	7521997	7522608
chr10	7550058	7550809
chr10	8867509	8869201
chr10	9137761	9138763
chr10	9561852	9565619
chr10	9739583	9740473
chr10	10052222	10054298
chr10	10138183	10139606
chr10	10152801	10155014
chr10	10830559	10831899
chr10	10889290	10892452
chr10	10981268	10981995
chr10	11250731	11251814
chr10	11484487	11486688
chr10	12260067	12261579
chr10	12792051	12793720
chr10	12988311	12989351
chr10	13305762	13306421
chr10	13576851	13577653
chr10	13577694	13578977
chr10	13645122	13645659
chr10	13657580	13659422
chr10	13675642	13677569
chr10	13688326	13689142
chr10	14173552	14174572
chr10	14390445	14391377
chr10	15332875	15334626
chr10	15663898	15664995
chr10	15887528	15889312
chr10	15889776	15890651
chr10	15908062	15909047
chr10	16502956	16503619
chr10	16522872	16523660
chr10	16524790	16526178
chr10	16741438	16742824
chr10	16924814	16925461
chr10	16997555	17000104
chr10	17212816	17213486
chr10	17239825	17241585
chr10	17286564	17287118
chr10	17290463	17293216
chr10	17303022	17303667
chr10	18113540	18115549
chr10	19243215	19247843
chr10	20086559	20089635
chr10	20328478	20330371
chr10	20371221	20372527
chr10	21102057	21102720
chr10	21441121	21444898
chr10	21492804	21495628
chr10	21506291	21507352
chr10	22564393	22565311
chr10	22626773	22628594
chr10	22630403	22632959
chr10	22711715	22712375
chr10	22729259	22730108
chr10	22742372	22743568
chr10	22758189	22760300
chr10	22889329	22891077
chr10	22963557	22966051
chr10	22994448	22995908
chr10	23571111	23572321
chr10	23619001	23620451
chr10	23648139	23649842
chr10	23667459	23668843
chr10	23716129	23716646
chr10	23806180	23807095
chr10	24081297	24081941
chr10	24452738	24453770
chr10	24759874	24762138
chr10	25089936	25091606
chr10	25102219	25104038
chr10	25157231	25158657
chr10	25682024	25683598
chr10	26389227	26389977
chr10	26395774	26396485
chr10	26406460	26407540
chr10	26436376	26437921
chr10	26439361	26441268
chr10	26443587	26445866
chr10	26447031	26447899
chr10	26462250	26463234
chr10	27915352	27916646
chr10	28632948	28633525
chr10	28642744	28645089
chr10	29092092	29092768
chr10	29179308	29180360
chr10	29181164	29182815
chr10	29302894	29304010
chr10	29418970	29420442
chr10	29611121	29613098
chr10	29667582	29669043
chr10	30278277	30279055
chr10	30279224	30279769
chr10	30284785	30285920
chr10	30790062	30790659
chr10	30793144	30794233
chr10	31471276	31472413
chr10	31762847	31763618
chr10	32021497	32022341
chr10	32573962	32575082
chr10	33183287	33184151
chr10	33771745	33772641
chr10	33774822	33775452
chr10	34414046	34416553
chr10	34615239	34616279
chr10	34888523	34890872
chr10	34901028	34901592
chr10	35511847	35512488
chr10	35876863	35877418
chr10	36071299	36071885
chr10	36479125	36479979
chr10	36529816	36530648
chr10	36638318	36640227
chr10	36706687	36707607
chr10	36711408	36712359
chr10	36714887	36716018
chr10	36717828	36718564
chr10	37628276	37629031
chr10	37703416	37704041
chr10	37804222	37805157
chr10	38121435	38122041
chr10	39022488	39023731
chr10	40267995	40269552
chr10	40524242	40525261
chr10	41381889	41382526
chr10	41558960	41560178
chr10	42559125	42559757
chr10	42573347	42575207
chr10	42598784	42600161
chr10	43276618	43278173
chr10	43365036	43366212
chr10	43373992	43374893
chr11	30984	32547
chr11	341000	341796
chr11	463521	464284
chr11	487119	487876
chr11	1452039	1452563
chr11	1688899	1690301
chr11	2078030	2079861
chr11	2297045	2297555
chr11	2307881	2310540
chr11	2861680	2862349
chr11	3481050	3481780
chr11	3484188	3485384
chr11	3507140	3508789
chr11	3513847	3514647
chr11	3520085	3521023
chr11	4010498	4011367
chr11	4854372	4855328
chr11	4891672	4892328
chr11	4897565	4898870
chr11	5143912	5144577
chr11	6218001	6218569
chr11	6260308	6261560
chr11	6677375	6678470
chr11	6853181	6854412
chr11	7033943	7034584
chr11	7058266	7059698
chr11	7073351	7073893
chr11	7349832	7351240
chr11	7385216	7386479
chr11	7404437	7406107
chr11	7519329	7519989
chr11	8083629	8085880
chr11	8147219	8148233
chr11	8205126	8206206
chr11	8206208	8207388
chr11	8396629	8397206
chr11	8886625	8888113
chr11	8984416	8986328
chr11	9003790	9004513
chr11	9406341	9407794
chr11	9752183	9753086
chr11	10448220	10450637
chr11	12725089	12726748
chr11	13334610	13336244
chr11	13664388	13665772
chr11	13678512	13679853
chr11	14585299	14586219
chr11	14928437	14930534
chr11	16131962	16133005
chr11	16149884	16151515
chr11	16152783	16153912
chr11	16209265	16211362
chr11	16263571	16265311
chr11	16277934	16280859
chr11	16282793	16283438
chr11	17931895	17933443
chr11	18112830	18113404
chr11	18247890	18249348
chr11	18355185	18355819
chr11	18392474	18392976
chr11	18402317	18403592
chr11	18426705	18427268
chr11	18627843	18628397
chr11	18879828	18881623
chr11	19437006	19440424
chr11	19879261	19879850
chr11	20292467	20294271
chr11	20639497	20641971
chr11	21062749	21064068
chr11	21069327	21070618
chr11	21127351	21130071
chr11	21176866	21179152
chr11	21182195	21182808
chr11	21193170	21195114
chr11	21890359	21891223
chr11	21929829	21931718
chr11	22017021	22017501
chr11	22075808	22078126
chr11	22185674	22186294
chr11	22190698	22192537
chr11	22241006	22242835
chr11	22280741	22282745
chr11	22293180	22297034
chr11	22300992	22302846
chr11	22302878	22304683
chr11	22332215	22335032
chr11	22410799	22411297
chr11	22564921	22565798
chr11	22573574	22574762
chr11	22576915	22578354
chr11	22582667	22584724
chr11	22615044	22617433
chr11	22620401	22622345
chr11	22659055	22660581
chr11	22727882	22728890
chr11	22730078	22731567
chr11	23095744	23098148
chr11	23654024	23654990
chr11	23952413	23953200
chr11	24024695	24025884
chr11	24687480	24688178
chr11	24705195	24707159
chr11	24729521	24730172
chr11	24897986	24899097
chr11	25733826	25734820
chr11	25787492	25788466
chr11	25808167	25810042
chr11	25832925	25834004
chr11	25880858	25881734
chr11	25884431	25885420
chr11	25912794	25915187
chr11	25925571	25926467
chr11	26018083	26019099
chr11	26073986	26079060
chr11	27142124	27143177
chr11	27507642	27508330
chr11	28143179	28144060
chr11	28205165	28206397
chr11	28207357	28208533
chr11	28235082	28236109
chr11	28237766	28238691
chr11	28242548	28244209
chr11	28261584	28262816
chr11	28273428	28274984
chr11	28297703	28298483
chr11	28298952	28300332
chr11	28301868	28304155
chr11	28314682	28315448
chr11	28451359	28452856
chr11	28453451	28455935
chr11	28527418	28528049
chr11	28625858	28626872
chr11	28672962	28673526
chr11	28795775	28796769
chr11	29052022	29052549
chr11	29329316	29330100
chr11	30413869	30418157
chr11	30503479	30504450
chr11	30546250	30547156
chr11	30596115	30596999
chr11	30836890	30837894
chr11	30837920	30840577
chr11	31260404	31260990
chr11	31413478	31415324
chr11	32363951	32364948
chr11	32368322	32369268
chr11	33181530	33183296
chr11	33436542	33437320
chr11	33465861	33466328
chr11	33468969	33472139
chr11	34568616	34569788
chr11	34978243	34980654
chr11	34982741	34983380
chr11	35097119	35098224
chr11	35117124	35119922
chr11	35127629	35128192
chr11	35128560	35130088
chr11	35133668	35134271
chr11	35147847	35148314
chr11	35836821	35837415
chr11	36478744	36480166
chr11	36685644	36686985
chr11	37099584	37101403
chr11	37643018	37643980
chr11	38834841	38835597
chr11	38933870	38935389
chr11	38960633	38961592
chr11	38969501	38970257
chr11	39430410	39432062
chr11	39682535	39683835
chr11	40175950	40176718
chr11	40881052	40881752
chr11	41238379	41239606
chr11	41729658	41730096
chr11	41742053	41743418
chr11	41764764	41765533
chr11	41787068	41788363
chr11	42575893	42576910
chr11	43112617	43115040
chr11	43546184	43548677
chr11	43969389	43970461
chr12	235674	236324
chr12	2002838	2004563
chr12	2014396	2015872
chr12	2019281	2022313
chr12	2023446	2024536
chr12	2071548	2072638
chr12	2391805	2392964
chr12	3160044	3160848
chr12	4240586	4242061
chr12	4897980	4898627
chr12	6783367	6783960
chr12	6820022	6821287
chr12	6823383	6824424
chr12	6869350	6871056
chr12	6871605	6872974
chr12	6892770	6894310
chr12	6963402	6965101
chr12	9083048	9083707
chr12	9226562	9227146
chr12	9232849	9234846
chr12	9319817	9321163
chr12	10243364	10243891
chr12	11144937	11147466
chr12	11184167	11184735
chr12	11221431	11221904
chr12	11221941	11222430
chr12	11310062	11310655
chr12	11633171	11634286
chr12	11665132	11665838
chr12	13081604	13084591
chr12	16049887	16050946
chr12	16150737	16152571
chr12	16775877	16777116
chr12	16810655	16812227
chr12	17649144	17650366
chr12	17866325	17867486
chr12	18112163	18114431
chr12	18216768	18217716
chr12	18554278	18554839
chr12	18601211	18604175
chr12	19295894	19297340
chr12	19363198	19363863
chr12	20376445	20376959
chr12	20392099	20392839
chr12	20432503	20433380
chr12	20475313	20476228
chr12	20484789	20485471
chr12	20780204	20783149
chr12	20785859	20788168
chr12	20811975	20812930
chr12	20927210	20928876
chr12	20936210	20937161
chr12	21140970	21141685
chr12	21178604	21180170
chr12	21322281	21322971
chr12	21362188	21362908
chr12	21831624	21832266
chr12	22046310	22046833
chr12	22236569	22237092
chr12	22318165	22318749
chr12	22347320	22348475
chr12	22424467	22426195
chr12	22682166	22684525
chr12	23163306	23163838
chr12	23172214	23173030
chr12	23611236	23612096
chr12	23713043	23713580
chr12	23733879	23736583
chr12	23892208	23893352
chr12	23916770	23918766
chr12	24140711	24141722
chr12	24483921	24484494
chr12	25368383	25370778
chr12	25630606	25631098
chr12	26231387	26233809
chr12	26235454	26236094
chr12	26240323	26241399
chr12	26263838	26265544
chr12	26811901	26813212
chr12	26825504	26826783
chr12	26906080	26906530
chr12	27650130	27651157
chr12	27682380	27683128
chr12	27869696	27870340
chr12	28227753	28229604
chr12	28691730	28692587
chr12	28843860	28844649
chr12	29318336	29319721
chr12	29864269	29868006
chr12	29894725	29896101
chr12	29911649	29915143
chr12	29949343	29950448
chr12	29950570	29954393
chr12	29958055	29959810
chr12	29962261	29963678
chr12	29964499	29969231
chr12	30032742	30033359
chr12	30422972	30423713
chr12	31768822	31769403
chr12	31851357	31857117
chr12	32006584	32007868
chr12	32586397	32587086
chr12	33693396	33694817
chr12	33697773	33698983
chr12	33701312	33702219
chr12	33775501	33776572
chr12	33891052	33892255
chr12	33895671	33897128
chr12	33933082	33935292
chr12	34193549	34194342
chr12	34218853	34220195
chr12	34558971	34559988
chr12	34580752	34583061
chr12	34942939	34943708
chr12	34949152	34950422
chr12	35227331	35228757
chr12	35263640	35264624
chr12	35266481	35268406
chr12	35993744	35995120
chr12	36160502	36161458
chr12	36162198	36162795
chr12	36168069	36168696
chr12	36215429	36215987
chr12	36392913	36394429
chr12	36397108	36400482
chr12	36409205	36410266
chr12	36411845	36414294
chr12	36610796	36612173
chr12	36616234	36616867
chr12	36629961	36631497
chr12	36632229	36633836
chr12	36652451	36653353
chr12	36664081	36665634
chr12	36691960	36693353
chr12	37901773	37902614
chr12	37947958	37949134
chr12	37976161	37977890
chr12	38028882	38030028
chr12	38478030	38478544
chr12	39665628	39666869
chr12	39670482	39671043
chr12	41288490	41289154
chr12	41323636	41327263
chr12	41365633	41368328
chr12	41377280	41378263
chr12	41713572	41713993
chr12	41714779	41716106
chr12	42256359	42257337
chr12	42278633	42279417
chr12	43021320	43022281
chr12	43025810	43027810
chr12	43212119	43213589
chr12	43242979	43244216
chr12	43319892	43321947
chr12	43650800	43651836
chr12	43802204	43802726
chr12	45877643	45878169
chr12	46417395	46417939
chr13	1162546	1166139
chr13	1540869	1541885
chr13	1545025	1546679
chr13	1557782	1559905
chr13	1635500	1636392
chr13	1649324	1649855
chr13	1866278	1867667
chr13	1905186	1906403
chr13	2193624	2194483
chr13	2213673	2214226
chr13	3118866	3120161
chr13	3255171	3256516
chr13	3266732	3267382
chr13	3267699	3268920
chr13	3278329	3278736
chr13	3715384	3716206
chr13	4606774	4610445
chr13	4625632	4626233
chr13	5110473	5112348
chr13	5116463	5117129
chr13	5118143	5119154
chr13	5707326	5707830
chr13	5721741	5722627
chr13	5733443	5734012
chr13	5762914	5763342
chr13	5770994	5774520
chr13	5811874	5821681
chr13	5821751	5823598
chr13	5824638	5826302
chr13	5835343	5847190
chr13	5848679	5850048
chr13	5851004	5853199
chr13	5853489	5857217
chr13	5860203	5860809
chr13	5860986	5868990
chr13	5869815	5871504
chr13	5877638	5878592
chr13	5900635	5902059
chr13	5912492	5913200
chr13	5914640	5916411
chr13	5922083	5923631
chr13	5931170	5932515
chr13	5940727	5941434
chr13	6068330	6069639
chr13	6078663	6080650
chr13	6098190	6099119
chr13	6426736	6427505
chr13	6651699	6652991
chr13	6924792	6925690
chr13	7045595	7046150
chr13	7242179	7243319
chr13	7267404	7267944
chr13	7770433	7771021
chr13	7795884	7797206
chr13	7824923	7825525
chr13	7830881	7832596
chr13	7838876	7840655
chr13	8042380	8043438
chr13	8114981	8115728
chr13	9378018	9379510
chr13	9590303	9591114
chr13	9994047	9995732
chr13	10085631	10087169
chr13	10135240	10137655
chr13	10475538	10476301
chr13	10549405	10550245
chr13	10631296	10632932
chr13	11302531	11303703
chr13	11337610	11339153
chr13	11368661	11370184
chr13	11945048	11946733
chr13	12198390	12199019
chr13	13452213	13453015
chr13	13459001	13459974
chr13	16371277	16372285
chr13	16633657	16634703
chr13	17612379	17614577
chr13	17709318	17709953
chr13	18115506	18117675
chr13	18122675	18123467
chr13	18350837	18352168
chr13	18633631	18634658
chr13	18646584	18647956
chr13	18648694	18650563
chr13	18661920	18663016
chr13	18811927	18813228
chr13	18821218	18823076
chr13	18826767	18827480
chr13	18848711	18850260
chr13	18869178	18870071
chr13	18877430	18878937
chr13	18879082	18880084
chr13	18881403	18882336
chr13	18883661	18885004
chr13	18889473	18893498
chr13	18893637	18894162
chr13	18895815	18896444
chr13	18949926	18952042
chr13	18952359	18953312
chr13	18970968	18973166
chr13	19000130	19000569
chr13	19006863	19008700
chr13	19010729	19011362
chr13	19017301	19023351
chr13	19024231	19026407
chr13	19031184	19033377
chr13	19059964	19062791
chr13	19064629	19065887
chr13	19074663	19076746
chr13	19087422	19087964
chr13	19181151	19182380
chr13	19245053	19246122
chr13	19305266	19307304
chr13	19470768	19472924
chr13	19508003	19508543
chr13	19761335	19762039
chr13	19953070	19954385
chr13	20037572	20038254
chr13	20072501	20073252
chr13	20073939	20075415
chr13	20433449	20434460
chr13	20440708	20441968
chr13	20453308	20456066
chr13	20471989	20473553
chr13	20480724	20481525
chr13	21966065	21967177
chr13	21968331	21969038
chr13	22038663	22042370
chr13	22470503	22473164
chr13	22639801	22641254
chr13	22669507	22670862
chr13	22679237	22682247
chr13	22722601	22723919
chr13	22727873	22729249
chr13	23589770	23590450
chr13	23969741	23970981
chr13	24913249	24914344
chr13	25404252	25409062
chr13	25852228	25853084
chr13	25856468	25857862
chr13	25861636	25862929
chr13	26027030	26029288
chr13	26031362	26033001
chr13	26482103	26482821
chr13	26556021	26556442
chr13	26647102	26648238
chr13	26650105	26651652
chr13	26690554	26691680
chr13	26699022	26701160
chr13	26789140	26792075
chr13	26950269	26951600
chr13	27080158	27080674
chr13	27133416	27134048
chr13	27145254	27146030
chr13	27753918	27756693
chr13	28005862	28007718
chr13	28597118	28598042
chr13	28630883	28636789
chr13	28638115	28639725
chr13	28649832	28650957
chr13	28651936	28653241
chr13	28654996	28657188
chr13	28757974	28758765
chr13	28855294	28855896
chr13	29009257	29010972
chr13	29189510	29190758
chr13	29210367	29212956
chr13	29278701	29281773
chr13	29338436	29340158
chr13	29481525	29482327
chr13	29482701	29484601
chr13	29497917	29498729
chr13	29756182	29757547
chr13	29806106	29809274
chr13	29842376	29843010
chr13	29871613	29873431
chr13	29876494	29877507
chr13	29904233	29905624
chr13	29956874	29958904
chr13	29960510	29962214
chr13	29981532	29983552
chr13	30025646	30028846
chr13	30064148	30064706
chr13	30308767	30310519
chr13	30320690	30321927
chr13	30391053	30393318
chr13	30437123	30437579
chr13	30753696	30755717
chr13	30756182	30757581
chr13	30768177	30768986
chr13	31478668	31479724
chr13	31767104	31768305
chr13	31827949	31828772
chr13	31836999	31837807
chr13	32411496	32413327
chr13	32992788	32994430
chr13	33111429	33112236
chr13	33375780	33376276
chr13	33519665	33521735
chr13	33648246	33649785
chr13	35066483	35067539
chr13	35079325	35079760
chr13	35120214	35121349
chr13	35145469	35146370
chr13	35159065	35160530
chr13	35206973	35208042
chr13	35231920	35232869
chr13	35237903	35238435
chr13	35241171	35242533
chr13	35244331	35244906
chr13	35258061	35260288
chr13	35261504	35264227
chr13	35280065	35281313
chr13	35283127	35286812
chr13	35287693	35289144
chr13	35292121	35293506
chr13	35307746	35309202
chr13	35309796	35311574
chr13	35311614	35313258
chr13	35316623	35317767
chr13	35322039	35322788
chr13	35329836	35331475
chr13	35355375	35356817
chr13	35360103	35362883
chr13	35501070	35502275
chr13	35526150	35531629
chr13	35793994	35795123
chr13	36298717	36300214
chr13	36939673	36940241
chr13	37116054	37116637
chr13	37120997	37121722
chr13	37121782	37123148
chr13	37252368	37253969
chr13	37386911	37388003
chr13	37433555	37434069
chr13	37434818	37436057
chr13	38175689	38176225
chr13	38937170	38938810
chr13	39568135	39568727
chr13	39792154	39793208
chr13	39810602	39812514
chr13	39827026	39828492
chr13	39912154	39912927
chr13	42227894	42228618
chr13	42709303	42712010
chr13	44313515	44315113
chr13	45138855	45139964
chr13	45307349	45308434
chr13	45312266	45314097
chr13	45319491	45320947
chr13	45550983	45552594
chr13	45573447	45574142
chr13	45644631	45645255
chr13	46629218	46629862
chr13	46663913	46665874
chr13	46675986	46677330
chr13	46837869	46838882
chr13	47663912	47665022
chr13	48321851	48323424
chr13	49573602	49573973
chr13	50408242	50409804
chr13	50680062	50680724
chr14	255768	256310
chr14	1509627	1510007
chr14	1517479	1519198
chr14	1861403	1862142
chr14	2062829	2063509
chr14	3508790	3510779
chr14	5746423	5746978
chr14	5829551	5832130
chr14	6213135	6214077
chr14	6233372	6234828
chr14	6244842	6245480
chr14	6320099	6320788
chr14	6321600	6324013
chr14	6372383	6373403
chr14	6381552	6382321
chr14	7187860	7189017
chr14	7847488	7849738
chr14	7909592	7910526
chr14	8135898	8136813
chr14	8234841	8235425
chr14	8313923	8314659
chr14	8316114	8318656
chr14	8321431	8322823
chr14	8400880	8402125
chr14	8421628	8423343
chr14	8439342	8439840
chr14	9112491	9112996
chr14	9664645	9666258
chr14	11119108	11123332
chr14	11596285	11597250
chr14	11733306	11734447
chr14	12549408	12550355
chr14	13290125	13291188
chr14	13824870	13826461
chr14	13826652	13827964
chr14	14748859	14749926
chr14	15950243	15950808
chr14	16076812	16077903
chr14	16098681	16099486
chr14	16106021	16108778
chr14	16110121	16111174
chr14	16111259	16113550
chr14	16348356	16349643
chr14	16520035	16520851
chr14	17088593	17090169
chr14	17387780	17390138
chr14	18458837	18460230
chr14	19196753	19197230
chr14	19992062	19993081
chr14	20270677	20271470
chr14	20277943	20278525
chr14	20286472	20287225
chr14	20455563	20456692
chr14	20490494	20491794
chr14	20884133	20884728
chr14	20884898	20885485
chr14	22165874	22166448
chr14	22354613	22355569
chr14	22445241	22446787
chr14	22520546	22520980
chr14	23902055	23903565
chr14	24822207	24822749
chr14	24852311	24852791
chr14	25010219	25011330
chr14	25046933	25048921
chr14	25169650	25170176
chr14	25562057	25563788
chr14	25621217	25621599
chr14	25699587	25700491
chr14	25851446	25852085
chr14	25874380	25875166
chr14	26027696	26030290
chr14	26055740	26057615
chr14	26058206	26059462
chr14	26062697	26063877
chr14	26079463	26080842
chr14	26101593	26103139
chr14	26114509	26118231
chr14	26128286	26129250
chr14	26900879	26904028
chr14	27008747	27010028
chr14	27675438	27676103
chr14	28194772	28196247
chr14	28381953	28384492
chr14	28386733	28387209
chr14	28391171	28393523
chr14	28426015	28427026
chr14	28482016	28484457
chr14	29388421	29389137
chr14	29398645	29400148
chr14	29409897	29410441
chr14	29418877	29421952
chr14	29424363	29427601
chr14	29428453	29429644
chr14	29430605	29431335
chr14	29654177	29657080
chr14	29754287	29755260
chr14	29897795	29898349
chr14	31414808	31415419
chr14	32067736	32069666
chr14	32112651	32113987
chr14	32375359	32376005
chr14	32489439	32489888
chr14	33380099	33382189
chr14	33382626	33386540
chr14	33813450	33814459
chr14	33826423	33828273
chr14	33831281	33831920
chr14	33887507	33889907
chr14	34006931	34007446
chr14	34013715	34015962
chr14	34017798	34018900
chr14	34127872	34129304
chr14	34138389	34138901
chr14	34156797	34158402
chr14	34161123	34163943
chr14	34207438	34208096
chr14	34213554	34215955
chr14	34222099	34225473
chr14	34227268	34229066
chr14	34234040	34234830
chr14	34237481	34238714
chr14	34248646	34250852
chr14	34254295	34255954
chr14	34257237	34264318
chr14	34265060	34266532
chr14	34628600	34629132
chr14	34629578	34630217
chr14	35098135	35098675
chr14	35749415	35749866
chr14	35927777	35928724
chr14	35993271	35994866
chr14	36005302	36006109
chr14	36007603	36010338
chr14	36011871	36012674
chr14	36530464	36532419
chr14	36533734	36535151
chr14	36584042	36585092
chr14	36587617	36589194
chr14	36846343	36847256
chr14	36880481	36882472
chr14	37085799	37087018
chr14	37235739	37238849
chr14	37240843	37243622
chr14	37487520	37488173
chr14	37703026	37703835
chr14	39210807	39212120
chr14	39216158	39217281
chr14	39279689	39280572
chr14	39540495	39541634
chr14	41126815	41127580
chr14	41163541	41164460
chr14	41200097	41201636
chr14	41203466	41204761
chr14	41213117	41214523
chr14	41215532	41216632
chr14	41221413	41222471
chr14	41274657	41275172
chr14	41413727	41414598
chr14	41415358	41418951
chr14	41434328	41435564
chr14	41469296	41471393
chr14	41472523	41473636
chr14	41475269	41476409
chr14	41661781	41662336
chr14	41755563	41756152
chr14	42484213	42486979
chr14	42488224	42490019
chr14	42491905	42493502
chr14	42509788	42510263
chr14	42531099	42532143
chr14	42626720	42627612
chr14	42639793	42641309
chr14	42739793	42745123
chr14	42745874	42747052
chr14	43033656	43036433
chr14	43799922	43801496
chr14	43834754	43836637
chr14	44197496	44198826
chr14	44237465	44238531
chr14	44324475	44325465
chr14	44482207	44483469
chr14	44533215	44534591
chr14	44587387	44588353
chr14	44589364	44590455
chr14	44593568	44595576
chr14	44818367	44819219
chr14	44856081	44856693
chr14	44870835	44872226
chr14	44889985	44892296
chr14	44905337	44906000
chr14	48430856	48431348
chr14	49843945	49844442
chr14	50423712	50424586
chr14	50565608	50568328
chr14	50743486	50744464
chr14	51011690	51012972
chr14	51372206	51374049
chr14	52706934	52708239
chr14	52716867	52717704
chr15	79570	81069
chr15	2668436	2668928
chr15	3274159	3275147
chr15	3580517	3581172
chr15	3901737	3902567
chr15	4843087	4843607
chr15	4867161	4870165
chr15	4887368	4889301
chr15	4917552	4918175
chr15	5126402	5128377
chr15	5299755	5302792
chr15	6236739	6237495
chr15	6876021	6877570
chr15	7290561	7291468
chr15	8285208	8288032
chr15	9748368	9751015
chr15	9753609	9754471
chr15	10289096	10289954
chr15	11981096	11982370
chr15	11998868	12001101
chr15	12010530	12012665
chr15	12563114	12563711
chr15	12741521	12742563
chr15	12745941	12746755
chr15	13306652	13307530
chr15	13307694	13308687
chr15	13310931	13311526
chr15	13371712	13372720
chr15	13804838	13806397
chr15	13810316	13811156
chr15	14050412	14052838
chr15	14146757	14147214
chr15	14363200	14364331
chr15	14676372	14677818
chr15	14688429	14692576
chr15	14897585	14899367
chr15	14910565	14911718
chr15	14952227	14953217
chr15	14959086	14960070
chr15	14960643	14969058
chr15	14970004	14971327
chr15	14972150	14973019
chr15	14987142	14987756
chr15	14995619	14996373
chr15	15003454	15004434
chr15	15224975	15227399
chr15	15421991	15422578
chr15	15563234	15564015
chr15	16083824	16084636
chr15	16230305	16231838
chr15	16350759	16351748
chr15	16500068	16500549
chr15	16528438	16529379
chr15	16657510	16658020
chr15	16924858	16925533
chr15	16949346	16950089
chr15	16991673	16992668
chr15	16998576	17000583
chr15	17011248	17013078
chr15	17013167	17014067
chr15	17015603	17017056
chr15	17017563	17018715
chr15	18469630	18470368
chr15	18851141	18852611
chr15	19380240	19381852
chr15	19601280	19602160
chr15	19755333	19756400
chr15	20460046	20460887
chr15	20483419	20484119
chr15	20609652	20613089
chr15	20616789	20617555
chr15	20644275	20645280
chr15	20680513	20681327
chr15	20688864	20690337
chr15	20852572	20853689
chr15	20891308	20892280
chr15	21521040	21521976
chr15	21557664	21558415
chr15	21572961	21574542
chr15	21594320	21595505
chr15	21602698	21603814
chr15	21612336	21613490
chr15	21628193	21629809
chr15	21638658	21639151
chr15	21642438	21643062
chr15	21661510	21662853
chr15	21675014	21675953
chr15	21833045	21834866
chr15	21938118	21938871
chr15	21972223	21974383
chr15	21978071	21978784
chr15	21982028	21982613
chr15	21986128	21986872
chr15	22142964	22144487
chr15	22610603	22613789
chr15	22619559	22621077
chr15	23032979	23034262
chr15	23222727	23223727
chr15	23874603	23875081
chr15	24575886	24576912
chr15	24812023	24813274
chr15	24847835	24848483
chr15	24862474	24864652
chr15	25019308	25019911
chr15	25335478	25337285
chr15	25338362	25339333
chr15	25519471	25520856
chr15	25521087	25522070
chr15	27186865	27190187
chr15	27558550	27559201
chr15	27656579	27657779
chr15	27731011	27731612
chr15	27732304	27733769
chr15	27739689	27741225
chr15	27762403	27763366
chr15	27905624	27911951
chr15	28160915	28162573
chr15	28182282	28184716
chr15	28186660	28187622
chr15	28316228	28317855
chr15	28330470	28331657
chr15	28349939	28351144
chr15	28812439	28814202
chr15	28814224	28815296
chr15	29166087	29167278
chr15	29276389	29277960
chr15	29286404	29287665
chr15	29336830	29340069
chr15	29775061	29776351
chr15	29914574	29916722
chr15	29923184	29924059
chr15	30144359	30147335
chr15	30206900	30208321
chr15	30209703	30212620
chr15	30215407	30217458
chr15	30222073	30222908
chr15	30234506	30236170
chr15	30648732	30649241
chr15	30674080	30675770
chr15	30955456	30956637
chr15	31020366	31021047
chr15	31022562	31025708
chr15	31030161	31030650
chr15	31036344	31041058
chr15	31042007	31043934
chr15	31045018	31045625
chr15	31046163	31047328
chr15	31155728	31156360
chr15	31175633	31176640
chr15	31183806	31185079
chr15	31190042	31190932
chr15	31258001	31258624
chr15	31275857	31276748
chr15	31311436	31312605
chr15	31667923	31669233
chr15	32368407	32370414
chr15	33064287	33064872
chr15	33067941	33069281
chr15	33492053	33492582
chr15	33519182	33520057
chr15	33585365	33586554
chr15	33672020	33672941
chr15	33803539	33804195
chr15	33805634	33806640
chr15	33809354	33810413
chr15	33823966	33825745
chr15	33831812	33832371
chr15	33832436	33833732
chr15	33834000	33834907
chr15	34334045	34334825
chr15	34599871	34601059
chr15	34675269	34676777
chr15	35037311	35039436
chr15	35406295	35406873
chr15	35762805	35763804
chr15	35951774	35952418
chr15	35979424	35980834
chr15	36216658	36217556
chr15	36490011	36491117
chr15	36496546	36496997
chr15	36732470	36733124
chr15	37154877	37156371
chr15	37223963	37224892
chr15	37411856	37412484
chr15	37414104	37414670
chr15	37574614	37578548
chr15	37587367	37588206
chr15	37728723	37729464
chr15	38748461	38750732
chr15	39012594	39013962
chr15	39018178	39018832
chr15	39217819	39218805
chr15	39235399	39237248
chr15	39278132	39278529
chr15	39285566	39286379
chr15	39291256	39296552
chr15	39676922	39678765
chr15	39739304	39740946
chr15	39743023	39744201
chr15	39796301	39797678
chr15	39825360	39827091
chr15	39864900	39865401
chr15	39929339	39930454
chr15	39931034	39932406
chr15	39944067	39944585
chr15	40023337	40024168
chr15	41010609	41011306
chr15	42165764	42167244
chr15	42326322	42327053
chr15	42725499	42728700
chr15	44935479	44936943
chr15	45145788	45146818
chr15	46769967	46770639
chr16	43583	45018
chr16	450107	451638
chr16	991673	992820
chr16	1293430	1294649
chr16	1306328	1307003
chr16	1349350	1349866
chr16	1814647	1815409
chr16	2161931	2162619
chr16	2638010	2638455
chr16	3093806	3095005
chr16	3379208	3380504
chr16	3380719	3381803
chr16	4059416	4059953
chr16	4158623	4160337
chr16	4731941	4732763
chr16	4896884	4898340
chr16	4912824	4914600
chr16	5160952	5162671
chr16	5205101	5205901
chr16	5905893	5907180
chr16	6382335	6383109
chr16	6384408	6386089
chr16	6400330	6405227
chr16	6412273	6412928
chr16	6417981	6419152
chr16	6452158	6452803
chr16	6453755	6455457
chr16	6459413	6460640
chr16	6469724	6471428
chr16	6473838	6475615
chr16	6483802	6486053
chr16	6488370	6489507
chr16	6492071	6493690
chr16	6496771	6497787
chr16	6689079	6690461
chr16	7209172	7211586
chr16	7225405	7226068
chr16	7485142	7486344
chr16	7740532	7741725
chr16	9069624	9070482
chr16	9089762	9090932
chr16	9095849	9096919
chr16	9099161	9101514
chr16	9106793	9108183
chr16	9135294	9136741
chr16	9594109	9595738
chr16	9791233	9791952
chr16	11995233	11996789
chr16	12018751	12020262
chr16	12049304	12051357
chr16	12106170	12107635
chr16	12339780	12341329
chr16	13874640	13876690
chr16	13879293	13879908
chr16	14215598	14216970
chr16	14301787	14302931
chr16	14317316	14317979
chr16	14569120	14570079
chr16	16243778	16244707
chr16	16257336	16258677
chr16	16259389	16260494
chr16	16267448	16268960
chr16	16289314	16291288
chr16	16295996	16298245
chr16	16312705	16313963
chr16	16389226	16389910
chr16	16930972	16931817
chr16	17132645	17134164
chr16	17167270	17168463
chr16	17194255	17195350
chr16	17205329	17206562
chr16	17240037	17240800
chr16	17248295	17249668
chr16	17251761	17253786
chr16	17256591	17262530
chr16	17506576	17507165
chr16	18705245	18705906
chr16	18729407	18729951
chr16	19056118	19057153
chr16	20118918	20121203
chr16	21748027	21749300
chr16	21808494	21811902
chr16	22472647	22473211
chr16	22510636	22511232
chr16	22594608	22596398
chr16	22597712	22599379
chr16	22599811	22600844
chr16	22603150	22603981
chr16	22631970	22632984
chr16	22636700	22638159
chr16	22641091	22641580
chr16	22648087	22650178
chr16	22671919	22672661
chr16	22689309	22690100
chr16	23652242	23653906
chr16	23744374	23744960
chr16	23797979	23798669
chr16	24093114	24094000
chr16	24882400	24883627
chr16	25159143	25160070
chr16	25224955	25225593
chr16	25337214	25338047
chr16	25566586	25567950
chr16	25654709	25655991
chr16	26083941	26084601
chr16	26147543	26149500
chr16	26526163	26528720
chr16	26529346	26530470
chr16	26690105	26690765
chr16	27466604	27470457
chr16	27500887	27501408
chr16	27604878	27605907
chr16	27796828	27797688
chr16	27869373	27871310
chr16	27875916	27877607
chr16	27962606	27964072
chr16	28979681	28981168
chr16	29311939	29312666
chr16	29435073	29436373
chr16	29443801	29444252
chr16	29750510	29751184
chr16	29874983	29875543
chr16	31043080	31044343
chr16	31201631	31202944
chr16	31330669	31332271
chr16	31551323	31553915
chr16	31561903	31563511
chr16	32007763	32009505
chr16	32238640	32239345
chr16	32497272	32498139
chr16	32574178	32580548
chr16	33583907	33584555
chr16	33725003	33726460
chr16	34804231	34805774
chr16	34995406	34995911
chr16	35799699	35801370
chr16	37070058	37072970
chr16	37222428	37222930
chr16	37241790	37242738
chr16	37277399	37277959
chr16	37433564	37434524
chr16	37472612	37473932
chr16	37492663	37493219
chr16	37776350	37777364
chr16	37836525	37838178
chr16	37842028	37843146
chr16	37849551	37850899
chr16	38024249	38025020
chr16	38198503	38199007
chr16	38217512	38218393
chr16	38235006	38236517
chr16	38262412	38264181
chr16	38310019	38311115
chr16	38338508	38339606
chr16	38350550	38351619
chr16	38497848	38498505
chr16	38500506	38501505
chr16	38560028	38561861
chr16	38923421	38925048
chr16	38992128	38993261
chr16	38998126	39000632
chr16	39000752	39002735
chr16	39005300	39006483
chr16	39012689	39013341
chr16	39017287	39018237
chr16	39018475	39019946
chr16	39489863	39490517
chr16	39597493	39599189
chr16	39625660	39626738
chr16	39631513	39633494
chr16	40068722	40070409
chr16	40378048	40379764
chr16	40393469	40394250
chr16	40625274	40627031
chr16	41034424	41035840
chr16	41218694	41220734
chr16	42854368	42856229
chr16	42856918	42858212
chr16	42860883	42862415
chr16	42864504	42865576
chr16	42869736	42871881
chr16	42872695	42873439
chr16	43039406	43040145
chr16	44020139	44021685
chr16	44161007	44161991
chr16	44781887	44782498
chr16	46193725	46194507
chr16	46265480	46266074
chr16	46626047	46627608
chr16	46940392	46941833
chr16	47683283	47684148
chr16	48444917	48446440
chr16	50200050	50200947
chr16	50763670	50764322
chr16	50884771	50885633
chr16	51120643	51121483
chr16	51777377	51777904
chr17	4673392	4674178
chr17	7189052	7189821
chr17	7287556	7289180
chr17	7290308	7290960
chr17	7942590	7943741
chr17	8037833	8038595
chr17	8326436	8328236
chr17	8504844	8505501
chr17	8519363	8520953
chr17	8836839	8838850
chr17	8843502	8844215
chr17	8864739	8865177
chr17	8877089	8877818
chr17	9027083	9027613
chr17	9883935	9884681
chr17	9886084	9886730
chr17	9894073	9895149
chr17	10072523	10073474
chr17	10623552	10625282
chr17	11898208	11899513
chr17	11913267	11915099
chr17	12089525	12090047
chr17	12460427	12462849
chr17	12487017	12488200
chr17	12533837	12534334
chr17	12551007	12552037
chr17	12755298	12756116
chr17	13237071	13237844
chr17	14180603	14182104
chr17	14184763	14186757
chr17	14204901	14205421
chr17	14318398	14319270
chr17	14379330	14381390
chr17	14381873	14384017
chr17	14402739	14403393
chr17	14406963	14410222
chr17	14422504	14423489
chr17	14489028	14489610
chr17	14594163	14595449
chr17	14610001	14611416
chr17	15301593	15303059
chr17	15371796	15372307
chr17	16213193	16213896
chr17	16910324	16911129
chr17	16915887	16916706
chr17	16919904	16920690
chr17	16928154	16928704
chr17	17187635	17188909
chr17	17298697	17299807
chr17	17308764	17310316
chr17	17427553	17428155
chr17	17662796	17663891
chr17	17773708	17774814
chr17	17833037	17833634
chr17	17894599	17904118
chr17	17904778	17906081
chr17	17975584	17976673
chr17	18213162	18213759
chr17	18214866	18216785
chr17	18230877	18231940
chr17	18264283	18266315
chr17	18267726	18268721
chr17	18344525	18345150
chr17	18352230	18354024
chr17	18354579	18356248
chr17	18360733	18361627
chr17	18363739	18367220
chr17	18383555	18385308
chr17	18589738	18591558
chr17	18592068	18593710
chr17	18597182	18597752
chr17	18844888	18845510
chr17	19014401	19016474
chr17	19260973	19261926
chr17	19283195	19287124
chr17	19320893	19323276
chr17	19326358	19327447
chr17	19383055	19384127
chr17	19408436	19409760
chr17	19420846	19422254
chr17	19704642	19705114
chr17	20141404	20142015
chr17	20170112	20171737
chr17	20694073	20694907
chr17	20739346	20741331
chr17	21104202	21106850
chr17	21214559	21215692
chr17	21750550	21751082
chr17	21825136	21825808
chr17	21896079	21897307
chr17	21898368	21900229
chr17	21915270	21916025
chr17	21994734	21995572
chr17	22003454	22005413
chr17	22020097	22022310
chr17	22052102	22053049
chr17	22054707	22056081
chr17	22065589	22066139
chr17	22103549	22104421
chr17	22205417	22205962
chr17	22748147	22748644
chr17	23266101	23267440
chr17	23666751	23670045
chr17	23847330	23848634
chr17	24121320	24123497
chr17	24138722	24139338
chr17	24140711	24142472
chr17	24142892	24143970
chr17	24146120	24147213
chr17	24158369	24159218
chr17	24437138	24438210
chr17	24440966	24441968
chr17	24706959	24707521
chr17	24752060	24757750
chr17	24854480	24854992
chr17	25081315	25083619
chr17	25094577	25095110
chr17	25249487	25250391
chr17	25280302	25280981
chr17	25359314	25361412
chr17	25362414	25363065
chr17	25705348	25705926
chr17	25718364	25718903
chr17	25722220	25722841
chr17	26427888	26430988
chr17	26433110	26434227
chr17	26440485	26441221
chr17	26500652	26501146
chr17	26534648	26535512
chr17	26539357	26540560
chr17	26696628	26700678
chr17	26705660	26706285
chr17	26958485	26959601
chr17	26999324	27000170
chr17	27083036	27084233
chr17	27468912	27470578
chr17	27472509	27473520
chr17	27479596	27480106
chr17	27482240	27483803
chr17	27485176	27486904
chr17	27518764	27519598
chr17	27529261	27532248
chr17	27532277	27533482
chr17	27545496	27546265
chr17	27857123	27860189
chr17	28181163	28181875
chr17	28266865	28270342
chr17	28567835	28568379
chr17	28693221	28694073
chr17	28744813	28745603
chr17	29091241	29092839
chr17	29431285	29432467
chr17	30079491	30080010
chr17	30703506	30704979
chr17	30809742	30810466
chr17	30812895	30814255
chr17	30814323	30815824
[truncated: 3,495 more rows]

## Sheet: Table_S4
Zv8_NA1010	8256	9395
Zv8_NA10265	839	3667
Zv8_NA10582	1516	2092			File	Differentially H3K27 acetylated regions
Zv8_NA107	263	797			Stages	80% epiboly VS 24hpf
Zv8_NA10716	12506	13074			cut-off (q value)	0.05
Zv8_NA10729	1468	2616			cut-off (fold difference in tag number)	4
Zv8_NA1083	5087	6314
Zv8_NA110	15848	16781
Zv8_NA110	21653	22137
Zv8_NA11048	27413	28817
Zv8_NA111	79259	80201
Zv8_NA1134	9811	10496
Zv8_NA1134	39980	41580
Zv8_NA11417	38895	41210
Zv8_NA11417	190686	191321
Zv8_NA1251	24224	25021
Zv8_NA127	94591	95544
Zv8_NA1334	1840	2420
Zv8_NA1334	10704	11569
Zv8_NA1363	6150	6533
Zv8_NA1664	52878	53956
Zv8_NA1664	55682	57697
Zv8_NA1664	62666	63390
Zv8_NA1691	68927	69918
Zv8_NA1980	15007	16326
Zv8_NA1981	31960	32784
Zv8_NA2003	31821	32176
Zv8_NA2004	1065	1539
Zv8_NA2010	3570	4156
Zv8_NA2017	83210	84341
Zv8_NA2020	45940	46545
Zv8_NA2047	4188	4799
Zv8_NA2047	11673	12248
Zv8_NA2074	1429	2359
Zv8_NA2081	33105	34224
Zv8_NA2081	35192	35806
Zv8_NA2081	67049	67812
Zv8_NA2081	82419	83719
Zv8_NA2081	89225	90695
Zv8_NA2081	92510	93258
Zv8_NA2105	89341	90689
Zv8_NA2106	16279	17477
Zv8_NA2110	30725	31148
Zv8_NA2110	80402	80865
Zv8_NA2120	37072	38084
Zv8_NA2248	24811	25861
Zv8_NA2254	8875	9493
Zv8_NA2254	32219	33425
Zv8_NA2271	62977	63422
Zv8_NA2283	26712	28027
Zv8_NA2308	19215	21050
Zv8_NA2308	37886	38983
Zv8_NA2321	35546	35946
Zv8_NA2339	26322	26932
Zv8_NA2341	24547	24963
Zv8_NA2341	25173	25714
Zv8_NA2342	23584	25267
Zv8_NA2365	55983	56497
Zv8_NA2477	64402	65269
Zv8_NA2485	7695	8104
Zv8_NA2514	4703	5899
Zv8_NA2594	89329	89808
Zv8_NA2594	102762	104783
Zv8_NA2597	1514	2272
Zv8_NA2599	559	1790
Zv8_NA2623	82028	83743
Zv8_NA2727	49	1421
Zv8_NA2732	82522	82754
Zv8_NA2733	123403	123960
Zv8_NA2750	3399	4318
Zv8_NA2760	6024	7125
Zv8_NA2777	8080	8637
Zv8_NA2859	79612	80427
Zv8_NA2859	80690	81717
Zv8_NA2859	129379	129603
Zv8_NA2859	130102	132066
Zv8_NA2903	25425	26614
Zv8_NA2930	78685	79925
Zv8_NA2947	16840	17737
Zv8_NA2947	39181	39971
Zv8_NA2947	42395	43210
Zv8_NA2952	26119	26822
Zv8_NA2952	39344	40134
Zv8_NA2976	5541	7417
Zv8_NA2976	11011	12062
Zv8_NA2976	12597	14979
Zv8_NA2976	15224	18686
Zv8_NA3058	1035	1269
Zv8_NA3058	3681	4103
Zv8_NA3065	33960	34959
Zv8_NA3066	22221	22688
Zv8_NA3066	52970	53750
Zv8_NA3068	10320	10679
Zv8_NA3087	7800	8528
Zv8_NA3092	9204	9826
Zv8_NA3098	21316	22490
Zv8_NA3111	4027	4534
Zv8_NA3176	97480	98679
Zv8_NA3215	14522	14956
Zv8_NA3215	15572	18042
Zv8_NA3223	41329	42704
Zv8_NA3249	24450	25194
Zv8_NA326	264	702
Zv8_NA3276	60923	61489
Zv8_NA3343	39719	40597
Zv8_NA3343	76313	77252
Zv8_NA3343	79607	80365
Zv8_NA3349	73065	74526
Zv8_NA3358	287128	288060
Zv8_NA3466	69107	69891
Zv8_NA3471	61403	61979
Zv8_NA3500	25677	26355
Zv8_NA3528	4276	4926
Zv8_NA3541	3882	4348
Zv8_NA3541	4916	6067
Zv8_NA3541	10873	11269
Zv8_NA3604	90997	92747
Zv8_NA3604	93809	94561
Zv8_NA3609	66870	67288
Zv8_NA3610	68401	71064
Zv8_NA3637	80115	81228
Zv8_NA3662	20591	21244
Zv8_NA3682	101854	102706
Zv8_NA3682	103460	103787
Zv8_NA3695	35955	36332
Zv8_NA3704	66298	66689
Zv8_NA3709	37900	38763
Zv8_NA3748	65777	66330
Zv8_NA3748	323007	323747
Zv8_NA3750	8569	9184
Zv8_NA3751	12584	14575
Zv8_NA3751	18683	19086
Zv8_NA3779	14371	15360
Zv8_NA3782	70749	71793
Zv8_NA3850	43462	44025
Zv8_NA3864	25643	26315
Zv8_NA3866	10123	10856
Zv8_NA3883	8775	10076
Zv8_NA3883	80010	82573
Zv8_NA3883	88896	89460
Zv8_NA3883	104821	107260
Zv8_NA3883	108402	109580
Zv8_NA3899	87109	87475
Zv8_NA3921	34686	35838
Zv8_NA3931	60605	60979
Zv8_NA4006	48527	50564
Zv8_NA4102	40473	40941
Zv8_NA4129	56739	57583
Zv8_NA4181	77556	79495
Zv8_NA4212	10842	11786
Zv8_NA4212	81695	83616
Zv8_NA4213	166353	167122
Zv8_NA4272	13412	15514
Zv8_NA4286	11145	11845
Zv8_NA4286	18114	18934
Zv8_NA4385	7305	9326
Zv8_NA4392	52279	53745
Zv8_NA4408	71476	72448
Zv8_NA4460	24208	25121
Zv8_NA4489	29253	30439
Zv8_NA4490	39835	42138
Zv8_NA4501	13353	14629
Zv8_NA4532	58077	59171
Zv8_NA4581	11148	11708
Zv8_NA4607	110005	110599
Zv8_NA4607	135278	136317
Zv8_NA4607	148337	149754
Zv8_NA4659	50348	51371
Zv8_NA4666	53789	54648
Zv8_NA4666	63177	65057
Zv8_NA4666	99275	100627
Zv8_NA4692	3667	4912
Zv8_NA4716	8637	9353
Zv8_NA4798	55461	55914
Zv8_NA4845	86896	87773
Zv8_NA4900	26043	26556
Zv8_NA4918	112571	113464
Zv8_NA4986	76884	78281
Zv8_NA5034	37456	38691
Zv8_NA5034	39155	39779
Zv8_NA5043	66056	67221
Zv8_NA513	113760	115204
Zv8_NA521	13474	14068
Zv8_NA5222	64	912
Zv8_NA5222	28003	28603
Zv8_NA5263	31537	32011
Zv8_NA5310	39632	41279
Zv8_NA5536	63424	64849
Zv8_NA5536	66068	66877
Zv8_NA5536	73578	74782
Zv8_NA5585	46011	46528
Zv8_NA5585	94874	95388
Zv8_NA5599	16610	17055
Zv8_NA5605	25513	26170
Zv8_NA5671	1360	2101
Zv8_NA584	4459	5161
Zv8_NA5982	3463	7503
Zv8_NA5994	7705	8069
Zv8_NA6036	396739	398656
Zv8_NA6072	50752	51614
Zv8_NA6076	25254	25965
Zv8_NA6078	5573	6298
Zv8_NA6092	8877	10418
Zv8_NA6103	10039	11161
Zv8_NA6257	13434	14100
Zv8_NA6356	97344	98811
Zv8_NA654	775	1387
Zv8_NA658	1079	3453
Zv8_NA6689	719	3236
Zv8_NA674	4681	5658
Zv8_NA6999	3314	4217
Zv8_NA7044	186	506
Zv8_NA7055	2767	3309
Zv8_NA74	20462	21436
Zv8_NA7447	2792	3443
Zv8_NA7513	1	677
Zv8_NA7681	2828	4228
Zv8_NA7725	106	627
Zv8_NA7823	166806	167619
Zv8_NA8034	90074	91293
Zv8_NA8209	109349	110129
Zv8_NA8209	114385	114981
Zv8_NA839	45	1100
Zv8_NA8417	1041	1505
Zv8_NA8543	1	1473
Zv8_NA8587	1	1692
Zv8_NA8666	14343	16629
Zv8_NA8749	592	1501
Zv8_NA8830	130648	132265
Zv8_NA885	4046	4590
Zv8_NA8864	2702	3440
Zv8_NA9002	59511	60682
Zv8_NA9002	114405	115098
Zv8_NA9002	115588	118674
Zv8_NA9002	124139	124676
Zv8_NA9076	18377	19140
Zv8_NA9128	22823	23562
Zv8_NA9293	1	774
Zv8_NA9308	54411	56985
Zv8_NA9477	1135	1864
Zv8_NA9495	1174	2411
Zv8_NA9698	1551	2351
Zv8_NA9840	1779	2079
Zv8_NA993	1	426
Zv8_scaffold2951	37133	37584
Zv8_scaffold2958	42213	43039
Zv8_scaffold2960	38592	40865
Zv8_scaffold2960	57709	59154
Zv8_scaffold2960	59991	62264
Zv8_scaffold2972	113022	113403
Zv8_scaffold2974	41873	42840
Zv8_scaffold2974	45971	46835
Zv8_scaffold2975	105225	106122
Zv8_scaffold2977	32739	35008
Zv8_scaffold2979	80375	81078
Zv8_scaffold2989	34438	36394
Zv8_scaffold2996	51515	52239
Zv8_scaffold3017	12726	13781
Zv8_scaffold3020	153552	155911
Zv8_scaffold3020	159339	160370
Zv8_scaffold3022	210727	211443
Zv8_scaffold3025	42385	44376
Zv8_scaffold3025	245592	245958
Zv8_scaffold3025	549473	550496
Zv8_scaffold3025	582578	583729
Zv8_scaffold3025	597108	601666
Zv8_scaffold3025	604204	605507
Zv8_scaffold3025	605748	607035
Zv8_scaffold3025	617583	619762
Zv8_scaffold3025	621369	622279
Zv8_scaffold3025	624528	626125
Zv8_scaffold3025	635722	638198
Zv8_scaffold3026	21691	23075
Zv8_scaffold3026	24791	25246
Zv8_scaffold3026	72497	73892
Zv8_scaffold3026	81726	82365
Zv8_scaffold3026	93933	95241
Zv8_scaffold3026	102595	103652
Zv8_scaffold3026	107969	109075
Zv8_scaffold3026	158429	159131
Zv8_scaffold3027	219637	221321
Zv8_scaffold3028	17928	19271
Zv8_scaffold3029	198223	199491
Zv8_scaffold3029	299559	301276
Zv8_scaffold3032	16797	17598
Zv8_scaffold3041	150425	151483
Zv8_scaffold3041	160344	160954
Zv8_scaffold3041	166800	168498
Zv8_scaffold3041	308256	308795
Zv8_scaffold3041	330631	331655
Zv8_scaffold3041	338398	339033
Zv8_scaffold3041	349557	350755
Zv8_scaffold3041	393260	393721
Zv8_scaffold3041	398406	400174
Zv8_scaffold3045	88109	90427
Zv8_scaffold3060	196539	197053
Zv8_scaffold3061	195539	196585
Zv8_scaffold3066	207905	208849
Zv8_scaffold3066	224735	225277
Zv8_scaffold3082	68230	69431
Zv8_scaffold3086	35277	35677
Zv8_scaffold3087	81037	81647
Zv8_scaffold3087	205973	207071
Zv8_scaffold3088	134941	135331
Zv8_scaffold3091	183541	184389
Zv8_scaffold3091	250845	253985
Zv8_scaffold3094	49233	50561
Zv8_scaffold3094	84083	85046
Zv8_scaffold3103	62812	63355
Zv8_scaffold3103	182408	182690
Zv8_scaffold3103	211742	212406
Zv8_scaffold3103	237162	237678
Zv8_scaffold3106	202096	203740
Zv8_scaffold3112	140699	142240
Zv8_scaffold3121	66811	67976
Zv8_scaffold3121	71997	73406
Zv8_scaffold3121	145978	146505
Zv8_scaffold3121	158055	159730
Zv8_scaffold3121	196758	197744
Zv8_scaffold3123	159564	160216
Zv8_scaffold3123	350348	351615
Zv8_scaffold3123	357446	358857
Zv8_scaffold3123	362011	363180
Zv8_scaffold3127	29035	29576
chr1	183448	184285
chr1	941648	942347
chr1	950701	951221
chr1	2425004	2426556
chr1	2431042	2432409
chr1	2448021	2449145
chr1	3787644	3788266
chr1	3881979	3882512
chr1	4735825	4737119
chr1	4841508	4843623
chr1	4907069	4908233
chr1	5531262	5531817
chr1	6482246	6483077
chr1	7697095	7698130
chr1	7751488	7753156
chr1	7760767	7762101
chr1	7901470	7904912
chr1	7906981	7908311
chr1	9703943	9705800
chr1	10222958	10223860
chr1	10642055	10642898
chr1	10871040	10872155
chr1	11144208	11145129
chr1	11220088	11220788
chr1	11233037	11234073
chr1	11698123	11698995
chr1	12574440	12575489
chr1	14345477	14346013
chr1	14378671	14380691
chr1	15012180	15013107
chr1	15157573	15158528
chr1	15273812	15274822
chr1	15374323	15375092
chr1	15460387	15461058
chr1	15585923	15586468
chr1	15786627	15787374
chr1	15794165	15795720
chr1	16159234	16159753
chr1	16255874	16256932
chr1	16505525	16506058
chr1	16711875	16712402
chr1	16721797	16722639
chr1	16726859	16728884
chr1	16896142	16897880
chr1	16900227	16900784
chr1	16983768	16986366
chr1	17094915	17095584
chr1	17729323	17730038
chr1	18101104	18101689
chr1	18416291	18416872
chr1	18417358	18417848
chr1	18823808	18825243
chr1	19033107	19034169
chr1	19086901	19092545
chr1	19093534	19095930
chr1	19111072	19113699
chr1	19143018	19143681
chr1	19382442	19384118
chr1	20355537	20357449
chr1	20366292	20366839
chr1	20374699	20376897
chr1	20720938	20722181
chr1	22407461	22409530
chr1	23253463	23255017
chr1	23573141	23578212
chr1	23582286	23583823
chr1	23586756	23589807
chr1	23590359	23593446
chr1	23594225	23599441
chr1	23599727	23601349
chr1	23601662	23603585
chr1	23760067	23761053
chr1	24285360	24286557
chr1	24398179	24399454
chr1	24580913	24581590
chr1	24595978	24599008
chr1	24965314	24966317
chr1	25069886	25071066
chr1	25255915	25257302
chr1	25275478	25278313
chr1	25297668	25298203
chr1	26042964	26044281
chr1	26422978	26423575
chr1	26716329	26716807
chr1	26877138	26877749
chr1	26877762	26878592
chr1	26903174	26904385
chr1	27166909	27167469
chr1	27620545	27621300
chr1	28800163	28803886
chr1	29389952	29393109
chr1	29413920	29414904
chr1	29438660	29441722
chr1	29443050	29448763
chr1	29522482	29522974
chr1	29703631	29704930
chr1	29718412	29719208
chr1	30461498	30462027
chr1	30775250	30775793
chr1	30868967	30870590
chr1	30908083	30909408
chr1	30910063	30911449
chr1	30923548	30924210
chr1	30988676	30989686
chr1	31104075	31105643
chr1	31375806	31376906
chr1	33684634	33685300
chr1	34534481	34535677
chr1	34740025	34740657
chr1	34870476	34871746
chr1	34875753	34876679
chr1	35365185	35366652
chr1	35371774	35372769
chr1	35372871	35373983
chr1	35374283	35375256
chr1	35523481	35524677
chr1	36465432	36466325
chr1	36466884	36468767
chr1	36613422	36614524
chr1	36707909	36708829
chr1	36913935	36914895
chr1	36943653	36944238
chr1	37013669	37014161
chr1	37094313	37095077
chr1	37120930	37122021
chr1	37135947	37136447
chr1	37151392	37152030
chr1	37167294	37168396
chr1	37180419	37182502
chr1	37182587	37183643
chr1	37191451	37193927
chr1	37194082	37194592
chr1	37249498	37250281
chr1	37262984	37263554
chr1	37342885	37343461
chr1	37357447	37358170
chr1	38279842	38280627
chr1	39144606	39145909
chr1	39189042	39189934
chr1	39198631	39200376
chr1	39206449	39207728
chr1	39435302	39436480
chr1	39612495	39613306
chr1	39645819	39649267
chr1	39663074	39665204
chr1	40046363	40047236
chr1	40113419	40115957
chr1	40204642	40206466
chr1	40467201	40467687
chr1	42134324	42134820
chr1	43028684	43030036
chr1	43300622	43301684
chr1	43594775	43596546
chr1	43745876	43747542
chr1	44226627	44227199
chr1	44276413	44276972
chr1	44297203	44297813
chr1	44578053	44580984
chr1	44734294	44734974
chr1	45620866	45622637
chr1	45844452	45848845
chr1	46082049	46084350
chr1	46187878	46188376
chr1	46192563	46193203
chr1	46193493	46194149
chr1	46248422	46249137
chr1	46302499	46303447
chr1	47567468	47568387
chr1	47572196	47572722
chr1	47591500	47592418
chr1	47646445	47647348
chr1	47782721	47783779
chr1	47786910	47787914
chr1	47991967	47992528
chr1	48061127	48061913
chr1	48073152	48074296
chr1	48078403	48078900
chr1	48097911	48098857
chr1	48761156	48763720
chr1	48765249	48767276
chr1	48771570	48772103
chr1	48787806	48788821
chr1	49280352	49281426
chr1	49327422	49329215
chr1	49336678	49338791
chr1	49350404	49352821
chr1	49353306	49355613
chr1	49788735	49789626
chr1	49794119	49796035
chr1	49825122	49826109
chr1	49982328	49982976
chr1	50618719	50620027
chr1	50836600	50837825
chr1	50852296	50853388
chr1	50853514	50854495
chr1	50862153	50864205
chr1	51283640	51284933
chr1	51298068	51299859
chr1	51616548	51617675
chr1	51819000	51820106
chr1	52213201	52213797
chr1	52547324	52547973
chr1	52610772	52611511
chr1	53657599	53658169
chr1	53862685	53863493
chr1	54158891	54160235
chr1	54265402	54268263
chr1	54344308	54345438
chr1	54533082	54533505
chr1	55881613	55882243
chr1	56289230	56290674
chr1	56297907	56299004
chr1	56300573	56301171
chr1	58831442	58832022
chr10	16165	16981
chr10	59902	60330
chr10	219291	219755
chr10	735352	735771
chr10	1288323	1290392
chr10	1297182	1299178
chr10	1398230	1398875
chr10	1417668	1418402
chr10	1969404	1970049
chr10	2027212	2029007
chr10	2361854	2362838
chr10	2669473	2669955
chr10	2721000	2722457
chr10	3017428	3018323
chr10	4167913	4168859
chr10	4574494	4575281
chr10	4823910	4824514
chr10	4893748	4895076
chr10	4904025	4904731
chr10	4920743	4921432
chr10	4998848	4999661
chr10	5120008	5120609
chr10	5711959	5713745
chr10	5725311	5726471
chr10	5733858	5734499
chr10	5736665	5737642
chr10	5750380	5751153
chr10	5965855	5967186
chr10	6103232	6104802
chr10	6274995	6275556
chr10	6717062	6717678
chr10	7527019	7528292
chr10	7551413	7553506
chr10	7652243	7653250
chr10	8098998	8099707
chr10	8104593	8105262
chr10	10125989	10126957
chr10	10771799	10773356
chr10	10830559	10831899
chr10	10981268	10981995
chr10	11107289	11107844
chr10	11424689	11426001
chr10	11427875	11428458
chr10	11657014	11658861
chr10	12331088	12331813
chr10	12333206	12336034
chr10	12340535	12341015
chr10	12792051	12793720
chr10	12802869	12803415
chr10	12929931	12930564
chr10	12957361	12959475
chr10	13022753	13025112
chr10	13046926	13047857
chr10	13449166	13449800
chr10	13459166	13459688
chr10	13460790	13462664
chr10	14172354	14173144
chr10	14173552	14174572
chr10	14189169	14190805
chr10	15737609	15738158
chr10	16515509	16516894
chr10	16517133	16520312
chr10	16526313	16527526
chr10	17073250	17074086
chr10	17318643	17322472
chr10	17616635	17617404
chr10	17632418	17633270
chr10	18205737	18209128
chr10	18211156	18211506
chr10	18239204	18240144
chr10	18395726	18397308
chr10	18553660	18554202
chr10	19083389	19084082
chr10	19127839	19128486
chr10	19181181	19182023
chr10	19300156	19301360
chr10	19481117	19482043
chr10	19831027	19832803
chr10	20080720	20081688
chr10	20615508	20616765
chr10	20621817	20623082
chr10	20762924	20763685
chr10	21003893	21004781
chr10	21044669	21045617
chr10	21087826	21088411
chr10	21093389	21094019
chr10	21096577	21097912
chr10	21102057	21102720
chr10	21309961	21314402
chr10	21441121	21444898
chr10	21447951	21448612
chr10	21449945	21452163
chr10	21492804	21495628
chr10	21506291	21507352
chr10	21741118	21741779
chr10	21744412	21745739
chr10	21788455	21789211
chr10	21807307	21807858
chr10	21824112	21825643
chr10	21868414	21868964
chr10	22429822	22431256
chr10	22549283	22550811
chr10	22786298	22787421
chr10	22788678	22789031
chr10	22837846	22839709
chr10	22882576	22886635
chr10	22989109	22990878
chr10	22991898	22992745
chr10	22994448	22995908
chr10	23078925	23079457
chr10	23089018	23089677
chr10	23251855	23252677
chr10	23351124	23352477
chr10	23648139	23649842
chr10	23667459	23668843
chr10	23716129	23716646
chr10	23906180	23908315
chr10	23908817	23910691
chr10	24759874	24762138
chr10	25089936	25091606
chr10	25122192	25124014
chr10	25157231	25158657
chr10	25246515	25247210
chr10	25819722	25821386
chr10	25828414	25830887
chr10	25870170	25870679
chr10	26143911	26145563
chr10	26201627	26202702
chr10	26203729	26204527
chr10	26217174	26218464
chr10	27904082	27906008
chr10	28033105	28034860
chr10	28035564	28036740
chr10	28385003	28385858
chr10	28395368	28396069
chr10	28634203	28635500
chr10	28731268	28732691
chr10	28825693	28826290
chr10	29055929	29056601
chr10	29179308	29180360
chr10	29181164	29182815
chr10	29534698	29536394
chr10	29536644	29538958
chr10	29550420	29551011
chr10	29554634	29557823
chr10	29598756	29599850
chr10	29691485	29692612
chr10	29885962	29886822
chr10	30045661	30047720
chr10	30049012	30050224
chr10	30058990	30060539
chr10	30102143	30103031
chr10	30207427	30208908
chr10	30250793	30251325
chr10	30348428	30348960
chr10	30379906	30380987
chr10	30394292	30395303
chr10	30457416	30458082
chr10	30459895	30460616
chr10	30481176	30481766
chr10	30499873	30501655
chr10	31024659	31025601
chr10	31457190	31458076
chr10	31461027	31462189
chr10	31464206	31465404
chr10	31517910	31518466
chr10	31524772	31526298
chr10	31534324	31535198
chr10	32121051	32124172
chr10	32412168	32413335
chr10	32453590	32454624
chr10	33270409	33270974
chr10	33420024	33420542
chr10	33472791	33473839
chr10	33666695	33667430
chr10	33667800	33668287
chr10	34595050	34595834
chr10	34615239	34616279
chr10	34619837	34621090
chr10	34852921	34853467
chr10	35099125	35100307
chr10	35429891	35432438
chr10	35477694	35479376
chr10	36095394	36096407
chr10	36097404	36099096
chr10	36472099	36472812
chr10	36569411	36570664
chr10	39058474	39059036
chr10	39121065	39121601
chr10	40349676	40351712
chr10	40355148	40357466
chr10	41280697	41281712
chr10	41671127	41672082
chr10	41811269	41812298
chr10	41813682	41815732
chr10	42569923	42571441
chr10	42583428	42584558
chr10	42689965	42690535
chr10	42876591	42877184
chr10	42877290	42878049
chr10	43170559	43171073
chr10	43292827	43294865
chr10	43373992	43374893
chr11	30984	32547
chr11	269116	270185
chr11	400296	400770
chr11	463521	464284
chr11	478181	478814
chr11	1688899	1690301
chr11	1791694	1792241
chr11	2488427	2488975
chr11	2861680	2862349
chr11	2891060	2892247
chr11	3279407	3280441
chr11	3507140	3508789
chr11	3617640	3620499
chr11	3621108	3622543
chr11	4709235	4709720
chr11	5126187	5126796
chr11	5143912	5144577
chr11	5146311	5146896
chr11	5471226	5472896
chr11	5716249	5716795
chr11	6241266	6242732
chr11	6386644	6387901
chr11	6571430	6573367
chr11	6677375	6678470
chr11	6827144	6828756
chr11	6853181	6854412
chr11	6895737	6896746
chr11	7285611	7288016
chr11	7288273	7290217
chr11	7292025	7293504
chr11	7294099	7295840
chr11	7300703	7304858
chr11	7368218	7368631
chr11	7404437	7406107
chr11	7424229	7425126
chr11	7519329	7519989
chr11	7676883	7678475
chr11	7760431	7762470
chr11	7772344	7774926
chr11	7829470	7830110
chr11	7830161	7831926
chr11	7832399	7833503
chr11	8117847	8118473
chr11	8312039	8313068
chr11	8901367	8902478
chr11	9003160	9003764
chr11	9078961	9079484
chr11	9079580	9080245
chr11	9194607	9195927
chr11	10229627	10231275
chr11	11285661	11287147
chr11	11890826	11891433
chr11	12135410	12136085
chr11	12531873	12532301
chr11	12533511	12534287
chr11	12535836	12536608
chr11	12547931	12550307
chr11	12564202	12565928
chr11	12835931	12837308
chr11	13247549	13248568
chr11	13638045	13639738
chr11	13664388	13665772
chr11	14342372	14343337
chr11	14928437	14930534
chr11	14940586	14941900
chr11	16137878	16138437
chr11	16138542	16139164
chr11	16193057	16193643
chr11	16266822	16268670
chr11	16295638	16297202
chr11	16315938	16316981
chr11	16326887	16327464
chr11	16329122	16330196
chr11	16352459	16353813
chr11	16374259	16375170
chr11	16389955	16391055
chr11	17517610	17518203
chr11	17687291	17687825
chr11	17967362	17971370
chr11	18357063	18361399
chr11	20650041	20651269
chr11	20670653	20671376
chr11	21107593	21108136
chr11	21666849	21668017
chr11	21669655	21670912
chr11	21824750	21825327
chr11	21918273	21919442
chr11	22017021	22017501
chr11	22107809	22108610
chr11	22141037	22142033
chr11	22190698	22192537
chr11	22228093	22229107
chr11	22276403	22277400
chr11	22286802	22287232
chr11	22290599	22292524
chr11	22293180	22297034
chr11	22297103	22298933
chr11	22300992	22302846
chr11	22302878	22304683
chr11	22315577	22318193
chr11	22319754	22320349
chr11	22322471	22322953
chr11	22346783	22347388
chr11	22404239	22405408
chr11	22407377	22407808
chr11	22410799	22411297
chr11	22620401	22622345
chr11	22626608	22629507
chr11	22654259	22654766
chr11	22740513	22741410
chr11	22807690	22808359
chr11	22985298	22985921
chr11	23046157	23047021
chr11	23769464	23772311
chr11	23800301	23801117
chr11	24368343	24369242
chr11	24474834	24475526
chr11	25139624	25140194
chr11	25188644	25189673
chr11	26116957	26118784
chr11	26469286	26469862
chr11	26469874	26470272
chr11	26473332	26474911
chr11	26478064	26478761
chr11	26480942	26482041
chr11	26571124	26571917
chr11	26603716	26604170
chr11	26676123	26677427
chr11	26839752	26840244
chr11	27375439	27376989
chr11	27379145	27381635
chr11	27514085	27514832
chr11	27658386	27659063
chr11	27814357	27814840
chr11	27935895	27936585
chr11	28130561	28132267
chr11	28148992	28149945
chr11	28160662	28162282
chr11	28212515	28212952
chr11	28298952	28300332
chr11	28328966	28329960
chr11	28625858	28626872
chr11	28788372	28790012
chr11	28795775	28796769
chr11	29242634	29243466
chr11	29351121	29351932
chr11	29399535	29401746
chr11	29695947	29696639
chr11	29716261	29718773
chr11	29723905	29725439
chr11	30298330	30300171
chr11	30310500	30312193
chr11	30347229	30348404
chr11	30408213	30409987
chr11	30454535	30455124
chr11	30868784	30869192
chr11	30875368	30876815
chr11	30939481	30939911
chr11	31599751	31602944
chr11	31608830	31609963
chr11	32088198	32089130
chr11	32418797	32419785
chr11	32453240	32454702
chr11	33358341	33358843
chr11	33429105	33430058
chr11	33943767	33945285
chr11	35123198	35123788
chr11	35128560	35130088
chr11	35565964	35567018
chr11	35569441	35570896
chr11	35622782	35624808
chr11	35737483	35738894
chr11	35814711	35817904
chr11	35832625	35833633
chr11	35878800	35879493
chr11	35906783	35907825
chr11	35910561	35911267
chr11	36744481	36745759
chr11	36893860	36894567
chr11	37142094	37143798
chr11	37616452	37617227
chr11	37633867	37636087
chr11	37784429	37784969
chr11	40194241	40195559
chr11	40391229	40392148
chr11	41396441	41396912
chr11	41418261	41419001
chr11	41419149	41419712
chr11	42507949	42508650
chr11	42831444	42833276
chr11	43164680	43165772
chr11	43170605	43171620
chr11	43173878	43174291
chr11	43192348	43193229
chr11	43209352	43209856
chr11	43331551	43333176
chr11	43566094	43566750
chr11	43969389	43970461
chr12	14631	15875
chr12	96458	97665
chr12	137065	137581
chr12	592614	593515
chr12	1284080	1284889
chr12	1434727	1436048
chr12	1653886	1654537
chr12	2451902	2452431
chr12	2459352	2459913
chr12	2514577	2515128
chr12	2891099	2891920
chr12	2922433	2922956
chr12	2926657	2927762
chr12	3404320	3404870
chr12	4172984	4174134
chr12	5058318	5058792
chr12	5961172	5962502
chr12	6723517	6725020
chr12	6871605	6872974
chr12	7679837	7680827
chr12	7681330	7681935
chr12	8630974	8631483
chr12	8701952	8702920
chr12	8743520	8744101
chr12	8763140	8764690
chr12	8830410	8831899
chr12	9014571	9016321
chr12	9023274	9024599
chr12	9039468	9040346
chr12	9096110	9097670
chr12	9098579	9099985
chr12	9103995	9105119
chr12	9107502	9108532
chr12	9132278	9133293
chr12	9220224	9221649
chr12	9283963	9285380
chr12	9289564	9291448
chr12	9296008	9298033
chr12	9298367	9299996
chr12	9351563	9352162
chr12	9385640	9386791
chr12	9388069	9389741
chr12	9400450	9403101
chr12	9405136	9406610
chr12	9410565	9412860
chr12	9739180	9739938
chr12	9845910	9846560
chr12	11199034	11201522
chr12	11221941	11222430
chr12	11422533	11423062
chr12	11486325	11487257
chr12	11659360	11660257
chr12	11742322	11742914
chr12	11754075	11754742
chr12	11757901	11759999
chr12	11768899	11769388
chr12	14042119	14043201
chr12	14050412	14051337
chr12	14159779	14161237
chr12	14498583	14499247
chr12	15898341	15899279
chr12	16049887	16050946
chr12	16117869	16118550
chr12	16130450	16130966
chr12	16142082	16142935
chr12	16187797	16188922
chr12	16775877	16777116
chr12	17110178	17112971
chr12	17892504	17893547
chr12	18099964	18102883
chr12	18246040	18246607
chr12	18251860	18252621
chr12	19588468	19590606
chr12	19907009	19907476
chr12	20575116	20575777
chr12	20585608	20587332
chr12	20764098	20765438
chr12	20769407	20771871
chr12	20927210	20928876
chr12	21069418	21072591
chr12	21157716	21158374
chr12	21159822	21161740
chr12	21162823	21163600
chr12	21249771	21250562
chr12	21431907	21432257
chr12	21458882	21459750
chr12	21479097	21480397
chr12	21481974	21482509
chr12	21860692	21861443
chr12	22055592	22056534
chr12	22109657	22110960
chr12	22168001	22168443
chr12	22215207	22216058
chr12	22318165	22318749
chr12	22501067	22501743
chr12	22556419	22557999
chr12	22558703	22559289
chr12	22567267	22568796
chr12	22570242	22571677
chr12	22575401	22576389
chr12	22579166	22581286
chr12	22596556	22599741
chr12	22609628	22610489
chr12	22613608	22615206
chr12	22682166	22684525
chr12	22684830	22685953
chr12	23422200	23423245
chr12	23432408	23432819
chr12	23435291	23438039
chr12	23790131	23791178
chr12	23916770	23918766
chr12	23920900	23922075
chr12	24480424	24482735
chr12	24493218	24493793
chr12	24776997	24778705
chr12	24815512	24816419
chr12	24873132	24874096
chr12	25368383	25370778
chr12	25943530	25944433
chr12	26016704	26017761
chr12	26201181	26201653
chr12	26379251	26379826
chr12	26478906	26479508
chr12	26576328	26580569
chr12	26762622	26763342
chr12	26816699	26817415
chr12	27301615	27302425
chr12	27386933	27387568
chr12	27470602	27473704
chr12	27733830	27734788
chr12	27738793	27739996
chr12	27826692	27827357
chr12	27971951	27973158
chr12	27987760	27988903
chr12	28411545	28412085
chr12	28696448	28698981
chr12	29087165	29088720
chr12	29181794	29183978
chr12	29299212	29299719
chr12	29520084	29521044
chr12	29864269	29868006
chr12	29902760	29904313
chr12	30149295	30150391
chr12	30223328	30223857
chr12	30238801	30239719
chr12	30272455	30273483
chr12	30277921	30278778
chr12	30280086	30280649
chr12	30282464	30283003
chr12	30623208	30623736
chr12	31047195	31047801
chr12	31621706	31623144
chr12	31623175	31624124
chr12	31639086	31641546
chr12	32096208	32097788
chr12	32118293	32118886
chr12	32242333	32245477
chr12	32249336	32252125
chr12	32252129	32252920
chr12	32459698	32460410
chr12	32890784	32891645
chr12	32906779	32908307
chr12	32943823	32945046
chr12	32947318	32947890
chr12	33400904	33402349
chr12	33912243	33913689
chr12	34174229	34175365
chr12	34274279	34275051
chr12	34572137	34572905
chr12	34726577	34727677
chr12	34940271	34940936
chr12	35184861	35185938
chr12	35507202	35509229
chr12	35531369	35531846
chr12	35882473	35883057
chr12	36091392	36091932
chr12	36118932	36121966
chr12	36305204	36305689
chr12	36397108	36400482
chr12	36790732	36791514
chr12	36843043	36843542
chr12	36844329	36844995
chr12	37405808	37407081
chr12	37426930	37428407
chr12	37464155	37465225
chr12	37475541	37476375
chr12	37893196	37894253
chr12	38044876	38045555
chr12	38170228	38171290
chr12	38180349	38180849
chr12	38259584	38261567
chr12	38478614	38479329
chr12	39275343	39275875
chr12	41253841	41254377
chr12	41272962	41275542
chr12	41364956	41365563
chr12	41377280	41378263
chr12	41698373	41699451
chr12	41710433	41711875
chr12	42278633	42279417
chr12	42518130	42519159
chr12	43025810	43027810
chr12	43172080	43172953
chr12	43233665	43234763
chr12	43319892	43321947
chr12	43833517	43834396
chr12	43879907	43880419
chr12	43968971	43969861
chr12	45414449	45415751
chr12	46417395	46417939
chr13	671427	672770
chr13	1258797	1259365
chr13	1540869	1541885
chr13	1551018	1553191
chr13	1557782	1559905
chr13	1781929	1782477
chr13	1844554	1845143
chr13	2065003	2065885
chr13	2642499	2643352
chr13	2660814	2661622
chr13	3244360	3245325
chr13	3266732	3267382
chr13	3278329	3278736
chr13	3462889	3464468
chr13	3696684	3697222
chr13	3837325	3839418
chr13	3870179	3870670
chr13	3960295	3960838
chr13	3979592	3980643
chr13	4051706	4052728
chr13	4188137	4189126
chr13	4430361	4431160
chr13	4513404	4515616
chr13	4667246	4667822
chr13	4773382	4773923
chr13	4903861	4904386
chr13	5152286	5153987
chr13	5460508	5460963
chr13	5477003	5477669
chr13	5484852	5485337
chr13	5496000	5496981
chr13	5500615	5501289
chr13	5502558	5503591
chr13	5631905	5632343
chr13	5634190	5635029
chr13	5661688	5662414
chr13	5690131	5691589
chr13	5794630	5796560
chr13	5947167	5947803
chr13	6131786	6132640
chr13	6219567	6220355
chr13	6464052	6465541
chr13	6636152	6637526
chr13	6792801	6793895
chr13	6808359	6810739
chr13	6875774	6877327
chr13	6956689	6957311
chr13	7551334	7552166
chr13	7677115	7678114
chr13	7795884	7797206
chr13	7799991	7800873
chr13	7803758	7806152
chr13	7808237	7809319
chr13	7824923	7825525
chr13	7892222	7892754
chr13	8114981	8115728
chr13	8255242	8256495
chr13	8970774	8973031
chr13	9597863	9599144
chr13	9723907	9724975
chr13	9759747	9760497
chr13	10219361	10221396
chr13	10658467	10659483
chr13	11297181	11297896
chr13	11386146	11387970
chr13	11448614	11450101
chr13	11909394	11910243
chr13	12187523	12188046
chr13	13199867	13201380
chr13	13222769	13223925
chr13	13341376	13341928
chr13	15573557	15574645
chr13	15577965	15578698
chr13	16050609	16051193
chr13	16367253	16369219
chr13	16906211	16907127
chr13	18131707	18132624
chr13	18173341	18175471
chr13	18639372	18641055
chr13	18674970	18676065
chr13	18949926	18952042
chr13	18975674	18976464
chr13	19121054	19122742
chr13	19565000	19566158
chr13	19761335	19762039
chr13	19899437	19901135
chr13	20201789	20202557
chr13	20481542	20482351
chr13	20486520	20489141
chr13	21924651	21925206
chr13	21940573	21943779
chr13	21948937	21949991
chr13	21966065	21967177
chr13	22383859	22386073
chr13	22564033	22565246
chr13	22586886	22587413
chr13	22644638	22645417
chr13	22808791	22809627
chr13	22878276	22878789
chr13	23106258	23106821
chr13	23756572	23757431
chr13	24001611	24002772
chr13	24142207	24143679
chr13	24489499	24490091
chr13	24492887	24493593
chr13	25282347	25283871
chr13	25295760	25296393
chr13	25365784	25366244
chr13	25577536	25578078
chr13	25650841	25651440
chr13	25717170	25718084
chr13	25885585	25887145
chr13	25918077	25919067
chr13	25925354	25927131
chr13	26139107	26139803
chr13	26482103	26482821
chr13	26631258	26631932
chr13	26669498	26671091
chr13	26696191	26696902
chr13	26797800	26799493
chr13	26809989	26810475
chr13	26908514	26909361
chr13	27121440	27122216
chr13	27125459	27126599
chr13	27133416	27134048
chr13	27653063	27655666
chr13	27670993	27672427
chr13	27672432	27673980
chr13	27674572	27676874
chr13	27677090	27678042
chr13	28016433	28016987
chr13	28511323	28511827
chr13	28531330	28532259
chr13	28546286	28547055
chr13	28649832	28650957
chr13	29082066	29083480
chr13	29255126	29257062
chr13	29364936	29367968
chr13	29481525	29482327
chr13	29760261	29761323
chr13	29826506	29827281
chr13	29833973	29835269
chr13	29943848	29944462
chr13	30096162	30097422
chr13	30114176	30115715
chr13	30118939	30119839
chr13	30437123	30437579
chr13	30440598	30441500
chr13	30454658	30455958
chr13	30496455	30498056
chr13	30825931	30826595
chr13	30975935	30976432
chr13	31172593	31173312
chr13	31207092	31207983
chr13	31482836	31483292
chr13	31666838	31668741
chr13	31680858	31682436
chr13	31682584	31683506
chr13	31687821	31689927
chr13	31690632	31691578
chr13	31694006	31694862
chr13	31705824	31706654
chr13	31712376	31713672
chr13	31716827	31718452
chr13	31718501	31720872
chr13	31935066	31936149
chr13	32184624	32185260
chr13	32189829	32191041
chr13	32346016	32346690
chr13	32460546	32461668
chr13	32476469	32476965
chr13	32506079	32507346
chr13	32925897	32927212
chr13	33372839	33374941
chr13	33375780	33376276
chr13	33418466	33420646
chr13	33421865	33423621
chr13	33425021	33426639
chr13	33460532	33462312
chr13	33477588	33479159
chr13	33479275	33481355
chr13	33487201	33490011
chr13	33490313	33492586
chr13	33495629	33496487
chr13	33506482	33507230
chr13	33621955	33623659
chr13	33873647	33874291
chr13	34871111	34871981
chr13	34930375	34931699
chr13	35048750	35049424
chr13	35082405	35084112
chr13	35098120	35099422
chr13	35244331	35244906
chr13	35246567	35247623
chr13	35247696	35248152
chr13	35255047	35256788
chr13	35349276	35349895
chr13	35503436	35504032
chr13	35508060	35508828
chr13	35515846	35516817
chr13	35520199	35520803
chr13	36301224	36303601
chr13	36655436	36656603
chr13	36750623	36752223
chr13	36979000	36979762
chr13	37026347	37026910
chr13	37252368	37253969
chr13	37464360	37465720
chr13	37483743	37484757
chr13	37527527	37527962
chr13	38022509	38023751
chr13	38227383	38228998
chr13	38551728	38553477
chr13	38562749	38563655
chr13	39594356	39595050
chr13	39650937	39652690
chr13	40040821	40041706
chr13	40515657	40516737
chr13	40759201	40760053
chr13	41135770	41136868
chr13	41229618	41230208
chr13	41408071	41408813
chr13	41811996	41813156
chr13	41815071	41816055
chr13	41816125	41817088
chr13	41977479	41978892
chr13	42482864	42485657
chr13	42694793	42697355
chr13	43063341	43064155
chr13	43299711	43300309
chr13	43303223	43304578
chr13	43337233	43338764
chr13	43860888	43861449
chr13	43963492	43967874
chr13	43970828	43971507
chr13	43972553	43973771
chr13	43974431	43976778
chr13	43980542	43982365
chr13	43986565	43988635
chr13	43993778	43996510
chr13	44711308	44712023
chr13	44712077	44712895
chr13	45016908	45018841
chr13	45308609	45309308
chr13	45312266	45314097
chr13	45325730	45326611
chr13	45779262	45780725
chr13	46342529	46343875
chr13	46508317	46509308
chr13	46553357	46554206
chr13	46694599	46695441
chr13	46695862	46696963
chr13	46789498	46791352
chr13	46791371	46791899
chr13	47650984	47652350
chr13	48106366	48108427
chr13	48176940	48177584
chr13	48265839	48267292
chr13	48680333	48681335
chr13	48994448	48995191
chr13	49029476	49029952
chr13	49044437	49045201
chr13	49647501	49648504
chr13	49679318	49680116
chr13	50025875	50026651
chr14	79183	80164
chr14	155936	156994
chr14	165488	166642
chr14	232315	233013
chr14	287998	288826
chr14	979116	979992
chr14	1517479	1519198
chr14	1867275	1868534
chr14	1869390	1870500
chr14	1885149	1885658
chr14	1886005	1887483
chr14	2043339	2043894
chr14	3233478	3234323
chr14	3508790	3510779
chr14	3866710	3867760
chr14	4201252	4201916
chr14	5083044	5084180
chr14	5188714	5189255
chr14	5204449	5204994
chr14	5231980	5232906
chr14	5745082	5746391
chr14	5829551	5832130
chr14	6437259	6438350
chr14	6440279	6441265
chr14	6476464	6478443
chr14	6496456	6497479
chr14	6924168	6924726
chr14	6985377	6988540
chr14	6989050	6991913
chr14	7509683	7510367
chr14	8256912	8257957
chr14	8421628	8423343
chr14	11048369	11049867
chr14	11061562	11062783
chr14	11073988	11076653
chr14	11119108	11123332
chr14	13082244	13084504
chr14	13230106	13230593
chr14	13290125	13291188
chr14	13522954	13525815
chr14	15129741	15131330
chr14	15168696	15169712
chr14	15171031	15171639
chr14	15597264	15599082
chr14	15867731	15868856
chr14	15998303	15998929
chr14	16098681	16099486
chr14	16111259	16113550
chr14	16114320	16116343
chr14	16127280	16128452
chr14	16146879	16149385
chr14	16414832	16416919
chr14	17287610	17288292
chr14	18225269	18225775
chr14	18237121	18237713
chr14	18428620	18429167
chr14	18662654	18665047
chr14	19076791	19078181
chr14	19167546	19168527
chr14	19196753	19197230
chr14	19882426	19883767
chr14	19946366	19949855
chr14	19992062	19993081
chr14	20396648	20397890
chr14	20455563	20456692
chr14	20760704	20761274
chr14	21158047	21158745
chr14	21828119	21828673
chr14	22135399	22136009
chr14	22143103	22144285
chr14	22354613	22355569
chr14	22670253	22670813
chr14	22896670	22897378
chr14	22904620	22905680
chr14	22909629	22910723
chr14	23008100	23009716
chr14	23152633	23154988
chr14	23272625	23274416
chr14	23772694	23773337
chr14	23971341	23971987
chr14	24430840	24431808
chr14	24513116	24514627
chr14	24618203	24618808
chr14	24689086	24690870
chr14	24764762	24765845
chr14	24827300	24829190
chr14	25046933	25048921
chr14	25286594	25287172
chr14	25650379	25651900
chr14	25653824	25654508
chr14	25699587	25700491
chr14	25776540	25777419
chr14	26011242	26012408
chr14	26025680	26027390
chr14	26027696	26030290
chr14	26049012	26050141
chr14	26097267	26098279
chr14	26201520	26203401
chr14	26203422	26204031
chr14	26282056	26282795
chr14	26285708	26287709
chr14	26579829	26580523
chr14	26842158	26842751
chr14	26845388	26846452
chr14	26900879	26904028
chr14	26987186	26988683
chr14	26988895	26989474
chr14	27039606	27042582
chr14	27282928	27284232
chr14	27370745	27372583
chr14	27378963	27380102
chr14	27381564	27388196
chr14	27390179	27390920
chr14	27522459	27524627
chr14	27768868	27769676
chr14	28194772	28196247
chr14	28489169	28489703
chr14	28969772	28970478
chr14	29395865	29397246
chr14	29398645	29400148
chr14	29418877	29421952
chr14	29424363	29427601
chr14	29428453	29429644
chr14	29430605	29431335
chr14	29897795	29898349
chr14	29903556	29904561
chr14	29910210	29911923
chr14	30104224	30105453
chr14	30700303	30701184
chr14	31023574	31024980
chr14	31048240	31048724
chr14	31935703	31936612
chr14	31938653	31939934
chr14	32112651	32113987
chr14	32119066	32120276
chr14	32165484	32166496
chr14	32273062	32275945
chr14	32375359	32376005
chr14	32446161	32447863
chr14	32449136	32451371
chr14	32885038	32886175
chr14	33168380	33169040
chr14	33187039	33189465
chr14	33194366	33195120
chr14	33199619	33203162
chr14	33430946	33434388
chr14	33627121	33628516
chr14	33823578	33824382
chr14	34161123	34163943
chr14	34164635	34165916
chr14	34169120	34173148
chr14	34222099	34225473
chr14	34283406	34284155
chr14	34597490	34599134
chr14	35122613	35123053
chr14	35161718	35162491
chr14	35742438	35743521
chr14	35807840	35809215
chr14	35836430	35837717
chr14	35911360	35912209
chr14	35966973	35967804
chr14	36005302	36006109
chr14	36007603	36010338
chr14	36029327	36030257
chr14	36036136	36039414
chr14	36536610	36537217
chr14	36816404	36817386
chr14	36931771	36932318
chr14	37082358	37083069
chr14	37112006	37112530
chr14	37226375	37227119
chr14	37409848	37410521
chr14	37423975	37424504
chr14	37625712	37626207
chr14	37735507	37736323
chr14	37836604	37837949
chr14	38233715	38234511
chr14	38247230	38248160
chr14	38642359	38642971
chr14	39036465	39037754
chr14	39062948	39063472
chr14	39067688	39068747
chr14	39102211	39104415
chr14	39147409	39149993
chr14	39150679	39151773
chr14	39152074	39155527
chr14	39156714	39159235
chr14	39162161	39163641
chr14	39176966	39177788
chr14	39180259	39182586
chr14	39183250	39183986
chr14	39290027	39290654
chr14	39540495	39541634
chr14	39751710	39752674
chr14	40262127	40263319
chr14	41028434	41030084
chr14	41048386	41050760
chr14	41093324	41095782
chr14	41126815	41127580
chr14	41152319	41154746
chr14	41199414	41199990
chr14	41273925	41274538
chr14	41348347	41348851
chr14	41408255	41410419
chr14	41454090	41454706
chr14	41472523	41473636
chr14	41509073	41510319
chr14	42626720	42627612
chr14	43780052	43780638
chr14	44266009	44267118
chr14	44589364	44590455
chr14	44593568	44595576
chr14	44598261	44599173
chr14	44664610	44665739
chr14	44786253	44788356
chr14	44843017	44843821
chr14	44870835	44872226
chr14	45690474	45691369
chr14	46534747	46535326
chr14	46596491	46597614
chr14	46623704	46625124
chr14	46632133	46633172
chr14	46645643	46646645
chr14	46671740	46673007
chr14	46684047	46684628
chr14	46687850	46689022
chr14	48287670	48290592
chr14	48443606	48444565
chr14	48483023	48483564
chr14	48484038	48484534
chr14	48489265	48490467
chr14	51549000	51550367
chr14	52220025	52220626
chr15	150925	152790
chr15	172285	172810
chr15	536475	537565
chr15	1241556	1242145
chr15	1463205	1463780
chr15	1473469	1474381
chr15	3877704	3878122
chr15	3897780	3898310
chr15	4153378	4154108
chr15	4157893	4158457
chr15	4684162	4684940
chr15	4752916	4753516
chr15	4864439	4865248
chr15	4896553	4898422
chr15	5126402	5128377
chr15	6303477	6305074
chr15	6633755	6634443
chr15	6876021	6877570
chr15	6891376	6892618
chr15	6893169	6895532
chr15	7908533	7909608
chr15	8219099	8220655
chr15	8285208	8288032
chr15	8303041	8304901
chr15	8685267	8686121
chr15	9544073	9545370
chr15	9620099	9621597
chr15	9623001	9624643
chr15	9626791	9628332
chr15	9730405	9730978
chr15	11116234	11117194
chr15	11721815	11723180
chr15	11929603	11930897
chr15	11971778	11972748
chr15	12071794	12072755
chr15	12173952	12174994
chr15	12485960	12486752
chr15	12717001	12717653
chr15	12791029	12791644
chr15	12978983	12979811
chr15	13263564	13264090
chr15	13406334	13407261
chr15	13481091	13481671
chr15	13489898	13491164
chr15	13529157	13529787
chr15	13741607	13742649
chr15	13804838	13806397
chr15	14284662	14285955
chr15	14335369	14337195
chr15	14425258	14426447
chr15	14487932	14489182
chr15	14676372	14677818
chr15	14936185	14937777
chr15	14946649	14949001
chr15	15369442	15370894
chr15	15386152	15387122
chr15	15595059	15595590
chr15	15793786	15795661
chr15	15830780	15832000
chr15	15832535	15835889
chr15	16230305	16231838
chr15	16332096	16334599
chr15	16337016	16340053
chr15	16721286	16722434
chr15	16723544	16725205
chr15	16737921	16738333
chr15	16753655	16754234
chr15	16955016	16955950
chr15	17112486	17113380
chr15	17250251	17250754
chr15	17306848	17309609
chr15	18778843	18779836
chr15	19597534	19598168
chr15	19601280	19602160
chr15	20487056	20487885
chr15	20661635	20664010
chr15	20868382	20868888
chr15	20869737	20870595
chr15	20918370	20920324
chr15	20938823	20939359
chr15	21059185	21060165
chr15	21418374	21419529
chr15	21628193	21629809
chr15	21638658	21639151
chr15	21680284	21681518
chr15	21978071	21978784
chr15	21978979	21979587
chr15	22464055	22464659
chr15	22479921	22481861
chr15	22487855	22491774
chr15	22502280	22504747
chr15	22575730	22577467
chr15	22608695	22610510
chr15	22948326	22949008
chr15	23010688	23011845
chr15	23102868	23104703
chr15	23181811	23183501
chr15	23369547	23370626
chr15	23374887	23376616
chr15	23626947	23628195
chr15	23757652	23759312
chr15	23789235	23789760
chr15	23789827	23790371
chr15	23841785	23842314
chr15	24008804	24009384
chr15	24172963	24173597
chr15	24575886	24576912
chr15	24582236	24584007
chr15	24643335	24643949
chr15	24796643	24797817
chr15	24810025	24810553
chr15	24815849	24817479
chr15	25055612	25056618
chr15	25087177	25087779
chr15	25108211	25108775
chr15	25127441	25128301
chr15	25139031	25139560
chr15	25169067	25169896
chr15	25668291	25668966
chr15	25874092	25876510
chr15	25876522	25876979
chr15	25877949	25879196
chr15	25884650	25885241
chr15	25894273	25898765
chr15	26036167	26037042
chr15	26068209	26068937
chr15	26097309	26097997
chr15	27531915	27532399
chr15	27858873	27860838
chr15	28311445	28312027
chr15	28330470	28331657
chr15	28806588	28807930
chr15	28911069	28912285
chr15	28970031	28971483
chr15	29016412	29017938
chr15	29079109	29079698
chr15	29141021	29143149
chr15	30209703	30212620
chr15	30234506	30236170
chr15	30622684	30623744
chr15	30844312	30845746
chr15	31087847	31088363
chr15	31410688	31413017
chr15	31452140	31452573
chr15	31477256	31477700
chr15	31632522	31633504
chr15	31647792	31648759
chr15	32123063	32124055
chr15	32245758	32246339
chr15	32550418	32550896
chr15	32709511	32710376
chr15	33060972	33061602
chr15	33153827	33154564
chr15	33523559	33524075
chr15	33532380	33533449
chr15	33537396	33539460
chr15	33540652	33541351
chr15	33557779	33558943
chr15	33575045	33575920
chr15	33578164	33578986
chr15	33583685	33584392
chr15	33599298	33600699
chr15	33600710	33601623
chr15	33832436	33833732
chr15	33976374	33976895
chr15	34103268	34104168
chr15	34185127	34185942
chr15	34217430	34218815
chr15	34269134	34269702
chr15	34384409	34385248
chr15	34395383	34396337
chr15	35427363	35427856
chr15	35845562	35846377
chr15	35975451	35976570
chr15	35985030	35986444
chr15	36195352	36195908
chr15	36400472	36400950
chr15	36402664	36404768
chr15	36418449	36419449
chr15	36435065	36436417
chr15	36529922	36531092
chr15	36724925	36726468
chr15	37012219	37014742
chr15	39174034	39174905
chr15	39189018	39189776
chr15	39190887	39192238
chr15	39195478	39196408
chr15	39565192	39566799
chr15	39663931	39664826
chr15	39734372	39735243
chr15	39748426	39749182
chr15	39847794	39848764
chr15	39951702	39952660
chr15	39961578	39964149
chr15	40105166	40105798
chr15	40300761	40301358
chr15	40470834	40471380
chr15	40945591	40947744
chr15	41017730	41018895
chr15	41107797	41108688
chr15	41113394	41114960
chr15	41154961	41156532
chr15	41194465	41195819
chr15	42060312	42063931
chr15	42063989	42064720
chr15	42299840	42303423
chr15	42369610	42370722
chr15	42703865	42704887
chr15	42712671	42713532
chr15	43809291	43810228
chr15	43828293	43829021
chr15	44447814	44448634
chr15	44904581	44905153
chr15	45887082	45888760
chr15	45891680	45893418
chr15	46111029	46111635
chr15	46399019	46399376
chr15	46766381	46768485
chr15	46769967	46770639
chr16	205964	207600
chr16	785825	786449
chr16	786527	787823
chr16	881864	882729
chr16	935512	936241
chr16	1178210	1178968
chr16	1185366	1186499
chr16	1187562	1187956
chr16	1189805	1190375
chr16	1238803	1240122
chr16	1783984	1785775
chr16	1785917	1787172
chr16	2159986	2160774
chr16	2638010	2638455
chr16	2795228	2796519
chr16	3379208	3380504
chr16	3749037	3749645
chr16	3749681	3750723
chr16	3912937	3913566
chr16	3913635	3914656
chr16	3915463	3916366
chr16	3988113	3989106
chr16	4004090	4004566
chr16	4592401	4594234
chr16	4685483	4686051
chr16	4704793	4705788
chr16	4982486	4983439
chr16	5170078	5174278
chr16	5186469	5187789
chr16	5648047	5648529
chr16	5829178	5830159
chr16	6417981	6419152
chr16	6469724	6471428
chr16	6483802	6486053
chr16	6549310	6551665
chr16	6552181	6553042
chr16	6617470	6619047
chr16	6894972	6895864
chr16	6905923	6906871
chr16	7194550	7196230
chr16	7414579	7416213
chr16	7740532	7741725
chr16	8377436	8378096
chr16	8426844	8427572
chr16	8602781	8603649
chr16	8805003	8805757
chr16	9026179	9027614
chr16	9028261	9028956
chr16	9115240	9116182
chr16	9531356	9532053
chr16	9630256	9631528
chr16	9732602	9734409
chr16	9739431	9740676
chr16	11521560	11522403
chr16	11930058	11930709
chr16	12049304	12051357
chr16	12146548	12147242
chr16	12160835	12162413
chr16	12236243	12236819
chr16	12299119	12299589
chr16	12339780	12341329
chr16	13063844	13065050
chr16	13668596	13669417
chr16	13670218	13670991
chr16	13672538	13672964
chr16	13728449	13729193
chr16	13734276	13734803
chr16	14301787	14302931
chr16	14888364	14888931
chr16	15211355	15212353
chr16	15213040	15213500
chr16	15262993	15263491
chr16	15800421	15801297
chr16	16289314	16291288
chr16	16295996	16298245
chr16	16930972	16931817
chr16	17032265	17033038
chr16	17033046	17033508
chr16	17506576	17507165
chr16	17878216	17878842
chr16	17892650	17895158
chr16	18050441	18051020
chr16	18716441	18716954
chr16	18993635	18994100
chr16	18994204	18994741
chr16	18999280	19000395
chr16	19014144	19015669
chr16	19130151	19131237
chr16	19142306	19144343
chr16	20118918	20121203
chr16	20924136	20924692
chr16	20931471	20931986
chr16	21647268	21650817
chr16	21667120	21667641
chr16	21760344	21762036
chr16	21784418	21786015
chr16	22079455	22080995
chr16	22127341	22128857
chr16	22525705	22526207
chr16	22679541	22681515
chr16	22862627	22863458
chr16	23381268	23382236
chr16	23420207	23420936
chr16	23797979	23798669
chr16	24019032	24019588
chr16	24228654	24229267
chr16	24745023	24748689
chr16	24760572	24761110
chr16	24767770	24768475
chr16	24867324	24867844
chr16	24882400	24883627
chr16	24941082	24942460
chr16	25159143	25160070
chr16	25224955	25225593
chr16	25315433	25316520
chr16	25369312	25370497
chr16	25496805	25497546
chr16	25660578	25661330
chr16	25688806	25689398
chr16	25976321	25977092
chr16	25981110	25981911
chr16	26147543	26149500
chr16	26168217	26169164
chr16	26526163	26528720
chr16	26690105	26690765
chr16	27204264	27205680
chr16	27236685	27237415
chr16	27646268	27647807
chr16	27762049	27763031
chr16	27803841	27804974
chr16	27820420	27821146
chr16	27853177	27855093
chr16	27871872	27872998
chr16	27927499	27927976
[truncated: 4,243 more rows]

## Sheet: Table_S5
Zv8_NA11329	35348	36042
Zv8_NA1282	7697	8843
Zv8_NA172	2899	3838			File	Differentially H3K27 acetylated regions
Zv8_NA1965	51163	51813			Stages	24hpf VS 48hpf
Zv8_NA2017	83210	84341			cut-off (q value)	0.05
Zv8_NA2043	1437	1825			cut-off (fold difference in tag number)	4
Zv8_NA2321	24983	25523
Zv8_NA2353	40200	40743
Zv8_NA2639	35483	36485
Zv8_NA2750	3399	4318
Zv8_NA2760	2071	2922
Zv8_NA2760	6024	7125
Zv8_NA2760	9448	10754
Zv8_NA2760	41036	41911
Zv8_NA2777	9337	12454
Zv8_NA2777	30390	30840
Zv8_NA3303	10120	11237
Zv8_NA3344	3186	4479
Zv8_NA3471	61403	61979
Zv8_NA3754	71572	71867
Zv8_NA3921	34686	35838
Zv8_NA3958	87768	88439
Zv8_NA4056	91961	92523
Zv8_NA4056	94214	95562
Zv8_NA4056	104434	104828
Zv8_NA4102	33257	35238
Zv8_NA4264	2235	2641
Zv8_NA4264	19698	20121
Zv8_NA4286	64667	65276
Zv8_NA4418	27158	27747
Zv8_NA4581	8149	8983
Zv8_NA4688	100251	101101
Zv8_NA4798	95310	95717
Zv8_NA5228	5656	5939
Zv8_NA6076	25254	25965
Zv8_NA6294	66932	67666
Zv8_NA7265	1513	2403
Zv8_NA8209	33806	34168
Zv8_NA8491	32739	33324
Zv8_scaffold2981	89907	90270
Zv8_scaffold3025	136689	137805
Zv8_scaffold3025	319385	319905
Zv8_scaffold3025	587083	588245
Zv8_scaffold3029	313232	313663
Zv8_scaffold3032	150145	151896
Zv8_scaffold3034	192006	192560
Zv8_scaffold3041	160344	160954
Zv8_scaffold3041	191290	192180
Zv8_scaffold3057	71532	72710
Zv8_scaffold3060	6759	8096
Zv8_scaffold3060	196539	197053
Zv8_scaffold3066	243187	245023
Zv8_scaffold3099	79874	80442
Zv8_scaffold3121	17337	18046
Zv8_scaffold3127	162791	163151
chr1	1051820	1052911
chr1	1221793	1223048
chr1	2013843	2014644
chr1	5017180	5017823
chr1	9923725	9925929
chr1	12542588	12543149
chr1	16868513	16870085
chr1	17358588	17359758
chr1	19971905	19972427
chr1	21380067	21381967
chr1	23637118	23637945
chr1	24465582	24466954
chr1	24506505	24507214
chr1	29656933	29657808
chr1	35032367	35032817
chr1	36616156	36617614
chr1	36650401	36651604
chr1	36688327	36690553
chr1	36707909	36708829
chr1	39098627	39099246
chr1	39111213	39112812
chr1	39149673	39150303
chr1	39164059	39165645
chr1	39621090	39622453
chr1	39809261	39810691
chr1	40345919	40346407
chr1	40376947	40377945
chr1	46696273	46697554
chr1	49336678	49338791
chr1	50836600	50837825
chr1	51066097	51066888
chr1	52567775	52568497
chr1	53862685	53863493
chr1	53920560	53921538
chr1	55564721	55565592
chr1	56955094	56955843
chr10	81495	83174
chr10	2098922	2100288
chr10	6884672	6886135
chr10	10794791	10795851
chr10	14528389	14529100
chr10	14597682	14598237
chr10	15730618	15731449
chr10	17843737	17844614
chr10	18437209	18437905
chr10	19043529	19044061
chr10	19861148	19861684
chr10	22427754	22428596
chr10	22646291	22646885
chr10	23406129	23406698
chr10	23407354	23407995
chr10	23667459	23668843
chr10	25089936	25091606
chr10	25096951	25097458
chr10	25098556	25099456
chr10	25122192	25124014
chr10	26212370	26212957
chr10	31375428	31376123
chr10	31471276	31472413
chr10	33420024	33420542
chr10	33512913	33513477
chr10	33819747	33820476
chr10	33823886	33824668
chr10	34875260	34875911
chr10	35517339	35520594
chr10	36335043	36336006
chr10	36453465	36454383
chr10	36902070	36903604
chr10	41550570	41551437
chr10	41558960	41560178
chr11	1464487	1465696
chr11	1746649	1747329
chr11	2329055	2330201
chr11	3520085	3521023
chr11	6811946	6812650
chr11	8086927	8088004
chr11	8253112	8253968
chr11	18419286	18421087
chr11	20757510	20758814
chr11	21824750	21825327
chr11	23800301	23801117
chr11	23937526	23938273
chr11	23952413	23953200
chr11	23961333	23962976
chr11	24878574	24879135
chr11	25535020	25535445
chr11	26657052	26657843
chr11	27604667	27605558
chr11	27658386	27659063
chr11	28078544	28079057
chr11	31608830	31609963
chr11	31665007	31666578
chr11	31683694	31684286
chr11	32371253	32372572
chr11	38561381	38562929
chr11	40331899	40332701
chr11	40953428	40954025
chr11	41031581	41032158
chr11	43512702	43513259
chr12	239507	240117
chr12	1437410	1437989
chr12	4730442	4732457
chr12	6892770	6894310
chr12	7679837	7680827
chr12	11794112	11795889
chr12	13443260	13443849
chr12	16143881	16144353
chr12	16163815	16165976
chr12	17039406	17040516
chr12	20428620	20430353
chr12	21314773	21316525
chr12	22727688	22728718
chr12	26240323	26241399
chr12	27437406	27438251
chr12	29069437	29069907
chr12	29087165	29088720
chr12	30272455	30273483
chr12	32459698	32460410
chr12	33681742	33682595
chr12	33784223	33785292
chr12	33912243	33913689
chr12	34368576	34369801
chr12	36938935	36939426
chr12	41263956	41265855
chr12	41266613	41268065
chr12	41368336	41369131
chr12	42490183	42490774
chr12	42551188	42551903
chr13	2213673	2214226
chr13	3874452	3875031
chr13	6159969	6160484
chr13	7150247	7150847
chr13	8114981	8115728
chr13	9223178	9223742
chr13	10549405	10550245
chr13	11955340	11956583
chr13	12227253	12228374
chr13	12794042	12795652
chr13	18952359	18953312
chr13	19047718	19048181
chr13	22464421	22464966
chr13	25262962	25264797
chr13	26744535	26746390
chr13	26747223	26748936
chr13	26797800	26799493
chr13	26908514	26909361
chr13	26938712	26939331
chr13	27080158	27080674
chr13	27197040	27198490
chr13	27399546	27400591
chr13	27431827	27432911
chr13	27540798	27541309
chr13	29282164	29284163
chr13	29623766	29625299
chr13	29930351	29931951
chr13	29938327	29939512
chr13	29940468	29941732
chr13	30056520	30057557
chr13	30228656	30229503
chr13	33472568	33473620
chr13	33487201	33490011
chr13	33910301	33912733
chr13	35244331	35244906
chr13	35352959	35354442
chr13	38022509	38023751
chr13	41226868	41227388
chr13	42709303	42712010
chr13	43860888	43861449
chr13	43980542	43982365
chr13	48971087	48972483
chr13	48974222	48975362
chr14	232315	233013
chr14	255768	256310
chr14	2867930	2868515
chr14	5060166	5061440
chr14	6970061	6970641
chr14	8421628	8423343
chr14	9149489	9150278
chr14	11596285	11597250
chr14	13079743	13081714
chr14	16088789	16089918
chr14	16089988	16091065
chr14	16103317	16104135
chr14	21695322	21695802
chr14	21848970	21850011
chr14	22143103	22144285
chr14	23772694	23773337
chr14	27347744	27348300
chr14	27390179	27390920
chr14	28260589	28261672
chr14	29430605	29431335
chr14	29440610	29441322
chr14	31883381	31884428
chr14	31936647	31937187
chr14	31938653	31939934
chr14	32696547	32698025
chr14	33252049	33253865
chr14	33627121	33628516
chr14	33839851	33841850
chr14	34207438	34208096
chr14	34283406	34284155
chr14	36011871	36012674
chr14	37830828	37831406
chr14	37831510	37832129
chr14	39062948	39063472
chr14	41472523	41473636
chr14	41509073	41510319
chr14	43218875	43219448
chr14	43791523	43792012
chr15	4605163	4605972
chr15	4821725	4822541
chr15	7207392	7208197
chr15	7217586	7218882
chr15	21516937	21518819
chr15	21539357	21540357
chr15	21540863	21541674
chr15	21628193	21629809
chr15	22863593	22864693
chr15	23159282	23160281
chr15	23730596	23731999
chr15	28146787	28147786
chr15	28147863	28150215
chr15	28168533	28170451
chr15	28188342	28189136
chr15	28192124	28193395
chr15	28349939	28351144
chr15	29079109	29079698
chr15	29443989	29444937
chr15	29549725	29550699
chr15	30305950	30306458
chr15	30722893	30723533
chr15	30771666	30772410
chr15	30775713	30776277
chr15	31477256	31477700
chr15	32123063	32124055
chr15	33153827	33154564
chr15	33828640	33830178
chr15	33857654	33858211
chr15	33976374	33976895
chr15	39880668	39881406
chr15	46363556	46364186
chr16	4701	5236
chr16	693029	693831
chr16	991673	992820
chr16	1061903	1062379
chr16	3083990	3084976
chr16	6835241	6836984
chr16	6916268	6916970
chr16	7275823	7276353
chr16	9570122	9570828
chr16	9575279	9576779
chr16	9581498	9582027
chr16	9594109	9595738
chr16	9764897	9765641
chr16	10001937	10003395
chr16	13672538	13672964
chr16	15966134	15967280
chr16	22092444	22093016
chr16	22179631	22180876
chr16	22899435	22900141
chr16	23123475	23124001
chr16	23149544	23151169
chr16	23354857	23356483
chr16	23360567	23361554
chr16	23375135	23376134
chr16	23381268	23382236
chr16	23420207	23420936
chr16	23505416	23507036
chr16	24086459	24087508
chr16	24227637	24228308
chr16	25155158	25155694
chr16	27781657	27782640
chr16	27906160	27907887
chr16	27908150	27909464
chr16	27919996	27927388
chr16	27927499	27927976
chr16	27935074	27936187
chr16	27941819	27943601
chr16	27959230	27961517
chr16	29392555	29394024
chr16	29395763	29396830
chr16	30029346	30030496
chr16	30033015	30033837
chr16	32147478	32148391
chr16	32238640	32239345
chr16	32280664	32281277
chr16	32304108	32305305
chr16	32375293	32376042
chr16	32527856	32528913
chr16	36852242	36853152
chr16	40181492	40183368
chr16	41059558	41060420
chr16	42944376	42945278
chr16	44230243	44230825
chr16	46626047	46627608
chr16	46786229	46787673
chr16	47632813	47633956
chr16	48321945	48322467
chr17	4622480	4623129
chr17	7195519	7196262
chr17	7454793	7455654
chr17	7776539	7777070
chr17	8353429	8353860
chr17	8594672	8596446
chr17	9455593	9456171
chr17	9522538	9523056
chr17	9572497	9573101
chr17	9621524	9622094
chr17	9626982	9627387
chr17	9642555	9644382
chr17	9660853	9661625
chr17	10845964	10846896
chr17	13813478	13814091
chr17	14914298	14915177
chr17	15346114	15346578
chr17	15783423	15784190
chr17	18131512	18132235
chr17	18243256	18243935
chr17	18434932	18435613
chr17	20682634	20683409
chr17	21748159	21748991
chr17	22065589	22066139
chr17	22148706	22149787
chr17	22156073	22156799
chr17	22224277	22225055
chr17	24610917	24612027
chr17	24724233	24724945
chr17	25575177	25576226
chr17	26500652	26501146
chr17	26508927	26509676
chr17	27631341	27632058
chr17	27905180	27907043
chr17	28730101	28730583
chr17	30174049	30175396
chr17	30176422	30177196
chr17	30178480	30180102
chr17	30992215	30994125
chr17	32247606	32248169
chr17	33108561	33109337
chr17	34816181	34816716
chr17	39546141	39546695
chr17	41199296	41200641
chr17	41200724	41201280
chr17	43144491	43145343
chr17	44627371	44630514
chr17	46164768	46165528
chr17	48216625	48217624
chr17	48568967	48570026
chr18	2675860	2676470
chr18	2909338	2909865
chr18	4744726	4745278
chr18	4758568	4760797
chr18	4764217	4765399
chr18	4781519	4782967
chr18	4832160	4833381
chr18	4834550	4835838
chr18	8680673	8682497
chr18	10766740	10767934
chr18	11709757	11710344
chr18	18180059	18183864
chr18	18288539	18289869
chr18	19553574	19554551
chr18	20148423	20149013
chr18	20419255	20419781
chr18	20706777	20707524
chr18	21149917	21150683
chr18	21169713	21170428
chr18	22972005	22972700
chr18	23226654	23227706
chr18	23798819	23800356
chr18	24704120	24704789
chr18	27215265	27215912
chr18	27903414	27904010
chr18	28072654	28073831
chr18	28084858	28086180
chr18	31415958	31416580
chr18	38464175	38464736
chr18	42356027	42356489
chr18	45012835	45013795
chr18	45380178	45380700
chr18	45613934	45614723
chr18	47989848	47990684
chr19	992190	992713
chr19	994818	995479
chr19	1181854	1182402
chr19	1835904	1836670
chr19	3499811	3500614
chr19	4488930	4489471
chr19	5085524	5086128
chr19	6113150	6113956
chr19	7714151	7714861
chr19	7755011	7755678
chr19	9066245	9067816
chr19	9072470	9073000
chr19	9087057	9088843
chr19	9146546	9147692
chr19	11263891	11265373
chr19	12039499	12041039
chr19	12077149	12078380
chr19	15221994	15222583
chr19	17091302	17093074
chr19	17101355	17101948
chr19	17544190	17545133
chr19	18758043	18759548
chr19	20057391	20058061
chr19	20376322	20378675
chr19	20822704	20824364
chr19	21939979	21940936
chr19	24708603	24709971
chr19	27276691	27278248
chr19	27859033	27860108
chr19	27905169	27906903
chr19	27977414	27978540
chr19	28491423	28492047
chr19	31211298	31211842
chr19	32866769	32867589
chr19	34088140	34088616
chr19	36459485	36459995
chr19	37151524	37152080
chr19	39137498	39139205
chr19	41663047	41663944
chr19	43622078	43622682
chr19	44936528	44937009
chr2	1804095	1804757
chr2	2900347	2901048
chr2	9789518	9790093
chr2	10329485	10330951
chr2	14378178	14378670
chr2	15231293	15232143
chr2	16614487	16615154
chr2	20016767	20017485
chr2	20827766	20828339
chr2	24986820	24987333
chr2	26555588	26556512
chr2	27404226	27404840
chr2	27880913	27881827
chr2	27987675	27988380
chr2	29461708	29463391
chr2	30933176	30934155
chr2	30939934	30940912
chr2	31342886	31343741
chr2	33350651	33351355
chr2	35372687	35374249
chr2	40786024	40788215
chr2	41829435	41830631
chr2	46294541	46296504
chr2	46378457	46379196
chr2	53481125	53481679
chr2	53727276	53727882
chr2	53892966	53894433
chr2	56730674	56732178
chr2	56734256	56734999
chr2	56742874	56743929
chr20	1630831	1631851
chr20	4571514	4572390
chr20	4810481	4811035
chr20	4823716	4825851
chr20	7344387	7345769
chr20	9613537	9614175
chr20	9977350	9977946
chr20	15817619	15818355
chr20	16366872	16367477
chr20	16809541	16810906
chr20	16873573	16875021
chr20	17564385	17564947
chr20	19779227	19780424
chr20	19876756	19877379
chr20	20028594	20030816
chr20	20056208	20056741
chr20	20081645	20082387
chr20	20086243	20088080
chr20	20403057	20403777
chr20	24860333	24861015
chr20	27164696	27165415
chr20	27584775	27585672
chr20	28152185	28154171
chr20	29656540	29658360
chr20	29860837	29861464
chr20	29916980	29917482
chr20	29957795	29958339
chr20	29986874	29988397
chr20	30022066	30023347
chr20	30144087	30144975
chr20	30493686	30495154
chr20	34140315	34141028
chr20	34292987	34294631
chr20	38506267	38507168
chr20	38794577	38795457
chr20	38827354	38827984
chr20	38862305	38863489
chr20	38868521	38869631
chr20	38903012	38903921
chr20	39750294	39750814
chr20	45074118	45074692
chr20	47308187	47308891
chr20	47319374	47320348
chr21	2101311	2101881
chr21	2108026	2108868
chr21	10218280	10219011
chr21	10444790	10445360
chr21	16102322	16103358
chr21	16585156	16586279
chr21	18325592	18326166
chr21	18511882	18513542
chr21	18733397	18733969
chr21	19029935	19031933
chr21	19055083	19056160
chr21	23577288	23577984
chr21	24300158	24301589
chr21	25577868	25578445
chr21	25633673	25634452
chr21	25934213	25934770
chr21	26413103	26414142
chr21	26728902	26729837
chr21	29163091	29163735
chr21	29379085	29380807
chr21	31137180	31138128
chr21	32335727	32336196
chr21	34474404	34475883
chr21	35346723	35347937
chr21	36410032	36410650
chr21	36876053	36876821
chr21	37559109	37560197
chr21	38427222	38428358
chr21	39464581	39466864
chr21	40009555	40011053
chr21	40113987	40114687
chr21	41971181	41971749
chr21	46084100	46084658
chr21	46499466	46499959
chr22	5105755	5107967
chr22	11933773	11934571
chr22	12674658	12675228
chr22	13637085	13638691
chr22	14557175	14557700
chr22	16816552	16817433
chr22	17036555	17037861
chr22	17072397	17074028
chr22	17554048	17554762
chr22	18107526	18108723
chr22	18430831	18432218
chr22	18433929	18434496
chr22	18434593	18437119
chr22	18440475	18441138
chr22	18445827	18446864
chr22	18448988	18449545
chr22	18462648	18463894
chr22	18464967	18466711
chr22	20599767	20600416
chr22	21875402	21875988
chr22	22049819	22050459
chr22	22686613	22687339
chr22	23927401	23928505
chr22	24127485	24128560
chr22	24144014	24146035
chr22	24166213	24166750
chr22	25405829	25406565
chr22	27434756	27435740
chr22	35402628	35403745
chr22	35520268	35520856
chr22	37948722	37949712
chr22	38364362	38364966
chr22	38682440	38684087
chr23	1722123	1723054
chr23	2418667	2419232
chr23	4278669	4279380
chr23	5493031	5494440
chr23	6745289	6745716
chr23	7957880	7958625
chr23	8676250	8676965
chr23	10744381	10746269
chr23	12960509	12961068
chr23	17137267	17138810
chr23	17140464	17142106
chr23	17156724	17157789
chr23	18115124	18116184
chr23	20886890	20887456
chr23	21410698	21411919
chr23	22225087	22226181
chr23	22377200	22378100
chr23	22608686	22611408
chr23	22882940	22883699
chr23	24293717	24295000
chr23	27331631	27332139
chr23	27415163	27416301
chr23	28206431	28206961
chr23	29460270	29461105
chr23	29639793	29640188
chr23	29844526	29845119
chr23	29899758	29900225
chr23	30766471	30767126
chr23	31384947	31385834
chr23	32288908	32290063
chr23	34868521	34869161
chr23	35423887	35424695
chr23	35822626	35823446
chr23	36353412	36354508
chr23	36868442	36869407
chr23	37003481	37005928
chr23	37277424	37278132
chr23	39108771	39109672
chr23	40111114	40112225
chr24	1858917	1859585
chr24	3079069	3080678
chr24	4368902	4369503
chr24	4617217	4618056
chr24	5862959	5866258
chr24	6566052	6567354
chr24	10566335	10567702
chr24	10995824	10996516
chr24	12028988	12029982
chr24	13110234	13112255
chr24	13455207	13455789
chr24	14443427	14444146
chr24	15969899	15970638
chr24	20068223	20069325
chr24	20077009	20078075
chr24	22100508	22101035
chr24	23104539	23105136
chr24	23109628	23110184
chr24	23309102	23310370
chr24	23804187	23805434
chr24	30500893	30502052
chr24	30568789	30569938
chr24	30712647	30713351
chr24	33539605	33540301
chr24	34242578	34243080
chr25	358287	358850
chr25	597588	598470
chr25	4606288	4606784
chr25	6328313	6328965
chr25	6676041	6678517
chr25	7413502	7415470
chr25	7420840	7422563
chr25	7514489	7515893
chr25	12360342	12360998
chr25	12522396	12524091
chr25	12540689	12541713
chr25	14599083	14600191
chr25	15000045	15001386
chr25	18136269	18137486
chr25	20471764	20472898
chr25	23075115	23075907
chr25	23581393	23581986
chr25	24887068	24888038
chr25	29724515	29725091
chr25	31510577	31511784
chr25	32169845	32170320
chr25	32826187	32827856
chr25	33835045	33835866
chr3	477654	478208
chr3	1231855	1232453
chr3	4784142	4785820
chr3	7658189	7659154
chr3	7662108	7662534
chr3	8212763	8213683
chr3	8344241	8345248
chr3	8885442	8886197
chr3	11544764	11545322
chr3	12382079	12382562
chr3	13995527	13996164
chr3	14056719	14057552
chr3	14289384	14291344
chr3	14398761	14399587
chr3	16315208	16316019
chr3	18501597	18502897
chr3	18758042	18758617
chr3	20162329	20163333
chr3	25103867	25104513
chr3	25377555	25378786
chr3	26050410	26052014
chr3	27559279	27560703
chr3	27824878	27826868
chr3	28123189	28124667
chr3	28232483	28233131
chr3	28246963	28247864
chr3	31181193	31181720
chr3	31496640	31498306
chr3	31500086	31501877
chr3	31675074	31675692
chr3	31689522	31690353
chr3	31697344	31698992
chr3	31714174	31715320
chr3	31717302	31717852
chr3	31723663	31724415
chr3	31763602	31765295
chr3	32493103	32494769
chr3	32570853	32571941
chr3	32619381	32620342
chr3	32630950	32631817
chr3	32761057	32762236
chr3	32766014	32767704
chr3	32780076	32781405
chr3	37520474	37522241
chr3	38613814	38614370
chr3	40736633	40738296
chr3	41153170	41154536
chr3	46347431	46351277
chr3	47215967	47216428
chr3	48345820	48347395
chr3	50549022	50549795
chr3	51737109	51737647
chr3	52759089	52759721
chr3	53374544	53375384
chr3	60287345	60289441
chr3	60340394	60340942
chr4	77205	78685
chr4	1483442	1484005
chr4	1895832	1896270
chr4	2364831	2365404
chr4	3117150	3118180
chr4	3346751	3347381
chr4	4751347	4752214
chr4	5484547	5485301
chr4	5722292	5722890
chr4	7848270	7849814
chr4	8009155	8010057
chr4	8085114	8086049
chr4	9235878	9236682
chr4	9386583	9387114
chr4	11072874	11073909
chr4	11758154	11758845
chr4	12303964	12305203
chr4	12552386	12553710
chr4	15535214	15535887
chr4	16311191	16311816
chr4	17045934	17046356
chr4	17243212	17245019
chr4	18475877	18477906
chr4	18487622	18490223
chr4	18809596	18811177
chr4	21141455	21142639
chr4	22245657	22247283
chr4	23210555	23211379
chr4	25421847	25422448
chr4	26337650	26338801
chr4	32647457	32648665
chr5	7141424	7143207
chr5	10263190	10264127
chr5	11202116	11203368
chr5	14070959	14071527
chr5	14091922	14092690
chr5	16162667	16163511
chr5	17608430	17609316
chr5	18314024	18315019
chr5	20054056	20054627
chr5	21504645	21505977
chr5	23524999	23526468
chr5	23534906	23535497
chr5	24356591	24357499
chr5	25596229	25596822
chr5	26223723	26224980
chr5	26676312	26677533
chr5	27471831	27472538
chr5	29653750	29654283
chr5	30880929	30882264
chr5	32858396	32859208
chr5	32938570	32939530
chr5	35451395	35452516
chr5	35541499	35542039
chr5	37270735	37271947
chr5	38498854	38501035
chr5	39810597	39811313
chr5	43856201	43857510
chr5	47370896	47373737
chr5	47900440	47901726
chr5	48969411	48972055
chr5	48989848	48992389
chr5	49095179	49095798
chr5	49099821	49100439
chr5	49103677	49104179
chr5	49104507	49105751
chr5	49111149	49113110
chr5	49118407	49120417
chr5	49126282	49128966
chr5	49134248	49135757
chr5	49153037	49153612
chr5	50040960	50041652
chr5	50518642	50519692
chr5	50996197	50997013
chr5	57243655	57245792
chr5	61203443	61204415
chr5	65585490	65586108
chr5	66112819	66113755
chr5	67593091	67593675
chr5	67679687	67680553
chr5	68117815	68118671
chr5	68132218	68132711
chr5	70366839	70367428
chr5	73475747	73477769
chr5	73900147	73900693
chr6	4680564	4681073
chr6	6888886	6890370
chr6	6892090	6894593
chr6	6899943	6901444
chr6	6902344	6903844
chr6	6940324	6941042
chr6	6953497	6954727
chr6	6963902	6964948
chr6	8952339	8953847
chr6	8969390	8970334
chr6	12821579	12825900
chr6	12874522	12875068
chr6	14469721	14471412
chr6	14947112	14947641
chr6	14951870	14953451
chr6	14968394	14968921
chr6	15181440	15183233
chr6	15956483	15957874
chr6	17760346	17761018
chr6	19489548	19490461
chr6	20456291	20458597
chr6	23876837	23878622
chr6	26276249	26276957
chr6	26502017	26503185
chr6	26708852	26709785
chr6	26748849	26749772
chr6	28550793	28551377
chr6	29542396	29542920
chr6	31270071	31270600
chr6	31881632	31882934
chr6	32320942	32321645
chr6	33738684	33739997
chr6	33965885	33966847
chr6	35496652	35497224
chr6	35731558	35732580
chr6	36461821	36462463
chr6	38764840	38765648
chr6	40270466	40271031
chr6	40879068	40880953
chr6	45198661	45199319
chr6	51638491	51639043
chr6	52902115	52903233
chr6	54303247	54303848
chr6	54504962	54506165
chr6	54514778	54515570
chr6	54568931	54570361
chr6	56503269	56503940
chr6	58001118	58001809
chr6	60199222	60199989
chr7	1392584	1393649
chr7	12969234	12969758
chr7	14328264	14329640
chr7	14345787	14347057
chr7	14357427	14359005
chr7	14370864	14373519
chr7	14375199	14376259
chr7	14379616	14380969
chr7	14389321	14390378
chr7	19664436	19665168
chr7	24025797	24026264
chr7	24212733	24214232
chr7	27386510	27387101
chr7	30781353	30782023
chr7	31008101	31008798
chr7	31098376	31099247
chr7	31111992	31113880
chr7	31518732	31519111
chr7	31855194	31856091
chr7	31857305	31858094
chr7	31892652	31894134
chr7	31997258	31997740
chr7	32424626	32425523
chr7	34178121	34179521
chr7	35263044	35264033
chr7	35580574	35581737
chr7	35922290	35923048
chr7	36825120	36825828
chr7	36899099	36899949
chr7	37230953	37231850
chr7	37316388	37317588
chr7	38359012	38359823
chr7	38731437	38732579
chr7	39392842	39393456
chr7	40974113	40974628
chr7	42758608	42759415
chr7	44009657	44010484
chr7	44173455	44176127
chr7	44193707	44195174
chr7	44435184	44435746
chr7	46088499	46089173
chr7	46130560	46132250
chr7	46677172	46678923
chr7	46756842	46757385
chr7	46761314	46762423
chr7	47067351	47068276
chr7	49231726	49232769
chr7	49621391	49621959
chr7	50196858	50198742
chr7	50304767	50305395
chr7	56684902	56686389
chr7	58404612	58405613
chr7	58626121	58626507
chr7	58776195	58776826
chr7	58869457	58870726
chr7	59095368	59096746
chr7	60615644	60616226
chr7	62850604	62851146
chr7	64543945	64544936
chr7	66678598	66679066
chr7	72012991	72013547
chr7	72013715	72014363
chr7	72604875	72605455
chr7	72614270	72615658
chr7	72642240	72643320
chr7	72699770	72701299
chr7	73080280	73082135
chr7	73094023	73094658
chr7	73934863	73935389
chr7	73935634	73936341
chr7	73971216	73972610
chr7	74024929	74026439
chr7	76091463	76092601
chr8	3103648	3105052
chr8	3130877	3131414
chr8	4366793	4367376
chr8	5129964	5130728
chr8	6086484	6087691
chr8	7922119	7923767
chr8	9251423	9252812
chr8	11458873	11459408
chr8	15179847	15181832
chr8	15316418	15317237
chr8	16334799	16335319
chr8	16391758	16392283
chr8	17341624	17342593
chr8	17344127	17344670
chr8	17564695	17565610
chr8	20425170	20425937
chr8	20910989	20911609
chr8	21053967	21055034
chr8	24010396	24012744
chr8	24066620	24067765
chr8	24075582	24076459
chr8	24100873	24102196
chr8	26900482	26901761
chr8	27286481	27287348
chr8	27552076	27552506
chr8	30790721	30791304
chr8	32031627	32032880
chr8	32070977	32071900
chr8	32365840	32366639
chr8	33524788	33525700
chr8	34675876	34676399
chr8	36521830	36522719
chr8	36778073	36778628
chr8	42285971	42287559
chr8	43451557	43452973
chr8	49188593	49189365
chr9	2209516	2210011
chr9	3451707	3452573
chr9	4622362	4623323
chr9	4841439	4841974
chr9	5925520	5926502
chr9	6047155	6047979
chr9	6077722	6078296
chr9	6147381	6148479
chr9	8736616	8739067
chr9	9094255	9094901
chr9	9599212	9599664
chr9	10356349	10357320
chr9	10842278	10842786
chr9	12581579	12583058
chr9	12669024	12669893
chr9	13757613	13758316
chr9	13968990	13969590
chr9	14312008	14313068
chr9	14413582	14414006
chr9	17590944	17591517
chr9	18045446	18046871
chr9	18050137	18051112
chr9	18059310	18060238
chr9	19702569	19703276
chr9	21026816	21028029
chr9	22563933	22564640
chr9	24726072	24726943
chr9	24804771	24806125
chr9	24887405	24888562
chr9	25414670	25415961
chr9	25463143	25464205
chr9	26065682	26066994
chr9	26838079	26838641
chr9	31102922	31104622
chr9	31394647	31395841
chr9	31718934	31720017
chr9	31825332	31826225
chr9	32552060	32553240
chr9	33186849	33188008
chr9	35023341	35024797
chr9	35427537	35428402
chr9	37007466	37009195
chr9	37885830	37887129
chr9	45293763	45294252
chr9	47274437	47275159
chr9	48333054	48333571
chr9	48738767	48739293
chr9	51672000	51672670

## Sheet: Table_S6
Dome_VS_80% epiboly H3K27ac differentially acetylated regions
cluster1				cluster2				cluster3
chrZV8_NA3328	122528	124655		chrZV8_SCAFFOLD3125	26755	27697		chrZV8_NA1946	17797	18518
chrZV8_SCAFFOLD3127	128663	132580		chr22	3670785	3673945		chrZV8_NA8152	316	795
chrZV8_SCAFFOLD3127	137914	138686		chr22	13052851	13053628		chrZV8_NA2168	13532	14630
chrZV8_SCAFFOLD3127	185020	186262		chr22	13058994	13061216		chrZV8_NA3328	286514	287430
chr22	4310821	4314041		chr22	13061807	13064074		chrZV8_SCAFFOLD3127	122243	123078
chr22	11387537	11389629		chr22	13480429	13480957		chrZV8_SCAFFOLD3127	167863	168424
chr22	14216882	14219919		chr22	13482755	13484847		chrZV8_SCAFFOLD3127	176694	177214
chr22	14228483	14229129		chr22	13530991	13532929		chrZV8_SCAFFOLD3123	117222	119277
chr22	14229869	14233247		chr22	13534245	13535909		chrZV8_SCAFFOLD3123	301831	302835
chr22	14235666	14236399		chr22	13564968	13565927		chrZV8_SCAFFOLD3123	350348	351615
chr3	3566165	3568502		chr22	13633318	13634543		chrZV8_NA3044	12685	13634
chr3	7013785	7015064		chr22	15899508	15901955		chrZV8_SCAFFOLD3121	245589	246567
chr3	7343051	7344575		chr22	15903614	15904782		chrZV8_NA3725	24695	26001
chr3	12505719	12507938		chr22	16493632	16494349		chr22	2776715	2777757
chr3	12704436	12705022		chr22	16494940	16495841		chr22	3563585	3564135
chr3	12876022	12876545		chr22	17000262	17003101		chr22	4052649	4054393
chr3	12879129	12881148		chr22	17003103	17005199		chr22	4122737	4123331
chr3	12881204	12881842		chr22	17008976	17010088		chr22	6462540	6464074
chr22	17233882	17234429		chr22	17017348	17019929		chr22	6542298	6543583
chr3	15067980	15069246		chr22	17020294	17021115		chr22	7302649	7304287
chr3	18998646	19001061		chr22	17021326	17024494		chr22	8030254	8030765
chr22	18037013	18038573		chr22	17095914	17096862		chr22	10818440	10819117
chr3	20259670	20261258		chr22	17107907	17108950		chr22	10925005	10925536
chr3	21472689	21475959		chr3	19571337	19572410		chr22	11996971	11997536
chr3	22152177	22153812		chr3	19860451	19862445		chr22	12136253	12137077
chr3	22210436	22211773		chr22	18434593	18437119		chr22	12385057	12386093
chr3	22252267	22253748		chr22	18798152	18799145		chr22	13222786	13224297
chr3	23710902	23714602		chr3	20368123	20370122		chr22	13225199	13225733
chr22	23633548	23634772		chr22	20522558	20523128		chr22	13624344	13625711
chr3	27698529	27700000		chr22	20524429	20526823		chr22	14068825	14070231
chr3	28148748	28151030		chr3	20681854	20683673		chr22	14306424	14307097
chr22	27032799	27034649		chr3	20728434	20729870		chr22	14470630	14472027
chr3	30568737	30569291		chr3	20772691	20776979		chr22	14526486	14527073
chr7	22729992	22730606		chr3	20796580	20800041		chr22	14527780	14528525
chr7	22731372	22733665		chr3	20898375	20899880		chr22	14573639	14574908
chr22	31187526	31188142		chr3	20902054	20903475		chr22	14576494	14577498
chr22	31188909	31190876		chr3	20905474	20905946		chr22	14579726	14580302
chr3	31769832	31770827		chr3	20905962	20907529		chr22	15767720	15768481
chr3	31771330	31774080		chr3	20908082	20909970		chr22	15875870	15876785
chr7	25130155	25130932		chr3	22688131	22690494		chr22	15894248	15894976
chr7	25608710	25611437		chr22	22512739	22515223		chr22	15921097	15921562
chr7	25612569	25613356		chr3	25895503	25898946		chr22	15946312	15947197
chr3	34929190	34930608		chr3	26050410	26052014		chr22	15953596	15954086
chr3	35354614	35355591		chr22	24317358	24319806		chr22	16401255	16402306
chr3	35357888	35358611		chr22	26767851	26769316		chr22	16971918	16973064
chr3	36614793	36615574		chr3	30231892	30232517		chr22	16979476	16983620
chr3	36797184	36797942		chr7	21787306	21789117		chr3	3008247	3009342
chr3	37692479	37693977		chr3	30508593	30510413		chr3	3937871	3938942
chr22	36793787	36794997		chr22	27456890	27459254		chr3	4704571	4705750
chr23	2604640	2606670		chr22	27459985	27461626		chr3	5083291	5084255
chr3	39417969	39420390		chr3	31586321	31588146		chr3	5748409	5751073
chr3	39594915	39597440		chr3	31853966	31854728		chr3	6710894	6712346
chr3	40056033	40058968		chr22	32704500	32705935		chr3	7233748	7235419
chr3	42188430	42190390		chr22	32842794	32844514		chr3	8266247	8266926
chr3	42431721	42434990		chr7	24811765	24814182		chr3	8852856	8853855
chr3	42441707	42442811		chr22	34809378	34811408		chr3	8882007	8882926
chr3	42837477	42842885		chr22	34811991	34816663		chr3	8891691	8892973
chr3	42843100	42844014		chr22	34816901	34817453		chr3	9771405	9771955
chr3	43280964	43285274		chr22	34820101	34821308		chr3	10041142	10042000
chr23	8852192	8855172		chr22	34821986	34823182		chr3	12361593	12362352
chr23	14034253	14034687		chr3	32820573	32821138		chr22	17030361	17031344
chr7	26709988	26715136		chr7	25322942	25325283		chr22	17036555	17037861
chr7	26716749	26718245		chr3	34121264	34122391		chr22	17038491	17039695
chr23	18411174	18412778		chr7	25679375	25680222		chr22	17065569	17066093
chr23	18780087	18782865		chr22	35391611	35393134		chr22	17068341	17068913
chr23	19203313	19205894		chr22	35575591	35577392		chr3	12930928	12931827
chr23	21107187	21107578		chr3	37719793	37721592		chr22	17210130	17211143
chr23	21109822	21113063		chr3	37723381	37725509		chr3	13356533	13357083
chr3	44830602	44832101		chr3	37760919	37761528		chr3	13946092	13947562
chr7	27832419	27833171		chr22	37004316	37013180		chr3	14313399	14314581
chr7	27838578	27840177		chr22	37660174	37662145		chr3	14316477	14317076
chr7	28812521	28814285		chr22	39230917	39231814		chr3	14330520	14331707
chr7	31192294	31194268		chr23	4668261	4669285		chr3	14335725	14336730
chr7	31291620	31295705		chr23	5235819	5239405		chr3	14346783	14347455
chr7	31298720	31300053		chr23	5965807	5969736		chr3	16235171	16236106
chr7	31572099	31575761		chr3	43859087	43860386		chr3	16725060	16725952
chr23	21880092	21885333		chr3	43862305	43865324		chr3	16892416	16892927
chr23	21950847	21953128		chr7	25827021	25827722		chr3	17033501	17035240
chr23	22056762	22058072		chr23	16662218	16664585		chr3	17063354	17064405
chr23	22195794	22198360		chr7	27396626	27399182		chr3	17417831	17419112
chr5	36239593	36240718		chr7	27400426	27402468		chr3	17439937	17440754
chr5	37016685	37017236		chr7	27414615	27416076		chr3	18683829	18684338
chr5	37045675	37046501		chr7	27421338	27423429		chr3	18794613	18795767
chr5	37049842	37050417		chr7	27427152	27428701		chr22	17697605	17698138
chr5	38026628	38029128		chr7	27431155	27432204		chr3	19397023	19397569
chr5	38030043	38031005		chr7	27488687	27489859		chr22	18369799	18371306
chr5	38033169	38033738		chr23	20420735	20423239		chr22	18785474	18787131
chr5	38056132	38057201		chr3	44427187	44427745		chr3	20341020	20341825
chr5	38060193	38061049		chr23	21205753	21208855		chr22	18822322	18823536
chr5	38917843	38920411		chr23	21611016	21613066		chr22	18924736	18926233
chr5	39605173	39605660		chr23	21613674	21615169		chr22	19017365	19017953
chr5	39606091	39609127		chr23	21620205	21621581		chr3	20384845	20386245
chr5	39609632	39610401		chr7	27516246	27517875		chr22	20926315	20928530
chr5	40068618	40069764		chr7	27518864	27521009		chr3	20541211	20542282
chr5	43190012	43192214		chr3	45428518	45430882		chr22	20974144	20975024
chr5	43194803	43196037		chr7	28970335	28972390		chr22	21683719	21684691
chr5	43999869	44000989		chr7	28974380	28975680		chr22	22010115	22010697
chr5	55977695	55978203		chr7	29004606	29006485		chr3	20918054	20919262
chr5	56125944	56127791		chr7	29733269	29734660		chr3	22421753	22422802
chr5	56208327	56209189		chr7	29736662	29739249		chr3	22594918	22595917
chr5	56214595	56216224		chr7	29739778	29741304		chr3	22681633	22683293
chr5	56481277	56483332		chr7	29741530	29743368		chr3	22691604	22692841
chr5	57791151	57791693		chr7	31872307	31874460		chr3	22886690	22887505
chr5	58982997	58985725		chr23	22213821	22215984		chr3	23750258	23752138
chr5	60185635	60188658		chr23	22225087	22226181		chr3	23895548	23896994
chr5	60222051	60222604		chr23	22227148	22228609		chr3	24338638	24339639
chr5	62787623	62788786		chr23	22237487	22239141		chr3	24727153	24728774
chr5	64082440	64084804		chr23	22271223	22271859		chr3	25545461	25546652
chr5	64093175	64094267		chr23	22351804	22352691		chr22	22879550	22880162
chr5	64094376	64094857		chr23	22572794	22574529		chr22	22886969	22888248
chr5	64097233	64098384		chr23	22581357	22583197		chr22	23695509	23697353
chr8	17259864	17262214		chr23	22615160	22617336		chr22	24131857	24132915
chr5	67698067	67699494		chr23	22736330	22737231		chr3	26625694	26626446
chr5	67700765	67701348		chr23	22769145	22770620		chr3	27297731	27299084
chr5	72101037	72102081		chr5	35301315	35302737		chr3	27542800	27544427
chr5	73481755	73482765		chr23	22779710	22780667		chr22	26290982	26293286
chr4	2487395	2488856		chr23	22781949	22785086		chr3	27720016	27721331
chr4	3228849	3229784		chr23	22787368	22789555		chr22	26772739	26774020
chr4	3235647	3236731		chr23	22790878	22793784		chr22	26782567	26784153
chr4	3240514	3242229		chr23	22843247	22844493		chr22	26800698	26801683
chr4	3244858	3245803		chr23	22848868	22851164		chr22	26971847	26972752
chr7	36326024	36326821		chr23	22859842	22860584		chr3	28413343	28414010
chr7	36328467	36329904		chr23	23022446	23024058		chr3	28604980	28605889
chr4	3643322	3644332		chr23	23024408	23026103		chr3	28820046	28822241
chr4	3681762	3682338		chr5	37550727	37553616		chr3	29314118	29315225
chr7	36899099	36899949		chr3	46352436	46354193		chr3	29757836	29758708
chr23	23564451	23565307		chr7	33718332	33721110		chr3	30026565	30027792
chr4	8348370	8351107		chr7	33839844	33841444		chr22	27434756	27435740
chr4	8600618	8602180		chr7	33843294	33844817		chr3	30250497	30251518
chr4	11596855	11597446		chr5	38162327	38164551		chr3	30480875	30481422
chr4	13398111	13398748		chr5	38346051	38346891		chr22	27440048	27441328
chr4	13405114	13406168		chr5	38347757	38349258		chr7	22361017	22362136
chr4	13678820	13682245		chr5	39455497	39457211		chr3	30806823	30807331
chr4	13687159	13688399		chr5	39748998	39750843		chr3	31114874	31116121
chr4	15030889	15031424		chr5	39752547	39753796		chr22	27479823	27480387
chr4	19219427	19220156		chr5	39755625	39757865		chr22	27481664	27483159
chr4	20577195	20578935		chr5	41028313	41029936		chr3	31726340	31727314
chr4	20580262	20580871		chr5	41185696	41187248		chr22	32017382	32019265
chr4	20582783	20583484		chr5	42717598	42719095		chr22	32280880	32281722
chr4	21850417	21851613		chr5	47462608	47464020		chr22	32355499	32357902
chr4	21852891	21854013		chr5	49107107	49108534		chr7	23606283	23607074
chr4	22655938	22659870		chr5	50412928	50415498		chr22	32825144	32826450
chr4	22825648	22828521		chr5	50416103	50418738		chr7	23633570	23635166
chr4	24338451	24339248		chr5	50583153	50585042		chr7	23885830	23886775
chr4	25529450	25531143		chr5	50609341	50611134		chr7	24273769	24274159
chr4	31739226	31740532		chr5	50630237	50634015		chr7	24345401	24347483
chr4	31822440	31823397		chr5	50672617	50674692		chr7	24374148	24374873
chr4	31826068	31827001		chr5	50692339	50693647		chr22	34555560	34556634
chr4	31831340	31831965		chr5	50695595	50697372		chr22	34629387	34630110
chr13	35526150	35531629		chr5	50705598	50706823		chr7	24838533	24839381
chr18	33481457	33482358		chr5	50792900	50793798		chr7	25045185	25045826
chr18	33482812	33483458		chr5	51624048	51626432		chr3	31967747	31969395
chr13	36298717	36300214		chr5	52938915	52941291		chr3	31972549	31973806
chr13	37116054	37116637		chr5	52952877	52954665		chr3	32477881	32478885
chr13	37120997	37121722		chr5	52954812	52955409		chr3	32521189	32521860
chr13	37121782	37123148		chr5	52963133	52964287		chr3	32630950	32631817
chr18	33770867	33771924		chr5	52981850	52985221		chr7	25313783	25314370
chr13	37433555	37434069		chr5	61239620	61241489		chr3	32981036	32981649
chr13	37434818	37436057		chr5	61242521	61244288		chr3	33063017	33063959
chr13	39810602	39812514		chr5	61268440	61270731		chr3	33696053	33696747
chr13	42227894	42228618		chr5	61359874	61361388		chr7	25347564	25349785
chr13	42709303	42712010		chr5	61364311	61365353		chr3	34375005	34376775
chr13	45138855	45139964		chr5	61365600	61367371		chr22	34979718	34980585
chr18	35725129	35726269		chr5	66285446	66286336		chr3	35232090	35233015
chr18	35726443	35727322		chr5	66287249	66289941		chr22	35563028	35563847
chr18	35741569	35743234		chr5	68181106	68182878		chr22	35569255	35570266
chr14	1509627	1510007		chr8	17605158	17607645		chr3	35451007	35451532
chr14	5746423	5746978		chr7	33908249	33909075		chr3	36026701	36028151
chr14	5829551	5832130		chr7	33922625	33923575		chr3	36028495	36029964
chr18	40147615	40150173		chr7	34171604	34173694		chr3	36745865	36746372
chr18	40152780	40153491		chr7	34352667	34355253		chr22	35578307	35579110
chr18	40415135	40415980		chr7	35088555	35091447		chr22	35608830	35609882
chr18	40416512	40417702		chr7	35809353	35811280		chr22	35641376	35642193
chr21	26438904	26440443		chr7	36181987	36184060		chr22	36526493	36527461
chr21	28644567	28648287		chr7	36191466	36192751		chr3	38843022	38843870
chr14	11119108	11123332		chr7	36224947	36226459		chr22	36836946	36838370
chr14	12549408	12550355		chr7	36228184	36230147		chr3	39199839	39201084
chr14	13824870	13826461		chr7	36231751	36234215		chr22	37055645	37056174
chr14	13826652	13827964		chr7	36236535	36237109		chr22	37155889	37156546
chr14	15950243	15950808		chr7	36285299	36286558		chr22	37243078	37243970
chr14	17088593	17090169		chr4	4912166	4913420		chr22	37638222	37638683
chr21	37559109	37560197		chr23	23133937	23135401		chr22	37641272	37641843
chr14	19992062	19993081		chr23	23152751	23154216		chr22	37643713	37644735
chr14	20270677	20271470		chr23	23154591	23156606		chr22	38334037	38334580
chr21	38200542	38203171		chr23	24054589	24055068		chr22	38614586	38616219
chr21	38545993	38546563		chr23	24111007	24111859		chr22	38673478	38674414
chr14	20884133	20884728		chr4	8047716	8049947		chr22	39182498	39183909
chr14	20884898	20885485		chr4	8097455	8101774		chr22	39233983	39235762
chr14	23902055	23903565		chr4	9565249	9566137		chr22	39295274	39296010
chr20	6635190	6636120		chr4	10869646	10870863		chr22	39298246	39300213
chr20	7282719	7283716		chr4	10886015	10886680		chr22	39371291	39372162
chr20	7367186	7372208		chr4	12216593	12218272		chr23	157526	158232
chr20	12068259	12068779		chr4	12425179	12426724		chr23	758819	759526
chr20	14824441	14825004		chr4	12447570	12449855		chr23	1554347	1554954
chr20	19238590	19239393		chr4	12473348	12474187		chr23	3079329	3079916
chr20	19293988	19296672		chr4	13554379	13556833		chr23	3513357	3514318
chr20	20813440	20816460		chr4	14844115	14845671		chr23	4171241	4172383
chr20	20860566	20863046		chr4	14849043	14850582		chr23	4251074	4253460
chr20	22814138	22815519		chr4	14851250	14852543		chr23	4253952	4255158
chr20	23552162	23552674		chr4	16876968	16877914		chr23	4590890	4591988
chr20	23859335	23861389		chr4	16897590	16898349		chr23	4630485	4631515
chr20	27730992	27734284		chr4	16966815	16967949		chr23	4694323	4695524
chr20	28329218	28331738		chr4	18500382	18501428		chr3	40421093	40421846
chr20	31365984	31366882		chr4	19320777	19324144		chr23	5937973	5939164
chr20	31425408	31427281		chr4	21364819	21366399		chr3	40559579	40560106
chr20	33223899	33225497		chr4	22302637	22305260		chr3	40564862	40565619
chr20	33324890	33327600		chr4	22305453	22307648		chr3	40596054	40597528
chr20	33996978	33999613		chr4	23979571	23980761		chr3	40716828	40718515
chr20	37109208	37111603		chr18	28993746	28994918		chr3	40937423	40937982
chr20	38892595	38895488		chr18	28996006	28998262		chr23	7308824	7309628
chr20	38962127	38963334		chr18	28998462	29001678		chr23	7431413	7432355
chr20	41211862	41214062		chr18	29002271	29004624		chr23	7644689	7647094
chr20	41229444	41230199		chr18	29012459	29013106		chr23	8046093	8046794
chr20	49635416	49636641		chr18	29067424	29069606		chr3	42617339	42617724
chr20	49636761	49637662		chr18	29121257	29124096		chr3	42662637	42663172
chr10	9137761	9138763		chr13	35258061	35260288		chr23	8047478	8048333
chr10	9561852	9565619		chr13	35261504	35264227		chr23	8345652	8346061
chr10	10889290	10892452		chr13	35280065	35281313		chr23	8436150	8436908
chr10	12260067	12261579		chr13	35283127	35286812		chr3	43031677	43033109
chr10	15887528	15889312		chr13	35287693	35289144		chr3	43034330	43036788
chr10	15889776	15890651		chr13	35292121	35293506		chr3	43258847	43259933
chr10	16522872	16523660		chr13	35355375	35356817		chr23	8643256	8644193
chr10	16524790	16526178		chr13	35360103	35362883		chr3	43734544	43734955
chr10	17286564	17287118		chr13	36939673	36940241		chr23	8668246	8669166
chr10	17290463	17293216		chr18	33691018	33694804		chr23	8786836	8787618
chr10	19243215	19247843		chr13	37386911	37388003		chr3	43856645	43857139
chr10	20371221	20372527		chr18	34375681	34377470		chr23	9209594	9210540
chr10	21441121	21444898		chr14	6320099	6320788		chr23	9297678	9299009
chr10	24452738	24453770		chr14	8234841	8235425		chr23	9318128	9319052
chr10	24759874	24762138		chr14	8313923	8314659		chr23	10440830	10441404
chr10	27915352	27916646		chr14	8316114	8318656		chr23	11419491	11421621
chr10	28632948	28633525		chr14	8321431	8322823		chr7	25683566	25685734
chr10	28642744	28645089		chr21	26789401	26792267		chr23	13939629	13940471
chr10	29418970	29420442		chr21	26792403	26794323		chr23	14201719	14203850
chr10	30278277	30279055		chr21	31101855	31104154		chr23	14705430	14706540
chr10	30279224	30279769		chr21	31104306	31109040		chr23	14728256	14729048
chr10	32021497	32022341		chr14	9664645	9666258		chr7	25807563	25808446
chr10	34414046	34416553		chr21	31203294	31205372		chr23	14794710	14796066
chr10	35876863	35877418		chr21	31207485	31209313		chr23	16303936	16304414
chr10	38121435	38122041		chr14	13290125	13291188		chr23	16579906	16581129
chrZV8_NA6114	30913	33033		chr21	34112364	34115525		chr23	16643772	16645052
chrZV8_NA4261	23422	23943		chr14	16106021	16108778		chr7	26721281	26722227
chrZV8_NA4489	29253	30439		chr14	16110121	16111174		chr7	27193372	27195071
chrZV8_NA2641	53031	55746		chr14	16111259	16113550		chr7	27314235	27315781
chr7	38450294	38452151		chr14	22354613	22355569		chr23	16713982	16715475
chr7	39011549	39013893		chr14	22445241	22446787		chr23	17051741	17052279
chrZV8_SCAFFOLD2972	16512	17082		chr14	24822207	24822749		chr23	17597658	17598230
chrZV8_SCAFFOLD2972	20709	23290		chr21	39317670	39319381		chr23	18235320	18237702
chrZV8_NA7693	10475	11402		chr21	39322115	39324123		chr3	43895445	43896768
chrZV8_NA5623	7491	8551		chr14	26027696	26030290		chr23	19323668	19324774
chrZV8_NA10766	14413	15516		chr14	26055740	26057615		chr23	19556784	19557367
chrZV8_NA160	90559	92039		chr14	26058206	26059462		chr23	20403048	20404569
chrZV8_NA3215	15572	18042		chr14	26062697	26063877		chr3	44274573	44275852
chrZV8_NA2930	78685	79925		chr14	26101593	26103139		chr23	20447756	20448856
chrZV8_NA2733	90216	92701		chr14	26114509	26118231		chr23	20459562	20460388
chrZV8_NA9839	38279	39579		chr21	39338014	39344808		chr3	44773938	44774569
chrZV8_NA3752	33183	36293		chr21	39347033	39348781		chr7	27499459	27500680
chrZV8_NA3665	5061	7392		chr21	40166896	40169042		chr7	27506011	27507879
chrZV8_NA3163	18548	18924		chr20	4002529	4005058		chr7	27510235	27511125
chrZV8_NA3984	103367	105389		chr20	9154516	9156056		chr3	45055242	45057930
chrZV8_NA4006	48527	50564		chr20	9168531	9169562		chr3	45091158	45092112
chrZV8_SCAFFOLD3011	31619	35451		chr20	13366619	13367123		chr7	27527905	27529171
chrZV8_NA9565	9392	11045		chr20	19645952	19648443		chr3	45628691	45629209
chrZV8_SCAFFOLD3025	230772	231286		chr20	20482757	20484978		chr7	27593007	27594183
chrZV8_SCAFFOLD3025	578503	579235		chr20	20486540	20489031		chr3	45878403	45879579
chrZV8_SCAFFOLD3025	580409	581223		chr20	20607187	20610038		chr7	27595751	27596323
chrZV8_SCAFFOLD3021	246092	248238		chr20	20635389	20636817		chr3	46115876	46117146
chrZV8_SCAFFOLD3028	17928	19271		chr20	20657251	20658889		chr7	27762277	27763911
chrZV8_SCAFFOLD3028	106974	108177		chr20	20660525	20662148		chr7	27957505	27959407
chrZV8_SCAFFOLD3028	137303	138335		chr20	20664417	20666383		chr7	28449792	28450746
chrZV8_SCAFFOLD3028	444238	445130		chr20	24583724	24585763		chr7	28667874	28669503
chrZV8_SCAFFOLD3028	447057	450611		chr20	26103132	26105476		chr7	29070424	29072668
chrZV8_NA4212	89360	90023		chr20	26127980	26128650		chr7	29073945	29074742
chrZV8_NA7513	72073	76266		chr20	26161118	26162429		chr7	29076639	29077600
chrZV8_NA3883	116502	117017		chr20	26605034	26605860		chr7	29095134	29095687
chr8	17790574	17791260		chr20	26757509	26759240		chr7	29184123	29185088
chr8	17800337	17802360		chr20	27856234	27857922		chr7	29383797	29384422
chr8	18940448	18945280		chr20	28379524	28381886		chr3	46326220	46327980
chr8	18946083	18946816		chr20	28475998	28476500		chr3	46330802	46331453
chr8	18948027	18948808		chr20	29666938	29668495		chr3	46335423	46336413
chr8	19155115	19156472		chr20	29672428	29677083		chr7	29752121	29753564
chr8	22526576	22527934		chr20	29680061	29681246		chr7	30699858	30700480
chr8	24713398	24714127		chr20	29681670	29682229		chr7	30758129	30759240
chr8	24714909	24716896		chr20	29683684	29685853		chr7	30776419	30777152
chr8	24719060	24719656		chr20	29687472	29689303		chr7	30781353	30782023
chr8	25039199	25040446		chr20	29690931	29692842		chr7	31136980	31137703
chr8	25906385	25908603		chr20	29862452	29863941		chr7	31209626	31210750
chr8	27589695	27595730		chr20	29900616	29902767		chr7	31678587	31680855
chr8	27605760	27607053		chr20	30496219	30498313		chr7	31786116	31786653
chr8	27607920	27610864		chr20	30537781	30538830		chr7	31844228	31845116
chr8	27702572	27706895		chr20	30540161	30541078		chr23	21628125	21629617
chr8	29959480	29960427		chr20	30541548	30542905		chr7	32528032	32529240
chr8	31841405	31843674		chr20	30543832	30545676		chr5	33751249	33752391
chr8	32101644	32102356		chr20	31177801	31179681		chr23	22002620	22004477
chr8	39198030	39198669		chr20	32230379	32232037		chr23	22232077	22232843
chr8	46447881	46448704		chr20	33336201	33337871		chr23	22310851	22312295
chr8	52204201	52205462		chr20	33366490	33367906		chr5	34165819	34166519
chr8	52672259	52676723		chr20	33368596	33371105		chr5	34611352	34611923
chr8	52678351	52678844		chr20	33378930	33380373		chr5	34786365	34787740
chr8	52701801	52703856		chr20	33766965	33769257		chr5	35228899	35230061
chr8	52704567	52706349		chr20	34249898	34250905		chr5	35236511	35237287
chr8	52746936	52747522		chr20	34329965	34333295		chr23	22772864	22774414
chr8	54229449	54230450		chr20	34334770	34336030		chr5	35654059	35655160
chr19	3198595	3204204		chr20	35135389	35136001		chr23	22812047	22813316
chr19	3279336	3279844		chr20	36461788	36463191		chr23	22815219	22816149
chr19	4812343	4813670		chr20	36869673	36872345		chr23	22818859	22819450
chr19	6759277	6760505		chr20	37477753	37479117		chr23	22836613	22837694
chr19	7145752	7151556		chr20	39582186	39583835		chr5	36405405	36405981
chr19	7242578	7243838		chr20	39584905	39585996		chr23	22857108	22857930
chr19	10086096	10086892		chrZV8_NA8792	116688	117780		chr23	23015281	23017831
chr19	11118460	11119210		chrZV8_NA9002	115588	118674		chr5	36806752	36807373
chr19	11119986	11121832		chr10	4101812	4104750		chr23	23035549	23036482
chr19	11123599	11125051		chr10	4106788	4108461		chr5	37043049	37043750
chr19	11802215	11804822		chr10	4110428	4111743		chr7	32813622	32814901
chr19	13791550	13792709		chr10	10152801	10155014		chr3	46340443	46341168
chr19	15804250	15805061		chr10	13645122	13645659		chr7	33120647	33122008
chr19	15874237	15875152		chr10	13657580	13659422		chr3	46579578	46581001
chr19	15876792	15877909		chr10	13675642	13677569		chr7	33815911	33817254
chr19	18959250	18959891		chr10	16997555	17000104		chr3	46854792	46856779
chr19	18959913	18960403		chr10	20086559	20089635		chr5	37568836	37569956
chr19	20340864	20343971		chr10	22626773	22628594		chr5	37570642	37572062
chr19	21357904	21358403		chr10	22630403	22632959		chr5	37977880	37979251
chr19	21392510	21394716		chr10	22758189	22760300		chr3	46903031	46903489
chr19	23583088	23584011		chr10	22889329	22891077		chr5	38335605	38336639
chr19	24853538	24855644		chr10	26436376	26437921		chr5	38350883	38352304
chr19	24882565	24883935		chr10	26439361	26441268		chr5	38372092	38373333
chr19	25039964	25041235		chr10	26443587	26445866		chr5	38415937	38416896
chr19	25043718	25046169		chr10	26447031	26447899		chr5	38425308	38426210
chr19	26850067	26851610		chr10	29611121	29613098		chr5	39032513	39034061
chr19	28703860	28705241		chr10	31762847	31763618		chr5	39060764	39061753
chr19	30989273	30991044		chr10	34888523	34890872		chr5	39169103	39169949
chr19	32371291	32373444		chrZV8_NA4561	88840	91793		chr5	39454326	39454890
chr19	32774374	32776939		chr7	37721342	37723268		chr5	39476273	39476837
chr19	33488280	33490112		chr7	37776219	37777553		chr5	39725492	39726336
chr19	34269870	34270754		chr7	38036072	38038452		chr5	39746200	39747397
chr19	36052452	36053153		chrZV8_SCAFFOLD2998	13401	15879		chr5	39760210	39761128
chr19	36083202	36084502		chr7	39313775	39314806		chr5	39774503	39775496
chr19	37275901	37278585		chr7	39316748	39318228		chr5	39811570	39812889
chr19	37339276	37342259		chr7	39318314	39318857		chr5	40245794	40246921
chr19	37750891	37754282		chr7	39318939	39321027		chr5	40283233	40284056
chr19	42210119	42213817		chrZV8_NA4181	77556	79495		chr5	40471710	40472489
chr19	42880940	42882037		chrZV8_NA4666	103492	104817		chr3	48375494	48376501
chr19	43115812	43116766		chrZV8_NA3610	49817	50908		chr3	48453904	48454574
chr17	9883935	9884681		chrZV8_NA3126	130325	134285		chr3	49065782	49066459
chr17	9886084	9886730		chrZV8_NA3126	153336	154769		chr3	51108510	51109976
chr17	9894073	9895149		chrZV8_NA5218	20763	23148		chr3	51144369	51145533
chr17	11898208	11899513		chrZV8_NA5209	51040	53030		chr5	41189257	41190430
chr17	11913267	11915099		chrZV8_NA5209	53962	55330		chr5	41307443	41308660
chr17	17308764	17310316		chrZV8_NA1715	34658	35833		chr5	42584766	42585720
chr17	17894599	17904118		chrZV8_NA7823	129691	131200		chr5	42648286	42649125
chr17	17904778	17906081		chrZV8_NA1016	109849	110230		chr5	42736835	42737491
chr17	18844888	18845510		chrZV8_NA1016	110556	111503		chr5	43416161	43417297
chr17	19283195	19287124		chrZV8_NA1016	113606	115188		chr5	43940142	43942067
chr17	19320893	19323276		chrZV8_NA1016	120008	121680		chr5	45600764	45601270
chr17	19326358	19327447		chrZV8_SCAFFOLD3029	278481	279632		chr5	47001182	47002013
chr17	20170112	20171737		chrZV8_SCAFFOLD3029	282003	283464		chr5	48613599	48614530
chr17	21104202	21106850		chrZV8_SCAFFOLD3029	302328	303468		chr5	48645918	48647003
chr17	24121320	24123497		chrZV8_NA3883	83071	86579		chr5	48650949	48652582
chr17	24138722	24139338		chrZV8_NA3883	88896	89460		chr5	49250696	49252028
chr17	24140711	24142472		chr8	19511780	19513710		chr5	50180038	50180719
chr17	24142892	24143970		chr8	19937281	19938688		chr5	50227483	50228094
chr17	24146120	24147213		chr8	19944718	19946416		chr5	50532368	50533390
chr17	24854480	24854992		chr8	26315938	26317523		chr5	50543262	50544648
chr17	25359314	25361412		chr8	26319013	26320113		chr5	50567401	50569119
chr17	25362414	25363065		chr8	26755117	26756939		chr5	50597486	50599233
chr17	26696628	26700678		chr8	26758228	26760538		chr5	50602778	50604187
chr17	27083036	27084233		chr8	29289879	29291507		chr5	50625106	50625848
chr17	27857123	27860189		chr8	34052418	34054211		chr5	50626878	50627946
chr17	28266865	28270342		chr8	51847217	51850012		chr5	50825588	50826995
chr17	28744813	28745603		chr19	5991287	5993105		chr5	50853862	50854764
chr17	30809742	30810466		chr19	8174994	8181572		chr5	50911118	50912259
chr17	30812895	30814255		chr19	8630444	8631604		chr5	50976751	50978187
chr17	30814323	30815824		chr19	12403838	12406707		chr5	51336595	51338144
chr17	30815868	30816444		chr19	12408502	12409888		chr5	51463961	51464780
chr17	33307039	33308257		chr19	18493985	18494531		chr5	52110228	52111302
chr17	33308741	33309821		chr19	24734564	24736865		chr5	52141266	52142200
chr17	33311251	33312074		chr19	24743627	24745371		chr5	52932646	52933395
chr17	33348145	33351963		chr19	29666983	29668776		chr5	55822081	55823466
chr17	34735559	34737758		chr19	29671801	29674610		chr5	56479982	56480731
chr17	36068210	36069435		chr19	29721304	29722707		chr5	57359985	57361308
chr17	37397748	37398515		chr19	29723499	29725074		chr5	60163257	60163793
chr17	43288184	43289636		chr19	29781441	29784866		chr5	60331872	60333774
chr17	44277968	44278766		chr19	34542131	34545104		chr5	60371746	60372298
chr17	44558993	44561553		chr19	34604683	34605775		chr5	61043626	61045030
chr17	44561698	44562435		chr19	43681063	43684319		chr5	61246522	61247079
chr17	44563913	44564772		chr19	46151416	46152149		chr5	61349383	61350668
chr17	44566090	44567087		chr17	8836839	8838850		chr5	61939702	61940844
chr17	44627371	44630514		chr17	12460427	12462849		chr5	62517330	62518266
chr18	1744231	1745176		chr17	12487017	12488200		chr5	63131879	63132539
chr18	3090005	3091191		chr17	14180603	14182104		chr5	63251473	63252183
chr18	6548216	6549241		chr17	14184763	14186757		chr5	64103134	64103894
chr18	7312802	7314730		chr17	14379330	14381390		chr5	64208247	64209918
chr18	11303449	11306078		chr17	14381873	14384017		chr5	65591822	65592739
chr18	11318302	11320905		chr17	14406963	14410222		chr5	65593186	65593759
chr18	14550145	14551914		chr17	18344525	18345150		chr5	65839060	65839517
chr18	15280588	15281695		chr17	18352230	18354024		chr5	65839780	65840603
chr7	41120526	41123852		chr17	18354579	18356248		chr5	66688084	66688627
chr7	41233062	41235443		chr17	18360733	18361627		chr5	67485310	67486348
chr7	41393420	41395479		chr17	18363739	18367220		chr5	68124872	68126416
chr7	41398475	41399680		chr17	18592068	18593710		chr5	68176287	68177368
chr7	41678167	41679396		chr17	19014401	19016474		chr5	68200551	68201512
chr7	41682660	41683453		chr17	21825136	21825808		chr5	68204977	68205687
chr7	41699672	41700201		chr17	22003454	22005413		chr5	68218813	68219935
chr7	41701108	41702234		chr17	22020097	22022310		chr5	69268482	69268997
chr7	42380656	42381271		chr17	22103549	22104421		chr5	69269634	69271112
chr7	42382835	42384225		chr17	23266101	23267440		chr5	70604446	70605143
chr7	42384287	42386471		chr17	24706959	24707521		chr8	17559531	17560588
chr7	42783499	42784137		chr17	24752060	24757750		chr5	72165464	72167095
chr7	42800301	42800976		chr17	27529261	27532248		chr5	72331035	72331577
chr7	42854990	42857989		chr17	27532277	27533482		chr5	73039044	73040436
chr7	42998165	42999582		chr17	27545496	27546265		chr5	74374715	74375400
chr7	43011953	43012825		chr17	30960270	30961396		chr5	74375408	74376652
chr7	44058229	44064009		chr17	30961923	30963455		chrZV8_SCAFFOLD3117	6697	7453
chr7	44076949	44079941		chr17	30965031	30966238		chr4	1306927	1307693
chr18	20117827	20119639		chr17	30967632	30968759		chr4	1631911	1633744
chr7	45289099	45289651		chr17	30971604	30973837		chr4	1812762	1813486
chr7	46486470	46487408		chr17	30975143	30976196		chr4	1894981	1895817
chr7	46487781	46488268		chr17	30977857	30981012		chr4	2043678	2045169
chr7	46492683	46493846		chr17	30983418	30986071		chr4	2881417	2883017
chr7	46496578	46497067		chr17	32337944	32339647		chr8	17564695	17565610
chr18	22630989	22634074		chr17	33863749	33866479		chr8	17579602	17580874
chr18	22634431	22636725		chr17	33903522	33905712		chr7	33845964	33846910
chr7	48342749	48344551		chr17	35466826	35467884		chr4	3247255	3248650
chr7	48346895	48349944		chr17	35481056	35482818		chr7	33884965	33885772
chr18	23647080	23647696		chr17	35490248	35491949		chr4	3300830	3301798
chr18	23647720	23648204		chr17	35493981	35495379		chr7	33920253	33921008
chr18	23655094	23656701		chr17	35514872	35516055		chr7	34027763	34029072
chr7	50032990	50034350		chr17	35518345	35520020		chr7	34099286	34100029
chr7	50241135	50242531		chr17	35522883	35524612		chr7	34110431	34111419
chr7	50302595	50304318		chr17	35525803	35528464		chr7	34320545	34321714
chr7	53478794	53480789		chr17	35528839	35532154		chr7	34372107	34373440
chr7	58027186	58027797		chr17	35534160	35536289		chr7	34458604	34459890
chr7	58035520	58037516		chr17	35536483	35539115		chr7	34549789	34551465
chr7	58925910	58926618		chr17	35539603	35541274		chr7	34667919	34668783
chr7	63322678	63324107		chr17	35542059	35543709		chr7	34899649	34900920
chr7	63330563	63331458		chr17	35570702	35571565		chr7	34941224	34941703
chr7	68731322	68733677		chr17	35641024	35642320		chr7	35077504	35078611
chr6	1561616	1563605		chr17	35643721	35645114		chr7	36072922	36073497
chr6	5701093	5702024		chr17	35659637	35660879		chr7	36279717	36280847
chr6	7698035	7700956		chr17	35713184	35714914		chr4	3382425	3383880
chr6	9208791	9209334		chr17	41209609	41212795		chr7	36348559	36349320
chr6	10766672	10767460		chr17	41212988	41214216		chr4	4549482	4550153
chr6	10767572	10768196		chr17	43774140	43775602		chr4	4736973	4737713
chr6	11749179	11750185		chr17	48810489	48811831		chr7	37437843	37438500
chr6	11751040	11753254		chr17	48811919	48814138		chr4	4830804	4832007
chr6	12724428	12726816		chr17	48814366	48815039		chr7	37445204	37446482
chr6	14892642	14895357		chr17	48818248	48821187		chr4	4928016	4929400
chr6	14957907	14961230		chr17	49339734	49342144		chr4	5178918	5179644
chr6	18771482	18773571		chr17	49342822	49343500		chr4	5571130	5572272
chr6	20423468	20425013		chr18	73214	74839		chr4	6337451	6338796
chr6	20439125	20440907		chr18	82491	83137		chr4	6357222	6358370
chr6	20442502	20446119		chr18	11617632	11619271		chr4	7182634	7184247
chr6	20636196	20637503		chr18	12974702	12976308		chr4	7185090	7186052
chr6	20752319	20753695		chr18	18167759	18170577		chr4	7187156	7188357
chr6	20754217	20755085		chr18	18189777	18191606		chr4	7519576	7520858
chr6	23644817	23646767		chr18	18192011	18200344		chr23	23045055	23046061
chr6	23646863	23648546		chr18	18201032	18206508		chr4	7528553	7529278
chr6	23876136	23876734		chr18	18209329	18210267		chr23	23095091	23095621
chr6	25562680	25563620		chr18	18212080	18214368		chr23	23119431	23120622
chr6	27811265	27812590		chr18	18215606	18216415		chr23	23129697	23130845
chr6	32747960	32750413		chr18	18216551	18218632		chr23	23137412	23138188
chr6	33550390	33551471		chr18	18226852	18228844		chr23	23174781	23175850
chr6	34090075	34091977		chr18	18237001	18239067		chr23	23249783	23250336
chr6	34580117	34585410		chr18	18245748	18247594		chr23	23283905	23284981
chr6	34585931	34587008		chr18	18247875	18249588		chr23	23689593	23690049
chr6	34606998	34608380		chr18	18250792	18252865		chr23	23816515	23818338
chr6	34612636	34613209		chr7	40963858	40964853		chr23	24180730	24181769
chr6	34970808	34974187		chr7	42480995	42483187		chr4	7673604	7674242
chr6	35470393	35472854		chr18	18264586	18265279		chr4	7690962	7691949
chr6	36525615	36528108		chr18	18266012	18267399		chr4	7744667	7745500
chr6	36530193	36532311		chr18	18268718	18274307		chr4	8029893	8030629
chr6	40243716	40245687		chr18	18277191	18278977		chr4	8030672	8032627
chr6	41671992	41673933		chr18	18292025	18294600		chr4	8040603	8041836
chr6	42045217	42048428		chr18	18312414	18313183		chr4	8043807	8044447
chr6	43189970	43192895		chr7	43498161	43499635		chr4	8160564	8162136
chr6	46662620	46664003		chr18	19869603	19871901		chr4	8168276	8169167
chr6	51834301	51835737		chr7	43500240	43503104		chr4	8179097	8179679
chr6	54316325	54316898		chr18	20042671	20044778		chr4	8196758	8197279
chr6	54426451	54427200		chr18	20055115	20057105		chr4	8250393	8251810
chr6	54854095	54854978		chr14	28381953	28384492		chr4	8344837	8345529
chr6	54854986	54855528		chr14	28386733	28387209		chr4	8360146	8361275
chr6	54858605	54860764		chr14	28426015	28427026		chr4	8365204	8366846
chr6	54936124	54938651		chr14	28482016	28484457		chr4	8917531	8918065
chr6	56646471	56647131		chr18	20699259	20700457		chr4	9578703	9579558
chr6	56722081	56724004		chr18	20708207	20709945		chr4	10288213	10289154
chr6	60186559	60187046		chr18	20735789	20737563		chr4	10812339	10813148
chr6	60187152	60187904		chr18	20739535	20742868		chr4	10835346	10836843
chr5	11220188	11221738		chr18	20744305	20745886		chr4	10890778	10892512
chr5	15813372	15817592		chr18	20748379	20749713		chr4	10923086	10924269
chr5	16751304	16752253		chr18	20752478	20753625		chr4	11032649	11034459
chr5	16753365	16754090		chr7	46977673	46978415		chr4	11175995	11176692
chr5	18020988	18023631		chr18	21311366	21313382		chr4	11358152	11359352
chr5	20344810	20348112		chr7	47001656	47005477		chr4	11736853	11737657
chr5	21078644	21081109		chr7	47007228	47008758		chr4	12476766	12477646
chr5	23742235	23743266		chr18	22985573	22986954		chr4	12544269	12545734
chr5	25354041	25356400		chr7	47023085	47026310		chr4	12552386	12553710
chr5	27337150	27340587		chr7	47305268	47306459		chr4	12771627	12772640
chr5	28671885	28672876		chr7	47307785	47312879		chr4	12850728	12851905
chr5	28682851	28684280		chr7	47314891	47315908		chr4	13000775	13001897
chr5	28708096	28708651		chr18	24328314	24330072		chr4	13008653	13009222
chr5	28975628	28976067		chr18	25002151	25004405		chr4	13461493	13462382
chr5	29608850	29610129		chr7	51880745	51883004		chr4	13509610	13510651
chr5	29612161	29617170		chr7	51884034	51887217		chr4	13530025	13530643
chr5	31083748	31085386		chr7	51888327	51890732		chr4	13692469	13693075
chr5	31744170	31746877		chr7	51910373	51910973		chr4	13784783	13786045
chr5	32393970	32394429		chr7	51943741	51945932		chr4	13903450	13905163
chr5	32394485	32395491		chr7	53521798	53523305		chr4	14183883	14184987
chr5	32396803	32397890		chr7	53523677	53526515		chr4	14217874	14218623
chr5	32399913	32403959		chr7	53532083	53533705		chr4	14304683	14305954
chr18	46275373	46277010		chr7	53558010	53560182		chr4	14323099	14323642
chr15	79570	81069		chr7	53561251	53562008		chr4	15037611	15038934
chr15	2668436	2668928		chr7	53564569	53566827		chr4	15120233	15122157
chr15	5299755	5302792		chr7	53570089	53572103		chr4	15125242	15126302
chr15	7290561	7291468		chr7	53603626	53604828		chr4	15146188	15146824
chr15	8285208	8288032		chr7	56377196	56379346		chr4	15166824	15167642
chr15	9748368	9751015		chr7	56917475	56919960		chr4	15206848	15207521
chr15	9753609	9754471		chr7	58804415	58805565		chr4	15321709	15322354
chr15	13804838	13806397		chr7	68823878	68826822		chr4	15584787	15586241
chr15	14050412	14052838		chr7	68828998	68830279		chr4	16020392	16021322
chr15	19601280	19602160		chr7	68843093	68845250		chr4	16894597	16895734
chr15	24862474	24864652		chr7	68846242	68847793		chr4	17054944	17056966
chr15	27186865	27190187		chr7	68889614	68890920		chr4	17359994	17360947
chr15	28812439	28814202		chr7	68893503	68895578		chr4	18345798	18346854
chr15	28814224	28815296		chr7	68901227	68902707		chr4	18541919	18543285
chr15	29166087	29167278		chr7	68906120	68907326		chr4	18725142	18725715
chr15	29336830	29340069		chr7	68909382	68910996		chr4	19229202	19229825
chr15	31020366	31021047		chr7	68915775	68917438		chr4	19336058	19336860
chr15	31022562	31025708		chr7	68944061	68945294		chr4	19714374	19715667
chr15	31030161	31030650		chr7	68947246	68948384		chr4	19732806	19734429
chr15	31036344	31041058		chr7	68950633	68951895		chr4	19772238	19772793
chr15	31042007	31043934		chr7	69445402	69447140		chr4	19777588	19778115
chr15	31045018	31045625		chr7	69472344	69474229		chr4	20102436	20103384
chr15	31046163	31047328		chr7	72144148	72145215		chr4	20470400	20472123
chr15	33803539	33804195		chr7	72147358	72149041		chr4	20472358	20474369
chr15	33805634	33806640		chr7	72177605	72179238		chr4	20616579	20617595
chr15	33809354	33810413		chr7	72186976	72189173		chr4	20617883	20621316
chr15	33823966	33825745		chr7	72198003	72203266		chr4	20638199	20638838
chr15	33831812	33832371		chr7	72210743	72212727		chr4	20880560	20881553
chr15	33832436	33833732		chr7	72231140	72232177		chr4	20895113	20895788
chr15	33834000	33834907		chr7	72232180	72237036		chr4	20902984	20904865
chr15	34334045	34334825		chr7	72240588	72241766		chr4	21021081	21021798
chr15	34599871	34601059		chr7	73262012	73264437		chr4	21050310	21051479
chr15	35037311	35039436		chr6	187673	188210		chr4	21253864	21254701
chr15	37574614	37578548		chr6	8955494	8956409		chr4	21480451	21481596
chr15	39012594	39013962		chr6	12775547	12778769		chr4	22175960	22176941
chr15	39018178	39018832		chr6	15869833	15873534		chr4	22421371	22422886
chr15	39929339	39930454		chr6	17083597	17084577		chr4	22427566	22428125
chr15	39931034	39932406		chr6	17655424	17656436		chr4	22676511	22677155
chr15	39944067	39944585		chr6	28211767	28213006		chr4	23248713	23249731
chr15	42165764	42167244		chr6	28213128	28215942		chr4	23278477	23279348
chr15	42725499	42728700		chr6	28216110	28218659		chr4	24222497	24224101
chr15	44935479	44936943		chr6	28219320	28220310		chr4	24303735	24304778
chr16	5160952	5162671		chr6	30630101	30631513		chr4	24376477	24377279
chr16	7485142	7486344		chr6	31649743	31650265		chr4	24392729	24393714
chr16	9594109	9595738		chr6	31650649	31651332		chr4	25523618	25524123
chr16	13874640	13876690		chr6	33657529	33660151		chr4	26209115	26211060
chr16	13879293	13879908		chr6	33660483	33662079		chr4	27031011	27032452
chr16	14317316	14317979		chr6	36086519	36088936		chr4	31809912	31811047
chr16	20118918	20121203		chr6	40285001	40287632		chr4	31919331	31921161
chr16	22472647	22473211		chr6	47682866	47684332		chr4	32080438	32081059
chr16	26526163	26528720		chr6	47686076	47687412		chr4	34391398	34392348
chr16	26529346	26530470		chr6	48141690	48142784		chr18	29033389	29033860
chr16	27466604	27470457		chr6	48425482	48427315		chr18	29040026	29040999
chr16	29311939	29312666		chr6	48438349	48440409		chr4	34392524	34393012
chr16	29435073	29436373		chr6	48495916	48496521		chr18	29798419	29800414
chr16	29443801	29444252		chr6	51573364	51574406		chr18	29921710	29923127
chr16	32007763	32009505		chr6	54332551	54334048		chr18	31941889	31942922
chr16	32497272	32498139		chr6	54361506	54363758		chr18	31959584	31961042
chr16	33725003	33726460		chr6	54537299	54537785		chr18	32202868	32203807
chr16	37070058	37072970		chr5	6732510	6736061		chr18	33070317	33071298
chr16	37776350	37777364		chr5	10562742	10564582		chr13	35237903	35238435
chr16	38024249	38025020		chr5	12344517	12346903		chr13	35241171	35242533
chr16	38217512	38218393		chr5	12554382	12555014		chr13	35244331	35244906
chr16	38235006	38236517		chr5	12555195	12557915		chr13	35307746	35309202
chr16	38262412	38264181		chr5	12560476	12562059		chr13	35309796	35311574
chr16	39625660	39626738		chr5	14324013	14325395		chr13	35311614	35313258
chr16	39631513	39633494		chr5	14500402	14501486		chr13	35316623	35317767
chr16	40378048	40379764		chr5	15283699	15285579		chr13	35322039	35322788
chr16	41218694	41220734		chr5	15593479	15596866		chr13	35329836	35331475
chr16	44020139	44021685		chr5	17506495	17509070		chr13	35501070	35502275
chr16	46265480	46266074		chr5	17510005	17511115		chr18	33419636	33420124
chr16	50763670	50764322		chr5	17512919	17515089		chr13	35793994	35795123
chr13	1162546	1166139		chr5	17553398	17554790		chr18	33492813	33493266
chr13	4606774	4610445		chr5	17556919	17558829		chr18	33723037	33724087
chr13	5110473	5112348		chr5	17559393	17561500		chr13	37252368	37253969
chr13	5116463	5117129		chr5	17571118	17572876		chr18	33822519	33823146
chr13	5118143	5119154		chr5	17574263	17576990		chr18	33825997	33828034
chr13	10135240	10137655		chr5	17683746	17685405		chr13	38175689	38176225
chr13	16371277	16372285		chr5	22394313	22396650		chr13	38937170	38938810
chr13	17612379	17614577		chr5	22398668	22401954		chr13	39568135	39568727
chr13	18115506	18117675		chr5	22436417	22440300		chr13	39792154	39793208
chr13	18122675	18123467		chr5	22446392	22448636		chr13	39827026	39828492
chr13	18633631	18634658		chr5	22469844	22470250		chr13	39912154	39912927
chr13	18646584	18647956		chr5	26686831	26688802		chr18	34356053	34357407
chr13	18648694	18650563		chr5	29862467	29864945		chr18	35092633	35093334
chr13	18661920	18663016		chr5	30888261	30890008		chr13	44313515	44315113
chr13	19470768	19472924		chr5	30892173	30893652		chr18	35162031	35164053
chr13	20072501	20073252		chr5	30897545	30899759		chr13	45307349	45308434
chr13	20073939	20075415		chr5	30905233	30906088		chr13	45312266	45314097
chr13	21966065	21967177		chr5	30939112	30940712		chr13	45319491	45320947
chr13	21968331	21969038		chr5	30944572	30946467		chr13	45550983	45552594
chr13	22038663	22042370		chr5	30952806	30955445		chr13	45573447	45574142
chr13	22470503	22473164		chr5	30956614	30957567		chr18	36341781	36342526
chr13	26789140	26792075		chr5	30959080	30960057		chr13	45644631	45645255
chr13	27753918	27756693		chr5	31246216	31246697		chr13	46629218	46629862
chr13	30064148	30064706		chr5	31294473	31294946		chr13	46663913	46665874
chr13	30308767	30310519		chr5	32986728	32987076		chr13	46675986	46677330
chr13	30320690	30321927		chr5	32990018	32991611		chr13	46837869	46838882
chr13	30391053	30393318		chr5	32994505	32995576		chr13	47663912	47665022
chr13	32411496	32413327		chr5	32998110	32999167		chr13	48321851	48323424
chr9	6901072	6902126		chr5	33002133	33003759		chr13	49573602	49573973
chr9	6908974	6909737		chr5	33010803	33012747		chr13	50408242	50409804
chr23	24571739	24572797		chr5	33015993	33017210		chr13	50680062	50680724
chr23	24572996	24574457		chr18	43160572	43161507		chrZV8_NA2308	49677	53042
chr23	24574468	24575252		chr18	44170771	44173566		chr14	255768	256310
chr9	8319129	8319607		chr18	49237728	49239700		chr14	1517479	1519198
chr9	8595646	8596692		chr15	4867161	4870165		chr14	1861403	1862142
chr9	9495376	9499977		chr15	11998868	12001101		chr14	2062829	2063509
chr9	9547300	9547960		chr15	13371712	13372720		chr14	3508790	3510779
chr9	10013702	10015700		chr15	14688429	14692576		chr18	36598123	36598645
chr23	25214259	25215639		chr15	14959086	14960070		chr18	36868024	36869297
chr9	11656908	11662022		chr15	14960643	14969058		chr18	37061466	37063218
chr23	28931704	28933004		chr15	14970004	14971327		chr18	37805893	37806898
chr23	34955639	34956771		chr15	14972150	14973019		chr18	38147463	38148243
chr23	35229347	35230278		chr15	16998576	17000583		chr18	38582987	38584008
chr23	35896415	35898678		chr15	17011248	17013078		chr18	38865081	38865958
chr24	5862959	5866258		chr15	17013167	17014067		chr18	38944211	38945155
chr24	9233229	9235431		chr15	17015603	17017056		chr14	6213135	6214077
chr24	10627185	10628338		chr15	17017563	17018715		chr14	6233372	6234828
chr24	12461117	12463709		chr15	20483419	20484119		chr14	6244842	6245480
chr24	13894131	13895014		chr15	20644275	20645280		chr18	39659797	39660477
chr24	16349174	16352190		chr15	21521040	21521976		chr14	6321600	6324013
chr24	16353236	16354094		chr15	21572961	21574542		chr18	39770542	39771425
chr24	16354590	16356869		chr15	21612336	21613490		chr14	6372383	6373403
chr24	16367602	16369115		chr15	22610603	22613789		chr14	6381552	6382321
chr24	16539063	16540567		chr15	22619559	22621077		chr18	39773038	39773888
chr24	16584824	16585902		chr15	24812023	24813274		chr18	40107781	40108454
chr24	17195925	17197493		chr15	24847835	24848483		chr14	7187860	7189017
chr24	18496123	18497793		chr15	25335478	25337285		chr14	7847488	7849738
chr24	22990239	22990958		chr15	25338362	25339333		chr18	40479649	40480591
chr24	24732503	24733598		chr15	27905624	27911951		chr14	7909592	7910526
chr24	24733600	24734361		chr15	28186660	28187622		chr14	8135898	8136813
chr24	25889089	25890053		chr15	29276389	29277960		chr21	25709653	25710233
chr24	33943641	33945794		chr15	29286404	29287665		chr14	8400880	8402125
chr24	38135648	38136164		chr15	29914574	29916722		chr21	25715108	25715776
chr25	4429935	4431707		chr15	29923184	29924059		chr21	25722176	25723069
chr25	4432230	4433261		chr15	30206900	30208321		chr21	25725106	25726367
chr25	5255905	5256784		chr15	30209703	30212620		chr21	26233904	26234534
chr25	9357865	9360098		chr15	30215407	30217458		chr21	26245131	26246466
chr25	9645348	9647301		chr15	30234506	30236170		chr21	26407130	26408652
chr25	10414579	10417414		chr15	33067941	33069281		chr21	26675579	26676960
chr25	11064632	11065370		chr15	35979424	35980834		chr21	26855079	26856330
chr25	11067184	11067719		chr15	39235399	39237248		chr21	26861952	26862541
chr25	13069653	13070184		chr15	39291256	39296552		chr21	26873906	26874557
chr25	15745001	15746587		chr15	39739304	39740946		chr21	27127350	27128484
chr25	20102811	20105388		chr15	39743023	39744201		chr14	8421628	8423343
chr25	21675007	21675925		chr16	450107	451638		chr21	29994522	29997242
chr25	22240796	22243349		chr16	6400330	6405227		chr14	8439342	8439840
chr25	23931165	23931918		chr16	6473838	6475615		chr14	9112491	9112996
chr25	23932909	23933525		chr16	6483802	6486053		chr21	31186180	31187744
chr25	23933564	23936021		chr16	6488370	6489507		chr14	11596285	11597250
chr25	23940871	23942134		chr16	6689079	6690461		chr14	11733306	11734447
chr25	27741651	27743030		chr16	7209172	7211586		chr21	32430904	32431945
chr25	31613605	31614329		chr16	9069624	9070482		chr21	32494709	32497068
chr18	25206707	25207244		chr16	9095849	9096919		chr21	32978891	32980131
chr18	25208778	25209978		chr16	9099161	9101514		chr21	33002085	33003375
chr18	28057919	28059670		chr16	9791233	9791952		chr14	14748859	14749926
chr18	28062027	28063660		chr16	17194255	17195350		chr21	34470370	34471132
chr18	28069760	28071826		chr16	17248295	17249668		chr21	34652028	34652761
chr18	28072654	28073831		chr16	17251761	17253786		chr21	35162815	35163734
chr14	29654177	29657080		chr16	17256591	17262530		chr14	16076812	16077903
chr14	29897795	29898349		chr16	21808494	21811902		chr14	16098681	16099486
chr14	34006931	34007446		chr16	22594608	22596398		chr21	35993154	35994120
chr14	34013715	34015962		chr16	22597712	22599379		chr14	16348356	16349643
chr14	34017798	34018900		chr16	22631970	22632984		chr21	36019063	36020726
chr3	53877811	53880396		chr16	22636700	22638159		chr14	16520035	16520851
chr14	34628600	34629132		chr16	22641091	22641580		chr21	36424848	36426563
chr14	34629578	34630217		chr16	22648087	22650178		chr14	17387780	17390138
chr2	4395201	4396257		chr16	27796828	27797688		chr21	36588675	36589675
chr2	5780705	5784780		chr16	27869373	27871310		chr21	36591248	36592267
chr2	6700412	6701351		chr16	27962606	27964072		chr14	18458837	18460230
chr2	7749503	7754792		chr16	31330669	31332271		chr14	19196753	19197230
chr2	15147429	15149110		chr16	31561903	31563511		chr21	37651696	37652953
chr2	15373640	15376165		chr16	32574178	32580548		chr14	20277943	20278525
chr2	16657447	16659071		chr16	41034424	41035840		chr21	37800340	37800952
chr2	16684486	16685930		chr16	42854368	42856229		chr14	20286472	20287225
chr2	16691763	16692595		chr16	42856918	42858212		chr14	20455563	20456692
chr2	16693746	16694592		chr16	42860883	42862415		chr14	20490494	20491794
chr2	16695746	16696249		chr16	42869736	42871881		chr21	38806409	38807871
chr2	18635336	18639493		chr13	1545025	1546679		chr21	39281020	39282310
chr2	20969621	20971641		chr13	3278329	3278736		chr14	22165874	22166448
chr2	21062083	21062821		chr13	5770994	5774520		chr21	39284578	39285814
chr2	21532824	21535397		chr13	5811874	5821681		chr14	22520546	22520980
chr2	23934714	23935509		chr13	5821751	5823598		chr21	39297869	39299176
chr2	25407187	25408600		chr13	5824638	5826302		chr14	24852311	24852791
chr2	29108692	29109552		chr13	5835343	5847190		chr14	25010219	25011330
chr2	29803321	29804764		chr13	5848679	5850048		chr14	25046933	25048921
chr2	29822520	29823059		chr13	5851004	5853199		chr14	25169650	25170176
chr2	29823229	29825854		chr13	5853489	5857217		chr14	25562057	25563788
chr2	29852514	29853567		chr13	5860203	5860809		chr14	25621217	25621599
chr2	30104484	30106746		chr13	5860986	5868990		chr14	25699587	25700491
chr2	30862045	30863281		chr13	5869815	5871504		chr14	25851446	25852085
chr2	33833637	33834406		chr13	5877638	5878592		chr21	39303507	39304917
chr2	34512116	34513515		chr13	7830881	7832596		chr21	39310024	39311163
chr2	34909425	34910162		chr13	7838876	7840655		chr14	25874380	25875166
chr2	34932155	34932698		chr13	10631296	10632932		chr21	39329902	39331408
chr2	36806334	36807367		chr13	18811927	18813228		chr21	39331583	39332698
chr2	43356628	43359638		chr13	18821218	18823076		chr21	39332897	39334031
chr2	43790161	43791479		chr13	18877430	18878937		chr14	26079463	26080842
chr2	43791552	43792143		chr13	18879082	18880084		chr14	26128286	26129250
chr2	48160306	48163419		chr13	18881403	18882336		chr14	26900879	26904028
chr2	53679142	53679707		chr13	18883661	18885004		chr14	27008747	27010028
chr2	54915362	54916760		chr13	18889473	18893498		chr14	27675438	27676103
chr1	1232513	1234907		chr13	18893637	18894162		chr21	39665915	39666850
chr1	15368127	15369491		chr13	18895815	18896444		chr21	39935618	39936554
chr1	15373263	15373900		chr13	18949926	18952042		chr21	40009555	40011053
chr1	15932013	15932815		chr13	18970968	18973166		chr21	40125334	40125859
chr1	15932993	15934674		chr13	19000130	19000569		chr21	40147813	40149239
chr1	16168349	16173569		chr13	19010729	19011362		chr21	40160465	40161846
chr1	16188390	16190063		chr13	19017301	19023351		chr21	40542697	40543862
chr1	17791577	17793228		chr13	19024231	19026407		chr21	41634000	41635200
chr1	17793285	17795505		chr13	19031184	19033377		chr21	41661134	41662392
chr1	18829299	18831067		chr13	19087422	19087964		chr21	42716003	42716582
chr1	20831536	20834585		chr13	20453308	20456066		chr21	45596087	45596915
chr1	21332588	21333199		chr13	22669507	22670862		chr21	45619787	45620778
chr1	22511268	22512166		chr13	22679237	22682247		chr21	45636473	45637992
chr1	22926835	22928316		chr13	25404252	25409062		chr21	45644245	45645134
chr1	25260587	25261285		chr13	26027030	26029288		chr21	45645983	45647518
chr1	25294260	25295882		chr13	26031362	26033001		chr21	46930524	46932030
chr1	25302470	25304916		chr13	26647102	26648238		chr21	46960498	46961134
chr1	25305230	25306257		chr13	26650105	26651652		chrZV8_SCAFFOLD3106	34922	35438
chr1	25310928	25311921		chr13	26699022	26701160		chr20	1706933	1707433
chr1	27820416	27822746		chr13	28005862	28007718		chr20	1719761	1720939
chr1	27823246	27824084		chr13	28630883	28636789		chr20	2582294	2582882
chr1	29516030	29518938		chr13	28638115	28639725		chr20	2802712	2803297
chr1	38182734	38183428		chr13	28654996	28657188		chr20	3770596	3771879
chr1	38190070	38190871		chr13	29009257	29010972		chr20	4011941	4013030
chr1	38493800	38494640		chr13	29210367	29212956		chr20	4464786	4465516
chr1	38495603	38499054		chr13	29278701	29281773		chr20	5130145	5130789
chr1	39605227	39608295		chr13	29497917	29498729		chr20	5332920	5334453
chr1	40330668	40331666		chr13	29806106	29809274		chr20	5865611	5867419
chr1	40362154	40364358		chr13	29956874	29958904		chr20	6903786	6905044
chr1	40569200	40574849		chr13	29960510	29962214		chr20	8726667	8727670
chr1	46082049	46084350		chr13	29981532	29983552		chr20	9133873	9134448
chr1	47488404	47489381		chr13	30025646	30028846		chr20	9136868	9137949
chr1	50761990	50762999		chr13	30753696	30755717		chr20	9348512	9349153
chr1	51171839	51173854		chr13	30756182	30757581		chr20	10134979	10135785
chr1	51334088	51335337		chr13	33111429	33112236		chr20	11789625	11790395
chr1	53670145	53671463		chr9	7400740	7401994		chr20	12202073	12202994
chr1	56289230	56290674		chr9	7404238	7406236		chr20	12207437	12207913
chr7	13995169	13998291		chr9	7408265	7409505		chr20	12208759	12209333
chr7	16487799	16490081		chr9	7416095	7417454		chr20	12219667	12220267
chr7	17978486	17981314		chr23	24830940	24832710		chr20	12867381	12868136
chr7	18517051	18518885		chr23	24838990	24842815		chr20	13896711	13897785
chr7	20167949	20169360		chr23	24846855	24848805		chr20	14263982	14265202
chr9	17587776	17589148		chr23	24849195	24850535		chr20	15811371	15812338
chr9	17834253	17836298		chr9	11483831	11487765		chr20	15814090	15814614
chr9	18875912	18876849		chr23	26588767	26591224		chr20	17233016	17233767
chr9	19797631	19799293		chr23	26592475	26593798		chr20	17558872	17560111
chr9	19799363	19799915		chr23	26601495	26603550		chr20	17795785	17796549
chr9	22807610	22811164		chr9	12519327	12520827		chr20	18127814	18128470
chr9	24799552	24802141		chr9	12523935	12526083		chr20	18921264	18922823
chr9	25135441	25137903		chr23	30345369	30347044		chr20	19425923	19426444
chr9	25141671	25144107		chr23	32013344	32014867		chr20	19651147	19652663
chr9	25785758	25787235		chr23	32023233	32025251		chr20	19664149	19665069
chr9	27731996	27735063		chr23	32382014	32384057		chr20	20185322	20187219
chr9	30773710	30775695		chr23	32411139	32415217		chr20	20246598	20247340
chr9	30777895	30778684		chr23	32455893	32457658		chr20	20370679	20371238
chr9	31274110	31275024		chr23	32804040	32805763		chr20	20625086	20626875
chr9	32928820	32929289		chr23	35040853	35042969		chr20	20628858	20630123
chr9	33714839	33716199		chr23	35087554	35088279		chr20	20906401	20906946
chr9	33754609	33756113		chr23	35281507	35283772		chr20	21016857	21017822
chr9	34334207	34335671		chr23	35284129	35288885		chr20	21493710	21494263
chr9	36928428	36929949		chr23	35291039	35292285		chr20	21759341	21760496
chr9	37016831	37020615		chr23	35295709	35297986		chr20	21866610	21867226
chr9	38036325	38038866		chr23	35321509	35322837		chr20	21892665	21893412
chr9	39433908	39435044		chr23	35336288	35337533		chr20	21906876	21907400
chr9	40457260	40459903		chr23	41176281	41178534		chr20	22018660	22019840
chr9	40830797	40835003		chr23	41180379	41180998		chr20	22195616	22196704
chr9	40914896	40916018		chr24	54346	55252		chr20	23559036	23560123
chr9	41645870	41647000		chr24	4158854	4159506		chr20	24378749	24379755
chr9	41906946	41910220		chr24	4231812	4233583		chr20	24433096	24433810
chr9	42350641	42354049		chr24	4793884	4795695		chr20	24564687	24565885
chr9	42355288	42359945		chr24	4798609	4800198		chr20	24618223	24619887
chr9	42960527	42961051		chr24	4801680	4803223		chr20	24662729	24663824
chr9	43148766	43149984		chr24	4939915	4940420		chr20	26275758	26276829
chr9	47263514	47264310		chr24	8488239	8490422		chr20	26358234	26359687
chr9	48506380	48507075		chr24	8491370	8492695		chr20	26363898	26365539
chr9	48512038	48514127		chr24	8505091	8506824		chr20	26385884	26386721
chr9	48516875	48517476		chr24	8508132	8509490		chr20	26599877	26600486
chr14	36533734	36535151		chr24	8514671	8515407		chr20	27517875	27518590
chr14	37235739	37238849		chr24	8978692	8979236		chr20	27594122	27594810
chr14	39210807	39212120		chr24	9476867	9478810		chr20	27802606	27803655
chr14	39216158	39217281		chr24	11616610	11618464		chr20	27949800	27950306
chr14	41413727	41414598		chr24	12554485	12555701		chr20	28279625	28280868
chr14	41415358	41418951		chr24	12756518	12758972		chr20	28969284	28969906
chr14	41434328	41435564		chr24	12759314	12761952		chr20	29262893	29264104
chr14	41469296	41471393		chr24	12773623	12775673		chr20	29616072	29616516
chr14	41472523	41473636		chr24	13107547	13108942		chr20	29630933	29631824
chr14	41475269	41476409		chr24	15909327	15910358		chr20	29647289	29647990
chr14	41661781	41662336		chr24	19475152	19477240		chr20	29651219	29652072
chr14	42739793	42745123		chr24	19479407	19481092		chr20	29654808	29655274
chr14	42745874	42747052		chr24	22808518	22811502		chr20	29656540	29658360
chr14	43033656	43036433		chr24	22813442	22816297		chr20	29965527	29966318
chr14	50565608	50568328		chr24	22816302	22817151		chr20	30106500	30107530
chr14	51011690	51012972		chr24	22817371	22819188		chr20	30135205	30135895
chr14	52706934	52708239		chr24	22820149	22824777		chr20	30218555	30219942
chr11	2297045	2297555		chr24	22825472	22826280		chr20	30445236	30446478
chr11	2307881	2310540		chr24	22866761	22870428		chr20	30521614	30522123
chr11	8205126	8206206		chr24	22870571	22871277		chr20	30634112	30634873
chr11	8206208	8207388		chr24	22872095	22872589		chr20	31472682	31473483
chr11	8396629	8397206		chr24	23294963	23297684		chr20	31750220	31750763
chr11	10448220	10450637		chr24	23432528	23434467		chr20	31918370	31919054
chr11	18355185	18355819		chr24	23471167	23471876		chr20	32468615	32469211
chr11	20292467	20294271		chr24	29737717	29739621		chr20	32472902	32473385
chr11	20639497	20641971		chr24	30522055	30523965		chr20	32500161	32501792
chr11	21176866	21179152		chr24	36249581	36251077		chr20	33022100	33023462
chr11	21182195	21182808		chr24	36251700	36253554		chr20	33050804	33051871
chr11	22017021	22017501		chr24	36254362	36256042		chr20	33146358	33146876
chr11	23095744	23098148		chr24	36257159	36258012		chr20	33220670	33221951
chr11	24705195	24707159		chr24	36263624	36267508		chr20	33353376	33354247
chr11	29052022	29052549		chr25	445494	446658		chr20	33735610	33736209
chr11	30413869	30418157		chr25	548030	549932		chr20	33798674	33799548
chr11	30836890	30837894		chr25	9255857	9256458		chr20	33803311	33803960
chr11	30837920	30840577		chr25	9258331	9261609		chr20	34140315	34141028
chr11	33465861	33466328		chr25	9262325	9264889		chr20	34147973	34148851
chr11	33468969	33472139		chr25	9265653	9266581		chr20	34380298	34381066
chr11	35097119	35098224		chr25	9285268	9285893		chr20	34557336	34557855
chr11	35117124	35119922		chr25	10287462	10288694		chr20	34898059	34898632
chr11	35127629	35128192		chr25	10290504	10292264		chr20	35668958	35670073
chr11	35128560	35130088		chr25	10292785	10296288		chr20	36337385	36339130
chr11	35133668	35134271		chr25	11957917	11959763		chr20	36408817	36409498
chr11	37643018	37643980		chr25	14280169	14284205		chr20	36496877	36497855
chr12	2019281	2022313		chr25	14624151	14626230		chr20	36499988	36500524
chr12	2023446	2024536		chr25	15226971	15229163		chr20	36613095	36614498
chr12	2071548	2072638		chr25	18788941	18790903		chr20	36861528	36862702
chr12	9319817	9321163		chr25	18812323	18814084		chr20	37045488	37048083
chr12	11144937	11147466		chr25	18822075	18828532		chr20	37440048	37441048
chr12	13081604	13084591		chr25	18868819	18869682		chr20	37467875	37468472
chr12	16810655	16812227		chr25	18882983	18884922		chr20	37507978	37508444
chr12	18112163	18114431		chr25	18885114	18886673		chr20	37812664	37813269
chr12	20376445	20376959		chr25	18888571	18890550		chr20	38276475	38278195
chr12	20392099	20392839		chr25	18913079	18915606		chr20	38862305	38863489
chr12	23172214	23173030		chr25	18918164	18919133		chr20	38868521	38869631
chr12	24483921	24484494		chr25	20436935	20440871		chr20	39576855	39578828
chr12	31851357	31857117		chr25	20440939	20442694		chr20	39587916	39588843
chr12	32006584	32007868		chr25	21229381	21232473		chr20	39589734	39590684
chr12	34580752	34583061		chr25	21249503	21250961		chr20	39618199	39619652
chr12	37947958	37949134		chr25	21253192	21254727		chr20	39667602	39668134
chr12	39665628	39666869		chr25	22126193	22127965		chr20	39670578	39672227
chr12	41713572	41713993		chr25	23943767	23945014		chr20	40344594	40346600
chr12	41714779	41716106		chr25	33451353	33454206		chr20	40754102	40756210
chr12	43021320	43022281		chr25	33454676	33455580		chr20	41133541	41134058
chr12	43025810	43027810		chr25	33465481	33466498		chr20	41236778	41238278
chr21	2313195	2313971		chr25	35784018	35785012		chr20	41819010	41819867
chr21	2316432	2317947		chr18	25762285	25763853		chr20	42119107	42120189
chr21	4643325	4644911		chr18	25802462	25805002		chr20	42221720	42222910
chr21	8768101	8769929		chr18	25972087	25974329		chr20	42288728	42289956
chr21	10841471	10844012		chr18	25974887	25976602		chr20	42529811	42530605
chr21	11751968	11752625		chr18	25980107	25982838		chr20	43099438	43101201
chr21	14548283	14549526		chr18	28985072	28986524		chr20	43233874	43235259
chr21	15213789	15215911		chr14	29418877	29421952		chr20	45692889	45695031
chr21	15840837	15841454		chr14	29424363	29427601		chr20	47363569	47364773
chr21	15842876	15844199		chr14	29428453	29429644		chrZV8_NA10704	56642	57384
chr21	15876821	15878715		chr14	32067736	32069666		chrZV8_NA3309	22877	23369
chr21	16890662	16892393		chr14	32489439	32489888		chrZV8_NA2181	159	2341
chr21	18939898	18941090		chr14	33380099	33382189		chrZV8_NA2446	7989	9580
chr21	18946807	18948557		chr14	33382626	33386540		chrZV8_NA2043	1437	1825
chr21	20063165	20065635		chr14	34161123	34163943		chrZV8_NA4570	5999	7353
chr21	21412299	21413093		chr14	34207438	34208096		chrZV8_NA654	775	1387
chr21	21414304	21415661		chr3	53620449	53623093		chrZV8_NA6934	1206	2833
chr21	24346475	24348083		chr14	34222099	34225473		chrZV8_NA8792	20785	21767
				chr14	34227268	34229066		chrZV8_NA8792	109792	110748
				chr14	34248646	34250852		chrZV8_SCAFFOLD3103	206897	207916
				chr14	34254295	34255954		chrZV8_SCAFFOLD3103	211742	212406
				chr14	34257237	34264318		chrZV8_NA3704	38028	38571
				chr14	34265060	34266532		chrZV8_NA6422	36391	37363
				chr3	58351071	58352247		chrZV8_NA110	42503	43104
				chr2	3553297	3555307		chrZV8_NA9002	114405	115098
				chr2	7199042	7200329		chrZV8_NA9002	124139	124676
				chr2	7202288	7204608		chrZV8_NA9009	5807	6126
				chr2	7204745	7206225		chr10	85734	86242
				chr2	7209250	7210712		chr10	618869	621086
				chr2	7211857	7214451		chr10	625801	626940
				chr2	7269778	7272135		chr10	935701	937535
				chr2	8800983	8802290		chr10	1288323	1290392
				chr2	8817767	8819283		chr10	1297182	1299178
				chr2	10039280	10040888		chr10	1351248	1352078
				chr2	11276330	11277506		chr10	1398230	1398875
				chr2	11279191	11281028		chr10	2664846	2666095
				chr2	11283542	11285055		chr10	2721000	2722457
				chr2	11317563	11318407		chr10	4118141	4119353
				chr2	15101855	15104106		chr10	4161079	4162674
				chr2	15105378	15109787		chr10	4171136	4171836
				chr2	15110299	15111771		chr10	4187114	4188128
				chr2	15850074	15851314		chr10	4206963	4207742
				chr2	16545669	16546594		chr10	4841860	4843126
				chr2	20029169	20031720		chr10	5691781	5692325
				chr2	20135606	20137173		chr10	5944525	5946739
				chr2	20302993	20304329		chr10	6411813	6413604
				chr2	20305851	20307702		chr10	6662140	6663736
				chr2	20336968	20341770		chr10	7434669	7435259
				chr2	20349669	20350174		chr10	7521997	7522608
				chr2	20351156	20354229		chr10	7550058	7550809
				chr2	20663582	20665019		chr10	8867509	8869201
				chr2	23938951	23939629		chr10	9739583	9740473
				chr2	24013103	24013941		chr10	10052222	10054298
				chr2	24015423	24017718		chr10	10138183	10139606
				chr2	24017917	24020315		chr10	10830559	10831899
				chr2	24021392	24024296		chr10	10981268	10981995
				chr2	24029147	24030573		chr10	11250731	11251814
				chr2	24031511	24032911		chr10	11484487	11486688
				chr2	24033202	24035116		chr10	12792051	12793720
				chr2	24036109	24036967		chr10	12988311	12989351
				chr2	25072846	25075232		chr10	13305762	13306421
				chr2	26130554	26131801		chr10	13576851	13577653
				chr2	26134907	26136122		chr10	13577694	13578977
				chr2	26640965	26643298		chr10	13688326	13689142
				chr2	27719390	27720141		chr10	14173552	14174572
				chr2	28276141	28277973		chr10	14390445	14391377
				chr2	28927050	28927773		chr10	15332875	15334626
				chr2	29366679	29368434		chr10	15663898	15664995
				chr2	30709090	30710164		chr10	15908062	15909047
				chr2	31060809	31061459		chr10	16502956	16503619
				chr2	31103807	31107787		chr10	16741438	16742824
				chr2	31976809	31977647		chr10	16924814	16925461
				chr2	33519991	33522337		chr10	17212816	17213486
				chr2	33987758	33989487		chr10	17239825	17241585
				chr2	33990189	33991345		chr10	17303022	17303667
				chr2	33991687	33992058		chr10	18113540	18115549
				chr2	35145529	35146349		chr10	20328478	20330371
				chr2	35375224	35377356		chr10	21102057	21102720
				chr2	38076401	38078832		chr10	21492804	21495628
				chr2	38125494	38126968		chr10	21506291	21507352
				chr2	39096971	39098457		chr10	22564393	22565311
				chr2	39112258	39113513		chr10	22711715	22712375
				chr2	39122017	39122900		chr10	22729259	22730108
				chr2	39126113	39129046		chr10	22742372	22743568
				chr2	39137800	39139465		chr10	22963557	22966051
				chr2	39140604	39142524		chr10	22994448	22995908
				chr2	39143465	39145219		chr10	23571111	23572321
				chr2	39145345	39147722		chr10	23619001	23620451
				chr2	39149060	39150014		chr10	23648139	23649842
				chr2	39713368	39714487		chr10	23667459	23668843
				chr2	39716997	39718564		chr10	23716129	23716646
				chr1	12360864	12363068		chr10	23806180	23807095
				chr1	12425951	12426956		chr10	24081297	24081941
				chr1	24256610	24259034		chr10	25089936	25091606
				chr1	25335834	25336632		chr10	25102219	25104038
				chr1	29389952	29393109		chr10	25157231	25158657
				chr1	29438660	29441722		chr10	25682024	25683598
				chr1	35562034	35563332		chr10	26389227	26389977
				chr1	37014851	37017872		chr10	26395774	26396485
				chr1	37021334	37023821		chr10	26406460	26407540
				chr1	37024097	37025879		chr10	26462250	26463234
				chr1	37125099	37127118		chr10	29092092	29092768
				chr1	37180419	37182502		chr10	29179308	29180360
				chr1	39096329	39097282		chr10	29181164	29182815
				chr1	43127369	43127821		chr10	29302894	29304010
				chr1	43304889	43306364		chr10	29667582	29669043
				chr1	44822566	44824704		chr10	30284785	30285920
				chr1	47367785	47369562		chr10	30790062	30790659
				chr1	47369901	47372795		chr10	30793144	30794233
				chr1	48752950	48758164		chr10	31471276	31472413
				chr1	48758412	48760833		chr10	32573962	32575082
				chr1	48765249	48767276		chr10	33183287	33184151
				chr1	49350404	49352821		chr10	33771745	33772641
				chr1	49835502	49836179		chr10	33774822	33775452
				chr1	49837935	49840264		chr10	34615239	34616279
				chr1	49865117	49867194		chr10	34901028	34901592
				chr1	49869018	49869945		chr10	35511847	35512488
				chr1	53433257	53435200		chr10	36071299	36071885
				chr1	53460762	53462921		chr10	36479125	36479979
				chr7	10807099	10808625		chr10	36529816	36530648
				chr7	18767544	18769604		chr10	36638318	36640227
				chr9	12569872	12572099		chr10	36706687	36707607
				chr9	12581579	12583058		chr10	36711408	36712359
				chr9	12731644	12733700		chr10	36714887	36716018
				chr9	12744229	12746026		chr10	36717828	36718564
				chr9	12932136	12934308		chr10	37628276	37629031
				chr9	12935214	12935813		chr10	37703416	37704041
				chr9	12963304	12964681		chr10	37804222	37805157
				chr9	12966838	12968464		chr10	39022488	39023731
				chr9	12988124	12991202		chr10	40267995	40269552
				chr9	12991243	12996865		chr10	40524242	40525261
				chr9	12998689	13000801		chr10	41381889	41382526
				chr9	13001548	13002988		chr10	41558960	41560178
				chr9	14020896	14022012		chr10	42559125	42559757
				chr9	14064652	14065511		chr10	42573347	42575207
				chr9	14069206	14071483		chr10	42598784	42600161
				chr9	14077432	14078375		chr10	43276618	43278173
				chr9	14081002	14082955		chr10	43365036	43366212
				chr9	14084648	14085742		chr10	43373992	43374893
				chr9	16235311	16237002		chrZV8_NA8830	49872	50262
				chr9	16238773	16240243		chrZV8_NA2599	8885	9953
				chr9	20851962	20854470		chrZV8_NA4561	104416	105680
				chr9	20987095	20988908		chrZV8_NA4561	106887	108060
				chr9	25205118	25207365		chrZV8_NA4561	112375	113214
				chr9	25207475	25209928		chrZV8_NA5455	6042	8014
				chr9	25210868	25212874		chrZV8_NA1664	52878	53956
				chr9	25223212	25226600		chrZV8_NA1664	62666	63390
				chr9	25226675	25230837		chrZV8_NA1664	73054	73865
				chr9	25233128	25234970		chrZV8_NA4264	22431	23580
				chr9	25412056	25413683		chrZV8_SCAFFOLD2985	170039	170623
				chr9	25421027	25422151		chrZV8_NA4490	48125	48940
				chr9	25423678	25427179		chrZV8_NA9417	76038	76564
				chr9	25430686	25431550		chrZV8_NA11329	60860	62001
				chr9	25431764	25435365		chrZV8_NA2640	1873	4201
				chr9	25436082	25438366		chrZV8_NA6036	396739	398656
				chr9	27712175	27715324		chrZV8_NA127	94591	95544
				chr9	28247910	28249905		chr7	37528965	37529762
				chr9	31140840	31142038		chrZV8_NA127	97187	97896
				chr9	31143318	31144850		chr7	37672102	37672787
				chr9	31336013	31336968		chr7	37742123	37742858
				chr9	31569754	31570331		chr7	37745425	37746002
				chr9	31597103	31598115		chr7	37755607	37757283
				chr9	33164894	33166010		chr7	37768764	37769861
				chr9	33273908	33275019		chr7	37825694	37827453
				chr9	34261121	34263405		chr7	37907838	37909600
				chr9	34357989	34359857		chr7	37979755	37981092
				chr9	34374168	34375969		chr7	37986259	37987900
				chr9	34854043	34855870		chrZV8_NA127	104283	105326
				chr9	37788487	37790247		chr7	38091853	38092337
				chr9	37812722	37814554		chr7	38131889	38132774
				chr9	37816344	37818456		chr7	38291982	38292815
				chr9	38208863	38209346		chr7	38391036	38391636
				chr9	42100242	42101355		chr7	38415279	38416113
				chr9	42103271	42104952		chrZV8_NA2032	58515	59536
				chr9	42118155	42119629		chr7	39133353	39134709
				chr9	42121546	42125025		chrZV8_NA4272	13412	15514
				chr9	42128238	42129519		chrZV8_NA4480	501	1498
				chr9	42147438	42147935		chrZV8_NA4480	73191	74100
				chr9	42149274	42153060		chrZV8_NA2538	75960	77728
				chr9	42154289	42154916		chrZV8_NA4983	50621	51601
				chr9	42193166	42195027		chrZV8_NA7986	13602	14423
				chr9	42963720	42964601		chrZV8_NA2004	1065	1539
				chr9	44277946	44279191		chrZV8_NA1642	40175	40835
				chr8	4814612	4817611		chrZV8_NA416	36611	36859
				chr8	9246201	9249808		chrZV8_NA2545	4755	5127
				chr8	9251423	9252812		chrZV8_NA2545	19792	20313
				chr8	9319546	9321472		chr7	40133191	40134413
				chr8	9993653	9994752		chr7	40241209	40241684
				chr8	16451760	16453316		chr7	40602820	40604473
				chr8	16525852	16527822		chrZV8_NA6005	27588	28536
				chr14	35993271	35994866		chrZV8_NA2543	46322	47532
				chr14	36005302	36006109		chrZV8_NA2543	64733	65748
				chr14	36007603	36010338		chrZV8_NA2543	69800	71416
				chr14	36011871	36012674		chrZV8_SCAFFOLD2966	155779	156441
				chr14	36530464	36532419		chrZV8_NA5536	79119	80666
				chr14	42484213	42486979		chrZV8_NA3924	37869	38788
				chr14	42488224	42490019		chrZV8_NA8543	1	1473
				chr14	44889985	44892296		chrZV8_NA9503	473	1943
				chr14	50743486	50744464		chrZV8_NA151	4633	5982
				chr11	2078030	2079861		chrZV8_NA3921	36804	37278
				chr11	8083629	8085880		chrZV8_NA2353	29410	30629
				chr11	16209265	16211362		chrZV8_NA2350	99103	100086
				chr11	16263571	16265311		chrZV8_SCAFFOLD2974	41873	42840
				chr11	16277934	16280859		chrZV8_SCAFFOLD2974	45971	46835
				chr11	16282793	16283438		chrZV8_SCAFFOLD2974	61007	61734
				chr11	17931895	17933443		chrZV8_NA7693	5598	6353
				chr11	18112830	18113404		chrZV8_NA6356	42868	44551
				chr11	18247890	18249348		chrZV8_NA1958	82411	82852
				chr11	19437006	19440424		chrZV8_NA841	11241	12371
				chr11	21069327	21070618		chrZV8_NA594	25887	26578
				chr11	22241006	22242835		chrZV8_NA2274	53836	55270
				chr11	22293180	22297034		chrZV8_NA2271	62977	63422
				chr11	22300992	22302846		chrZV8_NA2811	9192	10416
				chr11	22302878	22304683		chrZV8_NA7111	3601	4144
				chr11	22332215	22335032		chrZV8_NA4228	3710	4323
				chr11	22576915	22578354		chrZV8_NA2750	3399	4318
				chr11	22615044	22617433		chrZV8_SCAFFOLD3071	187798	188924
				chr11	22620401	22622345		chrZV8_NA3899	87109	87475
				chr11	22659055	22660581		chrZV8_NA5228	7244	8194
				chr11	23952413	23953200		chrZV8_NA2278	37455	38020
				chr11	25733826	25734820		chrZV8_NA7415	204	896
				chr11	25808167	25810042		chrZV8_NA4370	99597	100033
				chr11	26073986	26079060		chrZV8_NA4370	178707	179184
				chr11	28235082	28236109		chrZV8_NA4370	186801	188171
				chr11	28242548	28244209		chrZV8_NA2947	43667	44831
				chr11	28451359	28452856		chrZV8_SCAFFOLD3088	104027	104747
				chr11	28453451	28455935		chrZV8_NA707	19765	20525
				chr11	30503479	30504450		chrZV8_NA835	5629	7650
				chr11	30546250	30547156		chrZV8_SCAFFOLD3086	78178	79128
				chr11	34978243	34980654		chrZV8_SCAFFOLD3086	137498	137941
				chr11	38960633	38961592		chrZV8_NA839	45	1100
				chr11	40881052	40881752		chrZV8_NA3125	17898	18402
				chr11	41729658	41730096		chrZV8_NA7327	11930	12205
				chr11	41787068	41788363		chrZV8_NA3126	47375	48045
				chr11	43112617	43115040		chrZV8_NA3126	145618	146290
				chr11	43546184	43548677		chrZV8_NA3126	151384	152282
				chr12	9232849	9234846		chrZV8_NA3126	158720	160073
				chr12	20780204	20783149		chrZV8_NA5218	27166	28973
				chr12	20785859	20788168		chrZV8_NA2365	69562	70380
				chr12	20811975	20812930		chrZV8_NA2365	73342	74154
				chr12	23733879	23736583		chrZV8_NA574	4342	4696
				chr12	23916770	23918766		chrZV8_NA8350	169422	171179
				chr12	26231387	26233809		chrZV8_NA3223	3829	4290
				chr12	26235454	26236094		chrZV8_NA3223	7085	7668
				chr12	29949343	29950448		chrZV8_NA578	5370	6491
				chr12	29950570	29954393		chrZV8_NA2749	27216	28126
				chr12	29958055	29959810		chrZV8_NA5604	58048	58550
				chr12	29962261	29963678		chrZV8_NA5200	30726	31343
				chr12	29964499	29969231		chrZV8_NA5605	23099	23699
				chr12	33693396	33694817		chrZV8_NA4763	39217	39571
				chr12	33697773	33698983		chrZV8_NA8209	81527	82233
				chr12	33775501	33776572		chrZV8_NA3779	14371	15360
				chr12	33891052	33892255		chrZV8_NA2733	3314	4020
				chr12	33933082	33935292		chrZV8_NA2733	57175	58072
				chr12	35227331	35228757		chrZV8_NA3234	6751	8596
				chr12	35263640	35264624		chrZV8_NA3234	25388	26903
				chr12	35266481	35268406		chrZV8_NA3235	2997	3565
				chr12	36392913	36394429		chrZV8_NA2116	13861	14526
				chr12	36397108	36400482		chrZV8_NA6078	19035	19578
				chr12	36409205	36410266		chrZV8_NA1380	119345	121247
				chr12	36411845	36414294		chrZV8_NA2254	62734	64859
				chr12	36629961	36631497		chrZV8_NA5209	149384	150181
				chr12	36632229	36633836		chrZV8_NA2627	53003	54152
				chr12	41323636	41327263		chrZV8_SCAFFOLD3062	68747	69571
				chr12	41365633	41368328		chrZV8_SCAFFOLD3061	195539	196585
				chr12	41377280	41378263		chrZV8_NA3249	25778	26656
				chr21	16076961	16079005		chrZV8_NA2623	100505	101260
				chr21	21279720	21283913		chrZV8_SCAFFOLD3032	22086	23321
				chr21	21801683	21803205		chrZV8_NA2993	123361	123767
				chr21	21858153	21859996		chrZV8_NA7849	4442	6339
				chr21	21876485	21879441		chrZV8_SCAFFOLD3034	166248	166682
				chr21	21893909	21896216		chrZV8_NA3087	21459	22465
				chr21	21901505	21902540		chrZV8_NA3085	12795	13622
				chr21	21984640	21987329		chrZV8_SCAFFOLD3038	156711	158042
				chr21	21988281	21989381		chrZV8_NA3557	5124	5679
				chr21	21990156	21994913		chrZV8_NA10729	19479	20623
				chr21	25301585	25307609		chrZV8_NA10729	21793	23150
				chr21	25308674	25310641		chrZV8_NA10202	1703	3041
				chr21	25311870	25313523		chrZV8_NA3754	41763	43041
				chr21	25350382	25353326		chrZV8_NA3075	28	3754
				chr21	25354658	25355160		chrZV8_SCAFFOLD3049	372398	373696
				chr21	25370316	25372445		chrZV8_NA2987	33668	35107
				chr21	25372549	25374450		chrZV8_NA4900	17205	18401
				chr21	25380273	25381909		chrZV8_NA3984	101183	101817
				chr21	25432284	25433983		chrZV8_SCAFFOLD3041	150425	151483
				chr21	25695211	25697946		chrZV8_SCAFFOLD3041	308256	308795
								chrZV8_SCAFFOLD3041	453738	455094
								chrZV8_NA3360	106	954
								chrZV8_NA3360	3232	4201
								chrZV8_NA3065	21685	22406
								chrZV8_NA3065	33960	34959
								chrZV8_NA2878	71473	72770
								chrZV8_SCAFFOLD3013	104668	105060
								chrZV8_SCAFFOLD3015	136901	137443
								chrZV8_NA2081	27286	28357
								chrZV8_NA2081	61499	62070
								chrZV8_NA3060	25051	25777
								chrZV8_NA7823	9949	11635
								chrZV8_NA7823	47045	48962
								chrZV8_NA7823	109310	110478
								chrZV8_NA4102	30046	30780
								chrZV8_NA4102	33257	35238
								chrZV8_NA1016	123156	124200
								chrZV8_NA1016	134470	136700
								chrZV8_NA4206	4971	5999
								chrZV8_NA3068	10320	10679
								chrZV8_NA10325	28091	28988
								chrZV8_NA2096	43352	44246
								chrZV8_SCAFFOLD3026	56071	56568
								chrZV8_SCAFFOLD3026	72497	73892
								chrZV8_SCAFFOLD3026	81726	82365
								chrZV8_SCAFFOLD3026	89628	91696
								chrZV8_SCAFFOLD3026	93933	95241
								chrZV8_SCAFFOLD3026	102595	103652
								chrZV8_SCAFFOLD3026	107969	109075
								chrZV8_SCAFFOLD3026	141363	142104
								chrZV8_SCAFFOLD3026	158429	159131
								chrZV8_SCAFFOLD3027	25037	25784
								chrZV8_SCAFFOLD3025	42385	44376
								chrZV8_SCAFFOLD3025	162340	163051
								chrZV8_SCAFFOLD3025	653131	654001
								chrZV8_SCAFFOLD3025	685855	686706
								chrZV8_NA5992	68	645
								chrZV8_SCAFFOLD3029	208828	210479
								chrZV8_SCAFFOLD3029	272633	273409
								chrZV8_SCAFFOLD3029	288915	290076
								chrZV8_SCAFFOLD3029	309408	310658
								chrZV8_NA6361	57144	57937
								chrZV8_NA4212	45638	46250
								chrZV8_NA3748	53893	55451
								chrZV8_NA3883	8775	10076
								chrZV8_NA3883	145605	146196
								chr8	17767234	17768205
								chr8	19183704	19184858
								chr8	19368020	19369597
								chr8	19731629	19732185
								chr8	20079629	20080643
								chr8	20214932	20215743
								chr8	20247663	20249364
								chr8	20266594	20267137
								chr8	20425170	20425937
								chr8	20879087	20880435
								chr8	20908381	20909047
								chr8	22067627	22069501
								chr8	22285655	22286549
								chr8	22294275	22295349
								chr8	24617058	24617909
								chr8	24979289	24979959
								chr8	24985632	24987232
								chr8	26327697	26328983
								chr8	26409663	26411042
								chr8	27423283	27423944
								chr8	27507772	27508329
								chr3	51982296	51984225
								chr8	28966810	28967807
								chr8	28969633	28971886
								chr8	29300337	29301430
								chr8	30285700	30286310
								chr8	30339294	30340930
								chr8	30966319	30967164
								chr8	32080418	32081164
								chr8	32346790	32347395
								chr8	33055167	33056058
								chr8	33933576	33934407
								chr8	34065648	34066801
								chr8	34072637	34073407
								chr8	34083999	34085708
								chr8	34121673	34122548
								chr8	34897962	34899393
								chr8	35339065	35340026
								chr8	35658727	35660214
								chr8	36332453	36334707
								chr8	36363989	36364557
								chr8	36919645	36920207
								chr8	36934164	36934754
								chr8	39401949	39402789
								chr8	40427236	40428479
								chr8	40505612	40506684
								chr8	40680765	40681422
								chr8	40761340	40762920
								chr8	40878518	40879490
								chr8	42018775	42019522
								chr8	42300597	42301602
								chr8	42665327	42667651
								chr8	43281839	43282826
								chr8	43408595	43410320
								chr8	44416925	44417480
								chr8	46623623	46624135
								chr8	47710900	47712987
								chr8	48363557	48364148
								chr8	48978737	48979261
								chr8	50440400	50441951
								chr8	50459601	50460913
								chr8	50472299	50474116
								chr8	50589797	50590871
								chr8	54971230	54973225
								chrZV8_NA4845	182214	183584
								chrZV8_SCAFFOLD3112	183561	185125
								chrZV8_NA2576	23162	23757
								chrZV8_NA10559	1	694
								chrZV8_NA4579	105467	106113
								chr19	574659	575290
								chr19	1039571	1041843
								chr19	1176027	1176900
[truncated: 2,225 more rows]

## Sheet: Table_S7
80% epiboly_VS_24hpf H3K27ac differentially acetylated regions
[truncated: 3,558 more rows]

[truncated: 12 more sheets: Table_S8, Table_S9, Table_S10, Table_S11, Table_S12, Table_S13, Table_S14, Table_S15, Table_S16, Table_S17, Table_S18, Hoja1]
