# Supplementary material for: Dynamics of enhancer chromatin signatures mark the transition from pluripotency to cell specification during embryogenesis
Source: HighWire-hosted journal article supplement (doi:10.1101/gr.134833.111), 2012-05-16
Supplement: Sup_tables_S19-S25_Zv9_data.xlsx [file Sup_tables_S19-S25_Zv9_data.xlsx]

## Sheet: Table_S19
PDREs_Zv9_dome
chr5	73284894	73286079
chr10	30083240	30084221
chr8	45753921	45756756
Zv9_NA494	8840	10380
chr19	2912669	2913931
chr6	56736410	56737410
chr24	35601823	35603430
chr5	50682672	50684093
chr11	44484700	44486875
chr1	35085136	35087289
chr3	48755323	48756913
Zv9_NA817	63034	64017
chr5	59626827	59628045
chr8	10997284	10998846
Zv9_NA152	24409	26177
chr2	4433809	4435355
chr25	33756012	33757835
chr20	45712299	45713448
chr17	50164795	50167510
Zv9_NA460	21689	22960
chr1	4837858	4840343
chr14	1070341	1071565
chr15	45023305	45025232
chr15	44112840	44114029
chr2	41417962	41420355
chr21	13173996	13177508
chr2	34471244	34474971
chr13	47147482	47148687
chr23	4506905	4508595
chr22	12454912	12456896
chr16	55910353	55911803
chr24	26595784	26597628
chr9	30781115	30783345
chr7	75356861	75358767
chr15	7256712	7259842
Zv9_scaffold3556	30889	32941
chr3	13487016	13489067
chr18	41493840	41497410
Zv9_scaffold3535	281548	282719
Zv9_NA79	94507	95820
Zv9_NA79	88886	90558
chr9	5541482	5542914
chr18	2893995	2896032
chr18	11151507	11152754
chr22	5251423	5254107
Zv9_NA638	4768	6469
chr7	75629174	75630698
chr9	51651727	51652678
chr10	12431168	12432628
chr10	12491583	12493924
chr11	35156018	35157071
chr18	31309955	31310868
chr16	8354817	8356866
chr15	3753540	3754812
Zv9_NA675	65146	66785
chr8	45609230	45611500
chr16	55981301	55982745
Zv9_scaffold3463	11259	12591
chr14	569407	570928
Zv9_NA545	191070	192304
Zv9_NA649	7832	8860
Zv9_NA650	43243	44588
chr7	73137839	73139960
chr5	62819023	62823039
chr5	62827324	62830021
chr13	20579817	20581714
Zv9_NA853	1241	2171
chr12	46273336	46275145
chr16	950077	951376
Zv9_NA372	85874	87470
chr12	8787212	8788854
chr12	8888121	8889441
chr14	37801039	37802342
Zv9_scaffold3512	38729	41002
Zv9_scaffold3512	57846	59291
Zv9_scaffold3512	60128	62401
Zv9_scaffold3485	20358	22939
chr20	53986615	53988870
chr1	30692100	30695440
chr1	30705432	30707509
chr16	51254250	51258082
chr2	985047	987629
Zv9_scaffold3460	15647	17793
chr17	42206956	42208947
chr17	42021772	42024360
chr17	42014020	42017608
chr17	41649693	41654251
chr17	41613161	41615637
chr20	44610589	44612273
Zv9_scaffold3471	117710	119172
Zv9_scaffold3551	208348	209777
chr2	25366800	25368156
chr9	27974081	27976396
chr6	44768006	44769785
chr16	32420774	32423925
Zv9_scaffold3534	102543	105030
chr9	5251110	5253284
Zv9_scaffold3477	38249	39704
chr16	46721946	46723510
chr5	20879462	20880828
chr21	30720301	30724468
chr8	29458070	29459096
chr9	4910405	4915167
chr1	4220154	4221836
chr1	4679409	4681311
chr1	5368659	5371090
chr1	7081933	7083165
chr1	10675679	10678068
chr1	13714633	13715790
chr1	14581498	14583134
chr1	15499348	15504568
chr1	16045745	16048262
chr1	16124908	16127225
chr1	17123034	17124685
chr1	17124742	17126962
chr1	17379236	17381796
chr1	17910506	17912785
chr1	18007181	18008552
chr1	18421730	18424357
chr1	19059020	19062216
chr1	19413433	19414639
chr1	20003995	20005218
chr1	20073056	20076105
chr1	21440236	21443996
chr1	28002450	28004696
chr1	27889687	27891756
chr1	28661308	28663368
chr1	22935979	22938358
chr1	23715584	23717528
chr1	25251236	25253067
chr1	25805915	25807912
chr1	25846252	25851225
chr1	25919021	25921929
chr1	30063388	30064974
chr1	33674587	33676436
chr1	36722634	36724086
chr1	36719356	36721321
chr1	39052260	39055075
chr1	38633140	38634600
chr1	38588468	38591668
chr1	38276696	38280147
chr1	40819315	40821301
chr1	40699845	40701590
chr1	40290932	40294000
chr1	39794895	39797433
chr1	39594173	39596234
chr1	39336002	39341651
chr1	41278622	41280832
chr1	45240948	45242342
chr1	46061361	46064217
chr1	42322480	42323984
chr1	42912474	42915405
chr1	43097207	43099458
chr1	44182776	44187169
chr1	44394752	44396899
chr1	47717524	47720072
chr1	47722243	47723585
chr1	49848598	49850132
chr1	49845342	49847165
chr17	10773092	10774885
chr17	10775056	10777491
chr1	50331358	50333273
chr1	50719841	50721487
chr1	51395609	51398587
chr1	51879590	51881397
chr1	54668672	54670472
chr1	55388608	55389848
chr1	55261419	55263186
chr10	2960223	2962284
chr10	4626071	4627315
chr10	5464581	5466367
chr10	8650576	8652790
chr10	7355381	7357474
chr10	6952464	6954330
chr10	9678235	9681385
chr10	14837646	14839297
chr10	15422760	15424836
chr10	15468505	15469890
chr10	16278914	16280774
chr10	13205076	13206719
chr10	13462258	13463637
chr10	13536858	13538543
chr10	14346761	14348273
chr10	11194522	11196621
chr10	10981856	10983730
chr10	10862288	10864187
chr10	10606625	10608976
chr10	10514195	10515912
chr10	10283091	10286871
chr10	10184811	10186883
chr10	10066039	10067552
chr10	18836289	18838073
chr10	18223266	18224654
chr10	17894037	17895618
chr10	17507859	17509619
chr10	22355454	22357463
chr10	20310404	20312347
chr10	19981261	19983154
chr10	26295894	26298263
chr10	26535040	26538235
chr10	26664954	26668731
chr10	26673778	26675996
chr10	26852112	26853880
chr10	27174279	27175280
chr10	27839138	27840640
chr10	28124045	28126539
chr10	28219297	28221572
chr10	23722198	23724333
chr10	23724835	23726709
chr10	23867590	23869532
chr10	25168950	25171584
chr10	30342937	30344663
chr10	30718352	30720278
chr10	30825600	30827458
chr10	31552319	31555387
chr10	32437360	32440087
chr10	32441105	32448213
chr10	34699543	34700921
chr10	35559472	35561855
chr10	36390298	36391793
chr10	36497633	36499225
chr10	37079500	37082007
chr10	37573285	37574807
chr10	37575515	37577651
chr10	39045367	39047059
chr10	39088416	39092141
chr10	39098689	39100823
chr10	39340355	39342473
chr10	39497845	39500356
chr10	39504223	39506478
chr10	39733080	39735117
chr10	43794703	43796260
chr10	44775645	44777484
chr10	46139477	46141734
chr10	46260152	46261582
chr11	3181737	3184396
chr11	2266425	2269324
chr11	2827258	2829781
chr11	5473917	5476023
chr11	6145196	6147109
chr11	6556862	6558660
chr11	6597328	6599772
chr11	6697920	6699288
chr11	6904293	6905485
chr11	6993459	6995396
chr11	7605018	7606524
chr11	7316612	7318204
chr11	8706421	8709305
chr11	8639293	8642105
chr11	8626944	8629179
chr11	11024797	11026709
chr11	10042183	10043636
chr11	12922053	12924470
chr11	14765209	14766902
chr11	18854919	18856318
chr11	19149394	19150746
chr11	19155211	19158334
chr11	19478996	19480797
chr11	19702160	19704741
chr11	19797742	19799971
chr11	19824234	19826719
chr11	19834652	19837165
chr11	24473370	24474735
chr11	24398043	24400517
chr11	24095193	24097455
chr11	23927654	23930374
chr11	23862611	23864555
chr11	23514303	23515831
chr11	23031671	23033989
chr11	22720475	22722819
chr11	22023612	22024874
chr11	22011487	22013891
chr11	24979362	24982213
chr11	25934431	25939445
chr11	26512419	26514156
chr11	26741101	26743448
chr11	26895727	26897268
chr11	27662971	27665887
chr11	28549849	28552420
chr11	29704967	29706613
chr11	29853661	29856136
chr11	30380892	30383103
chr11	32282976	32287264
chr11	31002700	31005623
chr11	32897545	32899720
chr11	33056224	33059276
chr11	33200158	33202023
chr11	33233382	33235250
chr11	33238894	33240338
chr11	35608880	35611678
chr11	35578647	35580389
chr11	36438254	36439747
chr11	37023238	37025131
chr11	37831993	37833633
chr11	40301560	40303780
chr11	40460190	40462716
chr11	42175809	42177343
chr11	43136734	43139560
chr11	43154471	43156312
chr11	43173260	43176170
chr17	1917928	1919653
chr17	1926467	1927955
chr17	1929486	1930962
chr17	1934371	1937403
chr5	3389271	3390970
chr12	9313501	9315077
chr12	9595542	9597423
chr12	9650205	9651639
chr12	9701774	9702755
chr12	9732691	9735083
chr12	9767138	9768810
chr12	9779519	9782156
chr12	11602606	11605094
chr12	12975063	12976827
chr12	13101668	13103499
chr12	13463869	13466856
chr12	15327847	15329779
chr12	18257057	18259271
chr12	20718928	20721892
chr12	21569147	21572491
chr12	28002917	28004638
chr12	27761695	27762851
chr12	27563298	27566317
chr12	27361139	27362908
chr12	26937558	26940661
chr12	26695820	26697330
chr12	30578354	30580665
chr12	23934163	23936363
chr12	23986528	23989414
chr12	24858742	24861844
chr12	25595216	25597067
chr12	26421770	26423895
chr12	26437227	26438886
chr12	32721175	32724020
chr12	32749182	32750747
chr12	33175811	33177732
chr12	33178139	33179797
chr12	33452720	33455768
chr12	33485874	33487889
chr12	34184214	34185392
chr21	32019481	32021859
chr21	32430311	32436071
chr12	34645361	34646809
chr12	36665236	36666819
chr12	36098340	36100649
chr12	36105670	36107733
chr12	35851886	35853453
chr12	37926386	37930640
chr12	37610794	37612387
chr12	38239504	38242535
chr12	38696000	38697811
chr12	38770667	38772664
chr12	38778467	38780700
chr12	39913257	39914985
chr12	39957930	39959213
chr12	40079296	40081025
chr12	40955526	40957453
chr12	44183378	44185958
chr12	44195236	44196585
chr16	2326169	2328235
chr22	8935940	8939246
chr13	975244	978837
chr13	34595200	34596724
chr13	4167829	4171500
chr13	4571059	4572934
chr13	5154721	5156743
chr13	5556894	5558673
chr13	5724768	5727431
Zv9_NA824	36044	37332
chr13	6264003	6266383
chr13	6261256	6263247
chr13	7524084	7525245
chr13	7560630	7562979
chr13	10081104	10083519
chr13	12935787	12936943
chr13	19824340	19826037
chr13	19827331	19829223
chr13	19872987	19874497
chr13	20485538	20487942
chr13	16537132	16539301
chr13	16855672	16857970
chr13	17136649	17138297
chr13	17461985	17464979
chr13	17726830	17728868
chr13	21556691	21560398
chr13	21988531	21991192
chr13	24116919	24119311
chr13	24182863	24185423
chr13	25153576	25156715
chr13	25680235	25682115
chr13	26416022	26417304
chr13	26515167	26516861
chr13	27121826	27124429
chr13	27139891	27141190
chr13	27141195	27142741
chr13	27222681	27225456
chr13	27331151	27332678
chr13	29360435	29362672
chr13	29913318	29915312
chr13	29987894	29988964
chr13	30039072	30041354
chr13	30096950	30099758
chr13	30145201	30146631
chr13	30595003	30596727
chr13	31019211	31021690
chr13	31119904	31122169
chr13	31837723	31839242
chr13	32409701	32411235
chr13	32437739	32440793
chr13	28796972	28799068
chr13	28728269	28731664
chr13	28650228	28652298
chr13	28548368	28550072
chr13	28259294	28261726
chr13	28236689	28239444
chr13	34062889	34064724
chr13	34007916	34010092
chr13	33989545	33995420
chr13	35474584	35475821
chr13	35501886	35506010
chr13	35670495	35672649
chr13	38952269	38953875
chr13	39506580	39508333
chr13	39682669	39684135
chr13	39810833	39812416
chr13	41568599	41571206
chr13	41814804	41815964
chr13	41884788	41886024
chr13	42637979	42640158
chr13	43665566	43668128
chr13	43650911	43653618
chr13	44064020	44065809
chr13	45435170	45436727
chr13	46722243	46724564
chr13	50454481	50456129
chr14	402767	404764
Zv9_NA584	69195	70891
chr14	3190273	3191768
chr14	5937427	5940006
chr14	6420120	6422277
chr14	7092649	7094670
chr1	37326111	37327268
chr14	8091865	8093285
chr14	8517005	8519269
chr14	10801068	10803733
chr14	12379357	12381019
chr14	13056239	13058549
chr14	13063453	13066269
chr14	13293512	13296373
chr14	14087629	14090801
chr14	18318437	18320544
chr14	18406516	18412337
chr14	18640008	18642667
chr14	18689719	18691678
chr14	18837575	18839531
chr14	19971252	19973610
chr14	15821254	15823642
chr14	15107983	15110397
chr14	15088020	15090413
chr14	22605851	22607831
chr14	22836008	22837497
chr14	23836833	23838481
chr14	23987146	23989707
chr14	24560933	24563555
chr14	26557681	26560657
chr14	26561990	26568162
chr14	26636816	26639254
chr14	26833006	26834971
chr14	26888819	26890657
chr14	26899638	26905619
chr14	27490741	27492155
chr14	27685747	27689376
chr14	28927809	28930876
chr14	29433243	29434678
chr14	30200263	30202775
chr14	31870445	31872775
chr14	31885113	31887122
chr14	32576956	32579152
chr14	32784276	32786702
chr14	32796856	32800399
chr14	32856052	32859589
chr14	32934732	32938435
chr14	32950707	32954078
chr14	32987361	32988730
chr14	32989440	32992324
chr14	33755458	33762307
chr14	33516122	33518307
chr14	35394195	35396463
chr14	36235686	36237641
chr14	36500007	36501551
chr14	36992797	36995907
chr14	36997901	37000680
chr14	38210591	38211807
chr14	38926703	38928725
chr14	40730783	40734376
chr14	40627342	40632570
chr14	41761009	41762836
chr14	41984125	41989455
chr14	42024919	42026304
chr14	42098694	42102389
chr14	42432494	42435271
chr14	44384981	44387055
chr14	44393426	44397014
chr14	45115428	45117988
chr5	40779927	40782116
chr14	49170676	49173585
Zv9_NA353	20244	22373
chr14	49823967	49825246
chr24	35828512	35831232
chr24	36100953	36103631
chr14	50350249	50351374
chr15	4711634	4714671
chr15	7036504	7038867
chr15	13896301	13898404
chr15	14087706	14090553
chr15	11397496	11400974
chr15	9518669	9520357
chr15	9534101	9537371
chr15	9545880	9548070
chr15	10829829	10832119
chr15	7402144	7404253
chr15	9092908	9095580
chr15	13680968	13682678
chr15	14384827	14387253
chr15	15559351	15561775
Zv9_NA344	19102	21151
chr15	17982685	17983942
chr15	18774734	18776946
chr15	19560601	19562059
chr15	19647640	19650514
chr15	21270223	21272278
chr15	21419708	21421780
chr15	21434168	21435680
chr15	22789502	22791964
chr15	24266434	24271694
chr15	24923207	24927195
chr15	26010757	26014079
chr15	27077673	27079331
chr15	27153870	27155719
chr15	27692192	27693618
chr15	27724454	27727011
chr15	28046788	28049471
chr15	28050997	28053183
chr15	28057051	28061645
chr15	28066222	28067781
chr15	28075579	28077644
chr15	28158486	28161725
chr15	28201394	28203322
chr15	28410811	28412923
chr15	29125958	29131027
chr15	30199405	30201728
chr15	30449244	30450332
chr15	32149350	32151299
chr15	32153198	32155218
chr15	32155402	32157377
chr15	33583193	33585318
chr15	34498775	34500042
chr15	35372842	35375274
chr15	35814272	35818206
chr15	36057232	36059054
chr15	37034531	37036138
chr15	38539976	38541406
chr15	39122256	39124409
chr15	39262689	39264910
chr15	40239980	40243599
chr15	40479508	40483091
chr15	40938215	40942022
chr15	40942612	40945385
chr15	44558739	44560552
chr23	34560252	34561895
chr16	1385382	1386865
chr16	2653313	2655596
chr16	5610764	5613582
chr16	5614764	5615964
chr16	6785741	6788455
chr16	7205943	7207947
chr16	7804309	7808504
chr16	8315521	8317121
chr16	8802226	8804581
chr16	8870386	8871963
chr16	8939781	8941573
chr16	8953778	8955248
chr16	8958095	8960761
chr16	9026477	9028813
chr16	9680869	9682549
chr16	9939946	9941580
chr16	11216501	11218681
chr16	11461465	11463830
chr16	12013067	12014445
chr16	12803652	12805642
chr16	13594086	13597440
chr16	13962485	13964665
chr16	15111660	15113125
chr16	15126901	15128884
chr16	15293128	15295887
chr16	15494938	15496631
chr16	17164757	17166061
chr16	18898342	18901693
chr16	21956954	21959462
chr16	24209793	24211034
chr16	25509981	25512710
chr16	25512822	25518221
chr16	26189796	26191216
chr16	26400181	26402155
chr16	26990109	26991854
chr16	28350360	28353996
chr16	29419826	29421880
chr16	30057902	30060459
chr16	30971474	30973793
chr16	31446200	31453282
chr16	31688620	31690583
chr16	31799284	31802291
chr16	34904016	34907157
chr16	35081148	35083118
chr16	35729547	35733368
chr16	38203830	38205291
chr16	40974520	40979549
chr16	42276111	42277350
chr16	43429426	43431407
chr16	43497821	43500001
chr16	43585045	43587836
chr16	43866635	43868322
chr16	43979405	43981281
chr16	44267437	44268974
chr16	44884652	44887456
chr16	51698358	51700827
chr16	48070611	48072653
chr16	47960697	47962530
chr16	53553011	53555079
chr16	54742147	54743456
chr16	57580359	57582290
chr16	58389923	58394969
chr17	7560617	7563351
chr17	7965303	7967172
chr17	8236189	8238000
chr17	6984692	6987375
chr17	7043928	7045869
chr17	12336678	12338408
chr17	13894939	13896693
chr17	13732459	13734575
chr17	16689507	16693107
chr17	15279186	15280775
chr17	15170774	15173059
chr17	14993536	14996643
chr17	19913951	19915882
chr17	18445939	18455458
chr17	17752986	17754600
chr17	21114683	21116910
chr17	21226242	21227684
chr17	21503183	21507112
chr17	21540881	21543264
chr17	22265324	22268172
chr17	23011175	23013980
chr17	23280107	23282755
chr17	24109332	24115818
chr17	24339762	24342307
chr17	25293222	25295561
chr17	25640644	25643938
chr17	25915958	25917795
chr17	26093150	26095327
chr17	27026079	27028383
chr17	27124610	27129019
chr17	28093244	28095199
chr17	29093492	29094834
chr17	29592783	29594596
chr17	29596539	29598962
chr17	29885025	29886730
chr17	29890077	29894560
chr17	30249129	30252195
chr17	30297186	30299049
chr17	30387244	30390522
chr17	30658871	30662348
chr17	30705117	30706977
chr17	31042436	31044477
chr17	31194423	31201151
chr17	33307803	33308972
chr17	33599374	33601298
chr17	33774346	33776988
chr17	34178002	34181370
chr17	34257410	34258796
chr17	34946840	34950105
chr17	35222694	35224475
chr17	35380648	35384466
chr17	36145680	36147601
chr17	36041619	36044488
chr17	36746240	36749081
chr17	36826120	36828322
chr17	37131873	37134072
chr17	38496722	38498896
chr17	38789726	38792620
chr17	38858732	38861019
chr17	42382619	42384211
chr17	42416264	42419641
chr17	44459040	44460594
chr17	45999092	46001602
chr17	45947855	45949740
chr17	49933688	49934685
chr17	49943348	49944530
chr17	49213079	49215285
chr17	48942224	48944221
chr13	51984656	51986803
chr17	40609798	40611292
chr18	5047293	5049729
chr18	48361748	48363679
chr18	48357559	48361144
chr18	6236992	6238886
chr18	8357855	8359989
chr18	8250479	8252303
chr18	10756021	10758650
chr18	10770874	10773477
chr18	10781901	10783936
chr18	12763623	12765294
chr18	13323264	13325283
chr18	14158481	14160250
chr18	14189962	14192811
chr18	14927673	14930495
chr18	14935840	14937801
chr18	14980432	14982487
chr18	14996280	14997916
chr18	15539602	15541569
chr18	15624184	15625676
chr18	16148383	16150628
chr18	16175871	16177305
chr18	16547869	16549379
chr18	18168985	18170228
chr18	18710303	18712080
chr18	19050179	19052188
chr18	19931221	19934387
chr18	19945655	19947165
chr18	19952897	19958642
chr18	20051229	20057900
chr18	20177714	20180067
chr18	21609703	21611153
chr18	21989064	21990471
chr18	22396897	22401564
chr18	22447871	22449467
chr18	22746399	22747731
chr18	22784953	22786828
chr18	25420334	25423366
chr18	25405055	25406809
chr18	25392281	25394887
chr18	23674586	23675982
chr18	27735900	27737966
chr18	30503231	30505486
chr18	30373886	30375342
chr18	29574157	29576152
chr7	71949243	71950682
chr18	33041285	33043197
chr18	33164492	33166065
chr18	36021538	36023221
chr18	35665443	35668177
chr18	35646547	35648922
chr18	35185015	35186635
chr18	34609699	34613383
chr18	34591530	34594354
chr18	34440060	34442763
chr18	38635484	38637548
chr18	38639374	38640929
chr18	38951774	38953820
chr18	38957932	38960490
chr18	39260744	39262659
chr18	40886460	40888705
chr18	40890466	40892639
chr18	42547618	42549422
chr16	47021330	47022790
chr16	46970195	46971747
chr18	44910696	44912712
chr18	45823723	45825509
chr18	46899889	46902679
chr4	54386040	54387731
chr19	852768	854910
chr19	1240876	1242550
chr19	4246847	4248387
chr19	5852780	5855149
chr19	6374149	6377780
chr19	6911524	6913268
chr19	8082942	8088746
chr19	9114571	9117814
chr19	9570278	9572784
chr19	10086998	10088789
chr19	11571136	11574282
chr9	53816778	53818230
chr19	12774629	12777498
chr19	12617601	12618858
chr19	12632179	12634786
chr19	18871778	18873805
chr19	19282560	19284079
chr19	16772919	16774786
chr19	15407498	15409046
chr19	15394285	15396345
chr19	15305103	15307439
chr19	15296870	15303843
chr19	15268910	15271457
chr19	15186512	15188394
chr19	15046129	15047587
chr19	15027241	15029873
chr19	14892833	14894483
chr19	30661615	30663204
chr19	19950713	19953189
chr19	22165014	22168121
chr19	22403461	22405577
chr19	22475404	22477801
chr19	23046080	23047575
chr19	23053927	23056133
chr19	23096628	23097716
chr19	25719712	25721883
chr19	26424586	26426336
chr19	26796610	26799189
chr19	26845844	26848489
chr19	27313145	27315346
chr19	27795020	27796429
chr19	28379578	28382379
chr19	28441076	28443481
chr19	28648159	28651139
chr19	28726067	28728574
chr19	29937954	29939452
chr19	30946020	30947950
chr19	30988757	30990263
chr19	32260768	32262997
chr19	32553588	32556874
chr19	32569716	32574136
chr19	32770398	32772844
chr19	34581525	34583678
chr19	34600254	34602361
chr19	34657315	34658790
chr19	34984623	34987106
chr19	36567263	36570662
chr19	39585326	39588010
chr19	39648701	39651684
chr19	39664128	39665672
chr19	40366015	40368504
chr19	40373287	40374987
chr19	40837825	40839688
chr19	40942334	40944603
chr19	42586355	42588351
chr19	43217054	43218716
chr19	43792595	43794457
chr19	44744339	44748472
chr19	47566619	47568965
chr19	45771686	45774018
chr19	17404582	17407344
chr16	56604326	56605667
chr10	7291520	7293438
chr2	1464011	1465328
chr2	4317331	4319457
chr2	18905462	18909537
chr2	18759979	18765488
chr2	7023626	7025561
chr5	73165142	73166715
chr2	7156899	7159058
chr2	7552048	7554076
chr2	8026018	8027606
chr2	8118387	8121060
chr2	8179742	8181400
chr2	8223842	8229131
chr2	8324483	8326019
chr2	8546721	8548507
chr2	9997123	9998507
chr2	10803229	10805427
chr2	11566324	11569056
chr2	16654407	16655798
chr2	17590949	17592650
chr2	17937461	17939897
chr2	19103502	19107659
chr2	20672007	20674816
chr2	20836743	20841337
chr2	21769752	21772622
chr2	22274215	22275698
chr2	22618845	22620865
chr2	24173121	24175694
chr2	23329102	23332472
chr2	24399159	24401601
chr2	25932949	25934448
chr2	27033791	27036985
chr2	27258913	27260911
chr2	27293978	27297108
chr2	27371310	27373752
chr2	28049286	28050444
chr2	28272545	28274700
chr2	28705532	28707813
chr2	29535947	29537917
chr2	30252641	30255548
chr2	30289677	30292343
chr2	30463161	30465804
chr2	30480844	30482065
chr2	31843925	31846187
chr2	31888626	31890164
chr2	31902290	31904174
chr2	31909748	31911844
chr2	31937249	31938879
chr2	31965392	31967403
chr2	32444412	32447110
chr2	32782602	32785447
chr2	32802146	32805867
chr2	32823496	32828317
chr2	32860114	32862449
chr2	33034191	33035487
chr2	35148151	35150197
chr2	35520432	35523329
chr2	35483311	35488891
chr2	35477949	35480958
chr2	35643122	35649737
chr2	35806159	35807570
chr2	37029850	37032057
chr2	38218487	38221115
chr2	38334445	38336546
chr2	40073774	40078060
chr2	40554082	40556439
chr2	40254395	40255717
chr2	42221986	42225330
chr2	42751787	42754000
chr2	42871913	42873197
chr2	43414721	43416280
chr2	43574257	43575846
chr2	44368112	44371122
chr2	45420400	45422105
chr2	46776910	46779528
chr2	49560239	49563370
chr2	49419181	49421287
chr2	48089590	48092703
chr5	62043822	62046715
chr24	34593921	34596002
chr2	56894641	56895969
chr2	54092683	54095061
chr2	57389420	57391075
chr2	59505716	59508173
chr20	1612207	1613466
chr20	1741057	1743427
chr20	6931721	6934350
chr1	27691103	27692701
chr20	8626681	8631703
chr20	8809958	8811676
chr20	11023043	11024104
chr13	44755895	44757298
chr20	20170721	20173405
chr20	20552438	20553971
chr20	20905325	20907547
chr20	21105061	21106728
chr20	21529883	21532450
chr20	21690097	21693117
chr20	21735306	21736972
chr20	21737223	21739703
chr20	22164864	22167731
chr20	24315511	24317073
chr20	23023552	23026110
chr20	23026694	23032595
chr20	23110967	23114407
chr20	23447166	23449094
chr20	24084173	24087049
chr20	24578287	24579924
chr20	24656594	24658849
chr20	24983878	24987004
chr20	25341232	25343384
chr20	25705699	25707780
chr20	25981612	25983104
chr20	28119215	28122507
chr20	28256738	28259175
chr20	28288111	28291177
chr20	28325611	28328380
chr20	28641000	28643520
chr20	28687982	28690383
chr20	28772090	28775141
chr20	28843021	28845018
chr20	29874804	29876436
chr20	30114498	30118730
chr20	30127952	30133718
chr20	30830676	30832924
chr20	31044245	31046848
chr20	31054880	31056214
chr20	31056382	31058024
chr20	32214739	32218172
chr20	33413485	33415267
chr20	33415588	33418298
chr20	34372684	34374490
chr20	35256979	35259645
chr20	35576175	35578978
chr20	36992850	36994906
chr20	37059642	37061177
chr20	37116004	37117440
chr20	37171781	37174376
chr20	37235501	37237896
chr20	37942172	37943940
chr20	39024504	39027397
chr20	40357156	40359392
chr20	40471369	40473375
chr20	40858121	40860229
chr20	41152851	41154721
chr20	41316014	41318214
chr20	41340930	41342430
chr20	42500625	42502052
chr20	44212647	44214017
chr20	47353988	47356210
chr20	48981839	48983339
chr20	49091071	49092465
chr20	48819317	48821716
chr20	55330283	55331833
chr21	1016958	1018849
chr21	3650942	3652432
Zv9_NA568	8298	9982
chr21	5093813	5098620
chr21	8963946	8966472
chr21	8726833	8730191
chr21	8696248	8698253
chr21	9269882	9272544
chr21	10163795	10169636
chr16	39467119	39473642
chr16	39487316	39497255
chr16	39269900	39273858
chr21	13333126	13335143
chr21	14899902	14901633
chr21	15401583	15403404
chr21	15411770	15414167
chr21	15632200	15636592
chr21	17230733	17232140
chr21	17660224	17662151
chr21	17896314	17897989
chr21	17914296	17915998
chr21	18214228	18216679
chr21	18256157	18258290
chr21	18385649	18386895
chr21	18811012	18812694
chr21	18955233	18956590
chr21	20944711	20946868
chr21	20980337	20981746
chr18	46834510	46836269
chr21	23704017	23706063
chr21	23901806	23904902
chr21	23989046	23991051
chr21	24373664	24376419
chr21	24381567	24383396
chr21	25546089	25547718
chr21	25730632	25734352
chr21	26469151	26470873
chr21	27711464	27713508
chr21	28453464	28455071
chr21	30337857	30340216
chr21	29902271	29904142
chr21	29894554	29896233
chr21	28811765	28815852
chr21	30882108	30884551
chr21	31152816	31154992
chr21	32931973	32933673
chr21	35054220	35056849
chr21	36330885	36333308
chr21	35672917	35674561
chr21	36463726	36466199
chr21	36534293	36536778
chr21	36547876	36550031
chr21	36661897	36663341
chr21	36785560	36787792
chr21	37032033	37034509
chr21	37699206	37700371
chr21	39790972	39792039
chr21	41051808	41053496
chr22	719038	721176
chr22	3135196	3137342
chr22	3094878	3096211
chr22	4747958	4750165
Zv9_NA735	171691	173903
chr22	7355428	7359359
chr22	8667380	8672791
chr22	11763442	11765052
chr22	10851439	10853715
chr22	14012376	14014451
chr22	14071188	14074386
chr22	16737191	16742350
chr22	16808360	16810034
chr22	17199789	17201891
chr22	17986664	17988414
chr22	18952778	18961207
chr22	18978895	18980406
chr22	19232543	19233703
chr22	19640868	19642019
chr22	20354526	20356741
chr22	22073117	22074813
chr22	22836684	22838528
chr22	26326979	26328358
chr22	27559314	27561634
chr22	32169825	32171708
chr22	32825142	32827878
chr22	33036135	33038706
chr22	33155041	33156958
chr22	34166572	34168372
chr22	35333894	35334997
chr22	38860095	38861613
chr22	38856233	38859933
chr22	40198505	40200255
chr23	654600	656293
chr23	4210315	4212945
chr23	4206921	4209021
chr23	4203860	4206391
chr23	6630407	6632749
chr23	7759076	7761311
chr23	9199566	9201803
chr23	9579890	9582931
chr23	9586639	9592263
chr23	9823877	9825726
chr23	9842903	9848130
chr23	10315088	10318068
chr23	10428169	10429605
chr23	11506721	11509405
chr23	11774950	11776730
chr23	12496350	12498376
chr23	13258389	13260472
chr23	14439698	14441185
chr23	17243083	17244740
chr23	17277399	17280133
chr23	17478113	17480359
chr23	17916438	17918531
chr23	17932845	17942762
chr23	18127744	18130007
chr23	18669835	18671221
chr23	19087375	19088821
chr23	19569812	19572590
chr23	19993038	19995619
chr23	20326140	20327770
chr23	21910614	21913855
chr23	22130821	22133084
chr23	22680884	22686125
chr23	22751639	22753920
chr23	22855422	22857058
chr23	22996586	22999152
chr23	23092407	23095841
chr23	23105790	23107939
chr23	23143309	23144998
chr23	23664855	23666060
chr23	23669532	23671344
chr23	23714533	23717219
chr23	23745632	23748103
chr23	24051964	24053152
chr23	24744022	24746723
chr23	25156781	25158403
chr23	25392608	25395817
chr23	25446561	25449547
chr23	25705780	25707262
chr23	25898637	25900425
chr23	25915892	25921080
chr23	25924953	25927910
chr23	26037749	26040277
chr23	26749450	26752130
chr23	27496801	27499356
chr23	27715082	27716745
chr23	29108606	29110992
chr23	29321838	29324696
chr23	29741167	29743730
chr23	29961498	29963689
chr23	29966396	29968129
chr23	29961327	29963044
chr23	30804122	30806850
chr23	31029433	31032264
chr23	31956987	31958823
chr23	33012648	33014569
chr23	36512438	36515758
chr23	36488853	36490088
chr23	36239312	36240662
chr23	36078711	36080509
chr23	35879752	35881368
chr23	35755446	35758146
chr23	35686980	35689480
chr23	38939389	38943208
chr23	38316897	38319152
chr23	38256106	38257506
chr23	39084908	39088220
chr23	43160123	43161465
chr23	43223125	43224817
chr9	2183879	2186033
chr18	1796366	1798252
chr24	738628	739962
chr24	1390883	1392151
chr24	2391142	2393685
chr24	3212570	3214468
chr5	65347069	65349391
chr24	3840618	3842279
chr24	5330789	5332639
chr24	5512317	5514164
chr24	5533126	5535534
chr24	5967506	5969296
chr24	6005889	6009188
chr24	7423945	7425766
chr24	7893416	7894967
chr24	8439998	8442109
Zv9_NA822	3841	5814
chr24	8474594	8476589
chr24	8569168	8571185
chr24	9037318	9040020
chr24	10518214	10520294
chr24	13086792	13090951
chr24	13294635	13298125
chr24	13565009	13567601
chr24	13937621	13940354
chr24	13956782	13958562
chr24	14058030	14059446
chr24	14396666	14398202
chr24	14412572	14414453
chr24	15499606	15501709
chr24	17583707	17585057
chr24	17720122	17724256
chr24	18165924	18168940
chr24	19430975	19432645
chr24	19991635	19995131
chr24	20275937	20278173
chr24	21495769	21497319
chr24	21635533	21638206
chr24	21887121	21889491
chr24	23704208	23706786
chr24	23708286	23709960
chr24	23711677	23713816
chr24	24004614	24006390
chr24	24188809	24190656
chr24	24226407	24228563
chr24	24370725	24372713
chr24	24935095	24936342
chr24	25370101	25372014
chr24	27173578	27178330
chr24	29709774	29712012
chr9	50307956	50309258
chr24	28550484	28553141
chr24	27471311	27473752
chr24	31310901	31312060
chr24	36830607	36832760
chr24	36846253	36848249
chr24	38181193	38182912
chr24	39451148	39454690
chr24	39470768	39472626
chr24	34774764	34776836
Zv9_scaffold3487	112904	114218
chr25	418560	420833
chr25	397186	399452
Zv9_scaffold3556	3665	5420
chr19	1740663	1742376
chr25	8116488	8117594
chr25	10090264	10092212
chr25	9796963	9798968
chr25	11406236	11408469
chr14	47798758	47799825
chr25	11683571	11685503
chr25	10793281	10796116
chr3	44284183	44287756
chr25	17254013	17257432
chr25	17178651	17180360
chr25	15176256	15178105
chr25	15172163	15175014
chr25	14016605	14018535
chr25	18703483	18705510
chr25	18792437	18796904
chr25	19916061	19918638
chr25	20860718	20862895
chr25	21304885	21307588
chr25	21933853	21936406
chr25	22311981	22313918
chr25	22780039	22782154
chr25	23423588	23425160
chr25	25295749	25297309
chr25	27626941	27629178
chr25	28289468	28292337
chr25	29292468	29294006
chr25	29676776	29678240
chr25	29768348	29770450
chr25	29904016	29906783
chr25	29926082	29927478
chr25	29929250	29930637
chr25	30562135	30563856
chr25	32066425	32067762
chr25	32451626	32452660
chr25	35682961	35684487
chr25	35168689	35170144
chr25	36071901	36073709
chr25	2665799	2667354
chr23	2911237	2913258
chr10	25866723	25868089
chr3	5936092	5938107
chr3	10012663	10015327
chr3	8961636	8963960
chr3	11898697	11900055
chr2	30751382	30754569
chr3	13676214	13678380
chr3	16417388	16419830
chr3	18093256	18095183
chr3	18482564	18484297
chr3	20299348	20301007
chr3	20391292	20393031
chr3	20410064	20411687
chr3	22329601	22334954
chr3	22205353	22208081
chr3	22159536	22161463
chr3	22153080	22155015
chr3	22137103	22139151
chr3	21825711	21828126
chr3	22894310	22898016
chr3	23473635	23474854
chr3	23710808	23713733
chr3	24129654	24131232
chr3	24797733	24801003
chr3	25578145	25579862
chr3	26573791	26576978
chr3	26502032	26504349
chr3	26417620	26419941
chr3	26321404	26323358
chr3	26031503	26033140
chr3	28762823	28765694
chr3	29283202	29285199
chr3	30279568	30281628
chr3	30913699	30915981
chr3	31701368	31703563
chr3	32464615	32468733
chr3	33047916	33049508
chr3	33253458	33256245
chr3	33257014	33261566
chr3	33261876	33263381
chr3	33372952	33375138
chr3	33543622	33545840
chr3	34274281	34276072
chr3	34545525	34548275
chr3	34741942	34743590
chr3	34980713	34982514
chr3	35377557	35379421
chr3	35918978	35920942
chr3	36084265	36087818
chr3	38417835	38419148
chr3	38920795	38924466
chr3	39903463	39905621
chr3	40042063	40043334
chr3	40105044	40107206
chr3	40553777	40555726
chr3	40751384	40754946
chr3	40984534	40986148
chr3	41332368	41334037
chr3	41808612	41810814
chr3	41831415	41834143
chr3	41896532	41899351
chr3	42033880	42036192
chr3	42104980	42106649
chr3	42289587	42292008
chr3	42482516	42484613
chr3	42498809	42500714
chr3	42867510	42870107
chr3	42904989	42907924
Zv9_NA68	48615	49989
chr3	44117559	44121695
chr3	44163141	44164599
chr3	43329989	43333480
chr3	45416695	45419964
chr3	46034572	46036258
chr3	46265878	46270188
chr3	46300433	46302471
chr3	46402512	46403959
chr3	46873748	46875026
chr3	48004001	48006461
chr3	48011961	48013806
chr3	53218136	53219934
chr3	53423077	53425102
chr3	53654928	53658348
chr3	54969299	54971228
chr3	55501074	55505156
chr3	55800309	55801745
chr3	55825729	55828314
chr3	56384668	56387012
chr3	61630389	61631805
chr3	62967405	62969937
chr4	1570935	1573401
chr4	2186838	2188430
chr4	2336825	2338746
chr4	3899771	3901800
chr4	4338287	4339852
chr4	7460210	7461754
chr4	7915492	7918229
chr4	8065980	8069652
chr4	9806738	9808584
chr4	10628657	10631129
chr4	10809394	10811581
chr4	10944782	10946402
chr4	10973076	10975308
chr4	11624585	11626808
chr4	11766331	11767566
chr4	12280281	12284446
chr4	13142822	13146046
Zv9_scaffold3539	10366	12079
Zv9_scaffold3539	117400	118807
chr4	13796937	13799207
chr4	15445206	15446213
chr4	15557420	15559231
chr4	15653424	15655968
chr4	15770063	15771702
chr4	16074193	16076518
chr4	16115774	16119268
chr4	16269006	16271184
chr4	17321119	17322863
chr4	18064022	18065421
chr4	18543837	18547091
chr4	18587351	18590178
chr4	19054286	19056603
chr4	19324264	19332180
chr4	19451355	19454013
chr4	19705830	19707393
chr4	19803961	19805638
chr4	20539882	20541756
chr4	21752203	21754706
chr4	21783402	21785037
chr4	21796482	21800414
chr4	21966192	21969065
chr4	22679399	22680362
chr4	23388497	23390872
chr4	23774370	23778618
chr4	27615190	27618121
chr4	27007200	27008613
chr4	26951031	26954164
Zv9_scaffold3490	164730	166507
chr4	41735046	41736279
chr4	40463738	40466639
chr5	331840	334438
chr5	5914280	5915561
chr5	6499624	6502180
chr5	8874663	8876703
chr5	9410695	9412573
chr5	14962146	14964352
chr5	17729462	17733347
chr5	16767161	16769337
chr5	16304986	16307363
chr5	20115142	20119362
chr5	19782531	19784580
chr5	21239459	21241026
chr5	21404151	21405803
chr5	21473181	21475892
chr5	21477213	21480816
chr5	21488743	21490570
chr5	21694415	21695972
chr5	21878563	21884252
chr5	22160689	22163019
chr5	23819041	23820548
chr5	24052547	24054093
chr5	24098664	24101966
chr5	25050860	25053182
chr5	25122954	25125101
chr5	26018548	26019943
chr5	26387810	26389357
chr5	26766926	26770547
chr5	27212205	27214567
chr5	27746533	27748530
chr5	28874637	28876996
chr5	29155458	29158174
chr5	29380156	29382083
chr5	29731005	29733531
chr5	30692176	30693987
chr5	31040663	31042478
chr5	31366349	31368992
chr5	31413228	31417749
chr5	31604005	31606663
chr5	33081884	33083423
chr5	33103967	33105958
chr5	34009009	34011779
chr5	34267885	34270196
chr5	35035123	35037830
chr5	35163589	35165588
chr5	35426414	35428627
chr5	35445798	35447883
chr5	35656737	35657822
chr5	35688840	35692886
chr5	36151965	36157450
chr5	36248762	36251158
chr5	37045843	37047485
chr5	37386490	37389637
chr5	37990132	37992942
chr5	37957356	37959819
chr5	37932473	37936472
chr5	40379282	40381277
chr5	40929965	40932465
chr5	41368048	41370229
chr5	41644643	41647199
chr5	41744318	41746886
chr5	41778848	41780594
chr5	42238993	42240184
chr5	42259821	42262613
chr5	42985933	42989179
chr5	42998062	42999527
chr5	43165267	43167152
chr5	44247510	44249530
chr5	45283786	45287122
chr5	45289842	45292776
chr5	45803223	45805425
Zv9_scaffold3463	113438	115188
chr5	48291026	48294304
chr5	56229237	56231760
chr5	56218910	56220910
chr5	49784338	49788371
chr5	49935160	49937111
chr5	50047067	50049244
chr5	53418539	53420042
chr5	53528633	53530602
chr5	54922852	54925737
chr5	54803284	54809355
chr5	63287630	63289287
chr5	63489044	63490783
chr5	63761725	63763401
chr5	59355621	59358349
chr5	64208453	64210697
chr5	61608411	61611434
chr5	61365985	61368249
chr5	61113046	61115078
chr5	60360505	60365397
chr5	60023558	60027767
chr5	60003044	60008742
chr5	65678843	65681793
chr5	65946650	65949014
chr5	67645088	67646436
chr5	71415604	71417664
chr16	18009075	18011160
chr6	651599	653581
Zv9_NA887	56891	60597
chr6	976177	981838
chr6	1609673	1611319
chr6	3596144	3597665
chr6	4583156	4584382
chr6	7094297	7097218
chr6	7218326	7220708
chr13	48885418	48886887
chr6	8744171	8745835
chr6	8011796	8013907
chr6	7998067	8002169
chr6	9941763	9943057
chr6	10257267	10258499
chr6	10704281	10706495
chr6	11166190	11168811
chr6	11733070	11736094
chr6	12026510	12032080
chr6	12094970	12097564
chr6	12264965	12267030
chr6	12360202	12362050
chr6	13363743	13366458
chr6	13966908	13969552
chr6	15021378	15023154
chr6	16156143	16158644
chr6	16165427	16170321
chr6	19533914	19536446
chr6	18106102	18110809
chr6	18070075	18072517
chr6	18054320	18057937
chr21	32505088	32506562
chr6	24036491	24039292
chr6	21277169	21279118
chr6	25664359	25666454
chr6	26405991	26407448
chr6	26454908	26458190
chr6	26845796	26847340
chr6	26864061	26866234
chr6	27652861	27654853
chr6	28195563	28197546
chr6	28378727	28379885
chr6	28946680	28949180
chr6	28967152	28972550
chr6	28990725	28993104
chr6	29432229	29433908
chr6	29441582	29443931
chr6	29456859	29458449
chr6	30572440	30574531
chr6	30623927	30626380
chr6	30910535	30913194
chr6	30946439	30949311
chr6	31215966	31218669
chr6	31255779	31258142
chr6	31426357	31427438
chr6	31589860	31592230
chr6	31688343	31690342
chr6	31818235	31825744
chr6	31952934	31954511
chr9	16839631	16844924
chr2	19572830	19576209
chr2	20024742	20026376
chr2	20137492	20139821
chr6	33717708	33720473
chr6	32748654	32751147
chr6	32744451	32746569
chr6	32448129	32449837
chr6	33971182	33972841
chr6	34451410	34452677
chr6	38522707	38525918
chr6	39205838	39207382
chr6	41626234	41627813
chr6	43210650	43212184
chr6	42673274	42676623
chr6	42790024	42792358
chr6	42952328	42954560
chr6	44034028	44036191
chr6	44082883	44085159
chr6	44235580	44237849
chr6	44293224	44295018
chr6	44308660	44311176
chr6	45592735	45594522
chr6	45847320	45852676
chr6	47382226	47386175
chr6	49886611	49888165
chr6	50392826	50394139
chr6	51180863	51183022
chr6	51258382	51260909
chr6	52926543	52929085
chr6	52965489	52966900
chr6	53777844	53779654
chr6	57627423	57629360
chr6	58543668	58546331
chr7	5290755	5293281
chr7	8268404	8270331
chr7	10721938	10724093
chr7	11531677	11532913
chr7	14349860	14351881
chr7	16382731	16384739
chr7	14950253	14955599
chr7	14956158	14959206
chr7	17389064	17390424
chr7	17596266	17597487
chr7	17922482	17924764
chr7	18007582	18009166
chr7	19739787	19741016
chr7	21383029	21386499
chr7	21425708	21427914
chr7	22785272	22786656
chr7	23037973	23039496
chr7	23822674	23824312
chr7	25875028	25876846
chr7	26075930	26078157
chr7	26393649	26396124
chr7	26473061	26474784
chr7	26772559	26773997
chr7	26786474	26789201
chr7	26970984	26972710
chr7	27701547	27703688
chr7	27779785	27784933
chr7	27786546	27788042
chr7	28238406	28240105
chr7	28719589	28722434
chr7	30136947	30140215
chr7	30775548	30778129
chr7	30896206	30898251
chr7	31229880	31231692
chr7	31647205	31649597
chr7	31651517	31653639
chr7	31764478	31766940
chr7	32161127	32163010
chr7	32319260	32323345
chr7	32597739	32601401
chr7	32702227	32704495
chr7	32965657	32967818
chr7	34347385	34351534
chr7	34715678	34717610
chr7	34927036	34929380
chr7	35267741	35269390
chr7	36395974	36399275
chr7	36926756	36928946
chr7	38132388	38134098
chr7	38803416	38804807
chr7	39206990	39209659
chr7	39299752	39303683
chr7	39306399	39308422
chr7	39995919	39998263
chr7	41716596	41719466
chr7	41813393	41815175
chr7	42009717	42013043
chr7	42122253	42124634
chr7	47407582	47409659
chr7	47404967	47406695
chr7	47065866	47068224
chr7	43069528	43070940
chr7	43075380	43080298
chr7	43257632	43260472
chr7	43325319	43328318
chr7	43519667	43521464
chr7	44598614	44601567
chr7	44304127	44305767
chr7	43786202	43791982
chr7	43770270	43773262
chr7	43674152	43676756
chr7	46932797	46936866
chr7	44996640	44998725
chr7	44988495	44991050
chr7	47582206	47583905
chr7	47817909	47819856
chr7	49178789	49180675
chr7	49283543	49286592
chr7	50039136	50042771
chr7	50333046	50334636
chr7	50695450	50697053
chr7	50739760	50742494
chr7	50967744	50969461
chr7	51000237	51002181
chr7	51661791	51663529
chr7	52060015	52062416
chr7	44805912	44808053
chr7	44676642	44679090
chr7	44661876	44664835
chr7	52269948	52272252
chr7	53112222	53117173
chr7	53135975	53137897
chr7	55126054	55128101
chr7	55881277	55884486
chr7	55913832	55916955
chr7	55935397	55936487
chr7	55947729	55954283
chr7	55956849	55958766
chr7	55967298	55969905
chr7	55989939	55992423
chr7	56002937	56006288
chr7	56770914	56772910
chr7	57107952	57110578
chr7	57186410	57188926
chr7	57338698	57341863
chr7	57466148	57468335
chr7	57559704	57562295
chr7	57636156	57639884
chr7	58014010	58017179
chr7	59124940	59126423
chr7	64414697	64416315
chr7	65862096	65864667
chr7	61899210	61901806
chr7	66545814	66547733
chr7	68178371	68180451
chr7	70436270	70437886
chr7	74828719	74829671
chr7	74120096	74122795
chr7	74670514	74672740
chr7	75451555	75453809
chr8	8998287	9000179
chr8	9938599	9940358
chr8	10344477	10345885
chr8	12076579	12077588
chr8	13342702	13344854
chr8	14160104	14162060
chr8	14958520	14959942
chr8	15536935	15539127
chr8	15688567	15691437
chr8	16873108	16874741
chr8	16877584	16882820
chr8	17456674	17459024
chr8	18015184	18019317
chr8	19151489	19156321
chr8	19671703	19674086
chr8	20634482	20637974
chr8	21307963	21310414
chr8	22223896	22225770
chr8	24096574	24098922
chr8	24120858	24122299
chr8	25034136	25036929
chr8	25991568	25993786
chr8	26244769	26248161
chr8	27193829	27196254
chr8	27228457	27229516
chr8	27674873	27680908
chr8	27693098	27696042
chr8	29524446	29527305
chr8	29608958	29611714
chr8	29628139	29629743
chr8	30014409	30015847
chr8	30820848	30824540
chr8	31852420	31854451
chr8	32143122	32145455
chr8	32700801	32702480
chr8	33373856	33376067
chr8	33466543	33468735
chr8	33558952	33563986
chr8	34899514	34901614
chr8	39455140	39460036
chr8	36781728	36783982
chr8	41506970	41509779
chr8	41922290	41924148
chr8	45287343	45289115
chr8	45139375	45141387
chr8	44793571	44795106
chr8	46887332	46891438
chr8	47632786	47634937
chr8	49060217	49062051
chr8	50079518	50080869
chr8	51577797	51579637
chr8	53538190	53540443
chr8	54005985	54010449
chr8	54145550	54147341
chr9	275278	277291
chr10	5967015	5968256
chr10	5884438	5886912
chr10	5816201	5817954
chr9	623930	625391
chr9	3353310	3355110
chr9	4671477	4673102
chr9	4636223	4638533
chr9	6019677	6021856
chr9	6811759	6813661
chr9	8391196	8393580
chr9	9412939	9415024
chr9	9882175	9885814
chr9	10302486	10304949
chr9	10393082	10397683
chr9	10873977	10876171
chr9	10878892	10881888
chr9	10882924	10888110
chr9	10904300	10905670
chr9	12301293	12302774
chr9	12636504	12638250
chr9	13067155	13068709
chr9	13092658	13094749
chr9	13743882	13746422
chr9	14533371	14536704
chr9	14707119	14709427
chr9	14747656	14750642
chr9	14877869	14888264
chr9	18221761	18224111
chr9	16366009	16371705
chr9	18529764	18531264
chr9	18912771	18914143
chr9	19158709	19160754
chr9	19415094	19416639
chr9	19418494	19419917
chr9	21381324	21384071
chr9	22251995	22255552
chr9	22674543	22676012
chr9	23594057	23595824
chr9	23596177	23598887
chr9	24126061	24127564
chr9	24240113	24242165
chr9	24381203	24384872
chr9	24487165	24490719
chr9	26422770	26425359
chr9	26427989	26429343
chr9	26501426	26503229
chr9	26758659	26761121
chr9	26762971	26764739
chr9	26764889	26767325
chr9	26842734	26845408
chr9	27111797	27115410
chr9	27191056	27192907
chr9	27438142	27440316
chr9	27751578	27753271
Zv9_scaffold3455	393567	397956
Zv9_scaffold3455	406600	407943
chr9	28146411	28148500
chr9	28328727	28330615
chr9	28968547	28971614
chr9	29382044	29383431
chr9	29547036	29549673
chr9	30450500	30453198
chr9	30920252	30921712
chr9	31860599	31863024
chr9	32338824	32340922
chr9	32505936	32509225
chr9	33558480	33560620
chr9	33760419	33761928
chr9	34612441	34615624
chr9	35584874	35587006
chr9	35633743	35637109
chr9	37340472	37346030
chr9	37428883	37431802
chr9	37436299	37440083
chr9	38095397	38097078
chr9	38254039	38256614
chr9	38455753	38458294
chr9	38736011	38738054
chr9	39883097	39884518
chr9	40426801	40428764
chr9	40363598	40366830
chr9	40642020	40643904
chr9	40716332	40718975
chr9	41647219	41651425
chr9	41725843	41729697
chr9	42429874	42432218
chr9	42525693	42527176
chr9	42687551	42689755
chr9	42723368	42726642
chr9	42736444	42738239
chr9	42939754	42940951
chr9	43167063	43170471
chr9	43171710	43176367
chr9	43504640	43506256
chr9	43783785	43788151
chr9	43954890	43957457
chr9	44148120	44151787
chr9	44899253	44901241
chr9	45306845	45309024
chr9	46389265	46393664
chr9	47877673	47879030
chr9	55106214	55108577
chr9	47628851	47632318
chr9	47663452	47665188
chr9	49423194	49425005

## Sheet: Table_S20
PDREs_Zv9_80%epi
chr10	22125464	22126703
chr10	22124794	22125207
chr10	30052546	30053304
chr2	39827624	39828840
chr2	39824390	39825555
chr2	39820720	39823217
chr2	39820113	39820494
chr2	39818929	39819687
chr2	39815165	39816741
chr2	39811166	39813442
chr2	39808683	39810355
chr2	39793582	39795455
chr8	45753756	45756335
chr12	44752793	44753386
chr5	49468341	49468761
chr5	66119593	66120773
chr11	32467960	32468459
chr11	32464291	32464641
chr7	10319541	10320380
chr7	10388719	10389543
chr24	34805359	34806413
chr12	42822476	42823218
chr25	33924708	33925276
chr25	34023252	34023716
chr13	5835817	5836930
chr13	5829553	5830190
chr13	5826726	5828153
chr13	5822926	5823698
chr13	5816448	5817592
chr13	5813921	5815253
chr19	44709560	44712803
chr19	44714887	44716905
chr3	43704004	43705107
Zv9_NA494	8876	10156
chr3	56405350	56406574
chr21	726891	727253
chr9	5259943	5260359
chr7	17716928	17717935
chr15	40735535	40736676
chr15	40741239	40742179
chr23	37093559	37094071
chr23	37095564	37096939
chr20	50110932	50111567
chr13	44806517	44806911
chr13	44813166	44813480
chr19	2232559	2233505
chr19	2246052	2246765
chr7	72369335	72369640
chr7	72362526	72362924
chr7	60044870	60045667
chr22	38747037	38747486
chr22	38759635	38760588
chr22	38762231	38762940
chr22	38769106	38770148
chr19	42532445	42533592
chr19	42562638	42563230
chr13	42715735	42716149
chr16	40210101	40210608
chr14	1408924	1409287
chr18	4889406	4890887
chr14	41005085	41006013
chr20	45306247	45307024
chr11	40684816	40685894
chr11	40676107	40676830
chr11	40667565	40668376
Zv9_NA484	10752	11134
chr5	34124614	34126709
chr5	34130895	34131628
chr5	34133284	34135265
chr5	34136238	34137130
chr18	43590424	43590772
chr1	2797667	2798790
chr12	41013350	41013739
chr19	11869485	11870668
chr20	28428960	28429653
chr19	23168858	23169331
chr21	32469831	32470552
chr16	46362950	46363779
Zv9_NA479	35164	35811
chr19	1101420	1102227
chr10	17370709	17371974
chr10	17395586	17396708
chr11	44315258	44315698
chr11	44305267	44305986
chr14	37714294	37715513
chr1	52066557	52067478
chr3	33047984	33048596
chr9	50404938	50405693
chr7	29248186	29250717
chr7	29245463	29246594
chr7	29241863	29243485
chr7	29239158	29240469
chr21	39976952	39977557
chr21	39996759	39997151
chr21	40000394	40000702
chr12	20796609	20797627
Zv9_NA471	309	743
chr7	75875947	75877123
chr23	5971704	5972309
chr22	312123	312651
chr2	51253918	51254504
chr2	46143408	46143780
chr24	11690886	11691267
chr24	35554988	35555960
chr24	35560808	35561927
chr24	35562895	35563509
chr24	35570890	35571430
chr24	35594329	35595092
chr24	35602218	35603150
chr24	35609700	35610988
chr24	35614484	35616121
chr24	35617344	35618092
chr9	40928748	40929642
chr9	40930337	40930852
chr9	40850372	40850925
chr11	40631807	40632470
chr5	50682999	50684358
chr17	9569334	9570499
chr17	9536210	9537560
chr17	9456679	9458475
chr8	36362627	36363825
chr13	53029822	53030489
chr5	59703204	59704216
chr11	2064788	2065282
chr11	2085445	2086107
chr2	19698249	19698858
chr11	44485523	44486187
chr2	47027355	47027986
chr2	47063225	47063900
chr9	41023557	41025528
chr9	41079732	41081588
chr9	41081798	41082166
chr18	25852704	25853025
chr22	27001628	27001985
chr16	52225828	52227072
chr20	45217626	45218676
chr18	1734077	1735122
chr18	1740515	1740932
chr11	46562244	46563169
chr14	3753353	3753798
chr22	38658369	38659301
chr11	21225640	21226089
chr11	10320556	10322134
chr22	1166479	1167340
chr22	25553960	25555042
chr1	32226674	32227354
chr13	53836934	53837385
chr15	45368128	45369225
chr15	45377766	45378550
chr15	45379926	45383292
chr23	5160667	5161077
chr8	1424252	1424792
chr8	1418295	1418585
chr8	1415232	1415801
chr8	1413757	1414157
chr8	1412679	1413469
chr4	6512792	6514017
chr4	6508721	6509888
chr4	6471628	6471968
Zv9_NA921	5808	6045
Zv9_NA46	3106	3838
chr25	1883703	1884244
chr3	48757138	48759324
chr3	48755342	48756579
chr17	49978450	49979293
chr16	47297180	47297763
chr21	42642462	42645240
chr21	43187998	43188816
chr21	43184157	43184969
chr23	39008007	39009156
chr23	39003832	39006041
chr23	38996133	38996510
chr1	36556220	36556858
chr7	72690081	72690353
chr8	10997255	10998280
Zv9_NA181	7628	8037
chr11	34997073	34997651
chr16	58674610	58675178
chr5	74942695	74943230
Zv9_NA811	24388	25152
Zv9_NA663	26549	27365
Zv9_NA663	32088	32403
chr2	605948	606464
chr2	654723	656614
chr2	661482	662944
chr2	663609	665230
chr25	34318810	34319322
chr25	34407278	34407652
chr25	34426293	34426545
chr25	34426812	34427260
chr7	40702092	40703046
chr7	40715817	40716235
chr7	40743050	40743285
chr7	40762398	40762877
Zv9_NA550	2110	4128
chr14	29733576	29733970
chr8	50572943	50574011
chr19	47026684	47027273
Zv9_scaffold3500	67142	67574
Zv9_scaffold3500	52334	53879
Zv9_scaffold3500	45400	47336
Zv9_scaffold3500	39417	40779
Zv9_scaffold3500	34671	35426
Zv9_scaffold3500	29551	29839
Zv9_scaffold3500	4499	5119
chr20	45712606	45713209
chr7	72875185	72875800
chr7	72870770	72873332
chr7	72865447	72865919
chr7	72861844	72862846
chr7	72860119	72860799
chr4	2323059	2324124
chr17	50202957	50203407
chr17	50165294	50166802
chr2	41658595	41659715
chr12	3181619	3182326
chr9	41049841	41050198
chr13	21204337	21205239
chr11	6444396	6445045
chr11	6442720	6443639
chr16	53899876	53900925
chr16	53919411	53919958
Zv9_NA595	12253	13057
chr17	48501780	48502415
chr8	8477774	8478857
chr8	8464727	8465253
chr1	29737744	29738390
chr3	61045593	61046934
chr16	50329558	50329840
chr1	4793851	4794624
chr1	4796421	4797394
chr1	4837981	4840052
chr1	4847618	4848219
chr1	4851578	4852136
chr8	10881534	10881865
chr16	55381480	55382070
chr15	6250307	6251182
chr15	6275091	6275851
chr21	3675864	3677093
chr23	38967786	38968397
chr23	38962342	38964035
chr23	38971695	38972082
chr23	38976934	38977627
chr23	38978140	38978811
chr23	38979857	38980590
chr23	38984416	38984939
chr14	1070585	1071492
chr14	1090536	1091130
chr14	1097819	1098592
chr24	43304970	43306026
chr10	34336958	34337744
chr10	34284225	34285008
chr21	800162	800925
chr15	45305746	45306273
chr15	45313903	45314718
chr15	45314981	45316008
chr15	45318877	45319454
chr15	45025731	45025955
chr15	45023268	45024525
chr15	45017197	45017559
chr5	62551885	62552343
chr8	49565208	49565707
chr8	50163843	50165140
chr20	3844229	3844740
chr24	38295302	38295952
chr23	37785087	37785484
chr15	41458251	41458590
chr4	4552674	4553325
chr4	4555046	4556292
chr11	24609503	24611226
chr11	24614481	24615209
chr12	45465260	45465654
chr1	35159743	35160147
chr2	22036627	22036978
chr2	41434722	41436169
chr2	41432062	41433682
chr2	41429854	41431448
chr2	41424926	41425977
chr2	41422009	41424391
chr2	41418285	41421764
chr11	6494727	6496166
Zv9_NA722	193563	193905
chr5	5785756	5786507
chr19	30146769	30147195
chr19	30133629	30134250
chr12	49151741	49152707
chr21	13178665	13178988
chr21	13175028	13175860
Zv9_NA101	5708	6175
Zv9_scaffold3497	21500	22497
chr2	34471942	34472917
Zv9_NA808	4388	4748
chr15	42199748	42200755
chr15	47214850	47216008
chr6	2116548	2116949
chr23	1140507	1141112
Zv9_NA963	18602	19112
chr21	25230444	25231342
chr13	52228411	52229377
chr17	7059819	7060353
chr9	2438992	2439503
chr9	2436341	2436717
chr9	2435469	2435830
chr9	2421532	2422143
Zv9_NA761	44412	44863
chr11	44240808	44241149
chr15	9560734	9561132
chr6	55687484	55687871
chr6	55684020	55684454
chr6	55677657	55678248
chr14	1150223	1150739
Zv9_NA372	194982	196357
Zv9_NA372	204629	204962
Zv9_NA461	53612	54447
chr6	56294589	56296417
chr6	56281619	56282492
chr6	56271462	56272880
chr6	56278290	56278500
chr8	1403952	1404507
chr7	26643429	26644118
Zv9_NA718	1953	2391
chr17	53557119	53558055
chr14	7005307	7005794
chr10	42925080	42925645
chr17	3821260	3821566
Zv9_NA810	29129	29671
chr23	4507129	4508521
chr20	44343262	44343889
chr20	44350687	44351675
chr20	44806006	44806538
chr20	44864214	44866353
chr20	45134184	45134563
chr20	45138473	45139329
chr20	45168034	45170003
chr20	45184215	45185212
chr23	41314786	41315156
chr23	41307070	41307637
chr23	41303213	41303498
chr23	171392	172703
chr23	701848	703321
chr23	708608	709394
chr8	43864868	43865227
chr22	12464315	12465041
chr22	12454897	12456388
chr22	5106223	5106670
Zv9_NA138	1127	2505
chr20	53337244	53337619
chr14	48207940	48208516
chr12	44993071	44993579
chr12	44957460	44958511
chr22	15214022	15214439
chr22	15211437	15211903
chr22	15209718	15210869
chr22	15204515	15204911
chr22	15202897	15203515
chr22	15182821	15183175
Zv9_NA22	57698	59028
Zv9_NA22	55126	55628
chr22	15261108	15261704
chr22	15268779	15269329
chr22	15306355	15306757
chr9	48836179	48836546
chr16	55910053	55911517
chr16	55912865	55913618
chr5	66638653	66640481
chr5	66636263	66636917
chr5	66821223	66821944
chr5	66842120	66842664
chr5	66847428	66848842
chr24	26596142	26598443
Zv9_NA41	20089	20519
Zv9_NA41	44793	45324
Zv9_NA41	69442	70234
chr22	34443096	34444220
Zv9_NA722	55754	56230
chr4	60018103	60018916
chr6	4462186	4462932
chr7	77245855	77246228
chr21	8124811	8125339
chr9	50333058	50333711
chr9	50344897	50345270
chr9	50346617	50346916
chr9	30782009	30783001
chr1	30875156	30875851
chr18	39495718	39496575
chr18	39498881	39499275
chr18	39506632	39506989
chr18	39566670	39566993
chr13	49438629	49439611
chr13	49456686	49457012
chr13	49468324	49469349
chr13	49471881	49473095
chr22	5159121	5159498
chr22	5172069	5172808
chr24	43089067	43089408
chr22	20643198	20643589
chr22	20645922	20646337
chr22	20646605	20649179
chr22	20663488	20664739
chr22	20673137	20673951
chr22	20674755	20675143
chr2	2651765	2652307
chr12	43407528	43408007
chr19	48145244	48146326
chr19	48154168	48154607
chr24	36403956	36405521
chr24	36407635	36409205
chr24	36419582	36420135
chr24	36553976	36555093
chr24	36586102	36587162
chr24	36611922	36613024
chr24	36681992	36682471
chr7	75357401	75358014
chr15	7257074	7259431
chr3	13835626	13836982
chr3	13839788	13840193
chr3	13852966	13853540
chr3	13881471	13881831
Zv9_scaffold3556	58109	58465
Zv9_scaffold3556	31141	32208
chr3	11782609	11782924
chr2	13699173	13700163
chr3	13487036	13488541
chr3	13485315	13486746
chr14	613759	614296
chr14	620632	620985
chr12	19863682	19865184
chr9	47747952	47748450
chr9	47265862	47266519
chr21	40669580	40669982
chr21	433972	434727
chr6	58993037	58993709
chr20	15026749	15027592
chr18	41387012	41387387
chr18	41410551	41411852
chr18	41395029	41396566
chr18	41445858	41447714
chr18	41452189	41452844
chr18	41455098	41455888
chr18	41459811	41460649
chr18	41460862	41461837
chr18	41462070	41464633
chr18	41465131	41468639
chr18	41471974	41473091
chr18	41476838	41478883
chr18	41484090	41485359
chr18	41485817	41488256
chr18	41489384	41490562
chr18	41493831	41496608
chr18	41499486	41500218
chr18	41514854	41515800
chr18	41530205	41531830
chr18	41551440	41552506
chr18	41552891	41555096
chr5	72270067	72270404
Zv9_scaffold3535	279862	280228
Zv9_scaffold3535	281492	283037
Zv9_scaffold3535	285150	285502
Zv9_NA79	94712	95538
Zv9_NA79	89387	90125
chr19	7356749	7357171
Zv9_NA859	6081	7089
Zv9_NA859	8623	9775
Zv9_NA859	10741	11215
chr4	60168300	60169011
chr7	11390009	11391708
chr7	11355140	11355514
chr18	1417885	1418480
chr9	5551228	5551757
chr9	5541342	5542591
chr13	40113081	40113997
chr6	53591727	53592446
chr6	53629602	53630387
chr18	2892266	2892612
chr18	2894447	2895707
chr4	24120110	24120624
chr4	24119242	24119500
chr25	5418513	5419215
chr16	50515784	50516391
chr24	8279006	8279741
chr4	7941378	7941720
chr18	11151579	11152786
chr18	11161002	11161562
chr18	11183371	11183765
chr15	3173238	3175219
chr15	3180125	3180593
chr15	3197593	3198568
chr24	35714743	35715010
chr24	35659820	35660207
chr24	35687372	35688108
chr19	4624677	4625263
chr19	4645493	4645867
chr5	59765590	59766636
chr20	3464719	3465599
chr24	20373218	20373583
chr24	21914770	21916227
chr13	2044341	2044725
chr20	4339409	4340871
chr20	4285561	4286806
chr20	4313522	4313801
chr20	4329906	4331361
chr20	4333148	4333846
chr20	4349734	4350123
chr20	4361224	4363145
chr20	4364496	4365941
chr20	4368889	4369552
chr20	4383065	4384095
chr20	4385854	4386772
Zv9_NA732	119632	120129
chr22	5271121	5271855
chr22	5251629	5255475
chr22	5240032	5240740
chr22	5215388	5216407
chr10	3983732	3984158
chr1	5977457	5977846
chr7	37974368	37974888
Zv9_NA837	1437	1807
chr7	68239062	68240324
chr7	68250368	68252470
chr7	75597693	75598511
chr7	75629744	75630129
chr7	75664012	75665186
chr10	12430904	12432902
chr10	12427906	12428726
chr10	12421860	12422999
chr10	12456290	12456896
chr10	12482243	12482852
chr10	12488686	12489294
chr10	12492276	12493466
chr10	12511460	12511793
chr22	3270150	3271087
chr14	45546754	45547347
chr6	57743661	57744653
Zv9_NA345	24147	25014
Zv9_NA345	28155	29154
Zv9_NA345	30968	31546
Zv9_NA345	61327	62048
Zv9_NA345	63466	64689
Zv9_NA345	69549	69985
Zv9_NA345	75967	76854
Zv9_NA345	78384	80149
chr23	34774647	34775559
chr23	34780340	34781710
chr23	34787281	34789757
chr23	34844178	34844478
chr8	6381569	6382129
chr23	28277305	28278027
chr3	10842496	10842892
chr2	16520572	16522593
chr3	31372078	31372401
chr10	45699660	45700129
chr17	13381831	13382803
chr18	48293956	48296398
chr18	31324084	31324511
chr18	31319161	31320640
chr18	31315912	31316282
chr1	4047548	4048046
chr25	5504514	5505511
chr25	5505814	5506182
chr14	17228864	17230050
chr16	8354943	8356771
chr16	8349975	8352283
chr16	8344700	8345515
chr16	7471993	7473681
chr16	7468967	7469464
chr3	6038734	6039118
chr3	6037202	6038478
chr11	44855217	44855637
chr11	44853336	44853753
chr11	44840154	44840789
Zv9_NA17	48009	48389
Zv9_NA335	9176	9631
chr13	7364791	7365449
chr13	7315267	7315583
chr13	7307749	7310701
chr13	7302810	7305761
chr13	7297552	7299218
chr13	7293775	7295044
chr13	7283032	7283872
chr13	7264977	7266563
chr19	35420605	35421959
chr7	44654115	44654520
chr3	10965404	10965854
chr5	74593521	74593962
chr17	21033345	21034014
chr17	21023795	21024530
chr18	48218927	48219302
chr18	48221135	48221673
chr7	13722168	13722850
Zv9_NA403	106986	107411
Zv9_NA403	21465	22798
Zv9_NA403	17272	18403
chr23	41450251	41450682
chr23	41465965	41466812
chr23	41468382	41468864
chr15	3752851	3754957
chr15	3688106	3688526
chr15	3720367	3721294
chr15	3728484	3728978
Zv9_NA908	124359	125150
chr11	40904955	40905741
chr11	40902770	40903716
Zv9_NA387	24600	25099
chr14	4043591	4044300
chr12	9032449	9033330
Zv9_NA675	106884	107322
Zv9_NA675	65405	66062
chr5	12531816	12533186
chr8	45609357	45612047
chr13	2789027	2790223
chr3	6311571	6312425
Zv9_NA736	16725	17168
chr25	2882489	2883462
chr25	2840597	2841066
chr20	45820481	45821877
chr20	45823131	45823608
chr8	2912586	2914015
chr9	5685403	5685992
chr12	8951973	8952584
chr12	8945390	8946640
chr16	56032476	56032988
chr16	55981666	55982448
chr15	5893873	5895050
chr23	21132849	21134161
chr23	21143010	21143358
chr23	21147118	21147859
chr23	21149987	21150496
chr23	21156662	21157029
chr23	21157299	21161165
chr23	21163419	21164552
chr23	21165428	21167418
chr23	21176095	21176951
chr23	21178332	21181193
chr23	21186483	21187626
chr23	21189793	21190630
chr23	21118616	21119335
chr18	46896962	46897502
chr18	46879710	46880171
chr18	46876534	46878919
chr18	46874799	46875130
chr18	46870709	46872313
chr21	3083639	3084487
chr4	23558599	23559547
chr4	23577018	23578078
chr4	23581019	23581424
chr15	47161717	47162094
chr15	47161211	47161511
Zv9_NA915	59833	60250
chr4	59102639	59104286
chr13	44804358	44804983
Zv9_scaffold3551	244761	247065
Zv9_scaffold3551	240007	240977
chr17	36220482	36220718
chr17	36223981	36225953
chr6	50190503	50191328
Zv9_scaffold3463	11216	12548
Zv9_scaffold3463	51756	52033
chr7	73247575	73249000
chr7	73250219	73251028
chr7	73260424	73261629
chr7	73265966	73267347
chr2	16491544	16492490
chr2	16481964	16482734
chr9	45622490	45622931
chr25	10321655	10321864
chr25	10352429	10352819
chr18	43570055	43570943
chr18	43571823	43572919
chr18	43583757	43584202
chr8	8230847	8231349
chr8	2162450	2163107
chr10	16854613	16855673
chr10	16761516	16761811
chr10	17259625	17260126
chr24	43849003	43849357
chr10	4115321	4116442
chr5	74164878	74165312
chr14	569064	570586
chr22	40396378	40397252
Zv9_NA815	16687	20724
chr22	34339827	34340520
chr10	43620944	43621852
Zv9_NA227	87178	87685
Zv9_NA227	83274	83655
Zv9_NA227	75341	76190
Zv9_NA545	191069	191967
chr12	44915116	44917980
chr5	5125078	5125582
chr5	4508939	4509451
chr5	4500528	4501077
chr2	58080509	58081052
chr6	53520070	53521611
chr7	73163400	73163841
chr7	73147134	73148045
chr7	73138669	73139964
chr7	73129026	73131281
chr11	44276068	44276795
chr11	7240180	7241335
chr3	61131875	61133826
chr24	2007231	2007655
chr1	36975205	36975909
chr14	27277530	27280071
chr14	27285733	27287062
chr14	27295328	27296588
chr14	27302468	27304152
chr14	27309038	27309622
chr14	27344250	27345414
chr14	27349373	27350840
chr25	29924974	29925291
Zv9_NA227	3735	4711
chr1	12437208	12437591
chr23	2674960	2675689
Zv9_NA503	197595	198346
Zv9_NA122	4848	5584
chr7	9991793	9992770
chr21	28870672	28871073
chr12	44750287	44751172
chr2	2648086	2648807
chr24	37157353	37157738
chr12	46857705	46858105
chr8	636179	636903
chr6	1855621	1856986
chr23	38405371	38405774
chr2	41866950	41868592
chr2	41865624	41866184
chr2	41853956	41855317
chr15	3105351	3105626
Zv9_NA356	19171	19637
chr5	62819939	62822881
chr5	62828955	62829720
chr23	37747915	37750056
chr20	4403382	4405381
chr20	4405765	4406736
chr20	4411178	4411631
Zv9_NA549	15820	17544
chr16	55118635	55119390
chr16	55123281	55124153
chr3	10766087	10767136
chr3	10739785	10740268
chr18	23467889	23468987
chr18	23456858	23458616
chr18	23444829	23446472
chr18	23443006	23443854
chr18	23438015	23438912
chr18	23436928	23437800
chr18	23432928	23433474
chr18	23377421	23378330
chr24	30028559	30029027
chr2	51572444	51573914
chr16	7479190	7479802
chr13	2309699	2310038
chr10	40122100	40122505
chr12	2444206	2444683
chr7	9953383	9954084
chr10	3794738	3795166
chr10	3727036	3727742
chr23	37770559	37772735
chr23	37766572	37767413
chr23	44483636	44484415
chr23	44480505	44482526
chr19	2289561	2290292
chr12	46127379	46127730
chr14	47590266	47591405
chr14	47592264	47592631
chr25	449632	449965
chr21	42410228	42410944
Zv9_NA470	446	737
chr21	1646873	1647617
chr20	45580090	45580510
chr21	41131273	41131631
chr16	950202	950859
chr16	937788	940107
chr24	43310923	43311277
chr24	43234351	43234797
Zv9_NA372	85932	87272
Zv9_NA372	82312	83312
Zv9_NA372	51165	51599
Zv9_NA372	41935	42710
chr12	8677502	8677892
chr12	8777390	8778735
chr12	8783769	8785386
chr12	8888325	8889483
chr12	8897945	8898870
chr20	4621426	4621844
chr20	4609387	4610124
chr20	4602203	4603552
chr20	4599129	4599518
chr20	4586661	4587809
chr20	4584705	4586024
chr20	4577313	4578199
chr20	4492508	4493095
chr20	4488888	4489581
chr20	4485585	4488398
chr20	4455789	4456547
chr16	32415880	32417218
chr16	32410617	32411682
chr16	32404559	32405586
chr7	21401169	21401434
chr18	32147474	32148248
chr2	47395227	47397801
chr14	7966730	7967138
chr25	11691020	11692258
Zv9_NA73	23207	25027
chr5	71191980	71192469
chr11	4980242	4981894
chr8	39112701	39113158
chr8	39110000	39110663
chr8	39103973	39105289
chr14	37801045	37802251
chr14	37811086	37811754
chr12	7002616	7002877
chr20	19701737	19702163
Zv9_NA591	2485	2804
Zv9_NA591	4733	5181
chr1	54252770	54253436
chr8	52222049	52222500
chr8	52902119	52903178
chr8	52903655	52904481
chr8	52918360	52918989
chr8	52933611	52934725
chr15	45656873	45657240
chr11	44200889	44201482
chr11	44184073	44184410
Zv9_scaffold3512	22690	23127
Zv9_scaffold3512	36755	37712
Zv9_scaffold3512	39384	40828
Zv9_scaffold3512	54981	56467
Zv9_scaffold3512	56773	57408
Zv9_scaffold3512	57963	59095
Zv9_scaffold3512	60351	61918
Zv9_scaffold3512	63206	63531
Zv9_scaffold3512	66654	67379
Zv9_scaffold3512	69848	71006
Zv9_scaffold3512	81434	85523
Zv9_scaffold3512	85724	86537
chr7	682532	683117
Zv9_NA243	38627	39232
Zv9_NA324	8736	9591
chr15	11326369	11327031
chr9	52784387	52785157
chr9	52786716	52787353
Zv9_scaffold3485	16161	16731
Zv9_scaffold3485	21359	22176
Zv9_scaffold3485	25955	26400
Zv9_scaffold3485	104131	104660
chr2	54368194	54368887
chr20	53986601	53988267
chr9	55414473	55414838
chr9	55512427	55513175
chr8	3492798	3493161
chr9	52178330	52178744
chr9	52143497	52144047
chr16	14356113	14356456
chr16	14336815	14337207
chr16	14219708	14220292
chr16	14215284	14216434
chr16	9305493	9306915
chr16	9302567	9304517
chr16	9296286	9296649
chr6	3273010	3273913
chr6	3377762	3378562
chr16	55096627	55097219
Zv9_scaffold3544	8746	9217
chr15	6468654	6469378
chr1	30759301	30761779
chr1	30755039	30755577
chr1	30692276	30692633
chr1	30692837	30694925
chr1	30696334	30697188
chr1	30700470	30701477
chr1	30705395	30707279
chr1	30709831	30710205
Zv9_NA47	24201	24705
chr16	51264641	51265274
chr16	51255335	51257722
chr18	46177432	46177821
chr2	887658	887939
chr2	931886	932278
chr13	1974534	1975005
chr13	49048418	49049464
chr13	9479678	9480331
Zv9_scaffold3495	160175	160833
Zv9_scaffold3495	188985	190160
Zv9_scaffold3495	232537	234896
Zv9_scaffold3495	235784	237410
Zv9_scaffold3495	238324	239355
Zv9_scaffold3495	239858	240281
Zv9_scaffold3495	255489	255866
chr14	38352168	38353840
chr14	38345313	38345899
chr14	38342757	38343103
Zv9_scaffold3460	74851	75606
Zv9_scaffold3460	30000	30397
Zv9_scaffold3460	22676	23045
Zv9_scaffold3460	16004	16846
Zv9_scaffold3460	5959	6795
Zv9_scaffold3460	1555	2377
chr16	40109680	40110170
chr16	40107716	40108361
chr16	39999819	40001096
chr17	42207154	42208340
chr17	42205399	42206351
chr17	42195422	42196283
chr17	42191628	42192219
chr17	42113527	42114643
chr17	42072630	42074313
chr17	42070840	42072082
chr17	42066008	42067340
chr17	42056049	42057322
chr17	42045535	42048154
chr17	42027191	42029226
chr17	42022435	42025180
chr17	42020046	42020560
chr17	42014143	42017491
chr17	42008832	42009320
chr17	42005374	42005740
chr17	42002925	42004239
chr17	41999059	42002263
chr17	41993183	41993758
chr17	41987222	41988698
chr17	41961867	41962620
chr17	41931427	41931947
chr17	41917327	41918013
chr17	41791251	41791634
chr17	41700863	41701886
chr17	41698977	41699395
chr17	41680230	41681547
chr17	41676599	41677124
chr17	41672124	41672856
chr17	41670136	41670950
chr17	41667630	41668781
chr17	41664694	41665769
chr17	41663412	41664276
chr17	41657579	41657954
chr17	41654783	41656759
chr17	41650018	41653533
chr17	41645852	41647127
chr17	41644324	41645611
chr17	41638565	41639591
chr17	41631597	41633776
chr17	41629498	41629953
chr17	41625234	41626831
chr17	41622339	41623358
chr17	41613403	41614997
chr17	41603912	41604595
chr17	41597364	41598140
chr17	41564653	41565283
Zv9_scaffold3492	225928	227090
Zv9_scaffold3492	220080	220971
Zv9_scaffold3492	212940	214324
Zv9_scaffold3492	210769	211224
Zv9_scaffold3492	189552	190025
Zv9_scaffold3492	187295	188359
Zv9_scaffold3492	162123	163518
Zv9_scaffold3492	153650	154289
Zv9_scaffold3492	150625	151185
Zv9_scaffold3492	144319	146387
Zv9_scaffold3492	140774	142082
Zv9_scaffold3492	132363	133420
Zv9_scaffold3492	126940	128046
Zv9_scaffold3492	102745	103281
Zv9_scaffold3492	93911	94652
Zv9_scaffold3492	76884	77586
Zv9_scaffold3492	62432	63336
Zv9_scaffold3492	38390	39557
Zv9_scaffold3492	34952	35605
Zv9_scaffold3492	26208	27357
chr20	44611631	44612199
Zv9_scaffold3471	15399	16742
Zv9_scaffold3471	17095	17421
Zv9_scaffold3471	49615	50067
Zv9_scaffold3471	72483	73439
Zv9_scaffold3471	83948	84590
Zv9_scaffold3471	88987	90256
Zv9_scaffold3471	92393	92791
Zv9_scaffold3471	104445	105648
Zv9_scaffold3471	106479	107349
Zv9_scaffold3471	109041	109565
Zv9_scaffold3471	117783	118794
Zv9_scaffold3471	134774	135655
Zv9_scaffold3471	143691	144080
Zv9_scaffold3471	150458	151261
Zv9_scaffold3471	392205	393657
Zv9_scaffold3471	405572	406497
Zv9_scaffold3471	411247	412138
Zv9_scaffold3471	415878	417748
Zv9_scaffold3471	425819	426203
Zv9_scaffold3471	429658	430532
Zv9_scaffold3471	435947	436214
Zv9_scaffold3471	441709	442601
Zv9_scaffold3471	444528	448082
Zv9_scaffold3471	457065	457350
chr6	25321938	25322477
chr11	24872850	24875687
chr11	24880042	24880662
chr11	24754837	24756105
chr11	24743849	24745500
chr11	24702291	24702997
chr11	24699597	24700095
chr11	24680919	24681695
chr11	24674696	24675847
chr11	24671529	24672158
chr11	24670864	24671159
chr11	24667603	24668687
chr11	24653052	24654769
chr11	24650860	24652000
chr11	24643889	24644920
chr11	24640665	24641096
chr11	24627052	24627900
Zv9_scaffold3551	48123	49318
Zv9_scaffold3551	209510	209923
Zv9_scaffold3551	167568	167821
Zv9_scaffold3551	154048	154702
Zv9_scaffold3551	147804	149464
Zv9_scaffold3551	145205	146331
Zv9_scaffold3486	35409	35804
Zv9_scaffold3486	30103	30997
chr9	52541038	52541472
chr3	436436	436789
chr2	20486359	20486758
chr2	20359150	20360481
chr2	20376994	20378388
chr7	6162831	6163815
chr2	25002468	25003435
chr2	25039095	25040372
chr2	25047554	25048216
chr2	25063487	25064545
chr2	25078311	25078542
chr2	25079862	25081560
chr2	25125247	25125600
chr2	25140320	25140955
chr2	25204164	25204639
chr2	25208639	25209884
chr2	25221318	25221857
chr2	25224095	25224538
chr2	25234271	25235159
chr2	25243693	25244717
chr2	25262619	25263817
chr2	25306322	25306783
chr2	25311468	25313236
chr2	25317790	25319096
chr2	25335723	25336120
chr9	28029669	28030032
chr9	27987731	27988578
chr9	27967462	27967828
chr9	27932002	27933182
chr5	10363833	10364325
chr3	33018565	33018925
Zv9_scaffold3564	70489	70836
chr19	13935961	13936853
chr19	13941705	13942250
Zv9_scaffold3548	195663	196114
chr14	46263444	46263943
chr11	2006573	2006925
chr11	2001302	2002844
chr11	1914332	1915104
Zv9_scaffold3520	168097	168355
Zv9_scaffold3529	83185	83580
Zv9_scaffold3529	80046	80271
Zv9_scaffold3529	16352	16866
chr13	53406940	53407986
chr22	36388322	36388692
chr22	36369996	36370533
chr22	36368888	36369712
Zv9_scaffold3563	53967	54341
Zv9_scaffold3563	243187	245023
chr7	13479351	13479780
chr7	13497172	13498298
chr18	3628883	3630084
Zv9_scaffold3540	259935	261079
Zv9_scaffold3540	218827	219742
Zv9_scaffold3540	214381	214970
Zv9_scaffold3540	201362	202273
Zv9_scaffold3540	195963	197165
Zv9_scaffold3540	188127	188664
Zv9_scaffold3540	179825	180089
Zv9_scaffold3540	142549	142992
Zv9_scaffold3540	92964	93988
Zv9_scaffold3540	10064	10278
chr6	44846043	44847136
chr6	44778421	44779155
chr6	44760156	44760876
chr6	44729572	44729962
chr6	44717627	44718284
chr16	32655316	32656362
chr16	32642467	32642971
chr16	32595279	32596383
chr16	32542228	32542954
chr16	32510097	32510430
chr16	32486164	32486617
chr16	32425982	32426397
chr16	32421121	32421558
chr11	8479705	8480541
chr16	10306735	10307114
chr16	10304310	10305291
chr16	10295195	10296096
Zv9_scaffold3500	238385	239404
chr5	66787246	66787602
Zv9_scaffold3534	106055	107509
Zv9_scaffold3534	102714	104577
Zv9_scaffold3534	88100	88766
Zv9_scaffold3534	71679	72438
chr9	52937906	52938639
chr9	53172206	53172833
chr9	5251140	5252865
Zv9_scaffold3477	38315	39334
Zv9_NA95	33515	33913
chr16	46556104	46556475
chr16	46605914	46606346
chr16	46646066	46647301
chr16	46679084	46680625
chr16	46682889	46683298
chr5	10124770	10125369
chr5	20941112	20942809
chr5	20948629	20949055
chr5	20974172	20974760
chr5	20985156	20986331
chr12	22670473	22671229
chr12	22579640	22580632
chr12	22554064	22554432
chr12	22505975	22506317
chr12	22237828	22238269
chr21	30722873	30724339
chr21	30720758	30721936
chr17	36485704	36486207
chr17	36311937	36312915
chr23	5403475	5404149
chr23	5529305	5530250
chr23	5561501	5562439
chr23	5663410	5663796
chr8	29435274	29436984
chr9	4830571	4830977
chr9	4910405	4911121
chr9	4912854	4914494
chr9	4920093	4920864
chr9	4921654	4922082
chr9	4925224	4925843
chr14	29207338	29207987
chr14	29204329	29204849
chr9	4934624	4935866
chr9	4937224	4938051
chr9	4938348	4940446
chr1	513895	514632
chr1	95321	96120
chr1	268542	269097
chr1	479567	480335
chr1	480732	481157
Zv9_NA144	17453	18205
Zv9_NA394	5201	5932
Zv9_NA394	24019	24804
chr12	2452241	2453496
chr12	2443234	2444077
chr12	2442077	2442841
chr1	1465621	1466422
chr1	1775706	1776598
chr1	1992079	1992699
chr1	2052297	2054496
chr1	2062050	2063268
chr1	2064616	2065127
chr1	2069197	2070055
chr1	2080016	2081431
chr1	2113280	2114741
chr1	2125349	2126544
Zv9_NA636	15408	16196
chr1	4127485	4128240
chr1	4115433	4116912
chr1	4111296	4111829
chr1	4097870	4098512
chr1	4220338	4221923
chr1	4217974	4219820
chr1	4214428	4215108
chr1	4212168	4213652
chr1	4208407	4211201
chr1	4201267	4202744
chr1	4179341	4180148
chr1	4177068	4177762
chr1	4165156	4167281
chr1	4354594	4355542
chr1	4357104	4357836
chr1	4367096	4367847
chr1	4370292	4371676
chr1	4494463	4496070
chr1	4499245	4500316
chr1	4641956	4643287
chr1	4690649	4691199
chr1	5234338	5235097
chr1	5270858	5272973
chr1	5328806	5329970
chr1	5369152	5370611
chr1	5452894	5453383
chr1	5488048	5488713
chr1	5530075	5531388
chr1	5621471	5622512
chr1	6481811	6482863
chr1	6452419	6452930
chr1	6434353	6434956
chr1	6428700	6429520
chr1	6413148	6414202
chr1	6404654	6405263
chr1	6628266	6628994
chr1	6669135	6670517
chr1	6677987	6678766
chr1	6830285	6830761
chr1	6803768	6804383
chr1	6802743	6803647
chr1	6788608	6789238
chr1	6784870	6785515
chr1	6589891	6591593
chr3	12848259	12849151
chr1	7930679	7931182
chr1	8096741	8097999
chr1	8267743	8268321
chr1	8309248	8310597
chr1	8357690	8358825
chr1	8368707	8369468
chr1	8389863	8390465
chr1	8444808	8445843
chr1	8450659	8451735
chr1	8454383	8456148
chr1	8457191	8458217
chr1	8460989	8462079
chr1	8470482	8472095
chr1	8499201	8500869
chr1	8508480	8509814
chr1	4962747	4963549
chr1	5003037	5004088
chr1	5006142	5009584
chr1	5011653	5012983
chr1	9867650	9868552
chr1	10053886	10054883
chr1	10217862	10218955
chr1	10283137	10284155
chr1	10303422	10305626
chr1	10891832	10893055
chr1	11008840	11009862
chr1	11017304	11018147
chr1	11185967	11186961
chr1	11243471	11244271
chr24	37103399	37104920
chr1	12119736	12120713
chr1	12180079	12182283
chr1	12184337	12185612
chr1	12187256	12189331
chr1	12189415	12192224
chr1	12192883	12193806
chr1	12195132	12196129
chr1	12203603	12204220
chr1	12241339	12243101
chr1	12245166	12246063
chr1	12292613	12293708
chr1	12605687	12606262
chr1	12890042	12890673
chr1	12980576	12982007
chr1	13068136	13068810
chr1	13088542	13090340
chr1	13714802	13715480
chr1	13784141	13784686
chr1	13938426	13939266
chr1	13940243	13941612
chr1	13956585	13957792
chr1	14039681	14041203
chr1	14041843	14042787
chr1	14043612	14044482
chr1	14046283	14048303
chr1	14105380	14106201
chr1	14516112	14517039
chr1	14537761	14538257
chr1	14539586	14540104
chr1	14582229	14582754
chr1	14599270	14600245
chr1	14643324	14644279
chr1	14647824	14648841
chr1	14657053	14657727
chr1	14767199	14768209
chr1	14682426	14683191
chr1	15034652	15035197
chr1	15161388	15161982
chr1	15175921	15176762
chr1	15179994	15180741
chr1	15180767	15181841
chr1	15186690	15188245
chr1	15221612	15222791
chr1	15335549	15337086
chr1	15312780	15314357
chr1	15308393	15308953
chr1	15306566	15307368
chr1	15304707	15306388
chr1	15301338	15302021
chr1	15500705	15501601
chr1	15502405	15503878
chr1	15519389	15521062
chr1	15586873	15587931
chr1	15603288	15604564
chr1	15924564	15925669
chr1	15997897	15998827
chr1	16007288	16007806
chr1	16040950	16042563
chr1	16043332	16043859
chr1	16044445	16045016
chr1	16051155	16051645
chr1	16053254	16054096
chr1	16058316	16060341
chr1	16064377	16066172
chr1	16097198	16098092
chr1	16142581	16144304
chr1	16152002	16153575
chr1	16171644	16172523
chr1	16181343	16183868
chr1	16200439	16201542
chr1	16205860	16206770
chr1	16226154	16226928
chr1	16227599	16229337
chr1	16231684	16232241
chr1	16288321	16288876
chr1	16300029	16301111
chr1	16307162	16307771
chr1	16416110	16417250
chr1	16494190	16495424
chr1	16497093	16498067
chr1	16690045	16691215
chr1	17125144	17125780
chr1	17182129	17182868
chr1	17348114	17348837
chr1	17349769	17351070
chr1	17358973	17359668
chr1	17376994	17378213
chr1	17379792	17380640
chr1	17394126	17394989
chr1	17569794	17570267
chr1	17576989	17578320
chr1	17585765	17586465
chr1	17611203	17611735
chr1	17626577	17627894
chr1	17640638	17643045
chr1	17653104	17654310
chr1	17657219	17657988
chr1	17663077	17664018
chr1	17816255	17816832
chr1	17910684	17912186
chr1	18007630	18008385
chr1	18112905	18113867
chr1	18121882	18122423
chr1	18131748	18133647
chr1	18139312	18140630
chr1	18146272	18146921
chr1	18148902	18150464
chr1	18151204	18152639
chr1	18156695	18158463
chr1	18184236	18184858
chr1	18258378	18259303
chr1	18360503	18361565
chr1	18379211	18380000
chr1	18400363	18402680
chr1	18404192	18406588
chr1	18420468	18421012
chr1	18422186	18424353
chr1	18427392	18429196
chr1	18429543	18431002
chr1	18431600	18433616
chr1	18449504	18451252
chr1	18460442	18461007
chr1	18525804	18527394
chr1	18629914	18630775
chr1	18631190	18633279
chr1	18668639	18669686
chr1	18882464	18883310
chr1	19059359	19061541
chr1	19089087	19089883
chr1	19324529	19325363
chr1	19395107	19395681
chr1	19598737	19600649
chr1	19609492	19610039
chr1	19613336	19614366
chr1	19615318	19616492
chr1	19617899	19620097
chr1	19647690	19648923
chr1	19652179	19652646
chr1	19991612	19992785
chr1	20002856	20003749
chr1	20004159	20005084
chr1	20073950	20075662
chr1	20358721	20359872
chr1	20407158	20407994
chr1	20428355	20429641
chr1	20532365	20533895
chr1	20553361	20554182
chr1	20568323	20569240
chr1	20569375	20569986
chr1	20570011	20571611
chr1	20575873	20577810
chr1	20616854	20617628
chr1	20656518	20657535
chr1	20840514	20841301
chr1	21143796	21144572
chr1	21441094	21443385
chr1	21444940	21445671
chr1	28002753	28004602
chr1	27895808	27896888
chr1	27889970	27891014
chr1	29753729	29754941
chr1	29826993	29827507
chr1	29741879	29742478
chr1	29718879	29720457
chr1	29713703	29715299
chr1	29672970	29674070
chr1	29630912	29631455
chr1	29479997	29481478
chr1	29461093	29461786
chr1	29400228	29400972
chr1	29167992	29169546
chr1	28880618	28881083
chr1	28871874	28872913
chr1	28860372	28862376
chr1	28857456	28859561
chr1	28854870	28855446
chr1	28843861	28845209
chr1	28836280	28841351
chr1	28830669	28832206
chr1	28824685	28827736
chr1	28821046	28824133
chr1	28815051	28820267
chr1	28813143	28814765
chr1	28810907	28812830
chr1	28794673	28795916
chr1	28792372	28793842
chr1	28784010	28785181
chr1	28782934	28783547
chr1	28779744	28781139
chr1	28776547	28777374
chr1	28686020	28687834
chr1	28640196	28640711
chr1	28627198	28628322
chr1	28618512	28619752
chr1	28616590	28617638
chr1	28603711	28604546
chr1	28585180	28586167
chr1	28559432	28560708
chr1	28531069	28531874
chr1	28517684	28518389
chr1	28273418	28274286
chr1	28149564	28151988
chr1	28131426	28132473
chr1	28122041	28123238
chr1	22817760	22818648
chr1	22836088	22838590
chr1	22843353	22844416
chr1	22869605	22870100
chr1	22917574	22918283
chr1	22934072	22935481
chr1	22936415	22938026
chr1	23007047	23010077
chr1	23013082	23014011
chr1	23179521	23180075
chr1	23335953	23336463
chr1	23417649	23418652
chr1	23522221	23523401
chr1	23621048	23621678
chr1	23674983	23676661
chr1	23704058	23705075
chr1	23709278	23710665
chr1	23713950	23714648
chr1	23716188	23717388
chr1	23728841	23731676
chr1	23739834	23741492
chr1	23742588	23743992
chr1	23745499	23746435
chr1	23748161	23749135
chr1	23755833	23758279
chr1	23764291	23765284
chr1	23778284	23780262
chr1	23784763	23786452
chr1	23787613	23789034
chr1	23790359	23791493
chr1	23791854	23793595
chr1	23794827	23796758
chr1	23802821	23804293
chr1	23938222	23940319
chr1	23952117	23953854
chr1	24014705	24015818
chr1	24083592	24084888
chr1	24102269	24103396
chr1	24193249	24193824
chr1	24253969	24254616
chr1	24291206	24292322
chr1	24586336	24586943
chr1	24702983	24703892
chr1	21512771	21513537
chr1	21604481	21605408
chr1	21779611	21780754
chr1	21904459	21906143
chr1	21955685	21956669
chr1	22053581	22054139
chr1	22151641	22152201
chr1	22226380	22227591
chr1	22389539	22390069
chr1	22435129	22435930
chr1	22563844	22565623
chr1	22570433	22571669
chr1	22583880	22584794
chr1	22593781	22595368
chr1	22596191	22597850
chr1	22617617	22618647
chr1	27469253	27471499
chr1	27472161	27472999
chr1	27453469	27454288
chr1	27426047	27426572
chr1	24844704	24846304
chr1	24949971	24951120
chr1	25083636	25085155
chr1	25086743	25087822
chr1	25115074	25118313
chr1	25130099	25130818
chr1	25174804	25175586
chr1	25220268	25222970
chr1	25230334	25232014
chr1	25237349	25241072
chr1	25249658	25250523
chr1	25251056	25253866
chr1	25317015	25317732
chr1	25684546	25686057
chr1	25792943	25796100
chr1	25806322	25807838
chr1	25809668	25811513
chr1	25816911	25817895
chr1	25819529	25821251
chr1	25836676	25837538
chr1	25841651	25844713
chr1	25846041	25851754
chr1	25860022	25860907
chr1	25874854	25875537
chr1	25877524	25883009
chr1	25887704	25889882
chr1	25965763	25967288
chr1	26004473	26007991
chr1	26008530	26009275
chr1	26015478	26016810
chr1	26018658	26019905
chr1	26059924	26060799
chr1	26094823	26095393
chr1	26096182	26097658
chr1	26140025	26142207
chr1	26145652	26146353
chr1	26450114	26450676
chr1	26840977	26842192
chr1	30132604	30134172
chr1	30131341	30132478
chr1	30080178	30080777
chr1	30078194	30078895
chr1	30072095	30073674
chr1	30063364	30065009
chr1	30018855	30020383
chr1	30006917	30008245
chr1	30913450	30914550
chr1	31002172	31003004
chr1	31005813	31006665
chr1	31010873	31011736
chr1	31188377	31188950
chr1	31194945	31195828
chr1	31368173	31368934
chr1	32082774	32084653
chr1	32486802	32487554
chr1	32485398	32485953
chr1	32480348	32481224
chr1	32478879	32479736
chr1	33074652	33075128
chr1	33231591	33232395
chr1	33262193	33263105
chr1	33326094	33326671
chr1	33433156	33433656
chr1	33762291	33763487
chr1	33923649	33924106
chr1	33950591	33951946
chr1	34208110	34209013
chr1	34216254	34217887
chr1	34248093	34248687
chr1	34259057	34259808
chr1	34269060	34269410
chr1	34271696	34272355
chr1	34301341	34302282
chr22	15238336	15239803
chr22	15232381	15233383
chr22	15231167	15232279
chr22	15229894	15230867
chr1	37114873	37116069
chr1	37111978	37112876
chr1	37088425	37088991
chr1	37081847	37083102
chr1	37076218	37077516
chr1	36731272	36732339
chr1	36722333	36723923
chr1	36707298	36708116
chr1	36639193	36640665
chr1	36578340	36579010
chr1	36489771	36491076
chr1	36241524	36242646
chr1	36231776	36232674
chr1	36214907	36216266
chr1	36212342	36214124
chr1	36208937	36210206
chr1	36152951	36153735
chr1	36141666	36142492
chr1	36116060	36117218
chr1	36083118	36083460
chr1	36072605	36073293
chr1	36066304	36067197
chr1	36064188	36065745
chr1	36054966	36055805
chr1	35915015	35916473
chr1	35881025	35882228
chr1	35852761	35853549
chr1	35842076	35844302
chr1	35800724	35801798
chr1	35794456	35795044
chr1	35783981	35784739
chr1	35777736	35779795
chr1	35767249	35768880
chr1	35764272	35765581
chr1	35726735	35727535
chr1	35720315	35722128
chr1	35715956	35716598
chr1	35683930	35684685
chr1	35647785	35648783
chr1	35641662	35642461
chr1	35626427	35627371
chr1	35549018	35550108
chr1	35515243	35516735
chr1	35508808	35511295
chr1	35506750	35508532
chr1	35405517	35407439
chr1	35269081	35269651
chr1	35265958	35267235
chr1	35239836	35240545
chr1	35237175	35238496
chr1	35228923	35229881
chr1	35225783	35227314
chr1	35222431	35224130
chr1	35210495	35212523
chr1	35207033	35208757
chr1	35195721	35196879
chr1	34643506	34644236
chr1	39046657	39048003
chr1	39052950	39054435
chr1	39055247	39056372
chr1	39060467	39060962
chr1	39086730	39087573
chr1	39153679	39154779
chr1	528929	530202
chr1	38843570	38844185
chr1	38840439	38841015
chr1	38787906	38789198
chr1	38766433	38767221
chr1	38749171	38750310
chr1	38747727	38749010
chr1	38740373	38742655
chr1	38689330	38690334
chr1	38606756	38607579
chr1	38598689	38599454
chr1	38592561	38593255
chr1	38589915	38591183
chr1	38585118	38585919
chr1	38565091	38565657
chr1	38561782	38562983
chr1	38558404	38559801
chr1	38502265	38504069
chr1	38495362	38496147
chr1	38302126	38302686
chr1	40875436	40876238
chr1	40854773	40855913
chr1	40842372	40843894
chr1	40839073	40840047
chr1	40834808	40837085
chr1	40822973	40825112
chr1	40819698	40820920
chr1	40815793	40817110
chr1	40812625	40813223
chr1	40808158	40809666
chr1	40803953	40804569
chr1	40802939	40803892
chr1	40800975	40801594
chr1	40797132	40798406
chr1	40790734	40792422
chr1	40787718	40788346
chr1	40752973	40753662
chr1	40746962	40747628
chr1	40745751	40746608
chr1	40736237	40738548
chr1	40734743	40736162
chr1	40710287	40711179
chr1	40706314	40706914
chr1	40692493	40693277
chr1	40621625	40622521
chr1	40503957	40504803
chr1	40474037	40475482
chr1	40466525	40469438
chr1	40463741	40464919
chr1	40462558	40463340
chr1	40383430	40384240
chr1	40318170	40318656
chr1	40310468	40311386
chr1	40305553	40307680
chr1	40249960	40253408
chr1	40241659	40243077
chr1	40238449	40239243
chr1	40234023	40236153
chr1	40161834	40162521
chr1	40100258	40101533
chr1	40081739	40082395
chr1	39845205	39847068
chr1	39842272	39843048
chr1	39832385	39833180
chr1	39828437	39829111
chr1	39795385	39797199
chr1	39793496	39794167
chr1	39708895	39709735
chr1	39594542	39596496
chr1	39592088	39593147
chr1	39581494	39582895
chr1	39579186	39580184
chr1	39573717	39574337
chr1	39553627	39554206
chr1	39546494	39548475
chr1	39512689	39514847
chr1	39480743	39482064
chr1	39466443	39467541
Zv9_NA965	9947	10498
chr1	41141950	41142725
chr1	41165851	41166728
chr1	41202266	41202989
chr1	41222083	41222655
chr1	41278099	41278792
chr1	41279030	41279984
chr1	41287849	41288558
chr1	41298966	41299943
chr1	41335243	41335679
chr1	41492726	41494036
chr1	41560028	41560935
chr1	41641429	41642053
chr1	41896908	41897381
chr1	41897473	41899145
chr1	44651994	44652631
chr1	44683164	44683967
chr1	44685307	44686515
chr1	44935299	44936069
chr1	44949082	44949926
chr1	45001604	45002757
chr1	45178970	45180372
chr1	45233764	45234823
chr1	45241561	45242433
chr1	45379668	45380760
chr1	45639546	45640013
chr1	45757599	45758306
chr1	45818781	45819734
chr1	46011367	46011951
chr1	46057909	46061041
chr1	46061382	46063614
chr1	46064392	46071399
chr1	46073168	46078653
chr1	46185344	46187990
chr1	46189021	46189651
chr1	46189885	46192031
chr1	46195602	46199448
chr1	46200600	46202452
chr1	46202844	46206383
chr1	46230354	46233517
chr1	46249709	46251060
chr1	46257674	46258453
chr1	46304747	46305743
chr1	45478813	45479646
chr1	45469355	45471126
chr1	42031685	42033323
chr1	42034608	42038421
chr1	42038422	42039241
chr1	42040961	42041940
chr1	42080297	42081963
chr1	42102938	42103498
chr1	42146846	42147897
chr1	42158117	42158949
chr1	42160345	42161507
chr1	42161863	42162505
chr1	42177047	42181645
chr1	42189365	42191800
chr1	42227024	42227604
chr1	42234731	42235282
chr1	42247108	42247715
chr1	42252090	42253149
chr1	42264578	42265201
chr1	42322958	42323761
chr1	42393995	42394599
chr1	42614420	42615775
chr1	42685050	42685690
chr1	42776490	42777806
chr1	42802061	42802578
chr1	42805820	42806752
chr1	42812459	42813849
chr1	42835538	42836303
chr1	42836964	42838413
chr1	42840189	42841592
chr1	42842699	42843500
chr1	42897221	42897896
chr1	42908760	42910293
chr1	42913194	42914851
chr1	42934972	42935658
chr1	42951089	42952321
chr1	43008001	43008784
chr1	43094366	43094935
chr1	43097574	43099044
chr1	43101600	43102607
chr1	43159881	43162019
chr1	43208828	43209840
chr1	43330950	43331540
chr1	43476635	43478261
chr1	44049832	44051036
chr1	44133276	44134093
chr1	44172630	44173393
chr1	44183749	44186522
chr1	44394598	44396784
chr1	46546932	46547746
chr1	46609363	46610099
chr1	46612038	46612937
chr1	46613630	46615254
chr1	46617096	46617592
chr1	46639355	46640106
chr1	46641197	46642945
chr1	46665907	46668119
chr1	46668990	46670339
chr1	46696474	46699145
chr1	46731277	46732263
chr1	46744623	46745759
chr1	46746857	46748920
chr1	46961619	46962435
chr1	47031145	47032201
chr1	47047366	47048807
chr1	47139085	47140209
chr1	47256717	47257861
chr1	47261073	47261837
chr1	47571865	47573548
chr1	47573981	47576226
chr1	47581886	47583093
chr1	47634600	47635922
chr1	47687922	47689451
chr1	47692484	47693461
chr1	47718220	47719842
chr1	47743345	47745005
chr1	47781397	47782377
chr1	47797014	47798393
chr1	47847328	47848555
chr1	47850525	47851428
chr1	47870357	47871943
chr1	47974711	47975595
chr1	48018790	48019761
chr1	48093273	48093914
chr1	48198427	48199067
chr1	48210501	48211372
chr1	48218456	48219529
chr1	48243144	48244090
chr1	50059379	50059982
chr1	49902155	49902749
chr1	49855302	49856481
chr1	49851062	49852030
chr1	49848890	49850527
chr1	49842902	49848116
chr1	49840233	49842654
chr1	49837346	49839910
chr1	49833790	49835817
chr1	49824491	49825976
chr1	49820757	49821957
chr1	49812245	49813260
chr1	49797597	49798755
chr1	49753495	49754333
chr1	49749604	49750808
chr17	10730183	10731257
chr17	10734342	10734892
chr17	10736171	10737810
chr17	10739314	10739965
chr17	10765041	10766456
chr17	10781605	10782146
chr17	10768266	10768902
chr17	10769404	10772080
chr17	10775568	10777432
chr17	10782763	10784876
chr17	10788338	10789104
chr17	10792411	10793454
chr17	10796713	10799130
chr17	10799615	10801922
chr1	49102321	49103591
chr1	50279152	50281825
chr1	50282843	50283902
chr1	50285583	50286729
chr1	50296242	50298439
chr1	50299831	50300885
chr1	50310658	50311198
chr1	50331472	50333274
chr1	50339623	50341401
chr1	50342381	50344197
chr1	50351248	50353973
chr1	50354974	50356449
chr1	50360435	50361048
chr1	50362361	50363348
chr1	50367558	50368378
chr1	50375174	50377503
chr1	50402356	50404433
chr1	51012524	51013156
chr1	51150638	51151459
chr1	51155958	51157266
chr1	51204178	51209118
chr1	51239978	51240988
chr1	51302898	51303908
chr1	51305312	51306497
chr1	51353475	51354204
chr1	51372643	51373606
chr1	51377505	51378730
chr1	51388305	51389582
chr1	51391469	51392524
chr1	51393201	51394293
chr1	51394419	51395400
chr1	51397617	51399389
chr1	51401176	51402670
chr1	51403058	51405110
chr1	51406794	51408746
chr1	51412020	51412840
chr1	51423629	51424863
chr1	51454512	51455257
chr1	51597095	51597706
chr1	51603343	51604134
chr1	51692167	51694146
chr1	51689054	51690344
chr1	52014998	52016825
chr1	52012763	52013893
chr1	52008304	52008973
chr1	51975760	51978400
chr1	51972062	51973311
chr1	52191258	52192385
chr1	52231290	52231915
chr1	52234753	52235302
chr1	52243136	52244019
chr1	52247920	52251008
chr1	52264651	52265533
chr1	52286064	52286547
chr1	52295751	52296323
chr1	52323223	52323807
chr1	52323901	52325384
chr1	52366575	52367346
chr1	52393815	52394781
chr1	52401090	52402113
chr1	52446178	52448096
chr1	52472050	52472932
chr1	52713414	52713899
chr1	52732351	52733512
chr1	52768971	52770122
chr1	53239619	53240686
chr1	53312689	53313390
chr1	53414373	53415172
chr1	53427735	53428222
chr1	53465213	53465959
chr1	53590583	53591168
chr1	53608077	53609015
chr1	53805642	53806396
chr1	53823481	53824331
chr1	53825851	53826583
chr1	54061888	54063090
chr1	54075171	54075806
chr1	54467844	54468822
chr1	54558315	54559184
chr1	54565736	54567679
chr1	54593241	54595400
chr1	54899059	54900377
chr1	55687237	55688355
chr1	55526169	55531017
chr1	55390372	55391128
chr1	55388806	55389952
chr1	55280580	55283441
chr1	55261812	55262904
chr1	55203405	55204535
chr1	55794191	55794614
chr1	56185751	56186529
chr1	56754324	56754840
chr1	56881237	56882299
chr1	56969055	56969639
chr1	54720741	54721735
chr1	56441311	56442182
chr1	53136551	53137246
chr1	53091219	53091849
chr1	53061327	53062444
chr1	53017949	53018559
chr1	52912370	52913654
chr1	52900790	52901625
chr1	52883564	52884127
chr1	57297961	57298545
chr1	57273909	57275353
chr1	57265558	57266655
chr1	57263384	57263982
chr1	57737517	57738520
chr1	57638710	57639813
chr1	57630610	57631456
chr1	57942518	57943779
chr1	59463678	59464560
chr1	59571880	59572862
chr1	58713664	58714386
chr1	58765864	58766170
[truncated: 21,749 more rows]

## Sheet: Table_S21
PDREs_Zv9_24hpf
Zv9_NA692	26307	26822
chr15	159115	159462
chr2	39824460	39825942
chr2	39820808	39823654
chr2	39819196	39819787
chr2	39815431	39816695
chr2	39811313	39813328
chr2	39806173	39807212
chr2	39793977	39795812
chr12	44752826	44753386
chr5	66094578	66095475
chr3	21222083	21222379
Zv9_NA102	6015	6403
chr23	1187272	1187806
chr23	1182544	1183221
chr25	33978583	33979001
chr13	5826907	5827734
chr13	5822593	5823787
chr13	5814078	5815278
chr2	20252030	20252726
Zv9_NA494	8999	9790
Zv9_NA494	13347	14395
chr21	689545	690478
chr21	705588	706066
chr21	706282	706804
chr21	715185	715907
chr21	725394	726554
chr21	727077	727492
chr21	730457	731594
chr6	25952725	25953172
chr14	7199270	7199974
chr15	40712647	40713341
chr23	37043713	37044399
chr23	37061734	37062141
chr23	37065613	37066821
chr23	37068294	37069317
chr23	37074195	37075957
chr23	37079099	37079862
chr23	37095689	37096599
chr20	50072313	50073146
chr19	2246044	2247369
chr7	72386473	72386996
chr22	38683046	38683946
chr22	38724771	38725093
chr22	38746853	38747432
chr22	38750462	38750832
chr22	38759816	38760372
chr22	38769327	38769811
chr22	38771698	38772152
chr19	42532470	42533114
chr22	26581103	26581683
chr16	14201574	14202147
chr13	46896974	46897554
chr13	46887899	46888764
chr13	42797140	42799049
chr13	42791878	42792524
chr13	42786689	42787384
chr13	42770737	42771188
chr13	42756134	42756483
chr7	52180422	52181567
chr18	11059493	11059805
Zv9_scaffold3563	285108	286338
chr16	40224791	40225412
chr16	40196386	40197807
chr14	40989301	40990073
chr5	11987921	11988211
chr20	45417709	45418010
chr12	3789171	3790118
chr21	3504093	3504822
chr5	34127931	34129160
chr5	34130456	34131441
chr5	34133430	34133751
chr5	34134322	34135230
chr5	34136473	34137001
chr12	6431186	6431491
chr19	11881877	11882376
chr19	2949842	2950316
chr16	46388166	46388555
chr5	5551343	5551567
chr19	1041401	1041853
chr10	17305452	17306706
chr11	44305438	44306088
chr14	37714533	37714906
chr14	37728286	37728685
chr1	52056953	52057373
chr1	52042221	52042512
chr1	52071635	52071990
chr1	52084571	52085195
chr21	7446375	7446884
chr7	75876375	75876680
chr7	76394479	76394867
chr7	76393582	76394272
chr24	35555063	35555740
chr24	35610273	35610976
chr24	35614736	35615631
chr6	20802278	20802687
chr23	41726312	41726688
chr5	50682636	50684301
chr17	9511319	9511736
chr18	49514366	49514779
chr18	49461489	49462014
chr18	49477933	49478396
chr11	2085394	2085955
chr2	19698189	19698647
Zv9_NA533	20056	21355
chr11	44910687	44912112
chr6	2047568	2048023
chr1	2520638	2521104
chr1	2530585	2531288
chr1	2676597	2677264
chr9	41024189	41025202
chr18	25852705	25853410
chr18	25865767	25866178
chr12	1798369	1799402
chr12	1800152	1800835
chr2	55906081	55906522
chr14	46646332	46646657
chr14	46651118	46651580
chr18	1713297	1713915
chr18	1736909	1738115
chr4	6518421	6519954
chr22	38658348	38658687
chr22	38602322	38602867
chr11	10350736	10351104
chr13	53836974	53837365
chr8	1412709	1413150
chr4	6509774	6510297
chr4	6463425	6463958
Zv9_NA921	80183	80959
Zv9_NA921	77548	78299
Zv9_NA921	74150	75191
Zv9_NA46	3351	3814
chr25	4523463	4524073
chr25	1883077	1883493
chr3	48757481	48757914
chr4	856736	857128
chr16	47267877	47268384
chr21	43229685	43230093
Zv9_scaffold3548	90706	91562
Zv9_NA760	790	1151
chr17	43880755	43881911
chr2	4248416	4248795
chr23	39011884	39012511
chr23	39008045	39008811
Zv9_NA254	876	1296
chr14	5177643	5178626
chr11	34989200	34989703
chr2	600476	600855
chr2	627461	628084
chr2	640207	641417
chr2	663921	664652
chr25	34304290	34304662
chr13	50533377	50533717
chr7	72723093	72723594
chr14	29236644	29237644
chr14	29286860	29287267
chr8	50581665	50582718
chr8	50573133	50573999
Zv9_scaffold3500	34762	35411
chr20	45688454	45688826
chr7	72862207	72862732
chr17	50165471	50166180
chr12	3184435	3185036
chr12	3181560	3182111
chr17	48502110	48502549
chr17	48480008	48480781
chr8	8482986	8483374
chr8	8479743	8479927
chr1	29737689	29738312
chr3	61123751	61124298
chr1	4807187	4808084
chr1	4811875	4812579
chr1	4838589	4839918
chr1	4855036	4856081
chr1	4879146	4879703
chr1	4872743	4873424
chr7	72286721	72287088
chr1	4773967	4774842
chr1	4778140	4778715
chr16	55389757	55390142
chr16	55422680	55424044
chr15	6207496	6208323
chr15	6275211	6275878
chr21	3672326	3672868
chr21	3676080	3676590
chr21	3678358	3679783
chr21	3696602	3697252
chr12	8022824	8023172
chr12	8022203	8022614
chr23	38967690	38968405
chr23	38962611	38963533
chr23	38977091	38977518
chr23	38978189	38978800
chr23	38979869	38980716
chr23	38982300	38983199
chr23	38984255	38984876
chr23	38986452	38987128
chr23	38989013	38989601
chr7	74998394	74998637
chr14	1076453	1077297
chr14	1090510	1091113
chr11	941733	942636
chr11	938575	938955
chr8	50140934	50141443
chr5	7473033	7473387
chr18	3419086	3419807
chr15	44098680	44099146
chr15	44123527	44123883
chr21	41245234	41245971
chr21	41252689	41253032
chr21	41268799	41269141
chr4	4552725	4553222
chr12	2052325	2052939
chr11	24609976	24611070
chr11	24614678	24615125
chr12	45464968	45465865
chr12	45431127	45431931
chr12	45427888	45428703
chr12	45426267	45427431
chr12	45418140	45418697
Zv9_NA48	143122	143553
Zv9_NA48	145638	146407
chr2	41416734	41417323
Zv9_NA677	13426	13949
chr6	1199587	1200192
chr6	1193722	1194048
chr19	30144086	30145023
chr9	6866800	6867749
chr21	13186808	13187796
chr21	13182722	13183258
chr10	12599576	12599822
chr12	50526590	50527012
chr2	20297735	20298734
Zv9_NA101	12755	13535
Zv9_NA101	22575	22956
Zv9_scaffold3497	26737	27096
chr11	1846715	1847434
chr15	42209893	42212036
chr16	55209691	55210865
chr23	1140524	1140978
chr13	52214064	52215180
chr13	52241965	52243354
chr13	52228502	52229760
chr9	2444245	2444693
chr18	45367614	45367920
chr13	47145410	47145835
chr13	47147804	47148465
chr13	47134191	47134547
chr13	47135208	47135949
chr11	44229140	44229524
chr6	55696495	55697226
Zv9_NA372	155522	155983
Zv9_NA372	176071	176725
Zv9_NA461	53759	54300
Zv9_NA461	32596	33393
chr6	56295224	56296434
chr8	1403939	1404442
chr7	26648852	26649475
chr5	19004811	19005517
chr5	19002451	19003537
chr5	18995741	18996548
chr5	18984758	18985636
chr5	18979744	18980043
chr5	18975360	18975821
chr15	42656610	42657643
chr9	6421457	6421837
chr17	3820939	3821316
chr23	4492339	4493062
chr23	4679390	4680026
chr5	6359379	6359971
chr20	45127179	45127849
chr20	45138875	45139374
chr20	45168622	45169630
chr20	45184681	45185434
chr23	41314603	41314969
chr23	41268831	41269770
chr23	41265839	41266476
chr23	41239265	41239611
chr23	41222490	41222940
chr23	190027	191061
chr6	30075538	30075783
chr18	9362128	9363060
chr25	7085279	7085627
chr14	47869268	47869605
chr24	30665701	30666159
chr22	12466940	12467265
chr22	12463739	12464448
chr22	12454918	12456420
chr16	670949	671802
chr20	53336769	53337583
chr20	53338933	53339439
chr20	53362250	53363018
chr12	45016910	45017588
chr12	44957748	44958115
chr20	6575146	6575771
chr23	45732653	45733027
chr8	29424370	29424899
Zv9_NA849	53090	53463
chr25	8250654	8251114
chr9	48836108	48836583
chr16	55875703	55876097
chr5	66636439	66636861
Zv9_NA41	44577	45073
chr22	34419923	34420332
chr4	60018056	60018710
chr17	52487391	52488504
chr17	52494027	52494418
chr17	52542099	52542732
chr6	4465984	4466409
chr25	4560478	4561173
chr9	50346366	50347158
chr13	45898992	45899704
chr18	39542183	39542510
chr18	39546349	39546948
chr13	49468651	49469498
chr13	49471909	49472982
chr13	49538014	49538494
chr1	30851274	30851885
chr2	2774949	2775415
chr22	20668281	20668762
chr22	20673150	20673952
chr2	2666887	2667647
Zv9_NA407	35750	36613
chr19	48121161	48121730
chr19	48145578	48146550
chr19	48154269	48155082
chr19	48173563	48173899
chr24	36404031	36405164
chr24	36567871	36568575
chr24	36586097	36586374
chr7	75353781	75354238
chr7	75352265	75352668
chr3	13835728	13836412
chr3	13843162	13844304
chr3	13852903	13853438
chr3	13885378	13885673
Zv9_scaffold3556	57709	58448
Zv9_scaffold3556	31218	31909
chr3	13504685	13505729
chr3	13485394	13486681
chr10	1393946	1394323
chr7	6213984	6214453
chr18	12530605	12530998
chr21	428772	429201
chr18	41414744	41415640
chr18	41451463	41452909
chr18	41454644	41455894
chr18	41462843	41464610
chr18	41465936	41468206
chr18	41472063	41472841
chr18	41476784	41478454
chr18	41484376	41485302
chr18	41511805	41513000
chr18	41525464	41526055
chr18	41535238	41535586
chr18	41547557	41548236
chr18	41548462	41548829
chr18	41551487	41555295
chr18	41701929	41702405
chr18	41695444	41695911
chr22	40307490	40307832
chr25	847584	848027
chr17	3962123	3963015
chr5	73492831	73493575
Zv9_scaffold3535	46720	47255
chr19	7365696	7367042
chr19	7363611	7364532
chr19	7356807	7357632
chr19	7352592	7353232
chr4	60168092	60168937
chr18	1342663	1342990
chr18	1417984	1418505
chr17	4318558	4318990
chr13	49819512	49819871
chr22	40167733	40168075
chr25	34807149	34807867
chr24	8279116	8279915
chr25	1854673	1855248
chr4	7956697	7957850
chr4	7954237	7955059
chr18	11176895	11177588
chr15	3125587	3125981
chr15	3126195	3126613
chr15	3162649	3163477
chr15	3198108	3198755
chr24	35692857	35693158
chr23	21104931	21105439
chr19	4582509	4583353
chr19	4583589	4583838
chr11	46596625	46597284
chr25	1787871	1788478
chr25	1779692	1779940
chr25	1770859	1771135
chr9	943965	944280
chr20	3464919	3465237
chr24	20391200	20392557
chr24	20381114	20382479
chr24	20372823	20373898
chr24	21914904	21916459
Zv9_NA277	11251	11994
chr20	4292012	4292350
chr20	4316901	4318343
chr20	4332396	4334170
chr20	4361300	4362119
chr20	4364934	4365193
chr9	4283588	4283953
chr9	4121059	4121967
chr10	4002044	4002376
chr10	4001532	4001761
chr10	3999771	4000513
chr23	2625733	2626062
Zv9_NA348	1874	2280
Zv9_NA348	12224	12526
chr7	68238893	68240036
chr7	75575444	75575759
chr10	12435537	12436237
chr10	12431367	12431974
chr22	3270247	3271085
chr5	8697154	8697524
chr5	8704692	8705142
chr11	35155442	35155974
Zv9_NA345	22846	23086
Zv9_NA345	63735	64640
chr23	34820828	34821151
chr6	58353965	58354329
chr18	31319894	31320329
chr1	4050495	4051002
chr1	3950833	3951333
chr1	3933418	3933880
chr25	5530287	5530696
chr25	5561140	5562049
chr16	8354992	8356257
chr16	7468813	7469185
chr5	328701	329084
chr11	44882920	44883293
chr11	44853316	44853865
chr11	44840480	44841198
chr11	44831438	44831880
chr13	7366272	7367340
chr13	7337100	7338578
chr13	7319166	7319484
chr13	7314740	7315451
chr13	7308081	7310612
chr13	7304241	7305604
chr13	7297862	7298608
chr13	7293871	7294197
chr13	7291537	7292711
chr13	7286391	7286767
chr13	7282987	7284060
chr13	7265172	7266208
chr19	35420963	35421751
chr16	4693558	4694009
Zv9_scaffold3454	60743	61045
chr3	10945201	10945602
chr3	10933409	10934264
chr3	10917132	10918171
chr18	48215628	48216064
chr18	48219069	48219635
chr18	48223698	48224066
Zv9_NA403	97931	98684
Zv9_NA403	61487	61859
Zv9_NA403	49762	51223
Zv9_NA403	22438	22817
Zv9_NA403	17276	18600
chr23	41455090	41455521
chr23	41457434	41457800
chr15	3615772	3616298
chr15	3609451	3609970
chr15	3714195	3714549
Zv9_NA908	124513	124980
chr13	4428591	4428975
chr2	55294203	55294513
chr14	3868501	3868954
chr14	3950358	3950765
chr14	3903198	3903636
chr12	9099875	9100114
chr12	9056118	9056421
chr1	3409215	3410060
chr1	3406697	3407396
chr5	12439136	12439452
chr5	12440686	12441009
chr5	12441848	12442105
chr5	12532276	12532910
chr14	6737720	6738173
chr8	45612345	45612828
chr8	45609401	45611133
chr13	2789183	2789558
chr13	2780900	2781413
chr25	2864623	2865202
chr25	2836254	2836593
chr1	4228982	4229376
chr9	5673187	5673530
chr5	2726957	2727745
chr12	8945721	8946470
chr16	55989452	55990026
chr16	55984707	55985057
chr23	21158594	21161100
chr23	21163259	21164255
chr23	21168335	21169703
chr23	21186711	21187565
chr23	21190952	21191369
chr18	33263251	33263845
chr18	46870807	46872516
chr18	46868686	46869154
chr21	3065097	3065697
chr4	23557012	23557295
chr4	23581016	23581609
chr13	40035449	40035923
chr13	40036180	40036529
Zv9_NA397	6288	6856
Zv9_scaffold3551	240037	241091
chr15	26882278	26882587
chr13	3423556	3423745
chr17	36260188	36260622
chr16	46401731	46402621
Zv9_scaffold3463	3627	4228
Zv9_scaffold3463	11128	12614
chr7	73206896	73207723
chr7	73209674	73210057
chr7	73266512	73267105
chr7	73267905	73268164
chr9	8756249	8756763
chr3	59132311	59132862
chr18	43570355	43570938
chr8	8219727	8220052
chr19	42233228	42233730
chr10	16858217	16858640
chr10	17272257	17273098
chr10	17259354	17259731
Zv9_NA177	26153	26484
chr21	3510625	3511204
chr10	4115507	4116124
chr5	8776798	8777616
chr5	8771461	8771816
chr5	8768195	8769031
chr7	13580106	13580466
chr14	596477	597015
chr22	40396534	40396819
chr22	34328611	34328975
Zv9_NA173	48361	49309
chr23	38745876	38746502
chr21	3402078	3402509
chr21	3418923	3419320
chr10	43621136	43621782
Zv9_NA227	75705	76111
Zv9_NA545	109476	110019
Zv9_NA650	48778	49471
chr2	58057863	58058584
chr7	73168609	73169458
chr11	44255555	44256341
chr17	42772133	42772499
chr4	60178858	60179561
chr4	60177066	60177565
chr3	61132851	61133311
chr3	61131969	61132365
chr24	1934157	1934687
chr24	1966962	1967591
chr14	27285729	27286650
chr14	27314343	27314726
chr9	43058983	43059417
chr22	40124273	40125051
chr12	2326413	2326899
chr15	37380482	37380834
chr25	2853518	2854287
chr23	2674224	2676655
Zv9_NA503	201291	202293
Zv9_NA503	197359	198364
Zv9_NA503	194865	195574
chr19	4496054	4496668
Zv9_NA122	1028	1664
Zv9_NA974	4674	5261
chr6	57734230	57734957
chr12	44750424	44751121
chr2	2648021	2648665
chr7	75173875	75174460
chr2	59804938	59805279
chr24	37161925	37162363
chr24	37157083	37157911
chr20	51097872	51098192
chr8	636206	637144
chr23	38405361	38405692
chr6	19839397	19840273
chr6	19854223	19854679
chr2	41867261	41868361
chr2	41858713	41859058
chr16	56720178	56720699
chr12	1572731	1573181
Zv9_NA561	8190	8795
chr24	37563255	37564229
chr22	27616664	27617110
chr5	62764203	62764876
chr5	62820542	62823216
chr5	62829140	62829587
chr23	37747894	37749453
chr21	3450651	3451027
chr20	4406113	4406930
chr20	4431299	4431929
chr9	56241873	56242411
chr3	10766652	10767167
chr3	10473963	10474339
chr8	56159878	56160365
chr18	23497160	23498846
chr18	23485380	23485956
chr18	23468626	23469007
chr18	23457239	23458775
chr18	23405447	23406192
chr18	23398359	23398749
chr18	23397593	23397968
chr18	23394810	23395310
chr18	23376868	23378377
chr2	51573005	51573910
chr2	55053539	55053967
chr13	2314506	2315560
chr13	2311917	2312345
chr13	2310176	2310717
chr13	2293238	2293711
chr13	2292539	2292854
chr13	2280563	2281855
chr19	454287	454980
chr19	459205	460026
chr18	9499567	9499986
chr18	9379984	9380992
chr10	3807343	3807900
chr10	3795246	3795813
chr10	3792231	3792680
chr10	3791561	3791957
chr10	3776608	3777006
chr10	3727252	3727625
chr10	3704186	3704893
chr10	3693752	3694221
chr10	3593823	3594289
chr14	514801	515276
chr23	37770628	37771291
chr23	37766631	37767369
chr19	2264570	2265013
chr19	2273930	2274572
chr19	2289083	2290677
chr12	46120746	46121259
chr19	2116345	2116751
chr25	463470	464407
chr25	449636	450130
chr10	4556350	4556935
chr21	1640095	1640406
Zv9_NA372	96762	97283
Zv9_NA372	86899	87406
Zv9_NA372	85680	86688
Zv9_NA372	82354	83946
Zv9_NA372	50564	51801
Zv9_NA372	48329	48984
Zv9_NA372	5333	6278
chr12	8888431	8889097
Zv9_NA689	13075	13415
chr16	32413381	32414198
chr16	32407325	32407815
chr12	1083472	1084211
chr14	1290062	1290495
chr5	37814516	37815148
chr4	22903259	22904141
chr8	6551014	6551448
Zv9_scaffold3551	44894	45603
chr23	41706086	41706535
chr8	39096927	39097727
chr3	25954733	25955169
chr14	37823226	37823567
chr20	55047762	55048135
chr8	52921241	52922131
chr11	44184033	44184323
Zv9_scaffold3512	55108	55441
Zv9_scaffold3512	55679	56466
Zv9_scaffold3512	56716	57474
Zv9_scaffold3512	60955	61538
Zv9_scaffold3512	66551	69311
Zv9_scaffold3512	75689	76758
Zv9_scaffold3512	76964	77511
Zv9_scaffold3512	81561	82545
Zv9_scaffold3512	82894	85329
Zv9_scaffold3512	85865	86632
Zv9_NA160	9527	10039
chr7	682767	683201
Zv9_NA916	12460	13147
chr9	52786487	52787224
Zv9_scaffold3485	105893	106274
chr3	4360794	4361761
chr2	54285530	54285884
chr16	14336340	14337882
chr16	14324297	14324891
chr16	14215147	14215649
Zv9_scaffold3544	5707	6239
Zv9_scaffold3544	8735	9096
chr1	30723637	30724195
chr1	30719901	30720437
chr1	30664368	30664880
chr1	30688274	30688927
chr1	30696492	30697084
chr1	30705720	30706907
chr15	45694952	45695308
chr2	887632	887879
chr13	49090060	49090577
chr13	49056634	49057147
chr13	49048560	49049532
chr13	9544841	9545896
Zv9_scaffold3495	189536	190075
Zv9_scaffold3495	213364	213720
chr24	74915	75551
chr17	42207237	42208049
chr17	42131517	42132236
chr17	42061361	42061715
chr17	42056348	42057112
chr17	42027924	42028590
chr17	42024669	42025167
chr17	42022882	42023272
chr17	42014470	42015389
chr17	41999827	42001540
chr17	41987673	41988228
chr17	41663201	41663812
chr17	41604041	41604386
chr17	41597506	41597924
chr17	41564781	41565504
chr17	41556941	41557464
Zv9_scaffold3492	213513	214175
Zv9_scaffold3492	179447	179944
Zv9_scaffold3492	127140	127761
Zv9_scaffold3492	29723	30133
Zv9_scaffold3492	26267	26565
chr20	44697810	44698083
chr20	44698299	44698662
Zv9_scaffold3471	15662	16164
Zv9_scaffold3471	108568	109552
Zv9_scaffold3471	117736	118545
Zv9_scaffold3471	135087	135806
Zv9_scaffold3471	410896	411840
Zv9_scaffold3471	416845	417527
chr11	24869943	24870674
chr11	24872931	24874641
chr11	24875162	24875547
chr11	24880186	24880604
chr11	24748028	24748416
chr11	24747191	24747632
chr11	24675328	24675727
chr11	24670911	24672325
chr11	24666613	24667468
chr11	24653237	24654610
chr11	24650992	24651500
chr11	24644204	24644614
chr11	24627148	24627581
Zv9_scaffold3551	57837	58250
Zv9_scaffold3551	51727	52961
Zv9_scaffold3551	224941	225326
Zv9_scaffold3551	209527	209950
Zv9_scaffold3551	186628	187249
Zv9_scaffold3551	153516	154765
Zv9_scaffold3551	145277	146169
Zv9_scaffold3551	119541	120005
Zv9_scaffold3551	101212	101821
Zv9_scaffold3551	79292	79851
Zv9_scaffold3486	112819	113177
chr9	52540036	52540620
chr9	52533171	52533690
chr13	45051692	45052124
chr2	20363188	20363648
chr2	25002797	25003551
chr2	25021590	25021907
chr2	25039233	25040603
chr2	25204132	25204475
chr2	25208887	25209199
chr2	25219704	25220229
chr2	25311767	25312073
chr2	25318232	25318621
chr1	6359541	6359920
Zv9_scaffold3564	108372	108835
Zv9_NA626	12735	13122
Zv9_scaffold3548	267967	268382
Zv9_scaffold3548	131761	132623
chr3	13943544	13943925
chr14	46263263	46263520
chr14	46326327	46327005
chr11	2006118	2007545
chr11	2001534	2002847
chr11	1991910	1992418
chr11	1986310	1986975
chr11	1980369	1980701
chr11	1965444	1966156
chr11	1948737	1949915
chr11	1928932	1929602
chr11	1882171	1883306
Zv9_scaffold3529	86582	87008
chr22	36190137	36190743
chr24	32834251	32834515
Zv9_scaffold3563	207905	208849
Zv9_scaffold3563	251231	251563
chr7	13542300	13542801
chr7	13561863	13562546
chr5	963053	963451
Zv9_scaffold3540	274043	274957
Zv9_scaffold3540	260850	261100
Zv9_scaffold3540	259940	260551
Zv9_scaffold3540	257978	258221
Zv9_scaffold3540	255062	256805
Zv9_scaffold3540	244813	245213
Zv9_scaffold3540	214324	215019
Zv9_scaffold3540	201719	202312
Zv9_scaffold3540	196237	197063
Zv9_scaffold3540	129800	130205
Zv9_scaffold3540	107629	107959
Zv9_scaffold3540	105303	105550
chr5	4943097	4943707
chr5	4862677	4863036
chr5	4816626	4817724
chr6	44845702	44846930
chr6	44799513	44800243
chr6	44778365	44779446
chr6	44729086	44729452
chr6	44724985	44725513
chr16	32541633	32543085
chr16	32523667	32524075
chr16	32506273	32506705
chr16	32503004	32503449
chr16	32501029	32501877
chr16	32467425	32467888
chr16	32436650	32436978
chr16	32430045	32430431
chr16	32425997	32426415
chr11	8414987	8415950
chr16	10317635	10318153
chr16	10292601	10293169
chr16	10261979	10263003
chr20	49919487	49919786
chr20	49907121	49907622
chr20	49825418	49825854
chr20	49813686	49813968
Zv9_scaffold3500	226126	227012
Zv9_scaffold3534	102312	107527
Zv9_scaffold3534	54728	55181
chr9	52918442	52918987
chr9	52937955	52938910
chr9	53020000	53020512
chr9	53074044	53075682
chr9	5251352	5252745
chr16	46812532	46812840
chr5	10319508	10319888
chr5	20936716	20937098
chr5	20941778	20942214
chr12	22254880	22255245
chr12	22122082	22122468
chr17	36490528	36491693
chr17	36485098	36486507
chr17	36470645	36471684
chr17	36422201	36422636
chr17	36398774	36400449
chr17	36360958	36361746
chr17	36354783	36355369
chr23	5403521	5405530
chr23	5396618	5397070
chr23	5371064	5372284
chr23	5369206	5370045
chr23	5362536	5363188
chr23	5330250	5330838
chr23	5561301	5562803
chr23	5577730	5578997
chr23	5584815	5586226
chr23	5589604	5590515
chr8	29457729	29459043
chr8	29448109	29448473
chr8	29439612	29440088
chr9	4816143	4816679
chr9	4830762	4831581
chr9	4904650	4905087
chr9	4925185	4925777
chr14	29208949	29209395
chr9	4937235	4938108
chr1	184675	185512
chr1	195575	196095
chr1	268565	269801
chr1	340569	341055
Zv9_NA908	37448	37968
Zv9_NA908	35800	36231
Zv9_NA908	1986	2854
Zv9_NA144	12391	13315
Zv9_NA144	17406	18771
chr1	523013	523550
chr1	592598	593235
chr1	896507	897005
chr1	791037	791606
chr1	973244	973781
chr1	690206	690762
chr12	2452480	2453390
Zv9_NA256	7930	8525
chr1	1179971	1180488
Zv9_NA456	14167	14754
chr1	1431162	1431687
chr1	1876782	1878334
chr1	1882820	1884187
chr1	1885102	1885583
chr1	1897924	1898822
chr1	1899799	1900923
chr1	2062183	2063270
chr1	2064484	2065286
chr1	2069057	2070497
chr1	2074444	2075687
chr1	2085060	2085691
chr1	2125262	2126425
chr1	2148688	2149154
chr1	2254695	2255164
chr2	2989271	2990095
chr1	2812982	2813679
chr1	2815592	2816111
chr1	3525351	3525835
chr1	3310260	3311032
chr1	3296477	3298189
chr1	3286369	3286991
chr1	4120935	4122021
chr1	4115527	4116919
chr1	4097625	4098575
chr1	4093381	4094512
chr1	4079400	4079865
chr1	4074412	4074937
chr1	4220468	4221772
chr1	4217918	4219727
chr1	4212359	4213490
chr1	4208125	4210997
chr1	4202158	4202888
chr1	4181011	4182170
chr1	4179503	4179893
chr1	4165421	4167045
chr1	4357277	4357848
chr1	4494458	4496490
chr1	4511497	4512072
chr1	4525332	4525990
chr1	4641698	4642407
chr1	4655061	4655581
chr1	5320577	5321182
chr1	5323878	5324922
chr1	5369537	5370487
chr1	6516296	6516851
chr1	6651613	6652184
chr1	6669008	6670771
chr1	6815452	6816001
chr1	6603398	6604412
chr3	12843962	12844572
chr3	12857117	12857928
chr1	7570423	7571041
chr1	7872440	7872929
chr1	8171686	8172455
chr1	8392056	8392515
chr1	8414741	8415265
chr1	8424646	8425226
chr1	8442103	8442856
chr1	8448609	8449771
chr1	8454829	8455998
chr1	8460876	8462078
chr1	8483307	8484010
chr1	8542801	8543404
chr1	4928004	4928609
chr1	4928759	4929600
chr1	4929602	4930135
chr1	4930586	4931165
chr1	4937381	4937919
chr1	4972660	4973138
chr1	4975287	4976170
chr1	9959686	9960259
chr1	10308541	10309078
chr1	10611722	10612624
chr1	10852011	10852563
chr1	10930252	10930770
chr1	11009059	11010457
chr1	11185878	11186993
chr1	11209808	11210560
chr1	11271594	11272122
chr24	37122916	37123463
chr24	37126513	37127216
chr24	37113722	37114516
chr24	37117600	37118521
chr1	4616080	4616613
chr1	4610715	4611264
chr1	4605211	4606179
chr1	4586501	4587256
chr1	4581027	4581573
chr1	12181470	12182183
chr1	12184054	12185794
chr1	12187452	12189093
chr1	12191164	12191975
chr1	12192941	12193521
chr1	12195185	12196129
chr1	12202955	12204021
chr1	12241134	12242777
chr1	12245313	12246171
chr1	12254557	12255311
chr1	12292591	12293877
chr1	12407996	12408497
chr1	13517309	13517808
chr1	13545466	13546001
chr1	13879716	13880329
chr1	14009084	14009690
chr1	14013089	14013625
chr1	14106507	14107550
chr1	14109277	14110114
chr1	14246842	14247508
chr1	14885579	14886250
chr1	15161278	15161831
chr1	15169059	15170083
chr1	15175985	15176598
chr1	15190892	15191800
chr1	15335954	15336971
chr1	15335417	15335941
chr1	15312709	15314325
chr1	15280051	15280830
chr1	15603228	15603732
chr1	15718274	15718907
chr1	15766527	15767825
chr1	15836230	15836814
chr1	15836982	15837515
chr1	15864865	15866223
chr1	15898621	15899242
chr1	15942010	15942774
chr1	15944213	15944625
chr1	15995795	15996291
chr1	16060867	16061515
chr1	16064592	16065481
chr1	16092667	16093200
chr1	16097283	16098098
chr1	16099900	16100521
chr1	16128514	16129140
chr1	16140401	16141684
chr1	16142586	16143761
chr1	16151820	16153616
chr1	16166383	16166913
chr1	16170648	16172796
chr1	16190649	16191229
chr1	16199970	16200477
chr1	16200497	16201284
chr1	16300295	16301039
chr1	16307416	16307922
chr1	16315225	16317823
chr1	16371701	16372968
chr1	16387601	16388881
chr1	16426372	16427041
chr1	17183029	17183527
chr1	17347927	17348922
chr1	17349497	17350854
chr1	17399562	17400213
chr1	17453788	17454564
chr1	17454832	17455286
chr1	17458128	17458608
chr1	17485392	17486008
chr1	17596473	17597391
chr1	17608959	17609743
chr1	17611135	17611907
chr1	17621424	17622264
chr1	17626720	17627696
chr1	17639568	17640095
chr1	17641046	17643273
chr1	17653057	17654097
chr1	17659505	17660557
chr1	17718789	17719549
chr1	17740538	17741068
chr1	17743688	17744269
chr1	17762410	17762959
chr1	18007663	18008455
chr1	18080429	18081190
chr1	18133058	18133558
chr1	18139361	18140400
chr1	18149241	18149754
chr1	18398371	18399799
chr1	18405621	18406268
chr1	18462765	18463359
chr1	18631336	18633322
chr1	18668508	18669643
chr1	18675418	18678216
chr1	18705837	18706582
chr1	18863883	18864331
chr1	18882504	18883185
chr1	19059595	19060162
chr1	19060178	19060949
chr1	19088957	19090254
chr1	19272111	19272633
chr1	19370265	19370612
chr1	19424034	19424833
chr1	19594290	19594846
chr1	19594988	19595550
chr1	19619288	19619788
chr1	19672243	19673525
chr1	19962538	19963701
chr1	19980304	19980878
chr1	20038591	20039061
chr1	20312051	20312786
chr1	20359168	20359786
chr1	20397771	20398181
chr1	20423240	20423601
chr1	20532512	20533778
chr1	20576445	20577530
chr1	20596577	20599188
chr1	20633712	20634209
chr1	20635032	20635815
chr1	20656585	20657214
chr1	21441739	21442476
chr1	21444759	21445467
chr1	29678898	29679930
chr1	29671570	29672095
chr1	29461061	29461675
chr1	29233527	29234041
chr1	29154030	29154716
chr1	28871805	28872922
chr1	28861265	28861991
chr1	28860621	28861195
chr1	28838454	28840107
chr1	28818238	28818700
chr1	28815369	28817151
chr1	28783949	28784815
chr1	28779769	28781032
chr1	28672456	28672758
chr1	28653439	28654425
chr1	28629392	28630005
chr1	28604336	28604846
chr1	28603509	28604265
chr1	28591720	28592206
chr1	28169093	28169517
chr1	28157809	28158626
chr1	28150191	28151849
chr1	28136910	28137419
chr1	22736436	22737179
chr1	22765040	22765475
chr1	22772927	22773458
chr1	22809248	22810523
chr1	22817917	22818851
chr1	22828593	22829162
chr1	22869618	22870207
chr1	22876651	22878010
chr1	22934372	22935192
chr1	22942628	22943296
chr1	22951517	22952149
chr1	22991982	22992659
chr1	23190760	23191205
chr1	23063032	23063696
chr1	23336175	23336661
chr1	23343089	23343598
chr1	23561900	23562347
chr1	23667984	23668689
chr1	23674826	23676669
chr1	23678943	23679634
chr1	23688323	23689478
chr1	23719159	23719818
chr1	23739760	23741442
chr1	23747623	23749245
chr1	23751031	23751566
chr1	23758593	23759620
chr1	23778446	23779160
chr1	23782765	23786569
chr1	23789197	23789995
chr1	23791908	23793409
chr1	23794873	23795652
chr1	23802987	23804399
chr1	23934548	23935075
chr1	23950739	23951428
chr1	23951564	23952189
chr1	23952325	23953820
chr1	24084441	24085114
chr1	24102389	24103356
chr1	24192969	24193519
chr1	24221660	24222159
chr1	24356539	24357059
chr1	24369114	24369543
chr1	24377895	24378482
chr1	24378620	24379937
chr1	24762629	24763226
chr1	24768755	24769553
chr1	21526354	21526967
chr1	21703061	21703539
chr1	21863934	21864436
chr1	21869481	21869955
chr1	21874147	21874922
chr1	21887906	21889117
chr1	22320551	22321661
chr1	22355798	22356713
chr1	22435733	22436336
chr1	22447516	22449083
chr1	22449156	22449658
chr1	22517159	22517660
chr1	22562983	22563732
chr1	22567857	22570372
chr1	22570451	22571949
chr1	22582684	22584293
chr1	22587862	22589389
chr1	22590675	22592845
chr1	22594023	22595026
chr1	22595576	22597980
chr1	22600460	22601384
chr1	22601532	22602119
chr1	22605387	22606032
chr1	22608490	22609525
chr1	22611808	22614256
chr1	22617745	22619749
chr1	27532200	27532682
chr1	24902428	24902989
chr1	25117191	25118157
chr1	25249321	25254534
chr1	25711762	25712269
chr1	25794404	25795208
chr1	25800530	25801374
chr1	25811227	25811970
chr1	25842288	25842884
chr1	25847065	25848705
chr1	25880842	25881730
chr1	25882144	25882658
chr1	25885925	25886791
chr1	25925473	25925965
chr1	25994327	25995588
chr1	26003804	26009494
chr1	26014990	26017003
chr1	26018437	26020057
chr1	26058778	26059888
chr1	26060087	26060739
chr1	26064130	26065213
chr1	26080346	26080813
chr1	26085741	26086283
chr1	26089415	26089920
chr1	26094002	26098166
chr1	26099380	26100572
chr1	26106622	26107921
chr1	26112978	26114206
chr1	26116886	26118172
chr1	26139294	26142022
chr1	26148095	26148791
chr1	26168438	26170150
chr1	26449852	26450851
chr1	26770623	26771149
chr1	26846730	26847259
chr1	22716666	22717843
chr1	30382989	30383625
chr1	30365657	30367280
chr1	30329220	30329949
chr1	30326839	30327769
chr1	30324798	30326184
chr1	30312037	30312699
chr1	30295933	30296434
chr1	30267710	30268414
chr1	30246918	30247571
chr1	30175105	30175591
chr1	30082782	30083568
chr1	30071772	30073458
chr1	30045339	30046179
chr1	30042321	30043141
chr1	30913576	30914345
chr1	31001951	31002555
chr1	31002564	31003196
chr1	31290686	31291766
chr1	31303370	31303977
chr1	31350002	31350423
chr1	32065047	32065569
chr1	32113781	32114221
chr1	31422636	31423231
chr1	32596992	32597377
chr1	32916382	32916920
chr1	32927520	32928238
chr1	32979574	32980097
chr1	33026843	33027357
chr1	33609549	33610177
chr1	33967835	33968467
chr1	34103563	34104489
chr1	34135771	34136189
chr1	34139259	34140388
chr1	34236125	34236533
chr1	34260177	34260627
chr1	34260628	34261296
chr1	34299711	34300614
chr1	34301316	34302016
chr1	34302203	34302706
chr1	37150204	37150782
chr1	37094994	37095616
chr1	37088242	37088939
chr1	37086092	37086706
chr1	37073722	37074394
chr1	36777229	36778195
chr1	36771690	36772350
chr1	36729541	36729966
chr1	36722987	36723806
chr1	36705199	36705755
chr1	36490050	36490986
chr1	36412575	36413405
chr1	36386273	36386721
chr1	36242209	36242680
chr1	36116007	36116896
chr1	36090887	36091659
chr1	36064428	36065284
chr1	35993969	35994535
chr1	35918105	35919207
chr1	35915232	35916257
chr1	35887269	35888202
chr1	35881120	35881837
chr1	35852543	35853663
chr1	35842894	35844122
chr1	35836296	35837822
chr1	35828883	35830109
chr1	35823923	35824448
chr1	35784287	35785260
chr1	35777972	35779118
chr1	35767502	35768454
chr1	35764192	35765514
chr1	35740831	35741386
chr1	35722785	35723725
chr1	35721107	35722170
chr1	35684223	35684651
chr1	35646045	35646646
chr1	35641557	35642248
chr1	35629570	35630742
chr1	35626792	35627969
chr1	35619100	35619646
chr1	35617734	35618694
chr1	35588391	35588976
chr1	35555473	35555992
chr1	35518468	35518960
chr1	35516110	35517778
chr1	35514757	35516109
chr1	35510126	35511153
chr1	35508832	35509788
chr1	35507030	35507997
chr1	35490950	35491468
chr1	35482482	35483309
chr1	35478742	35479316
chr1	35470248	35471225
chr1	35463657	35464157
chr1	35453573	35454230
chr1	35440281	35441650
chr1	35437558	35438322
chr1	35424498	35425688
chr1	35409392	35409953
chr1	35405527	35407146
chr1	35385023	35385596
chr1	35380605	35381243
chr1	35376513	35377026
chr1	35373293	35374443
chr1	35371909	35372968
chr1	35364239	35365341
chr1	35353222	35353915
chr1	35350133	35352216
chr1	35348992	35350048
chr1	35338708	35341184
chr1	35338043	35338553
chr1	35327789	35328773
chr1	35295569	35296364
chr1	35282354	35283137
chr1	35280795	35281753
chr1	35260231	35260804
chr1	35258861	35259769
chr1	35257310	35258424
chr1	35255105	35255657
chr1	35237223	35238707
chr1	35235847	35236351
chr1	35234709	35235830
chr1	35234071	35234629
chr1	35228481	35230123
chr1	35222396	35223333
chr1	35221843	35222110
chr1	35210551	35212407
chr1	35208381	35209034
chr1	35196052	35196563
chr1	39052764	39054204
chr1	39055251	39055879
chr1	39105834	39106420
Zv9_NA708	17023	17505
Zv9_NA708	13493	14245
chr1	38810026	38810403
chr1	38788317	38788963
chr1	38735582	38735997
chr1	38712662	38713539
chr1	38689326	38690177
chr1	38651030	38651400
chr1	38561696	38562755
chr1	38537690	38538131
chr1	38502796	38503829
chr1	38496166	38496619
chr1	38463560	38464837
chr1	38457024	38457614
chr1	38281110	38281950
chr1	38198985	38199488
chr1	40885896	40886788
chr1	40846611	40848451
chr1	40839293	40840048
chr1	40823046	40825097
chr1	40815526	40817352
chr1	40811921	40813456
chr1	40808141	40809887
chr1	40806539	40807299
chr1	40805288	40806122
chr1	40797998	40798522
chr1	40790452	40792456
chr1	40787589	40789008
chr1	40783735	40785016
chr1	40782584	40783677
chr1	40776540	40778430
chr1	40769661	40770141
chr1	40768941	40769542
chr1	40765254	40766440
chr1	40754312	40755615
chr1	40748824	40749352
chr1	40745253	40746596
chr1	40741901	40742737
chr1	40737169	40739770
chr1	40734576	40735900
chr1	40692567	40693772
chr1	40601907	40602498
chr1	40548721	40549239
chr1	40474238	40475517
chr1	40468676	40469527
chr1	40466182	40468642
chr1	40329208	40330027
chr1	40323160	40323847
chr1	40320661	40322169
chr1	40317401	40318499
chr1	40310573	40311343
chr1	40285921	40286732
chr1	40277406	40278137
chr1	40276868	40277401
chr1	40234677	40236110
chr1	40124191	40124751
chr1	40107482	40108296
chr1	39863616	39864489
chr1	39855291	39856134
chr1	39853755	39854308
chr1	39845279	39846771
chr1	39801263	39801991
chr1	39754416	39754879
chr1	39708902	39709646
chr1	39694065	39694587
chr1	39677019	39677624
chr1	39667306	39667893
chr1	39660649	39661448
chr1	39587411	39588005
chr1	39564445	39564933
chr1	39557230	39557865
chr1	39554361	39554888
chr1	39520842	39521867
chr1	39505235	39505854
chr1	39484472	39485108
chr1	39443164	39443650
chr1	39383102	39383705
chr1	39361469	39362039
chr1	39323658	39324157
chr1	39316696	39317376
chr1	39228164	39229672
chr1	41159181	41159736
chr1	41203688	41204719
chr1	41267120	41268650
chr1	41276001	41276469
chr1	41281994	41282975
chr1	41500955	41501572
chr1	41502237	41502677
chr1	41559895	41561022
chr1	41645992	41646827
chr1	41897472	41899157
chr1	44685515	44686438
chr1	44984488	44985328
chr1	45073197	45073712
chr1	45122495	45123044
chr1	45328945	45329459
chr1	45850081	45850637
chr1	45923531	45923993
chr1	45956934	45957519
chr1	45973380	45974732
chr1	46067848	46068391
chr1	46072065	46072517
chr1	46073846	46076187
chr1	46190720	46192152
chr1	46196249	46199002
chr1	46200799	46202237
chr1	46230783	46233560
chr1	46237354	46238562
chr1	46249585	46251052
chr1	46251524	46252106
chr1	46257814	46258688
chr1	46293766	46294270
chr1	46490890	46491509
chr1	42035097	42036089
chr1	42040994	42041508
chr1	42041523	42041940
chr1	42147218	42147889
chr1	42158120	42159089
chr1	42160151	42161130
chr1	42161918	42162444
chr1	42177005	42181999
chr1	42189701	42190768
chr1	42210633	42211173
chr1	42325371	42325824
chr1	42741234	42741911
chr1	42776795	42777599
chr1	42799889	42800554
chr1	42837543	42838315
chr1	42840395	42841052
chr1	42848771	42849188
chr1	42884640	42885166
chr1	42896496	42897342
chr1	42913364	42913954
chr1	43038754	43040017
chr1	43094251	43094762
chr1	43094928	43095785
chr1	43097682	43099111
chr1	43125789	43126460
chr1	43134656	43135179
chr1	43137660	43138257
chr1	43157991	43158611
chr1	43175124	43175684
chr1	43194847	43195654
chr1	43200157	43200981
chr1	43351101	43351582
chr1	43407540	43408166
chr1	43450477	43451095
chr1	43959190	43960961
chr1	44041105	44041945
chr1	44117007	44117578
chr1	44133321	44133974
chr1	44395063	44395776
chr1	46544868	46545366
chr1	46547246	46547890
chr1	46549553	46550193
chr1	46550483	46551139
chr1	46555819	46556381
chr1	46562815	46563502
chr1	46580009	46580531
chr1	46580605	46581004
chr1	46605412	46606127
chr1	46609560	46610038
chr1	46614243	46615056
chr1	46622566	46623081
chr1	46639368	46640156
chr1	46659489	46660437
chr1	46669000	46670456
chr1	46772087	46773544
chr1	46844884	46845537
chr1	46848946	46849918
chr1	46853885	46854382
chr1	46864632	46865087
chr1	46865137	46866119
chr1	46949027	46949855
chr1	46956140	46956677
chr1	46958021	46958981
chr1	46972657	46973178
chr1	46988906	46989317
chr1	47027252	47027823
chr1	47040785	47042503
chr1	47047376	47048420
chr1	47053552	47054532
chr1	47139439	47140140
chr1	47187382	47188500
chr1	47192227	47193275
chr1	47197042	47197571
chr1	47250433	47251519
chr1	47269166	47269739
chr1	47436687	47437265
chr1	47453860	47454469
chr1	47460850	47461517
chr1	47494503	47495105
chr1	47572126	47573642
chr1	47574102	47576875
chr1	47598138	47598617
chr1	47635081	47635603
chr1	47715075	47715642
chr1	47718237	47719840
chr1	47721915	47722420
chr1	47722794	47723905
chr1	47737159	47738550
chr1	47747159	47747731
chr1	47776276	47776802
chr1	47778394	47779381
chr1	47795580	47796498
chr1	47796923	47798628
chr1	47813482	47814131
chr1	47834608	47835228
chr1	47876379	47878103
chr1	47964006	47965064
chr1	47959871	47960875
chr1	47916666	47917170
chr1	48018783	48019944
chr1	48021113	48021746
chr1	48024067	48024968
chr1	48033735	48034240
chr1	48034499	48035022
chr1	48047108	48047582
chr1	48091224	48091833
chr1	48093008	48093498
chr1	48117705	48118708
chr1	48135096	48135615
chr1	48137200	48137761
chr1	48206360	48207146
chr1	48218385	48218944
chr1	48223636	48224133
chr1	48249048	48249483
chr1	49906417	49906968
chr1	49902813	49903772
chr1	49855421	49856018
chr1	49845591	49846477
chr1	49843353	49843813
chr1	49837956	49839132
chr1	49834412	49835606
chr1	49828963	49829496
chr1	49824580	49825563
chr1	49821255	49822385
chr1	49818792	49820030
chr1	49797482	49798874
chr1	49768526	49769025
chr1	49728859	49729491
chr1	49715304	49715815
chr1	49573509	49574395
chr1	49275759	49276189
chr17	10748851	10749348
chr17	10765002	10766273
chr17	10769533	10770883
chr17	10778193	10778769
chr17	10782945	10784374
chr17	10797448	10798150
chr17	10800963	10801770
chr17	10810417	10811344
chr1	48948575	48949205
chr1	48957267	48957923
chr1	50247574	50248204
chr1	50286142	50286597
chr1	50300055	50300722
chr1	50325974	50326865
chr1	50327715	50328710
chr1	50331967	50332571
chr1	50339782	50340242
chr1	50342546	50344289
chr1	50352175	50353477
chr1	50355488	50356476
chr1	50375203	50376400
chr1	50376446	50377105
chr1	50387355	50387876
chr1	50402743	50404225
chr1	50479583	50480181
chr1	50480214	50480950
chr1	50621638	50622191
chr1	50733624	50734155
chr1	50807550	50807948
chr1	50861277	50861728
chr1	50998394	50998953
chr1	51012427	51012949
chr1	51199815	51200698
chr1	51205648	51206253
chr1	51239759	51241001
chr1	51244652	51245491
chr1	51387218	51387787
chr1	51391634	51392081
chr1	51401186	51402351
chr1	51403447	51404299
chr1	51423911	51424540
chr1	51595489	51596382
chr1	51596511	51597012
chr1	51597190	51597809
chr1	51759696	51760192
chr1	51692343	51694182
chr1	51660219	51661046
chr1	51646624	51647142
chr1	52024966	52025403
chr1	52021722	52023015
chr1	52019661	52020317
chr1	52018188	52018651
chr1	52014979	52016811
chr1	52012395	52013775
chr1	52007540	52009331
chr1	52000073	52001322
chr1	51940280	51940809
chr1	51929819	51930483
chr1	52231421	52231931
chr1	52248354	52249006
chr1	52309128	52309875
chr1	52393675	52394446
chr1	52465861	52466851
chr1	52732937	52733370
chr1	52769129	52770074
chr1	52814389	52814953
chr1	53479415	53480064
chr1	53499866	53500588
chr1	53500685	53501056
chr1	53525852	53526378
chr1	53542863	53543602
chr1	53758163	53758759
chr1	53825312	53825967
chr1	54509408	54509918
chr1	54566248	54567646
chr1	54598291	54598921
chr1	54947159	54947633
chr1	54807709	54808332
chr1	55715835	55716643
chr1	55687577	55688122
chr1	55528607	55531096
chr1	55460345	55461413
chr1	55813462	55814639
chr1	56547667	56548209
chr1	56873826	56874384
chr1	56881195	56882042
chr1	54721575	54722074
chr1	54718640	54719616
chr1	53161516	53162014
chr1	53084945	53085467
chr1	52994354	52994983
chr1	52919829	52920407
chr1	52912580	52913295
chr1	52900834	52901362
chr1	52894700	52895239
chr1	57274249	57274682
chr1	57659586	57660335
chr1	57653172	57653963
chr1	57638493	57639597
chr1	57631719	57632368
chr1	58711049	58711786
chr1	58834410	58835018
chr1	59948021	59948601
chr1	60156543	60157183
chr10	159158	159586
chr10	149165	149820
chr10	140028	141100
chr8	258609	259117
chr10	1011501	1011974
chr10	87135	87597
chr10	247825	248362
chr10	267322	267786
chr10	293968	294817
chr10	333087	333572
chr10	338136	339057
chr10	490951	491633
chr10	952364	953547
chr10	953920	954586
chr10	729718	730670
chr10	738592	739305
chr10	745364	746503
chr10	746848	747319
chr10	756770	757584
chr10	759957	760434
chr10	769468	770312
chr10	794301	795059
chr10	812723	813291
chr10	856991	857410
chr10	717069	717635
chr10	608603	609061
chr10	2679875	2680329
chr10	1239409	1239990
chr10	1255317	1256550
chr10	1256744	1257276
chr10	1264694	1265190
chr10	1272719	1273681
chr10	1277849	1279594
chr10	986244	987074
chr10	967442	967897
chr10	973248	974291
chr10	1119192	1119982
chr10	1127140	1127999
chr10	1502224	1503208
chr10	1534287	1535235
chr10	1778568	1779817
chr10	1783195	1783677
chr10	1822686	1823238
chr10	1835520	1836977
chr10	2959517	2960290
chr10	4131762	4133208
chr10	4135769	4136278
chr10	4175936	4176723
chr10	4188707	4189871
chr10	4191981	4192867
chr10	4195049	4195995
chr10	4198386	4199086
chr10	4209281	4210778
chr10	3889677	3890468
chr10	4274361	4275075
chr10	4276666	4277453
chr10	4611514	4612118
chr10	4629781	4630704
chr10	4635694	4636879
chr10	4648616	4649077
chr10	4681352	4682680
chr10	4691629	4692335
chr10	4706280	4707176
chr10	4708347	4709036
chr10	4718367	4718753
chr10	4742817	4743321
chr10	4766533	4767161
chr10	4786452	4787265
chr10	4868381	4869443
chr10	4882522	4883357
chr10	4886058	4886626
chr10	4888862	4890773
chr10	4923769	4924300
chr10	4935788	4936419
chr10	5323161	5324080
chr10	5329037	5329622
chr10	5334848	5336787
chr10	5347356	5348450
chr10	5367319	5367872
chr10	5381657	5382161
chr10	5385339	5386357
chr10	5453844	5454787
chr10	5473469	5474070
chr10	5477933	5479093
chr10	5486480	5487121
chr10	5489287	5490185
chr10	5495429	5496798
chr10	5503002	5503775
chr10	8601347	8601836
chr10	8150958	8152749
chr10	8013240	8013859
chr10	7921413	7922009
chr10	7900095	7901165
chr10	7856702	7857318
chr10	6531683	6532362
chr10	7386279	7386890
chr10	7358078	7358829
chr10	7352800	7353503
chr10	6932477	6932972
chr10	8779465	8779935
chr10	8803131	8803510
chr10	8805090	8805759
chr10	8841399	8842157
chr10	8863018	8863437
chr10	9125273	9126355
chr10	9236038	9236755
chr10	9254975	9255547
chr10	9456470	9457238
chr10	9483514	9484244
chr10	9513161	9513679
chr10	9568006	9569524
chr10	9618055	9619463
chr10	9630676	9631894
chr10	9635304	9636451
chr10	9648726	9649247
chr10	9649479	9650008
chr10	9651307	9651985
chr10	9681366	9681993
chr10	9759944	9761105
chr10	8714724	8715260
chr10	8706168	8706649
chr10	14831293	14831877
chr10	14837446	14838641
chr10	14933649	14934412
chr10	15040451	15040920
chr10	15108913	15109803
chr10	15311021	15311526
chr10	15379402	15379996
chr10	15426056	15427173
chr10	15496527	15497312
chr10	15514100	15514610
chr10	15517031	15517889
chr10	15523339	15525277
chr10	15529152	15530482
chr10	15558678	15559175
chr10	15617039	15617951
chr10	15816439	15816907
chr10	15942521	15943020
chr10	16129974	16130893
chr10	16165300	16166360
chr10	16234640	16235037
chr10	16242534	16243772
chr10	16262119	16263620
chr10	13208917	13209680
chr10	13336104	13336806
chr10	13339445	13340388
chr10	13442141	13442673
chr10	13495462	13496144
chr10	13508120	13509324
chr10	13511403	13512715
chr10	13517900	13520602
chr10	13520605	13522602
chr10	13544563	13545020
chr10	13584511	13585080
chr10	13635762	13637228
chr10	13711210	13711841
chr10	13744051	13744526
chr10	14327936	14328425
chr10	14420373	14420963
chr10	11671506	11672012
chr10	11650759	11652428
chr10	11643680	11644190
chr10	11641064	11641610
chr10	11629308	11630168
chr10	11578813	11579366
chr10	11557320	11557842
chr10	11419373	11421732
chr10	11223124	11223772
chr10	11213735	11214318
chr10	11197736	11198523
chr10	11195055	11196273
chr10	11181402	11182019
chr10	11178514	11178968
chr10	11159182	11159712
chr10	11158518	11159058
chr10	11140719	11141099
chr10	11040393	11041115
chr10	11035160	11036368
chr10	10923413	10924092
chr10	10906455	10907092
chr10	10900771	10902054
chr10	10878166	10879339
chr10	10874190	10876619
chr10	10872624	10873522
chr10	10867062	10871339
chr10	10864495	10865113
chr10	10862061	10864233
chr10	10853959	10854570
chr10	10853191	10853828
chr10	10851761	10852685
chr10	10835542	10836021
chr10	10834896	10835397
chr10	10820429	10822168
chr10	10815986	10816811
chr10	10809425	10810970
chr10	10802179	10804106
chr10	10790606	10791422
chr10	10786603	10787195
chr10	10729237	10730121
chr10	10607139	10608475
chr10	10288943	10290579
chr10	10285808	10286809
chr10	10259948	10260859
chr10	10220220	10221027
chr10	10204797	10205356
chr10	10184650	10186111
chr10	10179938	10180617
chr10	10179222	10179896
chr10	10088533	10089183
chr10	10047405	10047914
chr10	9976268	9977465
chr10	9973306	9973695
chr10	9950056	9950767
chr10	9942346	9942887
chr10	9911361	9911803
chr10	9880919	9881474
chr10	9871873	9872872
chr10	19084018	19084569
chr10	19080425	19080919
chr10	19073460	19073966
chr10	19066274	19067989
chr10	19063814	19064527
chr10	19060756	19061703
chr10	19041268	19041944
chr10	18572891	18573559
chr10	18454121	18454666
chr10	18449365	18449926
chr10	18230741	18231526
chr10	17683218	17683605
chr10	17675358	17676194
chr10	17657880	17658463
chr10	17475835	17476865
chr10	17427035	17427789
chr10	23011342	23011896
chr10	23015213	23016139
chr10	23037148	23037616
chr10	22831638	22832407
chr10	22822340	22824078
chr10	22813252	22814104
chr10	22748494	22749089
chr10	22593885	22594393
chr10	22522284	22522889
chr10	22515045	22515560
chr10	22448152	22449500
chr10	22288721	22289290
chr10	22262293	22263076
chr10	22250445	22251508
chr10	22212338	22213268
chr10	21259347	21259840
chr10	21171974	21172621
chr10	21128491	21128918
chr10	21064871	21065348
chr10	21056117	21057169
chr10	20967158	20967732
chr10	20818417	20819343
chr10	20608587	20609102
chr10	20600241	20600848
chr10	20478829	20480584
chr10	20476021	20476536
chr10	20473039	20473656
chr10	20468537	20469224
chr10	20377705	20378229
chr10	20269941	20270441
chr10	20262272	20264552
chr10	20238659	20239006
chr10	20158436	20159399
chr25	2453641	2454906
chr10	25986189	25986950
chr10	26205847	26206417
chr10	26206446	26206966
chr10	26227726	26228496
chr10	26248766	26250156
chr10	26258909	26259677
chr10	26263494	26264336
chr10	26266013	26266985
chr10	26268502	26269450
chr10	26273196	26274143
chr10	26280815	26283154
chr10	26286641	26288239
chr10	26311659	26312244
chr10	26313419	26314498
chr10	26325893	26326553
chr10	26717686	26718199
chr10	26718368	26718924
chr10	26852275	26853736
chr10	26855273	26856217
chr10	26856661	26857228
chr10	26964951	26965612
chr10	26966059	26966800
chr10	26968245	26969525
chr10	26971278	26971798
chr10	26982333	26982814
chr10	26985143	26985661
[truncated: 21,421 more rows]

## Sheet: Table_S22
PDREs_Zv9_48hpf
chr17	26340439	26340969
chr21	4122530	4123031
chr5	73278301	73278801
chr5	73264668	73265284
chr2	39820739	39822731
chr2	39818840	39819467
chr2	39808853	39809420
chr12	44752815	44753330
chr23	1182507	1183130
chr23	16192130	16193098
chr13	5813923	5815170
chr3	43715337	43716034
chr3	43712615	43713307
Zv9_NA576	28240	28817
chr25	6198365	6198992
chr21	704908	705403
chr6	59235791	59236416
Zv9_NA322	17076	17618
Zv9_NA322	79171	80113
chr20	54923832	54924413
chr18	36844691	36845249
chr13	35469987	35470430
chr23	37079441	37079853
chr23	37096087	37096709
chr23	37098644	37099586
chr19	2246182	2246732
chr1	35136897	35137373
chr22	38769337	38769855
chr13	42773671	42774233
chr14	37882127	37882846
chr14	37888389	37889056
chr18	11059281	11059749
Zv9_scaffold3563	285703	286511
chr16	40226960	40227602
chr16	40212699	40213533
chr17	4433039	4433588
chr5	11987716	11988331
chr20	45322851	45323344
chr25	38485185	38485728
chr11	40640220	40640774
chr12	3789183	3790163
chr5	34134359	34135262
chr5	34136363	34136937
chr2	59652150	59653091
chr18	43590432	43590949
Zv9_NA766	16141	16821
Zv9_NA766	9828	10438
chr24	412812	413697
chr15	42435537	42436037
chr19	2944999	2945723
chr16	46477770	46478259
Zv9_NA479	33025	33612
Zv9_NA479	31059	31608
chr5	5493659	5494412
chr10	17305506	17306771
chr10	17314614	17315119
chr10	17353604	17354565
chr10	17395693	17396178
chr11	44305264	44305841
chr11	44299441	44299996
chr1	52076135	52077081
chr13	21078756	21079317
chr7	29274881	29275548
chr7	29212816	29213304
chr12	41265359	41266037
chr2	51381267	51381818
chr2	46143425	46144022
chr12	1874788	1875145
chr6	56727892	56728420
chr24	35555186	35556059
chr24	35561061	35561631
chr24	35588564	35589135
Zv9_NA717	13984	14460
chr9	40917867	40918464
chr6	3243658	3244344
chr13	45913123	45913651
chr17	9619243	9619804
chr17	9577670	9578163
chr17	9571450	9571972
chr17	9569645	9570221
chr17	9265624	9266123
chr18	49428942	49429505
chr18	49430200	49430898
chr18	49459049	49459606
chr13	53039530	53040150
chr11	2036950	2037825
chr11	2085486	2086262
chr2	19698358	19698916
chr2	7447961	7448356
chr6	2049805	2050563
chr6	2047898	2048508
chr2	47132248	47132830
chr2	47027280	47028202
chr18	25852705	25853405
chr20	7163482	7164001
chr16	52318336	52318953
chr16	52269340	52270001
chr16	52236785	52237346
chr16	52185117	52185721
chr20	45273089	45273623
Zv9_NA202	20526	21080
chr18	1734041	1734979
chr11	46562289	46563054
chr14	3756571	3757090
chr22	38632783	38633348
chr11	21225827	21226540
chr20	1932218	1932745
chr22	1154506	1155016
chr22	1085938	1086709
chr23	5160483	5161245
chr8	1412729	1413555
chr4	6477005	6477632
Zv9_NA46	3268	3925
chr3	48755230	48755873
chr17	49978344	49978981
chr9	45180503	45181046
chr9	4546175	4546786
chr21	42650047	42650557
chr21	43201701	43202215
chr6	1376998	1377499
chr8	1231158	1231598
Zv9_NA683	28327	29047
Zv9_NA760	873	1385
Zv9_NA48	3609	4253
chr11	46481667	46482154
chr1	829502	830044
Zv9_NA181	2978	3526
Zv9_NA181	3691	4476
chr14	5177564	5178364
chr11	35003237	35003754
chr24	43392282	43393157
chr24	43377508	43378045
chr9	41322212	41322636
chr2	605871	606603
chr2	627640	628195
chr2	649543	650048
chr2	664162	664725
chr25	34447775	34448459
chr13	50533098	50533779
chr3	9249989	9250428
chr7	40736208	40736703
chr14	29753551	29754063
chr8	50581487	50582512
chr19	46749633	46750196
Zv9_scaffold3500	52164	53018
Zv9_scaffold3500	16673	17226
chr25	34773261	34774367
chr25	34764906	34765654
chr25	34720290	34720966
chr4	3476499	3477155
chr20	45648972	45649726
chr7	72864266	72864989
chr17	50165790	50166343
chr9	41043733	41044288
Zv9_NA460	6021	6728
chr13	21204360	21205351
chr12	2252196	2252912
chr9	2403192	2403759
chr16	53901554	53902177
chr24	38765469	38765940
chr6	2312922	2313444
chr17	48438539	48439409
chr8	8466468	8467129
chr8	50535793	50536498
chr16	53853999	53854549
chr3	61120810	61121335
chr16	50355505	50356136
chr1	4694733	4695439
chr1	4697806	4698534
chr1	4794251	4794948
chr1	4890068	4890667
chr1	4875778	4876288
chr2	28413355	28413803
chr2	28409306	28410139
chr18	45994694	45995891
chr1	4778492	4779050
chr16	55381354	55382273
chr16	55390012	55390497
chr16	55422766	55423552
chr15	6199814	6200665
chr15	6203767	6204868
chr15	6207191	6208521
chr12	8033768	8034295
chr12	8022373	8022811
chr23	38973497	38974368
chr23	38978416	38978924
chr23	38980162	38980799
chr23	38984517	38985125
chr23	38986890	38987306
chr23	38991049	38991499
chr23	39244865	39245627
chr23	39248454	39249077
chr23	39301322	39301788
chr13	53059227	53059819
chr6	59917677	59918226
chr14	1095355	1096211
chr14	256847	257248
chr15	45644690	45645219
chr5	153938	154569
chr20	3861152	3861600
chr11	41353057	41353620
chr2	57121235	57121789
chr4	4513589	4514408
chr4	4546320	4546949
chr4	4548334	4548952
chr4	4559862	4560481
chr13	864121	864694
chr13	823829	824285
chr5	731316	731811
chr12	45418139	45418722
Zv9_NA48	143194	143736
chr1	35173472	35174081
chr2	41432677	41433249
chr2	41429571	41430522
chr7	65242987	65243940
Zv9_NA722	194162	194568
chr2	55556376	55556837
chr5	5785877	5786328
Zv9_NA130	82452	83126
chr19	30146656	30147276
chr12	49151765	49152348
chr6	59649973	59650787
chr16	3057138	3057764
chr16	3062512	3063238
chr23	38333452	38335279
chr2	20275197	20275918
Zv9_NA101	15302	15953
Zv9_NA101	19454	20487
Zv9_NA101	25756	26576
chr19	5192785	5193338
chr15	42209695	42210087
chr6	2111868	2112635
chr3	61251832	61252339
chr10	45733627	45734107
chr13	52151449	52152119
chr21	25225112	25225878
chr13	52236794	52237466
chr21	25230547	25231293
Zv9_NA593	5935	6497
chr9	2444086	2444889
chr15	2989569	2990203
chr18	45537896	45538356
Zv9_NA761	27631	28371
Zv9_NA280	3648	4212
chr16	3134137	3134623
chr13	47145307	47145925
chr13	47113648	47114337
chr12	48818943	48819542
Zv9_NA372	156198	156768
Zv9_NA372	161054	161637
Zv9_NA372	200969	201308
Zv9_NA372	204705	205453
chr5	19009486	19010071
chr5	19002146	19003074
chr5	18986220	18986964
chr5	18979751	18980295
chr5	18977540	18978055
chr4	59631135	59631661
chr15	43607263	43608010
chr22	34318794	34319759
Zv9_NA810	23910	24402
chr20	45127092	45128045
chr20	45134174	45135090
chr20	45138354	45139173
chr20	45161339	45161809
chr23	41265718	41266158
chr16	52630130	52631423
chr11	44596565	44597071
chr6	5178171	5178835
chr6	5225991	5226542
chr6	30075532	30075994
chr5	505488	506454
chr5	508615	509361
chr24	5676070	5676612
chr25	7097760	7098231
chr24	30666054	30666674
chr24	30660389	30660979
chr22	5106280	5106961
chr16	715391	716005
chr12	49482497	49483032
chr19	43157214	43157774
chr19	43134151	43134690
chr1	3333426	3334125
chr22	38487452	38489171
chr22	38550455	38551239
chr12	44986276	44986736
chr12	44951414	44951917
chr20	6575244	6575754
chr8	29424422	29425020
chr22	15190039	15190634
chr22	15280188	15280678
Zv9_NA849	6233	6657
chr11	44368458	44369188
chr25	8270906	8271503
Zv9_NA918	37249	37684
chr6	56889375	56889865
chr6	56985792	56986372
chr9	48829873	48830421
chr9	48836117	48836601
chr5	66836428	66836988
chr5	66842404	66842954
chr24	26547297	26548135
chr24	26581192	26582699
Zv9_NA41	56661	57341
Zv9_NA41	68889	69501
chr4	59989789	59990350
chr17	52653407	52653921
chr25	4557490	4558043
chr9	30792294	30793265
chr16	3027285	3027814
chr18	39538889	39539977
chr18	39540577	39541429
chr18	39559434	39560067
chr13	49472029	49473309
chr13	49489457	49489963
chr13	49502332	49502871
chr22	5165426	5166375
chr2	2774979	2775492
chr22	20649718	20650134
chr22	20673476	20674114
chr19	48135072	48135696
chr19	48123408	48124224
chr19	48121069	48121695
chr19	48151754	48152494
chr6	45402759	45403230
chr6	45287589	45288127
Zv9_NA463	289	949
chr24	36586346	36587330
chr24	36607090	36607765
chr24	36681952	36682692
chr7	75356776	75357965
chr3	13835992	13836797
chr3	13857822	13858633
chr3	13866704	13867259
chr17	53406178	53406724
chr2	13693107	13693667
chr20	48856958	48857446
chr10	25292269	25292887
chr6	17360468	17361235
chr10	1375654	1376214
chr25	34164118	34164878
chr25	34171753	34172288
chr12	9007052	9007706
chr5	103561	104150
chr18	41414839	41415384
chr18	41446173	41447480
chr18	41484381	41485341
chr18	41486924	41487680
chr18	41498033	41498548
chr18	41511806	41512951
chr18	41505975	41506531
chr18	41507414	41508093
chr18	41525518	41526052
chr18	41553482	41555215
chr18	41701256	41701854
chr5	73465420	73465965
chr5	73474426	73475139
chr5	73516922	73517578
chr19	7365847	7366933
chr1	31450704	31451328
chr24	1851438	1852399
chr18	1342666	1343128
chr2	55055206	55055877
chr13	49819376	49820100
chr9	5581727	5582417
chr9	5551348	5552073
chr9	5473365	5473914
chr6	53534425	53535085
chr6	53620751	53621282
chr6	53627733	53628367
chr22	40167337	40168085
chr25	34794846	34795404
chr25	34804413	34804942
chr18	42205907	42206484
chr13	9579601	9580169
chr18	11171938	11172500
chr18	11174188	11175533
chr18	11178631	11179532
chr18	11181152	11181717
chr5	41766059	41766677
chr3	63224216	63224961
chr3	63209537	63210501
chr15	3145293	3145809
chr15	3170027	3170761
chr15	3184622	3185247
chr24	35698128	35698844
chr19	4545690	4546149
chr19	4573760	4574489
chr5	59803398	59803964
chr5	59788416	59789000
chr5	59765876	59766395
chr11	41315472	41316174
chr20	45497197	45497884
chr20	45492562	45492962
chr3	551051	551655
chr3	528380	528915
chr24	20391230	20392189
chr24	21920254	21920944
chr24	21921159	21921747
chr13	2044404	2045331
chr20	4291062	4292089
chr20	4321380	4321992
chr20	4349574	4350128
chr9	4315554	4316090
chr9	4149841	4150601
chr11	9615342	9615836
Zv9_NA732	167491	168606
chr10	4011652	4012195
chr10	3990195	3990706
chr23	2617645	2619003
chr12	8884194	8884714
Zv9_NA179	49744	50402
Zv9_NA179	28137	28687
chr7	75575200	75575757
chr22	3270374	3271207
chr17	11181466	11182078
chr3	10298808	10299345
Zv9_NA345	31248	32027
Zv9_NA345	53135	53881
Zv9_NA345	78723	79734
chr23	34788289	34789079
chr23	34820898	34821696
chr23	34864612	34865158
chr3	10856990	10857529
chr3	10867527	10868270
chr3	31394582	31396048
chr10	45701458	45701934
chr17	13131205	13131673
chr17	13393063	13393521
chr1	3994937	3995501
chr1	3991091	3991967
chr25	5561233	5561874
chr25	5578222	5578833
chr16	7488662	7489327
chr5	73918008	73918564
chr5	73864682	73865180
chr11	44882814	44883494
chr11	44872639	44873440
chr11	44853135	44853810
chr11	44840104	44840823
chr13	7364436	7365876
chr13	7298097	7298863
chr13	7295649	7296099
chr13	7286547	7287230
chr19	35417708	35418242
chr15	43249648	43250294
chr7	44654190	44654949
chr7	44657122	44657682
chr3	10949053	10949982
chr3	10942833	10943427
chr4	8201648	8202179
chr5	74593321	74593929
Zv9_NA783	14054	14826
chr24	32805446	32806047
Zv9_NA403	61232	62091
Zv9_NA403	50230	51050
Zv9_NA403	49373	50161
chr15	3684087	3684937
chr15	3714194	3714842
chr15	3741446	3742081
chr15	3728484	3729135
chr2	55308313	55308980
chr24	41346	41817
chr24	42148	43152
chr24	50305	50881
Zv9_NA387	24569	25087
chr12	9077250	9077758
chr5	12426585	12427150
chr5	12445523	12446399
chr7	77209232	77210042
chr7	77187807	77188379
chr7	77157205	77158246
chr13	2771648	2772126
chr13	2759026	2759717
chr9	50217876	50218438
chr25	2882657	2883258
chr20	45804689	45805193
chr1	48755046	48755623
chr1	48779245	48779922
chr1	4229134	4229770
chr9	5740803	5741227
chr12	8947699	8948256
chr12	8946040	8946531
chr15	5885781	5886398
chr23	21147289	21147741
chr23	21186434	21187709
chr23	21191107	21191788
chr23	21118544	21119101
chr18	46883152	46883760
chr18	46865142	46865818
chr21	3083873	3084456
chr21	3068499	3069153
chr11	13468822	13469373
chr11	13543445	13543880
chr6	35638957	35639391
chr16	47367752	47368509
Zv9_scaffold3551	240098	240694
Zv9_scaffold3551	232633	233237
chr17	36259926	36260740
chr16	46401862	46402415
chr7	73206246	73206852
chr7	73207269	73207976
chr7	73209484	73209955
chr7	73229800	73230144
chr7	73251605	73252115
chr7	73266960	73267513
chr2	16477444	16477980
chr9	8822427	8822944
chr15	46309950	46310496
Zv9_NA486	52791	53445
chr8	8219627	8220154
chr8	2164940	2165540
chr10	12383330	12383873
Zv9_NA399	32178	32739
chr6	59893215	59893828
chr7	76247764	76248171
chr21	3510463	3511060
chr12	44936016	44936558
chr10	4115355	4116108
chr13	46864606	46865226
Zv9_NA815	18212	18735
Zv9_NA173	27654	28175
chr10	43618947	43619902
Zv9_NA227	27631	28074
Zv9_NA227	89780	90334
Zv9_NA227	86527	87518
Zv9_NA545	74648	75176
Zv9_NA545	92238	93101
Zv9_NA545	109493	110101
Zv9_NA545	191602	192201
Zv9_NA649	42487	42831
Zv9_NA650	7472	8007
chr12	44917243	44917806
chr20	45551728	45552590
chr2	58094777	58095449
chr2	58099006	58099526
chr6	53520529	53521223
chr16	469004	469625
chr16	446741	447548
chr6	59168089	59168708
chr21	521407	521923
chr21	513796	514418
chr17	42784242	42784908
chr24	1974381	1974920
chr24	1993420	1994154
Zv9_NA545	23279	23735
Zv9_NA227	3736	4671
chr16	52443035	52443419
chr16	52433517	52434070
chr15	37380184	37380781
chr15	37376627	37377238
Zv9_NA503	201285	201971
Zv9_NA503	199607	200160
chr16	861907	862491
chr2	59772740	59773145
chr4	6423956	6424449
chr12	46857647	46858386
chr12	46860371	46861130
chr2	83360	83903
chr8	636254	637144
chr23	38395940	38396503
chr23	38392052	38392738
chr2	41881599	41882475
chr2	41867148	41868202
chr2	41854393	41854900
chr15	3113923	3114588
chr18	46392810	46393360
chr18	46387601	46388311
chr24	37563269	37564214
chr5	62763631	62764181
chr21	3439075	3439623
chr21	3453519	3454233
chr20	4431297	4431875
chr2	59520981	59521624
chr9	56241724	56242327
chr16	55123794	55124208
Zv9_NA518	4806	5283
chr18	23428819	23430008
chr18	23397712	23398761
chr18	23394621	23394979
chr2	51532420	51533012
chr13	2309586	2310265
chr13	2300742	2301451
chr13	2277598	2278445
chr18	9477656	9478158
chr18	9380542	9381201
chr18	9439473	9440040
chr10	3795335	3796015
chr10	3763512	3764424
chr10	3758562	3759126
chr10	3698292	3699072
chr10	3693625	3694174
chr10	3593370	3594394
chr1	41118537	41119136
chr5	64404	64904
chr14	515045	515525
chr23	44473318	44473881
chr19	2278182	2278736
chr19	2289284	2290839
chr19	2128531	2129159
chr19	2131593	2132092
chr14	47592318	47593054
chr14	48012326	48012790
chr14	48004170	48004890
chr22	26566317	26566865
Zv9_NA422	21198	21702
chr20	45594403	45595075
chr20	45609215	45609816
chr16	943424	944001
Zv9_NA372	90169	91151
Zv9_NA372	41730	42463
Zv9_NA372	5322	6156
Zv9_NA372	2261	2792
chr22	22401554	22402022
Zv9_NA310	5709	6253
chr17	11186578	11188088
chr20	4629551	4630082
chr20	4492347	4493236
chr20	4485312	4487075
chr20	4477679	4478216
Zv9_NA689	8336	9099
chr16	32398310	32399153
chr5	37814224	37815441
Zv9_NA73	23320	24802
chr8	6550694	6551534
chr8	6432274	6432739
Zv9_scaffold3551	44892	45621
chr23	41706125	41706988
chr3	48830739	48831469
chr3	48816491	48817032
chr9	52348113	52348684
chr14	37777731	37778402
chr11	3500161	3500996
chr24	19307448	19307851
chr8	52902273	52902947
chr8	52908906	52909617
chr8	52921138	52922481
chr11	44007827	44008571
chr11	43961983	43962542
Zv9_scaffold3512	6646	7210
Zv9_scaffold3512	60375	60912
Zv9_scaffold3512	68112	68600
Zv9_scaffold3512	76379	76883
chr16	57760634	57761168
chr20	51755227	51755936
chr20	51683338	51683988
Zv9_scaffold3504	660	1111
chr15	11323276	11323796
chr25	36621417	36621861
chr25	36479287	36479789
chr25	36475892	36476368
chr3	4324623	4325209
chr3	5706341	5707068
chr2	54368588	54369091
chr8	3507094	3507495
chr9	52208816	52209326
chr16	14377376	14377878
chr16	9305776	9306686
chr22	41433517	41434066
chr1	30719739	30720291
chr10	1356740	1357422
chr16	3192487	3193057
chr16	51128908	51129361
chr16	51123670	51124258
chr2	888426	888932
chr2	921358	922232
chr13	1898675	1899217
chr13	49076280	49077044
chr13	49048486	49049290
Zv9_scaffold3495	160259	160943
Zv9_scaffold3495	311787	312381
chr22	41615992	41616500
chr17	13211733	13212356
chr17	13276065	13276614
chr17	42181319	42182277
chr17	42143403	42144373
chr17	42113710	42114303
chr17	42088281	42088992
chr17	42073067	42074321
chr17	42022667	42023547
chr17	42015659	42017374
chr17	41999066	42001468
chr17	41987151	41987942
chr17	41976413	41976969
chr17	41717378	41717995
chr17	41680405	41681593
chr17	41663114	41663995
chr17	41649882	41650510
chr17	41646454	41647155
chr17	41629080	41629990
chr17	41622700	41623450
chr17	41620694	41621313
chr17	41597358	41598228
Zv9_scaffold3492	226231	226933
Zv9_scaffold3492	213118	214053
Zv9_scaffold3492	156586	157148
Zv9_scaffold3492	120298	120850
Zv9_scaffold3492	102741	103308
Zv9_scaffold3492	47299	47849
Zv9_scaffold3492	26370	26719
Zv9_scaffold3492	14912	15516
chr20	44397403	44397940
chr20	44419305	44420052
Zv9_scaffold3471	176969	177503
Zv9_scaffold3471	425974	426706
Zv9_scaffold3471	435750	436388
Zv9_scaffold3471	470190	470752
chr11	24873195	24874461
chr11	24735860	24736739
chr11	24724053	24724682
chr11	24714486	24715384
chr11	24699391	24700064
chr11	24686965	24687319
chr11	24664252	24665413
chr11	24653606	24654069
chr11	24643670	24644610
Zv9_scaffold3551	57449	58168
Zv9_scaffold3551	9013	9573
Zv9_scaffold3551	168678	169258
Zv9_scaffold3551	161329	161783
Zv9_scaffold3551	147840	149555
Zv9_scaffold3551	141811	142503
Zv9_scaffold3486	94966	95521
Zv9_scaffold3486	22205	22581
chr9	52515160	52515714
chr13	45072698	45073281
chr2	25073406	25074016
chr2	25104352	25105242
chr2	25251460	25252095
chr2	25318119	25319280
chr2	25345814	25346299
chr9	28047187	28047851
chr9	28029566	28030232
chr1	6276074	6276665
Zv9_NA892	59545	60105
Zv9_NA892	66738	67253
Zv9_scaffold3548	145677	146380
chr14	46373551	46374119
chr1	3845418	3846104
chr20	5601020	5601610
chr11	1988846	1989455
chr11	1928842	1929414
chr11	1914354	1915128
Zv9_scaffold3529	205357	206694
Zv9_scaffold3529	182276	182689
Zv9_scaffold3529	157324	157986
Zv9_scaffold3529	29207	29763
chr22	36123912	36124326
chr17	2714718	2715251
Zv9_scaffold3563	224735	225277
chr7	13562269	13562810
Zv9_scaffold3540	255449	256340
Zv9_scaffold3540	238993	239530
Zv9_scaffold3540	235973	236454
Zv9_scaffold3540	107489	107957
chr6	44845640	44846467
chr6	44812514	44813042
chr6	44796751	44797371
chr6	44784172	44784947
chr6	44778218	44779221
chr16	32656324	32656903
chr16	32562327	32562857
chr16	32521499	32522043
chr16	32509698	32510201
chr16	32506657	32507371
chr16	32451812	32452350
chr16	32444528	32445673
chr11	8449472	8450800
chr7	11144840	11145478
chr20	49933021	49933564
chr20	49907103	49907583
chr20	49880314	49880899
Zv9_scaffold3500	243215	243879
chr20	49797638	49798154
Zv9_scaffold3534	103339	105337
Zv9_scaffold3534	88159	88551
Zv9_scaffold3534	63025	63812
chr9	52921468	52921984
chr9	53019988	53020525
chr9	53074664	53075626
chr9	53109269	53109876
chr9	53201953	53202974
chr9	53227455	53227920
chr9	5251873	5252780
chr9	5271823	5272482
chr16	46691727	46692271
chr16	46714499	46715074
chr16	46818966	46819513
chr16	46828112	46828736
chr5	9939688	9940174
chr5	10040778	10041248
chr5	10106769	10107289
chr5	20940788	20941332
chr12	22587108	22587683
chr12	22536784	22537291
chr12	22254690	22255278
chr21	30614710	30615369
chr17	36540458	36541167
chr17	36519656	36520560
chr17	36477120	36477781
chr17	36411999	36412526
chr17	36363242	36363772
chr17	36360760	36361621
chr17	36340013	36340665
chr17	36321398	36321920
chr23	5381042	5381919
chr23	5365886	5366563
chr23	5529246	5530106
chr23	5561633	5562393
chr23	5582638	5583272
chr23	5589350	5590395
chr8	29445224	29446166
chr9	4879519	4880301
chr9	4904562	4905397
chr9	4920092	4920672
chr14	29218290	29218650
chr14	29213017	29213578
chr14	29209052	29209615
chr9	4937365	4937975
chr9	4965696	4966238
chr9	5033104	5033488
chr9	56655012	56655507
chr9	56596626	56597235
chr1	195354	196003
chr1	267096	267655
chr1	272542	273468
chr1	296794	297357
Zv9_NA908	89993	90504
Zv9_NA908	14894	15180
chr1	784856	785238
chr1	929057	929577
chr12	2417508	2418192
chr12	50017272	50017810
Zv9_NA503	9988	10516
chr1	1888746	1889275
chr1	1890809	1891308
chr1	1895558	1896084
chr1	2066149	2067690
chr1	2069292	2070168
chr1	2140906	2141610
chr1	2150907	2151448
chr1	2156738	2157274
chr2	3005650	3006156
chr1	2428031	2428565
chr1	2812568	2813131
chr15	3148781	3149551
chr15	3153988	3154532
chr1	3511445	3512208
chr1	3302912	3303553
chr1	3297470	3298033
chr1	4121225	4121738
chr1	4218090	4219475
chr1	4214465	4214916
chr1	4208145	4210914
chr1	4165791	4166892
chr1	4357105	4357936
chr1	4396370	4396973
chr1	4544117	4544673
chr1	5190131	5190632
chr1	4682980	4684274
chr1	4690615	4691044
chr1	5265111	5265733
chr1	5286343	5287215
chr1	5317138	5317617
chr1	5320191	5320942
chr1	5329020	5329682
chr1	5369508	5370436
chr1	5410312	5410955
chr1	5416763	5417564
chr1	5423355	5423819
chr1	5468455	5469180
chr1	5490718	5491448
chr1	5501120	5501740
chr1	5655731	5656244
chr1	5718829	5719323
chr1	6715772	6716330
chr3	12843769	12844600
chr3	12846755	12847155
chr1	7718911	7719402
chr1	7843227	7843789
chr1	7964640	7965259
chr1	8408987	8409449
chr1	4988460	4988937
chr1	5102130	5102654
chr1	9889633	9890174
chr1	9956764	9957541
chr1	10415938	10416458
chr1	10628872	10629415
chr1	10634992	10635635
chr1	11008929	11010261
chr1	11017434	11017952
chr1	11263921	11264506
chr1	4610665	4611295
chr1	4605380	4606247
chr1	4596863	4597328
chr1	4590560	4591133
chr1	11699430	11700302
chr1	11981094	11981654
chr1	12099995	12100631
chr1	12241550	12242749
chr1	12247304	12248419
chr1	12249624	12250152
chr1	12265290	12265917
chr1	12267591	12268168
chr1	12279836	12280391
chr1	12331454	12332148
chr1	12342360	12342822
chr1	12361803	12362364
chr1	12393655	12394704
chr1	12602636	12603204
chr1	12738346	12738919
chr1	12936550	12936998
chr1	13081328	13081867
chr1	13703702	13704187
chr1	13714742	13715295
chr1	14026677	14027284
chr1	14408160	14408673
chr1	14427386	14428096
chr1	14532453	14533174
chr1	14543772	14544349
chr1	14550875	14551389
chr1	14571600	14572076
chr1	14767440	14768114
chr1	15150516	15151022
chr1	15161209	15162263
chr1	15280149	15280689
chr1	15228376	15229002
chr1	15466013	15466525
chr1	15469958	15470545
chr1	15490233	15490752
chr1	15718092	15718797
chr1	15724028	15724660
chr1	15757530	15758121
chr1	15864970	15865635
chr1	16061279	16061762
chr1	16122000	16122548
chr1	16142780	16143580
chr1	16156824	16157821
chr1	16164242	16164868
chr1	16166400	16167504
chr1	16169656	16170204
chr1	16200604	16201527
chr1	16332070	16332616
chr1	16371943	16372621
chr1	16376646	16377788
chr1	16512363	16512894
chr1	16528712	16529409
chr1	16536002	16536684
chr1	17060780	17061495
chr1	17349824	17350764
chr1	17428561	17429146
chr1	17436978	17437564
chr1	17577164	17578369
chr1	17596775	17597469
chr1	17612664	17614440
chr1	17621399	17621985
chr1	17626937	17627490
chr1	17641009	17643214
chr1	17648644	17649179
chr1	17657502	17658036
chr1	17744755	17745245
chr1	17791124	17791687
chr1	17908680	17909200
chr1	17994576	17995111
chr1	18398636	18399651
chr1	18453676	18454339
chr1	18484456	18485066
chr1	18675849	18677884
chr1	18693100	18694776
chr1	18706111	18706568
chr1	19081697	19082250
chr1	19088483	19089217
chr1	19100248	19100848
chr1	19331726	19332282
chr1	19595062	19595501
chr1	19619079	19619676
chr1	19947832	19948925
chr1	19962458	19962962
chr1	20419822	20420448
chr1	20576664	20577493
chr1	20617205	20618754
chr1	20635207	20635737
chr1	21315056	21315876
chr1	21391604	21392329
chr1	29719184	29719896
chr1	29630615	29631889
chr1	29448937	29449512
chr1	28981327	28982300
chr1	28839070	28839725
chr1	28836799	28837324
chr1	28792397	28793413
chr1	28759852	28760439
chr1	28613250	28613711
chr1	28543549	28544075
chr1	28402072	28402588
chr1	28158015	28158452
chr1	22764178	22764752
chr1	22803012	22804038
chr1	22827244	22828116
chr1	22833009	22833727
chr1	22833794	22834401
chr1	22843519	22844074
chr1	22846176	22846637
chr1	22846847	22847404
chr1	22876703	22878023
chr1	22934347	22935040
chr1	22936900	22937471
chr1	22942815	22943351
chr1	22955760	22956596
chr1	22960271	22960844
chr1	22994877	22995704
chr1	23010232	23010778
chr1	23038058	23038632
chr1	23358088	23358426
chr1	23656913	23657303
chr1	23709815	23710294
chr1	23748098	23748910
chr1	23787795	23789145
chr1	23803228	23804023
chr1	23944721	23945301
chr1	24014536	24015576
chr1	24121315	24121803
chr1	24131500	24132085
chr1	24379011	24379612
chr1	24529817	24530245
chr1	24542149	24542807
chr1	21513062	21513563
chr1	21604790	21605411
chr1	21694421	21694923
chr1	21719294	21720193
chr1	21725128	21725872
chr1	21740611	21741278
chr1	21817273	21818432
chr1	21830767	21831334
chr1	21863870	21864481
chr1	21864494	21865324
chr1	21887930	21889058
chr1	21892383	21893396
chr1	21906181	21906525
chr1	21911241	21911804
chr1	21955535	21955905
chr1	21956060	21956688
chr1	21962406	21962897
chr1	22094952	22095603
chr1	22466322	22466903
chr1	22534846	22535321
chr1	22568996	22570372
chr1	22570633	22571780
chr1	22590737	22591752
chr1	22596371	22597899
chr1	22605277	22606022
chr1	22613190	22613993
chr1	22618692	22619705
chr1	22628313	22628845
chr1	27414011	27414560
chr1	24845945	24846428
chr1	25084103	25084653
chr1	25156775	25157559
chr1	25190538	25191131
chr1	25220870	25221512
chr1	25230329	25231361
chr1	25314733	25315212
chr1	25795403	25796007
chr1	25797773	25798364
chr1	26015701	26016758
chr1	26058871	26059878
chr1	26064250	26064779
chr1	26095540	26096158
chr1	26110392	26111034
chr1	26111288	26111942
chr1	26117087	26117677
chr1	26121403	26122199
chr1	26136659	26137449
chr1	26140171	26141394
chr1	26141425	26142204
chr1	26173673	26174440
chr1	22709971	22710514
chr1	30327604	30328164
chr1	30246561	30247424
chr1	30153191	30153757
chr1	30072338	30073425
chr1	30063563	30064344
chr1	30042320	30043001
chr1	30995460	30996003
chr1	32138767	32139326
chr1	31411199	31412380
chr1	32663819	32664362
chr1	33022251	33022917
chr1	33023447	33023993
chr1	33030555	33031175
chr1	33392431	33392802
chr1	33452856	33453628
chr1	33804392	33804820
chr1	34098286	34099556
chr1	34138947	34139987
chr1	34204013	34204400
chr1	34304994	34305574
chr13	4324094	4324634
chr22	15248544	15249074
chr1	37219474	37219943
chr1	37192475	37193112
chr1	37082082	37082926
chr1	36762665	36763335
chr1	36722467	36723208
chr1	36611371	36611960
chr1	36578194	36578864
chr1	36283734	36284327
chr1	36209190	36210326
chr1	36141874	36142533
chr1	36137976	36138539
chr1	36132589	36133246
chr1	36096559	36097135
chr1	36076597	36077718
chr1	36063862	36064502
chr1	36049581	36050399
chr1	35915479	35916370
chr1	35861561	35862298
chr1	35836471	35838112
chr1	35828279	35829826
chr1	35826505	35827467
chr1	35823800	35824720
chr1	35801011	35802357
chr1	35786390	35786907
chr1	35783809	35785118
chr1	35764265	35765135
chr1	35710436	35710934
chr1	35699460	35700159
chr1	35507193	35508090
chr1	35460087	35461014
chr1	35410614	35411705
chr1	35405643	35407536
chr1	35396188	35396688
chr1	35354107	35354660
chr1	35340509	35341085
chr1	35338872	35340479
chr1	35328661	35329432
chr1	35226006	35227320
chr1	35225391	35225976
chr1	35222482	35223355
chr1	35215967	35216698
chr1	35210766	35212068
chr1	38972308	38972857
chr1	39053204	39053862
chr1	38884493	38885089
chr1	38678184	38678788
chr1	38674286	38674775
chr1	38634030	38634552
chr1	38633524	38633977
chr1	38606996	38607309
chr1	38502964	38503840
chr1	38483079	38483820
chr1	38456719	38457658
chr1	38439390	38440009
chr1	38293166	38293900
chr1	40866226	40866761
chr1	40846607	40848494
chr1	40842475	40844252
chr1	40829915	40830878
chr1	40827322	40827812
chr1	40823075	40824935
chr1	40815525	40817087
chr1	40812589	40813201
chr1	40808095	40809742
chr1	40788315	40788952
chr1	40787409	40788244
chr1	40776978	40777887
chr1	40760703	40763194
chr1	40749918	40750548
chr1	40746967	40747701
chr1	40745844	40746576
chr1	40516096	40516689
chr1	40474381	40475248
chr1	40466003	40469545
chr1	40455641	40456198
chr1	40276774	40277581
chr1	40268076	40268502
chr1	40126212	40126929
chr1	40100103	40100751
chr1	40099442	40099990
chr1	40081804	40082611
chr1	39855173	39855844
chr1	39850857	39851635
chr1	39820370	39820883
chr1	39777823	39778393
chr1	39709308	39709767
chr1	39704386	39706210
chr1	39693080	39693988
chr1	39668425	39668905
chr1	39655673	39656364
chr1	39620028	39620685
chr1	39595307	39595905
chr1	39589198	39589749
chr1	39586997	39588190
chr1	39586519	39586990
chr1	39569074	39569899
chr1	39553279	39554230
chr1	39548148	39548698
chr1	39532907	39533905
chr1	39525070	39525888
chr1	39517083	39517654
chr1	39208263	39208836
chr1	41178381	41178917
chr1	41267323	41268163
chr1	41276039	41276548
chr1	41287928	41288497
chr1	41314438	41315010
chr1	41349612	41350267
chr1	41409798	41410271
chr1	41500759	41501734
chr1	41596884	41597734
chr1	41889784	41890329
chr1	41897441	41899213
chr1	44683128	44683973
chr1	44988010	44988506
chr1	45142348	45143042
chr1	45849128	45849704
chr1	45957070	45957909
chr1	46049971	46051163
chr1	46062622	46063177
chr1	46186087	46187537
chr1	46232019	46233589
chr1	46242838	46243581
chr1	46245318	46246380
chr1	46254237	46255195
chr1	45466144	45466632
chr1	42026179	42026618
chr1	42080936	42081490
chr1	42142760	42143397
chr1	42158219	42158816
chr1	42177860	42179496
chr1	42241882	42242457
chr1	42247650	42248285
chr1	42296641	42297157
chr1	42489954	42490498
chr1	42550122	42550636
chr1	42561048	42561620
chr1	42610834	42611393
chr1	42631624	42632234
chr1	42744399	42744954
chr1	42870012	42870857
chr1	42908960	42909697
chr1	43071609	43072289
chr1	43094498	43095117
chr1	43129879	43130461
chr1	43203538	43204092
chr1	43293345	43293865
chr1	43443275	43443693
chr1	43474334	43474863
chr1	43585331	43585787
chr1	43607962	43608508
chr1	43917581	43918360
chr1	46546879	46547908
chr1	46580146	46580994
chr1	46609143	46609931
chr1	46669217	46670089
chr1	46686753	46687253
chr1	46704746	46705431
chr1	46723036	46723746
chr1	46731342	46731924
chr1	46744750	46745653
chr1	46873127	46873985
chr1	47047461	47048774
chr1	47053263	47054544
chr1	47261600	47262403
chr1	47399992	47400497
chr1	47492071	47492764
chr1	47525544	47526313
chr1	47572659	47573261
chr1	47722735	47723951
chr1	47741376	47742138
chr1	47743312	47745018
chr1	47761207	47762323
chr1	47771548	47772467
chr1	47773646	47774080
chr1	47778697	47779607
chr1	47781419	47781945
chr1	47794338	47794819
chr1	47795611	47796281
chr1	47796923	47798419
chr1	47847350	47848412
chr1	47873381	47873981
chr1	47904844	47905633
chr1	48054902	48055530
chr1	48111369	48111930
chr1	48229514	48230011
chr1	48459278	48460127
chr1	48502529	48503134
chr1	50228187	50228930
chr1	50215763	50216348
chr1	50190964	50191652
chr1	49890749	49891324
chr1	49849039	49849921
chr1	49821149	49821875
chr1	49352647	49353358
chr1	49345724	49346353
chr17	10733734	10734389
chr17	10765086	10765667
chr17	10776238	10776847
chr17	10783285	10784384
chr1	49068670	49069282
chr1	50247697	50248249
chr1	50269780	50270322
chr1	50292814	50293366
chr1	50296372	50297205
chr1	50339209	50340307
chr1	50352276	50353527
chr1	50367455	50368041
chr1	50372741	50373418
chr1	50375667	50377208
chr1	50402383	50404311
chr1	50406257	50407184
chr1	50409085	50409797
chr1	50463067	50463558
chr1	50475570	50476136
chr1	50500983	50501705
chr1	50519567	50520215
chr1	50576582	50577132
chr1	50637453	50637977
chr1	50638444	50639052
chr1	50654890	50655402
chr1	50717203	50717756
chr1	50842920	50843478
chr1	50849835	50850591
chr1	50953999	50954587
chr1	51158801	51159279
chr1	51240075	51240631
chr1	51371471	51372132
chr1	51605773	51606454
chr1	51692736	51693522
chr1	51646395	51647001
chr1	52022117	52022716
chr1	51844236	51844767
chr1	52322503	52322985
chr1	52341966	52342405
chr1	52401246	52401746
chr1	52816207	52816951
chr1	52564397	52564989
chr1	53336981	53337428
chr1	53685989	53686545
chr1	53691466	53691948
chr1	54478624	54479128
chr1	54566515	54567479
chr1	54664383	54664940
chr1	54911619	54912189
chr1	54820849	54821570
chr1	54775725	54776288
chr1	55730509	55731016
chr1	55687480	55688123
chr1	55657790	55658768
chr1	55529571	55530802
chr1	55528844	55529494
chr1	55796964	55797364
chr1	56764734	56765349
chr1	52980378	52981071
chr1	57662810	57663675
chr1	59538582	59539083
chr1	59484002	59484633
chr1	59949151	59949699
chr2	11758	12237
chr1	60238309	60238922
chr1	60156462	60157107
chr1	60152341	60152964
chr1	60099459	60099951
chr10	202729	203545
chr10	187825	188455
chr10	168072	168971
chr10	140473	141092
chr10	234998	235668
chr10	285031	285921
chr10	322757	323455
chr10	337795	338673
chr10	370928	371495
chr10	374955	375646
chr10	413940	414454
chr10	479604	480164
chr10	553694	554179
chr10	586159	586771
chr10	952414	952992
chr10	738344	740302
chr10	767129	767731
chr10	871938	872405
chr10	878828	879479
chr10	942035	942656
chr10	930227	931082
chr10	908959	909550
chr10	2589963	2590662
chr10	2543547	2544031
chr10	1154525	1155226
chr10	1162600	1163113
chr10	1206482	1207310
chr10	1207391	1208221
chr10	1254373	1255018
chr10	1255626	1256368
chr10	1264262	1264823
chr10	1265165	1265691
chr10	2335822	2336309
chr10	1900402	1901063
chr10	1875251	1875777
chr16	58139609	58140079
chr16	58319722	58320246
chr10	1059323	1060069
chr10	967318	967869
chr10	973253	973897
chr10	1099620	1100125
chr10	1110324	1110866
chr10	1534389	1535329
chr10	1582356	1582891
chr10	1822418	1823029
chr10	2942481	2942920
chr10	2986990	2987758
chr10	4132024	4133221
chr10	4157944	4158714
chr10	4160655	4162254
chr10	4189251	4190306
chr10	4195198	4195905
chr10	4208498	4211114
chr10	4234814	4235593
chr10	4270495	4271143
chr10	4907612	4908213
chr10	5189647	5190161
chr10	5356101	5356576
chr10	5465068	5465615
chr10	5495750	5496573
chr10	8289006	8289567
chr10	7839677	7840063
chr10	7829618	7830097
chr10	7380595	7381868
chr10	8799495	8800204
chr10	8808215	8808787
chr10	8936882	8937435
chr10	8979776	8980562
chr10	9091379	9091934
chr10	9174410	9174947
chr10	9445058	9445604
chr10	9456474	9457137
chr10	9469957	9470580
chr10	9474524	9475077
chr10	9494276	9494912
chr10	9518393	9518939
chr10	9536257	9537129
chr10	9651700	9652152
chr10	9700565	9701164
chr10	8697867	8698316
chr10	8688356	8688817
chr10	14772031	14772644
chr10	14989940	14990452
chr10	15037944	15038638
chr10	15042585	15043348
chr10	15450021	15450582
chr10	16141127	16141683
chr10	13048884	13049502
chr10	13162967	13163522
chr10	13332696	13333256
chr10	13415438	13415987
chr10	13443668	13444162
chr10	13467943	13468533
chr10	13474167	13474975
chr10	13489992	13490497
chr10	13514589	13515172
chr10	13515239	13516192
chr10	13517913	13520776
chr10	13520898	13521455
chr10	13555573	13556122
chr10	13564087	13564621
chr10	13595084	13595719
chr10	13658226	13658647
chr10	13694175	13694731
chr10	13696305	13696974
chr10	13730424	13731911
chr10	13942055	13942545
chr10	13963911	13964469
chr10	14213271	14213803
chr10	14427229	14427709
chr10	11650780	11652117
chr10	11513921	11514554
chr10	11447703	11448270
chr10	11138099	11138758
chr10	11083317	11083752
chr10	10888528	10889206
chr10	10879779	10880629
chr10	10874083	10876147
chr10	10862568	10863894
chr10	10860792	10861395
chr10	10851747	10852613
chr10	10798599	10799163
chr10	10788719	10789382
chr10	10607384	10608774
chr10	10285077	10285719
chr10	10230704	10231264
chr10	10204264	10206246
chr10	10184251	10184766
chr10	9909301	9909705
chr10	9907061	9907543
chr10	9871807	9872679
Zv9_NA654	66769	67774
chr10	19506817	19507565
chr10	19090340	19090764
chr10	19080235	19080791
chr10	19064162	19064838
chr10	18994152	18994983
chr10	18879457	18880130
chr10	18481240	18482382
chr10	17887878	17888412
chr10	17823983	17824630
chr10	17761253	17761798
chr10	17683092	17683983
chr10	17597810	17598573
chr10	17462505	17463059
chr10	17445955	17446600
chr10	17429167	17429864
chr10	22825006	22825623
chr10	22516157	22516861
chr10	22376796	22377431
chr10	22372392	22372899
chr10	22345554	22346265
chr10	22259497	22259847
chr10	22182387	22182936
chr10	21719585	21720127
chr10	21368738	21369360
chr10	21350192	21350975
chr10	21283041	21283626
chr10	21269385	21270069
chr10	21259778	21260338
chr10	21256399	21256931
chr10	21242387	21243030
chr10	21187336	21188004
chr10	21118437	21119279
chr10	21101343	21102038
chr10	21088364	21088915
chr10	21069621	21070585
chr10	21054819	21055313
chr10	21026909	21027521
chr10	20999100	21000304
chr10	20998549	20999098
chr10	20823981	20824543
chr10	20818562	20819186
chr10	20480069	20480605
chr10	20460173	20460706
chr10	20449948	20450484
chr10	20386325	20386886
chr10	20260763	20261414
chr10	20252082	20252582
chr10	20229944	20230912
chr10	20221997	20224932
chr10	20216633	20217638
chr10	20048979	20049632
chr10	19960970	19961483
chr25	2465186	2465863
chr25	2459847	2461104
chr10	26221658	26222220
chr10	26227854	26228614
chr10	26266138	26266728
chr10	26283397	26283956
chr10	26286872	26288234
chr10	26317222	26317852
chr10	26320410	26321745
chr10	26325890	26326432
chr10	26512650	26513088
chr10	26840461	26840966
chr10	26905525	26906083
chr10	26921983	26922663
chr10	26934107	26934608
chr10	27044080	27044579
chr10	27056584	27057881
chr10	27194487	27194999
chr10	27318651	27319162
chr10	27679019	27679441
chr10	27696160	27696935
chr10	27710439	27711299
chr10	27713948	27714447
chr10	27716511	27717080
chr10	27738046	27739043
chr10	27741573	27742026
chr10	27754008	27754855
chr10	27761944	27764064
chr10	27785738	27786249
chr10	27800629	27801248
chr10	27806779	27807373
chr10	27819531	27820134
chr10	27826323	27827012
chr10	27829381	27829921
chr10	27845050	27847191
chr10	27847335	27848572
chr10	27850037	27851713
chr10	27862043	27863095
chr10	27872203	27872863
chr10	27892851	27893653
chr10	27896019	27896833
chr10	27910016	27911266
chr10	27925383	27926641
chr10	27928057	27929841
chr10	27931674	27932899
chr10	27938091	27938746
chr10	27951408	27951847
chr10	27974786	27975353
chr10	27986532	27987158
chr10	27998512	28000197
chr10	28003891	28004981
chr10	28047418	28048342
chr10	28049817	28051492
chr10	28060658	28061671
chr10	28071278	28072465
chr10	28088259	28088817
chr10	28117495	28118139
chr10	28149816	28151083
chr10	28154961	28156396
chr10	28157687	28158492
chr10	28168607	28170255
chr10	28219768	28220776
chr10	28260530	28261137
chr10	28290189	28290794
chr10	28305508	28306051
chr10	28321201	28321870
chr10	28355661	28356392
chr10	23241438	23242333
chr10	23252431	23253000
chr10	23253656	23254297
chr10	23465831	23466443
chr10	23501422	23501972
chr10	23562431	23562948
chr10	23834023	23834565
chr10	23977524	23978018
chr10	23999063	23999772
chr10	24018310	24018790
chr10	24270582	24271141
chr10	24344081	24344547
chr10	24349854	24350354
chr10	24519586	24520055
chr10	24671948	24672451
chr10	24947545	24948109
chr10	24954117	24954624
chr10	24995989	24996654
chr10	25040039	25040628
chr10	25103681	25104376
chr10	25179285	25179820
chr10	28476862	28477396
chr10	28507003	28507707
chr10	28546076	28546947
chr10	28549578	28550155
chr10	28560443	28561471
chr10	28580028	28580682
chr10	28583623	28584569
chr10	28656658	28657571
chr10	28733558	28734258
chr10	28749797	28751655
chr10	28765758	28767340
chr10	28778352	28779346
chr10	28785446	28787174
chr10	28894506	28895552
chr10	29006047	29006524
chr10	29009621	29010050
chr10	29216942	29217561
chr10	29231164	29231835
chr10	29274055	29275130
chr10	29276163	29276580
chr10	29284798	29285385
chr10	29355987	29356545
chr10	29367428	29368136
chr10	29437154	29437865
chr10	29439971	29440920
chr10	29447840	29448920
chr10	29455718	29456615
chr10	29485078	29486486
chr10	29492922	29494235
chr10	29592836	29593270
chr10	29897774	29898320
chr10	29903388	29904320
chr10	29990678	29991249
chr10	30204038	30204549
chr10	28435413	28436186
chr10	28437023	28437670
chr10	31059331	31060116
chr10	31272998	31273853
chr10	31398919	31399543
chr10	31457978	31458391
chr10	31556326	31556850
chr10	31633818	31634237
chr10	31708113	31708710
chr10	31938349	31939021
chr10	31974512	31975188
chr10	32019626	32020138
chr10	32035704	32036187
chr10	32063938	32064721
chr10	32210255	32211090
chr10	32229278	32229818
chr10	32251119	32251706
chr10	32319571	32320124
chr10	32346046	32347539
chr10	32364110	32364547
chr10	32374222	32375237
chr10	32403037	32403597
chr10	32411875	32412423
chr10	32414643	32416077
chr10	32422719	32423639
chr10	32441813	32446175
chr10	32465821	32466285
chr10	32482462	32482858
chr10	32491262	32491764
chr10	32493956	32495043
chr10	32515571	32516204
chr10	32522241	32523078
chr10	32574009	32574739
chr10	32722979	32723586
chr10	32826605	32827229
chr10	32929033	32929603
chr10	32944031	32944815
chr10	32955728	32956425
chr10	32979981	32980754
chr10	33026080	33026753
chr10	33041639	33042541
chr10	33089913	33091394
chr10	33134930	33135518
chr10	33242992	33243510
chr10	33329831	33330475
chr10	33339902	33340568
chr10	33345797	33346196
chr10	33363769	33364252
chr10	33409663	33410110
chr10	33671271	33672029
chr10	33749597	33750104
chr10	33902424	33903139
chr10	33917970	33918912
chr10	34023130	34023676
chr10	34020424	34021309
chr10	34016518	34017451
chr10	34006862	34007981
chr10	33991173	33991776
chr10	33976925	33977496
chr10	33957867	33958443
chr10	33955970	33957492
chr10	33953867	33954641
chr10	34707894	34708526
chr10	34712415	34713060
chr10	34904669	34905658
chr10	35277730	35278245
chr10	35293108	35293618
chr10	35315049	35316585
chr10	35321825	35322360
chr10	35494542	35495231
chr10	35515301	35515873
chr10	35533156	35533855
chr10	35560499	35560968
chr10	35565861	35566378
chr10	35924394	35924957
chr10	36125918	36126503
chr10	36214211	36214870
chr10	36253944	36254508
chr10	36333632	36334089
chr10	36390950	36391651
chr10	36393191	36394149
chr10	36412604	36413161
chr10	36494968	36495590
chr10	36497944	36498501
chr10	36515853	36516483
chr10	36984246	36984770
chr10	37544085	37544631
chr10	37580364	37581569
chr10	37592192	37592756
chr10	37611605	37612329
chr10	37699273	37699783
chr10	37848027	37848601
chr10	38443738	38444511
chr10	38467188	38468051
chr10	38474486	38475446
chr10	38880500	38881169
chr10	38883481	38884098
chr10	39019262	39019848
chr10	39043357	39044370
chr10	39084583	39085179
chr10	39486263	39486784
chr10	39488877	39489333
chr10	39493181	39494185
chr10	39554941	39555504
chr10	39615459	39616360
chr10	39665895	39666825
chr10	39624456	39624894
chr10	39689845	39690374
chr10	39691133	39691598
chr10	39745772	39746413
chr17	9183111	9183851
chr10	40409842	40410629
chr10	40407832	40408459
chr10	40246355	40247052
chr10	40195577	40196369
chr10	40193291	40193922
chr10	40163357	40163934
chr10	41214073	41214858
chr10	41114159	41114784
chr10	41063010	41063672
chr10	41060212	41060942
chr10	40984078	40984665
chr10	40954288	40954827
chr10	40946984	40947924
chr10	40868040	40868849
chr10	40843852	40844447
chr10	40772484	40773068
chr10	40732269	40733170
chr10	40658345	40658879
chr10	41622938	41623386
chr10	42752862	42753431
chr10	42486839	42487398
chr10	43078357	43078901
chr10	43990022	43990747
chr10	43974858	43975575
chr10	43678491	43679134
chr5	1916676	1917163
chr10	43639422	43640521
chr10	43606988	43607840
chr10	43584742	43585609
chr10	43581541	43582609
chr10	43580076	43580763
chr10	44381847	44382570
chr10	44755971	44756524
chr10	44868176	44868813
chr10	44914422	44914813
chr10	45028070	45028622
chr10	45030918	45031513
chr10	45293604	45294447
chr10	45291038	45292171
chr10	45290261	45290984
chr10	46577576	46578063
chr11	21617732	21618357
chr10	46054878	46055353
chr10	46063549	46064799
chr10	46070610	46071568
chr10	46092541	46093601
chr10	46096162	46097071
chr10	46187058	46187628
chr10	46285886	46286304
chr10	45803594	45804439
chr10	45840363	45840980
chr10	45939873	45940403
chr11	226906	227500
chr11	580563	581212
chr11	411033	411581
chr11	373156	374127
chr11	348944	349450
chr11	10319	10877
chr11	172981	173753
chr11	169197	169737
chr11	110847	111472
chr11	115162	115723
chr20	51410922	51411364
chr20	51475938	51476382
chr11	824010	824957
chr11	792917	793746
chr16	3886964	3887562
chr16	3868600	3869081
chr11	951141	951581
chr11	956385	957037
chr11	963838	964529
chr11	1448278	1448669
chr11	2145483	2146251
chr11	2139675	2140286
chr11	3084650	3085188
chr11	3143915	3144636
chr11	3178992	3179489
chr11	1111389	1111937
chr11	2267483	2268070
chr11	2257184	2257764
chr11	2940716	2941261
chr11	2859780	2860317
chr11	2851445	2852062
chr11	2849276	2850218
chr11	2846080	2846760
chr11	2839555	2840576
chr11	2827801	2829196
chr11	2811671	2812641
chr11	3546869	3547735
chr11	3553023	3553435
chr11	3764782	3765437
chr11	3784043	3784566
chr11	3823486	3824220
chr11	3826809	3827609
chr11	3929478	3929973
chr11	3930881	3931395
chr11	4132351	4132997
chr11	4143307	4143933
chr11	4543779	4544346
chr11	4555422	4556175
chr11	4689428	4689968
chr11	4834068	4834996
chr11	4823085	4823627
chr11	5044613	5045296
chr11	5048106	5048656
chr11	5083767	5084392
chr11	5087152	5087584
chr11	5102611	5103220
chr11	5128917	5130049
chr11	5152506	5153677
chr11	5227693	5228182
chr11	5250089	5250724
chr11	5282942	5283475
chr11	5307229	5307792
chr11	5310493	5310977
chr11	5313763	5314458
chr11	5339930	5340601
chr11	5390047	5390581
chr11	5827022	5827773
chr11	6128214	6128699
chr11	6136120	6137473
chr11	6139643	6140573
chr11	6140927	6141701
chr11	6200177	6200713
chr11	6549652	6551187
chr11	6582257	6582798
chr11	6594663	6595236
chr11	6682658	6683404
chr11	6809046	6809930
chr11	6917079	6917935
chr11	8234944	8235478
chr11	8228620	8229324
chr11	7849251	7850626
chr11	7733500	7734644
chr11	7462973	7463668
chr11	7453917	7454442
chr11	7433606	7434141
chr11	8872514	8873177
chr11	8854242	8854964
chr11	8742189	8742973
chr11	8738104	8739387
chr11	8639810	8641070
chr11	8618347	8619293
chr11	8615620	8616454
chr11	8565309	8566433
chr11	8551829	8553228
chr11	8535392	8536445
chr11	10692458	10693174
chr11	10698222	10698707
chr11	10825379	10825999
chr11	10931744	10932265
chr11	10935839	10936399
chr11	10954559	10955576
chr11	10962137	10962752
chr11	10994793	10995951
chr11	11044171	11044733
chr11	9953971	9954505
chr11	10120382	10120977
chr11	10128863	10129678
chr11	10137969	10138480
chr11	10199508	10200123
chr11	9199930	9200475
chr11	13292538	13293161
chr11	13738057	13738512
chr11	13750803	13751367
chr11	13970309	13971128
chr11	14138779	14139358
chr11	14765930	14766471
chr11	14769720	14770486
chr11	14801953	14802351
chr11	14805828	14807006
chr11	17044048	17044654
chr11	16976778	16977391
chr11	18529394	18530100
chr11	18039276	18039813
chr11	17394901	17395312
chr11	16881659	16882218
chr11	16849767	16850276
chr11	16762650	16763554
chr11	16751470	16753196
chr11	16723541	16724039
chr11	16703159	16704059
chr11	16666518	16667405
chr11	16648373	16648896
chr11	15981739	15982158
chr11	15709590	15710106
chr11	18630429	18631024
chr11	18743466	18744290
chr11	18794277	18795065
chr11	18874171	18874798
chr11	18881417	18881833
chr11	18993536	18994149
chr11	19057025	19058653
chr11	19142067	19142575
chr11	19146756	19147397
chr11	19163659	19164222
chr11	19181732	19182293
chr11	19298045	19298559
chr11	19348460	19349111
chr11	19366174	19366751
chr11	19376784	19377236
chr11	19393566	19394486
chr11	19420013	19420737
chr11	19567396	19567854
chr11	19637729	19638649
chr11	19706123	19706738
chr11	19796297	19797139
chr11	19798380	19799121
chr11	19806591	19807145
chr11	19825002	19825779
chr11	19830290	19831649
chr11	19986383	19986951
chr11	20450025	20452876
Zv9_scaffold3515	271488	272011
chr11	20837082	20837658
chr11	21172176	21173448
chr11	24406921	24407515
chr11	24401962	24402492
chr11	24388745	24389973
[truncated: 13,390 more rows]

## Sheet: Table_S23
DARs_dome_vs_80%epi_Zv9
chr2	39820113	39820494
chr2	39818840	39819787
chr2	39815165	39816741
chr2	39808683	39810355
chr2	39806173	39807212
chr2	39793582	39795812
chr5	66094578	66095475
chr12	42822476	42823218
chr13	5816448	5817592
chr13	5813921	5815278
chr3	43704004	43705107
chr21	726891	727492
chr15	40735535	40736676
chr22	38759635	38760588
chr22	38762231	38762940
chr22	38769106	38770148
chr13	42797140	42799049
chr18	4889406	4890887
chr11	40684816	40685894
chr11	40676107	40676830
chr11	40667565	40668376
chr5	34130456	34131628
chr21	32469831	32470552
chr12	20796609	20797627
chr7	76394479	76394867
chr24	35554988	35556059
chr24	35588564	35589135
chr9	40928748	40929642
chr13	53029822	53030489
chr11	44910687	44912112
chr11	44484700	44486875
chr1	35085136	35087289
chr14	3753353	3753798
chr4	6518421	6519954
chr22	38632783	38633348
chr15	45379926	45383292
Zv9_NA817	63034	64017
chr5	59626827	59628045
chr21	43187998	43188816
chr21	43184157	43184969
Zv9_scaffold3548	90706	91562
chr8	10997255	10998846
Zv9_NA152	24409	26177
chr2	640207	641417
chr2	663609	665230
chr25	34304290	34304662
chr25	34318810	34319322
chr8	50572943	50574011
Zv9_scaffold3500	34671	35426
chr20	45712299	45713448
chr17	50164795	50167510
chr1	4694733	4695439
chr1	4807187	4808084
chr1	4837858	4840343
chr1	4778140	4779050
chr16	55381354	55382273
chr14	1070341	1071565
chr8	50163843	50165140
chr4	4555046	4556292
chr12	45426267	45427431
chr11	6494727	6496166
Zv9_NA722	194162	194568
chr9	6866800	6867749
chr16	3062512	3063238
chr2	20275197	20275918
chr2	20297735	20298734
Zv9_scaffold3497	26737	27096
chr2	34471244	34474971
chr15	42199748	42200755
Zv9_NA963	18602	19112
chr13	52151449	52152119
chr13	52236794	52237466
chr21	25230444	25231342
chr13	52228411	52229760
chr9	2436341	2436717
Zv9_NA372	155522	155983
Zv9_NA372	161054	161637
chr6	56294589	56296434
chr8	1403939	1404507
chr5	18984758	18985636
Zv9_NA810	23910	24402
chr20	44864214	44866353
chr20	45134174	45135090
chr16	670949	671802
chr9	30781115	30783345
chr24	43089067	43089408
chr2	2774949	2775492
chr19	48145244	48146550
chr24	36407635	36409205
chr15	7256712	7259842
chr2	13699173	13700163
chr18	41410551	41411852
chr18	41465131	41468639
chr18	41498033	41498548
chr18	41525464	41526055
Zv9_scaffold3535	279862	280228
Zv9_NA859	10741	11215
chr4	60168092	60169011
chr6	53627733	53628367
chr18	2893995	2896032
chr15	3170027	3170761
chr15	3173238	3175219
chr25	1779692	1779940
chr20	4321380	4321992
chr20	4368889	4369552
chr12	8884194	8884714
chr7	68250368	68252470
Zv9_NA345	69549	69985
chr23	34780340	34781710
chr25	5504514	5505511
chr25	5561140	5562049
chr14	17228864	17230050
chr16	8344700	8345515
chr13	7307749	7310701
chr13	7293775	7295044
chr13	7291537	7292711
chr13	7286391	7287230
chr19	35420605	35421959
chr15	43249648	43250294
Zv9_NA403	17272	18600
chr5	12531816	12533186
chr13	2789027	2790223
chr25	2882489	2883469
chr15	5885781	5886398
chr23	21165428	21167418
chr23	21168335	21169703
chr23	21118544	21119335
chr18	46876534	46878919
chr18	46870709	46872516
chr4	23558599	23559547
chr17	36223981	36225953
chr7	73265966	73267513
chr8	8230847	8231349
chr8	2164940	2165540
chr10	16854613	16855673
chr24	43849003	43849357
chr10	4115321	4116442
Zv9_NA815	16687	20724
Zv9_NA173	48361	49309
chr12	44915116	44917980
chr2	58080509	58081052
chr7	73137839	73139964
chr14	27302468	27304152
Zv9_NA227	3735	4711
chr12	46860371	46861130
chr2	83360	83903
chr15	3105351	3105626
chr5	62819023	62823216
chr16	55118635	55119390
chr16	55123281	55124208
chr18	23497160	23498846
chr18	23456858	23458775
chr18	23397593	23398761
chr18	23376868	23378377
chr13	20579817	20581714
chr19	459205	460026
chr12	2444206	2444683
chr10	3727036	3727742
chr23	44480505	44482526
chr19	2289083	2290839
chr14	47590266	47591405
Zv9_NA372	90169	91151
Zv9_NA372	5322	6278
chr12	8677502	8677892
chr20	4488888	4489581
chr20	4485312	4488398
chr20	4477679	4478216
chr11	4980242	4981894
chr14	37801039	37802342
chr15	11326369	11327031
Zv9_scaffold3485	16161	16731
Zv9_scaffold3485	20358	22939
chr3	4360794	4361761
chr3	5706341	5707068
chr16	14219708	14220292
chr1	30759301	30761779
chr16	51254250	51258082
chr2	931886	932278
chr13	1898675	1899217
Zv9_scaffold3460	15647	17793
chr17	42206956	42208947
chr17	42088281	42088992
chr17	42020046	42020560
chr17	41672124	41672856
chr17	41670136	41670950
chr17	41597358	41598228
chr17	41564653	41565504
Zv9_scaffold3492	179447	179944
Zv9_scaffold3492	162123	163518
Zv9_scaffold3492	153650	154289
Zv9_scaffold3492	144319	146387
Zv9_scaffold3492	140774	142082
Zv9_scaffold3492	132363	133420
Zv9_scaffold3492	126940	128046
Zv9_scaffold3492	93911	94652
Zv9_scaffold3492	76884	77586
chr20	44419305	44420052
Zv9_scaffold3471	15399	16742
Zv9_scaffold3471	104445	105648
Zv9_scaffold3471	134774	135806
Zv9_scaffold3471	441709	442601
Zv9_scaffold3471	444528	448082
chr11	24743849	24745500
chr11	24680919	24681695
chr11	24674696	24675847
chr11	24670864	24672325
chr11	24664252	24665413
chr11	24650860	24652000
chr11	24643670	24644920
Zv9_scaffold3551	51727	52961
chr9	52541038	52541472
chr2	20359150	20360481
chr2	25063487	25064545
chr2	25221318	25221857
chr2	25366800	25368156
chr13	53406940	53407986
chr22	36368888	36369712
chr7	13497172	13498298
Zv9_scaffold3540	201362	202312
Zv9_scaffold3540	142549	142992
chr6	44760156	44760876
Zv9_scaffold3500	238385	239404
Zv9_scaffold3500	243215	243879
chr9	52921468	52921984
chr16	46721946	46723510
chr5	10124770	10125369
chr12	22670473	22671229
chr17	36311937	36312915
chr23	5403475	5405530
chr23	5529246	5530250
chr23	5577730	5578997
chr8	29445224	29446166
chr9	4904562	4905397
chr9	4910405	4915167
chr9	4920092	4920864
chr14	29213017	29213578
chr14	29204329	29204849
chr9	4934624	4935866
Zv9_NA144	17406	18771
chr1	4179341	4180148
chr1	4494458	4496490
chr1	4499245	4500316
chr1	5270858	5272973
chr1	5286343	5287215
chr1	5320191	5321182
chr1	5328806	5329970
chr1	5655731	5656244
chr1	7081933	7083165
chr1	8096741	8097999
chr1	8392056	8392515
chr1	8424646	8425226
chr1	8444808	8445843
chr1	4929602	4930135
chr1	4975287	4976170
chr1	10675679	10678068
chr1	10852011	10852563
chr1	11209808	11210560
chr24	37103399	37104920
chr1	12119736	12120713
chr1	12180079	12182283
chr1	12245166	12246171
chr1	14046283	14048303
chr1	14109277	14110114
chr1	14516112	14517039
chr1	14581498	14583134
chr1	15034652	15035197
chr1	15179994	15180741
chr1	15180767	15181841
chr1	15186690	15188245
chr1	15190892	15191800
chr1	15306566	15307368
chr1	15304707	15306388
chr1	15499348	15504568
chr1	15519389	15521062
chr1	15995795	15996291
chr1	16040950	16042563
chr1	16053254	16054096
chr1	16058316	16060341
chr1	16060867	16061762
chr1	16205860	16206770
chr1	16227599	16229337
chr1	16231684	16232241
chr1	16300029	16301111
chr1	17123034	17124685
chr1	17124742	17126962
chr1	17182129	17182868
chr1	17347927	17348922
chr1	17458128	17458608
chr1	18156695	18158463
chr1	18675418	18678216
chr1	19991612	19992785
chr1	20003995	20005218
chr1	20073056	20076105
chr1	20428355	20429641
chr1	20569375	20569986
chr1	29713703	29715299
chr1	29479997	29481478
chr1	29167992	29169546
chr1	28776547	28777374
chr1	28686020	28687834
chr1	28603509	28604846
chr1	28149564	28151988
chr1	22876651	22878023
chr1	22917574	22918283
chr1	23621048	23621678
chr1	23713950	23714648
chr1	23747623	23749245
chr1	23755833	23758279
chr1	23758593	23759620
chr1	23764291	23765284
chr1	23789197	23789995
chr1	23938222	23940319
chr1	24102269	24103396
chr1	21703061	21703539
chr1	21955535	21956688
chr1	22151641	22152201
chr1	22226380	22227591
chr1	22435129	22436336
chr1	22601532	22602119
chr1	27469253	27471499
chr1	27472161	27472999
chr1	27453469	27454288
chr1	24844704	24846428
chr1	25130099	25130818
chr1	25792943	25796100
chr1	25800530	25801374
chr1	25841651	25844713
chr1	25860022	25860907
chr1	25919021	25921929
chr1	25965763	25967288
chr1	31010873	31011736
chr1	31290686	31291766
chr1	32480348	32481224
chr1	37076218	37077516
chr1	37073722	37074394
chr1	36241524	36242680
chr1	36076597	36077718
chr1	35915015	35916473
chr1	35842076	35844302
chr1	35777736	35779795
chr1	35720315	35722170
chr1	35514757	35517778
chr1	35508808	35511295
chr1	35506750	35508532
chr1	35440281	35441650
chr1	35405517	35407536
chr1	35350133	35352216
chr1	35269081	35269651
chr1	38592561	38593255
chr1	38585118	38585919
chr1	38495362	38496147
chr1	38463560	38464837
chr1	38293166	38293900
chr1	38281110	38281950
chr1	38276696	38280147
chr1	40802939	40803892
chr1	40768941	40769542
chr1	40710287	40711179
chr1	40290932	40294000
chr1	39579186	39580184
chr1	39564445	39564933
chr1	39557230	39557865
chr1	39546494	39548698
chr1	39484472	39485108
chr1	39336002	39341651
chr1	41278099	41280832
chr1	45001604	45002757
chr1	45639546	45640013
chr1	46072065	46072517
chr1	46249585	46251060
chr1	42247108	42248285
chr1	42393995	42394599
chr1	42799889	42800554
chr1	43159881	43162019
chr1	43450477	43451095
chr1	43476635	43478261
chr1	44394598	44396899
chr1	46696474	46699145
chr1	46972657	46973178
chr1	47453860	47454469
chr1	47571865	47573642
chr1	47573981	47576875
chr1	47692484	47693461
chr1	47778394	47779607
chr1	48018783	48019944
chr1	48206360	48207146
chr1	50190964	50191652
chr1	49842902	49848116
chr1	49840233	49842654
chr1	49833790	49835817
chr1	49828963	49829496
chr1	49820757	49822385
chr1	49818792	49820030
chr1	49797482	49798874
chr17	10788338	10789104
chr17	10796713	10799130
chr1	50279152	50281825
chr1	50292814	50293366
chr1	50339209	50341401
chr1	50372741	50373418
chr1	50375174	50377503
chr1	50402356	50404433
chr1	50406257	50407184
chr1	51155958	51157266
chr1	51302898	51303908
chr1	51377505	51378730
chr1	51692167	51694182
chr1	51689054	51690344
chr1	51972062	51973311
chr1	51940280	51940809
chr1	52264651	52265533
chr1	52295751	52296323
chr1	52323901	52325384
chr1	52816207	52816951
chr1	53312689	53313390
chr1	54565736	54567679
chr1	54593241	54595400
chr1	54911619	54912189
chr1	54899059	54900377
chr1	55261419	55263186
chr1	56185751	56186529
chr1	54718640	54719616
chr1	52900790	52901625
chr1	57273909	57275353
chr1	57653172	57653963
chr8	258609	259117
chr10	738085	740302
chr10	745364	746503
chr10	1145429	1147498
chr10	1154066	1156062
chr10	1207391	1208221
chr10	1254373	1255018
chr10	1778568	1779817
chr10	1835520	1836977
chr10	4126895	4129831
chr10	4131752	4133425
chr10	4135769	4137084
chr10	4144369	4145581
chr10	4188707	4190306
chr10	4198386	4199086
chr10	4214249	4215263
chr10	4234814	4235593
chr10	4629464	4630730
chr10	5444403	5444947
chr10	8650576	8652790
chr10	8150958	8152749
chr10	6693835	6694425
chr10	7386279	7386890
chr10	7358078	7358829
chr10	9568006	9569698
chr10	8702253	8703255
chr10	14931182	14934949
chr10	15108913	15109803
chr10	15422760	15424836
chr10	15508721	15510144
chr10	15523339	15525552
chr10	16201068	16202408
chr10	16260458	16263620
chr10	13288816	13289543
chr10	13571201	13573402
chr10	14346761	14348273
chr10	11650759	11652428
chr10	11455134	11456174
chr10	11138099	11138758
chr10	10902095	10902897
chr10	10900771	10902054
chr10	10834089	10834626
chr10	10820326	10822168
chr10	10802179	10804106
chr10	10790606	10791422
chr10	10305176	10306196
chr10	10088251	10089183
chr10	19390975	19392726
chr10	19060606	19061703
chr10	18836289	18838073
chr10	18834950	18835825
chr10	18816554	18817539
chr10	18245825	18246488
chr10	18225784	18226572
chr10	18223266	18224654
chr10	18006620	18008006
chr10	17823983	17824630
chr10	17749340	17751889
chr10	17535958	17536628
chr10	17507859	17509619
chr10	17462505	17463059
chr10	17456407	17459160
chr10	17445955	17446600
chr10	22355454	22357463
chr10	21052617	21057245
chr10	20221997	20225073
chr10	19981261	19983154
chr10	19939105	19940411
chr10	26325890	26326553
chr10	26664954	26668731
chr10	26716637	26719461
chr10	26730124	26731185
chr10	27724881	27725799
chr10	27787261	27789082
chr10	27790891	27793447
chr10	27872203	27872863
chr10	27889747	27890596
chr10	27902860	27904056
chr10	27918677	27920788
chr10	28049817	28051565
chr10	28124045	28126539
chr10	28154936	28156396
chr10	23417413	23418623
chr10	23465303	23466753
chr10	23494441	23496144
chr10	23513761	23515145
chr10	23562431	23562948
chr10	23652482	23653397
chr10	23897315	23897959
chr10	24351253	24352285
chr10	24617040	24619304
chr10	24947102	24948772
chr10	24959385	24961204
chr10	25014397	25015823
chr10	28754452	28756026
chr10	29430607	29431357
chr10	29437154	29437865
chr10	29447840	29448920
chr10	29477756	29479301
chr10	29480741	29482648
chr10	29484859	29487105
chr10	29488270	29489138
chr10	29503470	29504454
chr10	30729622	30730916
chr10	31542523	31543100
chr10	31552319	31555387
chr10	31974512	31975188
chr10	32061728	32062780
chr10	32063584	32065235
chr10	32185314	32186430
chr10	32301390	32302862
chr10	32493541	32495518
chr10	32550002	32551463
chr10	33160763	33161541
chr10	33161710	33162255
chr10	33167271	33168406
chr10	33667970	33668567
chr10	33671052	33672141
chr10	34006862	34007981
chr10	34643855	34644626
chr10	34902437	34903281
chr10	35443941	35445061
chr10	35924318	35925182
chr10	36512776	36513672
chr10	36515853	36516483
chr10	37079500	37082007
chr10	37307520	37308561
chr10	37579687	37582036
chr10	37592192	37592756
chr10	38459839	38460480
chr10	38824826	38825381
chr10	39019262	39019848
chr10	39509666	39510520
chr10	39554809	39555641
chr10	39712385	39713305
chr10	39707633	39708584
chr10	39704452	39705583
chr10	39701906	39702642
chr10	41189177	41189932
chr10	41114159	41114784
chr10	41013043	41013978
chr10	40696118	40696724
chr10	42172944	42174187
chr10	43794703	43796260
chr10	43579904	43580923
chr10	44868176	44868813
chr10	45039191	45040409
chr10	46056218	46056850
chr10	46070440	46072300
chr10	46095877	46097254
chr10	45793469	45795028
chr10	45882218	45883394
chr10	45891174	45892075
chr11	205595	207158
chr11	362916	363712
chr11	320620	321381
chr11	32195	32719
chr11	1505267	1506669
chr11	2145139	2146970
chr11	3170901	3171411
chr11	3181737	3184396
chr11	2698645	2699314
chr11	3794012	3794742
chr11	3797150	3798346
chr11	3820102	3821751
chr11	3826809	3827609
chr11	3833047	3833985
chr11	4323460	4324329
chr11	5225026	5225982
chr11	5262326	5262982
chr11	5268219	5269524
chr11	5507965	5508630
chr11	6640030	6640598
chr11	6682337	6683589
chr11	11238428	11239523
chr11	8186858	8188089
chr11	8006686	8007327
chr11	7981572	7983004
chr11	7967377	7967919
chr11	7690030	7691438
chr11	7654791	7656054
chr11	7635163	7636833
chr11	7521281	7521941
chr11	8737136	8739387
chr11	8674687	8675701
chr11	8616714	8617794
chr11	8615532	8616712
chr11	10437010	10437587
chr11	10927006	10928494
chr11	11024797	11026709
chr11	11044171	11044894
chr11	10042183	10043636
chr11	9217270	9218173
chr11	12922053	12924470
chr11	13913868	13915527
chr11	14531224	14532858
chr11	14791552	14792936
chr11	14805676	14807017
chr11	18338618	18339538
chr11	18019316	18021413
chr11	16887087	16888130
chr11	16868525	16870156
chr11	16866128	16867257
chr11	16808778	16810875
chr11	16754829	16756569
chr11	16739281	16742206
chr11	16736702	16737347
chr11	19021163	19022711
chr11	19159900	19160474
chr11	19306955	19308414
chr11	19414895	19415529
chr11	19452184	19452686
chr11	19462027	19463302
chr11	19486415	19486978
chr11	19632976	19633530
chr11	19873676	19875471
chr11	20449651	20453069
chr11	20840151	20840740
chr11	21171947	21173751
chr11	24398043	24400517
chr11	23993657	23994976
chr11	23987107	23988398
chr11	23927654	23930374
chr11	23878573	23880859
chr11	23874917	23875530
chr11	23862611	23864555
chr11	23218536	23219400
chr11	23178041	23179930
chr11	23092296	23092776
chr11	23031671	23033989
chr11	22923503	22924123
chr11	22917260	22919099
chr11	22866962	22868791
chr11	22827052	22829056
chr11	22812763	22816617
chr11	22806951	22808805
chr11	22805114	22806919
chr11	22774765	22777582
chr11	22698500	22698998
chr11	22544049	22544926
chr11	22535085	22536273
chr11	22531493	22532932
chr11	22525123	22527180
chr11	22492414	22494803
chr11	22487502	22489446
chr11	22449266	22450792
chr11	22380957	22381965
chr11	22378280	22379769
chr11	22011487	22013891
chr16	3706138	3707104
chr11	25121918	25122705
chr11	25194200	25195389
chr11	25855184	25855882
chr11	25872899	25874863
chr11	25897225	25897876
chr11	26065690	26066801
chr11	26901922	26902916
chr11	26955588	26956562
chr11	26976263	26978138
chr11	27001021	27002100
chr11	27048954	27049830
chr11	27052527	27053516
chr11	27080890	27083283
chr11	27093667	27094563
chr11	27186179	27187195
chr11	27242082	27247156
chr11	28145601	28146654
chr11	28493060	28493748
chr11	29128597	29129478
chr11	29190583	29191815
chr11	29192775	29193951
chr11	29220500	29221527
chr11	29223184	29224109
chr11	29227966	29229627
chr11	29247002	29248234
chr11	29258846	29260402
chr11	29283121	29283901
chr11	29284370	29285750
chr11	29287286	29289573
chr11	29300100	29300866
chr11	29436778	29438275
chr11	29438870	29441354
chr11	29512837	29513468
chr11	29611277	29612291
chr11	29658381	29658945
chr11	29777140	29778134
chr11	30033387	30033914
chr11	30310673	30311457
chr11	32282976	32287264
chr11	32198683	32199654
chr11	32155977	32156883
chr11	32108134	32109018
chr11	31910069	31911073
chr11	31907386	31910043
chr11	31487026	31487612
chr11	31356482	31358328
chr11	32499259	32500256
chr11	32503626	32504572
chr11	33979105	33980871
chr11	34202499	34203277
chr11	34231818	34232285
chr11	34234926	34238096
chr11	35244954	35246126
chr11	35748148	35750559
chr11	35745422	35746061
chr11	35630578	35631683
chr11	35608880	35611678
chr11	35600610	35601173
chr11	35598714	35600242
chr11	35594531	35595134
chr11	35580488	35580955
chr11	36658189	36658783
chr11	37529500	37530922
chr11	37322424	37323765
chr21	36448369	36450187
chr11	40310711	40311673
chr11	39088880	39089636
chr11	38989088	38990607
chr11	38962885	38963844
chr11	38954220	38954976
chr11	38912756	38914408
chr11	40709590	40710892
chr11	41534269	41535037
chr11	42179690	42180390
chr11	42869724	42870951
chr11	43083230	43083668
chr11	43095625	43096990
chr11	43118336	43119105
chr11	43140640	43141935
chr11	43368530	43369547
chr11	45525320	45527743
chr11	46359663	46362044
chr24	40553482	40554554
chr12	265161	265816
chr17	1917928	1919653
chr17	1929486	1930962
chr17	1934371	1937403
chr17	1938536	1939626
chr17	1986638	1987728
chr12	1984399	1985558
chr12	2998138	2998942
chr12	4605742	4607217
chr12	5357257	5357904
chr12	6561667	6562260
chr12	6524340	6525605
chr12	6521203	6522244
chr12	6473762	6475468
chr12	6471844	6473213
chr12	6446877	6448417
chr5	3389271	3390970
chr12	9462161	9462820
chr12	9605675	9606259
chr12	9611962	9613959
chr12	9698886	9700232
chr12	10646073	10646600
chr12	11548509	11551038
chr12	11587739	11588307
chr12	11625003	11625476
chr12	11625513	11626002
chr12	8812504	8813097
chr12	12015436	12016551
chr12	12047397	12048103
chr12	13463869	13466856
chr12	18512305	18513364
chr12	18410680	18412514
chr12	17040779	17042018
chr12	17075557	17077129
chr12	19664126	19665348
chr12	19984042	19985203
chr12	20229880	20232148
chr12	20334485	20335433
chr12	20671995	20672556
chr12	20718928	20721892
chr12	21830414	21831861
chr12	21771942	21772604
chr12	29127913	29128427
chr12	29112033	29112773
chr12	29071492	29072369
chr12	29028644	29029559
chr12	29019401	29020083
chr12	28721723	28724668
chr12	28716704	28719013
chr12	28691942	28692897
chr12	28575996	28577662
chr12	28567711	28568662
chr12	28386130	28386845
chr12	28347701	28349267
chr12	28204900	28205590
chr12	28164963	28165683
chr12	27651908	27652550
chr12	27397296	27397819
chr12	27207037	27207560
chr12	27125380	27125964
chr12	27095654	27096809
chr12	27017934	27019662
chr12	26759600	26761959
chr12	22883876	22884408
chr12	22874684	22875500
chr12	23487181	23488041
chr12	23588988	23589525
chr12	23609824	23612528
chr12	29990139	29991283
chr12	30014701	30016697
chr12	30238642	30239653
chr12	30581851	30582424
chr12	31415451	31417846
chr12	31567920	31568412
chr12	23647223	23649645
chr12	23651290	23651930
chr12	23656159	23657235
chr12	23679674	23681380
chr12	24179570	24180881
chr12	24193173	24194452
chr12	24273749	24274199
chr12	25033290	25034317
chr12	25065540	25066288
chr12	25252856	25253500
chr12	25595216	25597067
chr12	25929564	25930415
chr12	26083777	26084566
chr12	26526863	26528248
chr12	32673795	32677532
chr12	32704251	32705627
chr12	32721175	32724669
chr12	32758869	32759974
chr12	32760096	32763919
chr12	32767581	32769336
chr12	32771787	32773204
chr12	32774025	32778757
chr12	32842268	32842885
chr12	33232332	33233073
chr21	32155846	32156429
chr21	32430311	32436071
chr12	34628228	34629512
chr12	35144231	35144920
chr12	36821385	36822806
chr12	36817219	36818429
chr12	36813983	36814890
chr12	36739630	36740701
chr12	36662333	36663536
chr12	36657460	36658917
chr12	36619296	36621506
chr12	36360259	36361052
chr12	36334406	36335748
chr12	36076559	36077576
chr12	36098340	36100649
chr12	38140800	38141569
chr12	38134086	38135356
chr12	37924582	37926008
chr12	37888519	37889503
chr12	37884737	37886662
Zv9_NA99	64354	66213
chr12	38281551	38282507
chr12	38283247	38283844
chr12	38289118	38289745
chr12	38336478	38337036
chr12	38513962	38515478
chr12	38518157	38521531
chr12	38530254	38531315
chr12	38532894	38535343
chr12	38679671	38681048
chr12	38685109	38685742
chr12	38698836	38700372
chr12	38701104	38702711
chr12	38721326	38722228
chr12	38732956	38734509
chr12	38760835	38762228
chr12	40004908	40005749
chr12	40051093	40052269
chr12	40079296	40081025
chr12	40132017	40133163
chr12	40745247	40745761
chr11	31274043	31275284
chr11	31269869	31270430
chr12	44198906	44199570
chr12	44234052	44237679
chr12	44276049	44278744
chr12	44287696	44288679
chr16	2310143	2310564
chr16	2308030	2309357
chr16	1667836	1668814
chr16	1645756	1646540
chr12	45634248	45635209
chr12	45628719	45630719
chr12	46697276	46698746
chr12	46666649	46667886
chr12	46588923	46590978
chr12	46762240	46763276
chr12	48023905	48024427
chr12	50117772	50118338
chr12	49867266	49867810
chr13	975244	978837
chr13	34343243	34344259
chr13	34347395	34349049
chr13	34360172	34362295
chr13	34375204	34376096
chr13	34389029	34389560
chr13	34659850	34661239
chr13	34698758	34699975
chr13	34980609	34981468
chr13	35000658	35001211
chr13	2766699	2767992
chr13	2870410	2871755
chr13	2859544	2860194
chr13	2858006	2859227
chr13	2848190	2848597
chr13	3262998	3263820
chr13	4167829	4171500
chr13	4571059	4572934
chr13	4577049	4577715
chr13	4578729	4579740
chr13	5065062	5065566
chr13	5079477	5080363
chr13	5091179	5091748
chr13	5120650	5121078
chr13	5128730	5132256
chr13	5169610	5179417
chr13	5179487	5181334
chr13	5182374	5184038
chr13	5193079	5204926
chr13	5206415	5207784
chr13	5208740	5210935
chr13	5211225	5214953
chr13	5217939	5218545
chr13	5218722	5226726
chr13	5227551	5229240
chr13	5235374	5236328
chr13	5258371	5259795
chr13	5270228	5270936
chr13	5272376	5274147
chr13	5279819	5281367
chr13	5288906	5290251
chr13	5298463	5299170
chr13	5438892	5440244
chr13	5449460	5451447
chr13	5468996	5469925
chr13	5792765	5793534
Zv9_NA824	36044	37332
chr13	7004096	7004994
chr13	6889945	6890500
chr13	6692776	6693916
chr13	6668151	6668691
chr13	7527260	7527848
chr13	7552711	7554033
chr13	7581750	7582352
chr13	7587708	7589423
chr13	7595703	7597482
chr13	7799207	7800265
chr13	7871808	7872555
chr13	9107037	9108529
chr13	9339014	9339828
chr13	9939911	9941596
chr13	10031495	10033033
chr13	10081104	10083519
chr13	10421402	10422165
chr13	10495267	10496107
chr13	10577158	10578794
chr13	11101307	11102479
chr13	11136386	11137929
chr13	11167437	11168960
chr13	11658962	11660647
chr13	11619896	11620525
chr13	13144561	13145363
chr13	13137602	13138575
chr13	19869728	19870736
chr13	20389098	20390144
chr13	16130115	16132313
chr13	16227054	16227689
chr13	16537132	16539301
chr13	16544301	16545093
chr13	16772449	16773780
chr13	17055240	17056267
chr13	17068193	17069565
chr13	17070303	17072172
chr13	17083529	17084625
chr13	17233536	17234837
chr13	17242827	17244685
chr13	17248376	17249089
chr13	17270320	17271869
chr13	17290787	17291680
chr13	17299039	17300546
chr13	17300691	17301693
chr13	17303012	17303945
chr13	17305270	17306613
chr13	17311082	17315107
chr13	17315246	17315771
chr13	17317424	17318053
chr13	17371535	17373651
chr13	17373968	17374921
chr13	17392577	17394775
chr13	17421739	17422178
chr13	17428472	17430309
chr13	17432338	17432971
chr13	17438910	17444960
chr13	17445840	17448016
chr13	17452793	17454986
chr13	17481573	17484400
chr13	17486238	17487496
chr13	17496272	17498355
chr13	17509031	17509573
chr13	17602760	17603989
chr13	17666662	17667731
chr13	17726830	17728868
chr13	17892332	17894488
chr13	17929567	17930107
chr13	18182899	18183603
chr13	18374634	18375949
chr13	18459140	18459822
chr13	18494069	18494820
chr13	18495507	18496983
chr13	18855017	18856028
chr13	18862276	18863536
chr13	18874876	18877634
chr13	18893557	18895121
chr13	18902292	18903093
chr13	21484093	21485205
chr13	21486359	21487066
chr13	21556691	21560398
chr13	21988531	21991192
chr13	22157829	22159282
chr13	22187535	22188890
chr13	22197265	22200275
chr13	22240629	22241947
chr13	22245901	22247277
chr13	23052316	23052996
chr13	23437216	23438456
chr13	24380724	24381819
chr13	24872618	24877428
chr13	25320594	25321450
chr13	25324834	25326228
chr13	25330002	25331295
chr13	25495396	25497654
chr13	25499728	25501367
chr13	25950469	25951187
chr13	26024387	26024808
chr13	26115468	26116604
chr13	26118471	26120018
chr13	26158920	26160046
chr13	26167388	26169526
chr13	26257506	26260441
chr13	26418635	26419966
chr13	26548960	26549476
chr13	26602218	26602850
chr13	26614056	26614832
chr13	27222681	27225456
chr13	27474625	27476481
chr13	29325486	29326410
chr13	29359251	29365157
chr13	29366483	29368093
chr13	29377634	29378759
chr13	29379738	29381043
chr13	29382798	29384990
chr13	29485776	29486567
chr13	29583096	29583698
chr13	29737059	29738774
chr13	29917312	29918560
chr13	29938169	29940758
chr13	30006503	30009575
chr13	30066238	30067960
chr13	30209327	30210129
chr13	30210503	30212403
chr13	30225719	30226531
chr13	30485033	30486398
chr13	30534957	30538125
chr13	30571227	30571861
chr13	30600464	30602282
chr13	30605345	30606358
chr13	30633084	30634475
chr13	30685725	30687755
chr13	30689361	30691065
chr13	30710383	30712403
chr13	30754497	30757697
chr13	30792999	30793557
chr13	31037618	31039370
chr13	31049541	31050778
chr13	31119904	31122169
chr13	31165974	31166430
chr13	31482547	31484568
chr13	31485033	31486424
chr13	31497020	31497829
chr13	32207511	32208567
chr13	32495947	32497148
chr13	32556792	32557615
chr13	32565842	32566650
chr13	33138339	33140170
chr13	29059674	29060481
chr13	28795637	28796133
chr13	28650228	28652298
chr13	28522242	28523781
chr13	35410150	35411206
chr13	35397929	35398364
chr13	34309493	34310628
chr13	34284282	34285183
chr13	34270122	34271587
chr13	34222610	34223679
chr13	34197783	34198732
chr13	34192217	34192749
chr13	34188119	34189481
chr13	34185746	34186321
chr13	34170364	34172591
chr13	34166425	34169148
chr13	34149339	34150587
chr13	34143840	34147525
chr13	34141508	34142959
chr13	34137146	34138531
chr13	34121450	34122906
chr13	34119078	34120856
chr13	34117394	34119038
chr13	34112885	34114029
chr13	34107864	34108613
chr13	34099177	34100816
chr13	34073835	34075277
chr13	34067769	34070549
chr13	35477227	35478432
chr13	35501886	35507365
chr13	35765558	35766687
chr13	36403126	36404623
chr13	37060839	37061407
chr13	37346783	37347366
chr13	37341697	37342422
chr13	37340271	37341637
chr13	37376251	37377852
chr13	37510794	37511886
chr13	37557438	37557952
chr13	37558701	37559997
chr13	38299629	38300165
chr13	38952269	38953875
chr13	39425778	39426370
chr13	39647797	39648851
chr13	39666245	39668157
chr13	39682669	39684135
chr13	39767793	39768566
chr13	42403382	42404106
chr13	43650911	43653618
chr13	44396959	44398557
chr13	46344336	46345445
chr13	46512830	46513915
chr13	46517747	46519578
chr13	46524972	46526428
chr13	45695572	45697183
chr13	45674024	45674719
chr13	45602911	45603535
chr7	6034948	6035592
chr13	47329722	47331683
chr13	47319641	47320985
chr13	47351206	47352219
chr13	48112808	48113918
chr13	53014701	53016263
chr14	94675	95217
chr14	1794978	1795358
Zv9_NA584	69195	70891
chr14	1975894	1976574
chr14	5854156	5854711
chr14	5937427	5940006
chr14	5495010	5495952
chr14	5474259	5475715
chr14	5463607	5464245
chr14	5388299	5388988
chr14	5385074	5387487
chr14	5335684	5336704
chr14	5326521	5327290
chr1	37326111	37327268
chr14	7650147	7652397
chr14	7589488	7590422
chr14	7797600	7798515
chr14	7906196	7906780
chr14	7983905	7984650
chr14	7986077	7989310
chr14	7992073	7993461
chr14	8070869	8072114
chr14	8091617	8093332
chr14	8109331	8109829
chr14	8662382	8662887
chr14	9683762	9685375
chr14	10846188	10850412
chr14	11323343	11324308
chr14	11460364	11461505
chr14	12319966	12320913
chr14	13060683	13061746
chr14	13595428	13597019
chr14	13597210	13598522
chr16	19794495	19795562
chr14	18533760	18534325
chr14	18660329	18661420
chr14	18682198	18683003
chr14	18689538	18692295
chr14	18693638	18694691
chr14	18694776	18697067
chr14	18931862	18933149
chr14	19103541	19104357
chr14	19672065	19673641
chr14	19971252	19973610
chr14	15292837	15294230
chr14	14430230	14430707
chr14	16838288	16839307
chr14	17117825	17118407
chr14	17126560	17127313
chr14	20306857	20307986
chr14	20341788	20343088
chr14	20735427	20736022
chr14	20736192	20736779
chr14	21871067	21871641
chr14	22059806	22060762
chr14	22150434	22151980
chr14	22225739	22226173
chr14	23586272	23587782
chr14	24523343	24523885
chr14	24553447	24553927
chr14	24573525	24575513
chr14	24696242	24696768
chr14	25258316	25258698
chr14	25336686	25337590
chr14	25488545	25489184
chr14	25511479	25512265
chr14	25664795	25667389
chr14	25692839	25694714
chr14	25695305	25696561
chr14	25699796	25700976
chr14	25716562	25717941
chr14	25738692	25740238
chr14	25751608	25755330
chr14	25765385	25766349
chr14	26418954	26422103
chr14	26526822	26528103
chr14	27193415	27194080
chr14	27459308	27460783
chr14	27646489	27649028
chr14	27651269	27651745
chr14	27655707	27658059
chr14	27690551	27691562
chr14	27746552	27748993
chr14	28891867	28892583
chr14	28902091	28903594
chr14	28913343	28913887
chr14	28922323	28925398
chr14	28927809	28931047
chr14	28931899	28933090
chr14	28934051	28934781
chr14	29187813	29190716
chr14	29444342	29445315
chr14	29587850	29588404
chr14	31053237	31053848
chr14	31690024	31691954
chr14	31734939	31736275
chr14	31972189	31972835
chr14	32086269	32086718
chr14	32976286	32978376
chr14	32978813	32982727
chr14	33409637	33410646
chr14	33422610	33424460
chr14	33427468	33428107
chr14	33483241	33485638
chr14	33698908	33699423
chr14	33690392	33692639
chr14	33687454	33688556
chr14	33889437	33890868
chr14	33879940	33880452
chr14	33855601	33858421
chr14	33811448	33812106
chr14	33803589	33805990
chr14	33794071	33797445
chr14	33790478	33792276
chr14	33784714	33785504
chr14	33780830	33782063
chr14	33768692	33770898
chr14	33763590	33765249
chr14	33755226	33762307
chr14	33753012	33754484
chr14	34255919	34256451
chr14	34256897	34257536
chr14	34725454	34725994
chr14	35940976	35941427
chr14	35739922	35740869
chr14	35673780	35675375
chr14	35662537	35663344
chr14	35658308	35661043
chr14	35655972	35656775
chr14	36235686	36237641
chr14	36238956	36240373
chr14	36289612	36290662
chr14	36293187	36294764
chr14	36453041	36453954
chr14	36842857	36844076
chr14	36992797	36995907
chr14	36997901	37000680
chr14	37244578	37245231
chr14	37460084	37460893
chr14	38968753	38970066
chr14	38974104	38975227
chr14	39037635	39038518
chr14	39371209	39372348
chr14	40985274	40986193
chr14	40948098	40949637
chr14	40944973	40946268
chr14	40935211	40936617
chr14	40933102	40934202
chr14	40927263	40928321
chr14	40874562	40875077
chr14	40735136	40736007
chr14	40730783	40734376
chr14	40714170	40715406
chr14	40678341	40680438
chr14	40676098	40677211
chr14	40673325	40674465
chr14	44717923	44718478
chr14	41712891	41715654
chr14	41716894	41718673
chr14	41720559	41722157
chr14	41737120	41737594
chr1	4903859	4904891
chr14	41813436	41814328
chr14	41884171	41885687
chr14	41984125	41989455
chr14	41990206	41991384
chr14	42432494	42435271
chr14	43167600	43169174
chr14	43202432	43204315
chr14	44249253	44250583
chr14	44289222	44290288
chr14	44376232	44377222
chr14	44533964	44535226
chr14	44584972	44586348
chr14	44918342	44919308
chr14	44920321	44921411
chr14	44924527	44926535
chr14	45140243	45141095
chr14	45177930	45178542
chr14	45192684	45194075
chr14	45211834	45214145
chr14	45353604	45354267
chr14	50893292	50893784
chr14	51699084	51699958
chr24	35828512	35831232
chr24	36098707	36099685
chr14	51889031	51890312
chr14	53542170	53543475
chr14	53532705	53533542
chr15	74291	75790
chr15	2628426	2628918
chr15	2097665	2098653
chr15	2815434	2816089
chr16	6053996	6054826
chr15	4338232	4338752
chr15	4362306	4365310
chr15	4399800	4400423
chr15	4538281	4540256
chr15	4711634	4714671
chr15	5628910	5629666
chr15	7019356	7020905
chr15	13826537	13827444
chr15	11929595	11932419
chr15	10752515	10755162
chr15	10749742	10750604
chr15	10842772	10843630
chr15	8334134	8335408
chr15	8351906	8354139
chr15	8363568	8365703
chr15	8856917	8857514
chr15	9041084	9042126
chr15	9045504	9046318
chr15	13750860	13751738
chr15	13749703	13750696
chr15	13746864	13747459
chr15	13685670	13686678
chr15	2500983	2502542
chr15	2496224	2497064
chr15	14384827	14387253
chr15	14481172	14481629
chr15	14697615	14698746
chr15	15010787	15012233
chr15	15022844	15026991
chr15	15232000	15233782
chr15	15244980	15246133
chr15	15286642	15287593
chr15	15293462	15294446
chr15	15295019	15303434
chr15	15304380	15305703
chr15	15306526	15307395
chr15	15321518	15322132
chr15	15329995	15330749
chr15	15337830	15338810
chr15	15559351	15561775
chr15	15756367	15756954
chr15	15897610	15898391
chr15	16372865	16373677
chr15	16519346	16520879
chr15	16639800	16640789
chr15	16789109	16789590
chr15	16851694	16852204
chr15	17196993	17197668
chr15	17221481	17222224
chr15	17263808	17264803
chr15	17270711	17272718
chr15	17283383	17285213
chr15	17285302	17286202
chr15	17287738	17289191
chr15	17289698	17290850
chr15	9670361	9671099
chr15	17880700	17882170
chr15	18409799	18411411
chr15	18586788	18587668
chr15	18718570	18719637
chr15	19250961	19251802
chr15	19274334	19275034
chr15	19400567	19404004
chr15	19407704	19408470
chr15	19435190	19436195
chr15	19471428	19472242
chr15	19479779	19481252
chr15	19643487	19644604
chr15	19682223	19683195
chr15	20311955	20312891
chr15	20348579	20349330
chr15	20363876	20365457
chr15	20385235	20386420
chr15	20393613	20394729
chr15	20403251	20404405
chr15	20419108	20420724
chr15	20429573	20430066
chr15	20433353	20433977
chr15	20452425	20453768
chr15	20465929	20466868
chr15	20623960	20625781
chr15	20729033	20729786
chr15	20761138	20763298
chr15	20766986	20767699
chr15	20770943	20771528
chr15	20775043	20775787
chr15	20931879	20933402
chr15	21419708	21422894
chr15	21428664	21430182
chr15	22251574	22252857
chr15	22441322	22442322
chr15	23093168	23093646
chr15	23731847	23732873
chr15	23967984	23969235
chr15	24003796	24004444
chr15	24018435	24020613
chr15	24175269	24175872
chr15	24491439	24493246
chr15	24494323	24495294
chr15	24613560	24614945
chr15	24615176	24616159
chr15	26010757	26014079
chr15	26368858	26369509
chr15	26466887	26468087
chr15	26541319	26541920
chr15	26542612	26544077
chr15	26549997	26551533
chr15	26572711	26573674
chr15	26718347	26724674
chr15	27077673	27079331
chr15	27099040	27101474
chr15	27103418	27104380
chr15	27232977	27234604
chr15	27247219	27248406
chr15	27266688	27267893
chr15	27633187	27634950
chr15	27634972	27636044
chr15	27987743	27988934
chr15	28098045	28099616
chr15	28108060	28109321
chr15	28158486	28161725
chr15	28590208	28591498
chr15	28729721	28731869
chr15	28738331	28739206
chr15	28959506	28962482
chr15	29022047	29023468
chr15	29024850	29027767
chr15	29030554	29032605
chr15	29037220	29038055
chr15	29049653	29051317
chr15	29472660	29473169
chr15	29498008	29499698
chr15	29779384	29780565
chr15	29844294	29844975
chr15	29846490	29849636
chr15	29854089	29854578
chr15	29860272	29864986
chr15	29865935	29867862
chr15	29868946	29869553
chr15	29870091	29871256
chr15	29979656	29980288
chr15	29999561	30000568
chr15	30007734	30009007
chr15	30013970	30014860
chr15	30081929	30082552
chr15	30099785	30100676
chr15	30456640	30457950
chr15	31141040	31143047
chr15	31786458	31787043
chr15	31790112	31791452
chr15	32214178	32214707
chr15	32241307	32242182
chr15	32307490	32308679
chr15	32394145	32395066
chr15	32525664	32526320
chr15	32527759	32528765
chr15	32531479	32532538
chr15	32546091	32547870
chr15	32553937	32554496
chr15	32554561	32555857
chr15	32556125	32557032
chr15	33056544	33057324
chr15	33322370	33323558
chr15	33397768	33399276
chr15	33583193	33585318
chr15	34013523	34014101
chr15	34267637	34268636
chr15	34457464	34458108
chr15	34485114	34486524
chr15	34607477	34608375
chr15	34850681	34851787
chr15	34857216	34857667
chr15	35093093	35093747
chr15	35515500	35516994
chr15	35584586	35585515
chr15	35649559	35650187
chr15	35651807	35652373
chr15	35814272	35818206
chr15	35827025	35827864
chr15	35966968	35967709
chr15	36072553	36074828
chr15	37769546	37770914
chr15	37764675	37765329
chr15	37590073	37591060
chr15	37572753	37574602
chr15	37530759	37531156
chr15	37522909	37523722
chr15	37512790	37518086
chr15	38181874	38183516
chr15	38178619	38179797
chr15	38125142	38126519
chr15	38095729	38097460
chr15	38056188	38056689
chr15	38286861	38287976
chr15	38288556	38289928
chr15	38301589	38302107
chr15	38380859	38381690
chr15	39187274	39187971
chr15	40345432	40346912
chr15	40505990	40506721
chr15	40942184	40945385
chr15	44455880	44457344
chr15	44750777	44751807
chr15	46426149	46426819
chr16	894865	896560
chr16	116072	117603
chr16	1108947	1110425
chr16	1415709	1416928
chr16	1428607	1429282
chr16	1471629	1472145
chr16	4358612	4359374
chr16	3488311	3488999
chr16	5109877	5110322
chr16	5614764	5615964
chr17	13593273	13594569
chr17	13594737	13595820
chr16	6670691	6671228
chr16	6763834	6765548
chr16	7523329	7524785
chr16	7539060	7540836
chr16	7839295	7840095
chr16	8289324	8290611
chr16	8635251	8636025
chr16	8637324	8639005
chr16	8653246	8658143
chr16	8665189	8665844
chr16	8670897	8672068
chr16	8705074	8705719
chr16	8706671	8708373
chr16	8712329	8713556
chr16	8722640	8724344
chr16	8726754	8728531
chr16	8736718	8738969
chr16	8741286	8742423
chr16	8744987	8746606
chr16	8749687	8750703
chr16	8941995	8943377
chr16	9695491	9697905
chr16	9711724	9712387
chr16	9869815	9871017
chr16	10529154	10530347
chr16	12162961	12163819
chr16	12183099	12184269
chr16	12189186	12190256
chr16	12192498	12194851
chr16	12200130	12201520
chr16	12228631	12230078
chr16	12654260	12655889
chr16	12851384	12852103
chr16	15000761	15002317
chr16	15024279	15025790
chr16	15054832	15056885
chr16	15111660	15113125
chr16	15339158	15340707
chr16	17220257	17222307
chr16	17224910	17225525
chr16	17542079	17543451
chr16	17453471	17454615
chr16	17438421	17439084
chr16	18239839	18240798
chr16	25156843	25157772
chr16	25142873	25144214
chr16	25141056	25142161
chr16	25132590	25134102
chr16	25110262	25112236
chr16	25103305	25105554
chr16	25087587	25088845
chr16	25011640	25012324
chr16	24469733	24470578
chr16	21274828	21276347
chr16	21309453	21310646
chr16	21336438	21337533
chr16	21347512	21348745
chr16	21382220	21382983
chr16	21390478	21391851
chr16	21393944	21395969
chr16	21398774	21404713
chr16	21577807	21578396
chr16	22713742	22714403
chr16	22737904	22738448
chr16	23064615	23065650
chr3	2771265	2773550
chr16	25468666	25469939
chr16	25529133	25532541
chr16	26193286	26193850
chr16	26231275	26231871
chr16	26315248	26317038
chr16	26318352	26320019
chr16	26320451	26321484
chr16	26323790	26324621
chr16	26352610	26353624
chr16	26357340	26358799
chr16	26361731	26362220
chr16	26368727	26370818
chr16	26392559	26393301
chr16	26409949	26410740
chr16	27372820	27374484
chr16	27464952	27465538
chr16	27518557	27519247
chr16	27813690	27814576
chr16	28487724	28488951
chr16	28764467	28765394
chr16	28830279	28830917
chr16	28942538	28943371
chr16	29171910	29173274
chr16	29260033	29261315
chr16	29615680	29616340
chr16	29679282	29681239
chr16	30057902	30060459
chr16	30061085	30062209
chr16	30221842	30222502
chr16	30998341	31002194
chr16	31032624	31033145
chr16	31136615	31137644
chr16	31327889	31328749
chr16	31395267	31397204
chr16	31401810	31403501
chr16	31488500	31489966
chr16	32074864	32076351
chr16	32848197	32848924
chr16	32971331	32972631
chr16	32980059	32980510
chr16	33286768	33287442
chr16	33388835	33389395
chr16	34544048	34545311
chr16	34702599	34703912
chr16	34831637	34833239
chr16	35052291	35054883
chr16	35062871	35064479
chr16	35422740	35424482
chr16	35653579	35654284
chr16	35912211	35913078
chr16	35989117	35995487
chr16	37352769	37353417
chr16	37750219	37751676
chr16	21056606	21058149
chr16	38949215	38949720
chr16	38423753	38425424
chr16	40980034	40982946
chr16	41132404	41132906
chr16	41151766	41152714
chr16	41187375	41187935
chr16	41312159	41313122
chr16	41314045	41315366
chr16	41396597	41397153
chr16	41612051	41613065
chr16	41690743	41692389
chr16	41696193	41697312
chr16	41877993	41878764
chr16	42052247	42052751
chr16	42071256	42072137
chr16	42088750	42090261
chr16	42116156	42117925
chr16	42163763	42164859
chr16	42192252	42193350
chr16	42204294	42205363
chr16	42351592	42352249
chr16	42354250	42355249
chr16	42413772	42415605
chr16	42777165	42778792
chr16	42845872	42847005
chr16	42851870	42854376
chr16	42854496	42856479
chr16	42859044	42860227
chr16	42866433	42867085
chr16	42871031	42871981
chr16	42872219	42873690
chr16	43287776	43288430
chr16	43395406	43397102
chr16	43423573	43424651
chr16	43429426	43431407
chr16	43866635	43868322
chr16	44279292	44281008
chr16	44294713	44295494
chr16	44526518	44528275
chr16	44871136	44872552
chr16	49307560	49309425
chr16	49301473	49303005
chr16	49298312	49299384
chr16	49292007	49294152
chr16	49290449	49291193
chr16	49123743	49124482
chr16	51533184	51534730
chr16	51631651	51632635
chr16	48108181	48108792
chr16	50680876	50681658
chr16	50752631	50753225
chr16	50462122	50463703
chr16	52840128	52841569
chr4	1790829	1791694
chr16	54699899	54701422
chr16	57393327	57394224
chr16	54998230	54998882
chr10	41294399	41295261
chr15	3558649	3559489
Zv9_NA291	600	1129
chr17	8227034	8227820
chr17	7021089	7021858
chr17	8366066	8367690
chr17	8364286	8364938
chr17	9048245	9049396
chr17	10546469	10547231
chr17	10256828	10258628
chr17	10079571	10080228
chr17	10064119	10065709
chr17	10931322	10933333
chr17	10925957	10926670
chr17	10904995	10905433
chr17	10892354	10893083
chr17	10720566	10721096
chr17	11603418	11604164
chr17	11605567	11606213
chr17	11613556	11614632
chr17	11792006	11792957
chr17	12336678	12338408
chr17	13738542	13739847
chr17	13722956	13724788
chr17	14371335	14371857
chr17	16633835	16636257
chr17	16608484	16609667
chr17	16562350	16562847
chr17	16544647	16545677
chr17	16340568	16341386
chr17	15858840	15859613
chr17	14905940	14907441
chr17	14901287	14903281
chr17	14882623	14883143
chr17	14768774	14769646
chr17	14706658	14708718
chr17	14704031	14706175
chr17	14684655	14685309
chr17	14677826	14681085
chr17	14664559	14665544
chr17	14598438	14599020
chr17	14437820	14439235
chr17	17437058	17438524
chr17	17507261	17507772
chr17	20275621	20276324
chr17	19578185	19578990
chr17	19572608	19573427
chr17	19568624	19569410
chr17	19560610	19561160
chr17	19300405	19301679
chr17	19189507	19190617
chr17	19178998	19180550
chr17	19061159	19061761
chr17	18667775	18668870
chr17	18555942	18557048
chr17	18499141	18499738
chr17	18445939	18455458
chr17	18443976	18445279
chr17	18373384	18374473
chr17	18136298	18136895
chr17	18133272	18135191
chr17	18118117	18119180
chr17	18083742	18085774
chr17	18081336	18082331
chr17	18004907	18005532
chr17	17996033	17997827
chr17	17993809	17995478
chr17	17988430	17989324
chr17	17982837	17986318
chr17	17964749	17966502
chr17	17758499	17760319
chr17	17756347	17757989
chr17	17752305	17752875
chr17	21119026	21119648
chr17	21236389	21238462
chr17	21480961	21481914
chr17	21503183	21507112
chr17	21540881	21543264
chr17	21546346	21547435
chr17	21603043	21604115
chr17	21628424	21629748
chr17	21640834	21642242
chr17	21924655	21925127
chr17	22319587	22320198
chr17	22348295	22349920
chr17	22872256	22873090
chr17	22917529	22919514
chr17	23280107	23282755
chr17	23390464	23391597
chr17	23924785	23925317
chr17	23999371	24000043
chr17	24070314	24071542
chr17	24072603	24074464
chr17	24089505	24090260
chr17	24168969	24169807
chr17	24177689	24179648
chr17	24194332	24196545
chr17	24226337	24227284
chr17	24228942	24230316
chr17	24239824	24240374
chr17	24277784	24278656
chr17	24379652	24380197
chr17	24855798	24856295
chr17	25289749	25291088
chr17	25640644	25643938
chr17	25819223	25820527
chr17	26093150	26095327
chr17	26110552	26111168
chr17	26112541	26114302
chr17	26114722	26115800
chr17	26117950	26119043
chr17	26130199	26131048
chr17	26397356	26398418
chr17	26649872	26650434
chr17	26694973	26700663
chr17	26797393	26797905
chr17	27026079	27028383
chr17	27039341	27039874
chr17	27429763	27430668
chr17	27460446	27461125
chr17	27751799	27753897
chr17	27754899	27755550
chr17	28097833	28098411
chr17	28110849	28111388
chr17	28114705	28115326
chr17	28820373	28823473
chr17	28825595	28826712
chr17	28832970	28833706
chr17	28893137	28893631
chr17	28926673	28927537
chr17	28931382	28932585
chr17	29088653	29092703
chr17	29097685	29098310
chr17	29350510	29351626
chr17	29391349	29392195
chr17	29475061	29476258
chr17	29860937	29862603
chr17	29864534	29865545
chr17	29871621	29872131
chr17	29874265	29875828
chr17	29877201	29878929
chr17	29910789	29911623
chr17	29921286	29924273
chr17	29924302	29925507
chr17	29937521	29938290
chr17	30249129	30252195
chr17	30573169	30573881
chr17	30658871	30662348
chr17	30959841	30960385
chr17	31085227	31086079
chr17	31136819	31137609
chr17	31483374	31484972
chr17	31823418	31824600
chr12	33858743	33859262
chr17	32774160	32775633
chr17	32880396	32881120
chr17	32883549	32884909
chr17	32884977	32886478
chr17	32886522	32887098
chr17	33030924	33032050
chr17	33032577	33034109
chr17	33035685	33036892
chr17	33038286	33039413
chr17	33042258	33044491
chr17	33045797	33046850
chr17	33048511	33051666
chr17	33054072	33056725
chr17	33152926	33153525
chr17	33326064	33327158
chr17	33333337	33334797
chr17	33351299	33352650
chr17	33655038	33655515
chr17	34222205	34222992
chr17	34363470	34364326
chr17	34372701	34374404
chr17	34538983	34540106
chr17	34608631	34609979
chr17	34630651	34631641
chr17	34931110	34932118
chr17	35141064	35141840
chr17	35290685	35291680
chr17	35339542	35340760
chr17	35341244	35342324
chr17	35343754	35344577
chr17	35380648	35384466
chr17	35618222	35619789
chr17	35620677	35621885
chr17	36017568	36019018
chr17	36008721	36010542
chr17	35985731	35988461
chr17	35978967	35980493
chr17	35960270	35961300
chr17	35946498	35948688
chr17	35924135	35924861
chr17	35920712	35922086
chr17	35891270	35892752
chr17	35820988	35822172
chr17	35778883	35779610
chr17	37131873	37134072
chr17	37188633	37189857
chr17	37438390	37439582
chr17	37516844	37517851
chr17	37865206	37866264
chr17	37870493	37871126
chr17	37879436	37881198
chr17	37888628	37890329
chr17	37892361	37893759
chr17	37913252	37914435
chr17	37916725	37918400
chr17	37921263	37922992
chr17	37924183	37926844
chr17	37927219	37930534
chr17	37932540	37934669
chr17	37934863	37937495
chr17	37937983	37939654
chr17	37940439	37942089
chr17	37969082	37969945
chr17	38039404	38040700
chr17	38042101	38043494
chr17	38058017	38059259
chr17	38111564	38113294
chr17	38336692	38338252
chr17	38466590	38467815
chr17	38858732	38861019
chr17	39796071	39796838
chr17	43784858	43785412
chr17	42331570	42332731
chr17	42334321	42335791
chr17	42344939	42346957
chr17	42359653	42360929
chr17	43862828	43865303
chr17	43997868	43998478
chr17	44303422	44304086
chr17	44305272	44306854
chr17	44317271	44319179
chr17	44375101	44375742
chr17	44395310	44396655
chr17	44396738	44397294
chr17	44399113	44399642
[truncated: 3,332 more rows]

## Sheet: Table_S24
DARs_80%epi_24hpf_Zv9
chr10	22125464	22126703
chr8	45753756	45756756
chr23	1187272	1187806
chr25	33924708	33925276
chr13	5835817	5836930
chr21	689545	690478
chr21	705588	706066
Zv9_NA322	79171	80113
chr23	37043713	37044399
chr23	37074195	37075957
chr20	50110932	50111567
chr7	60044870	60045667
chr22	38759635	38760588
chr13	46896974	46897554
chr13	46887899	46888764
chr11	40684816	40685894
chr11	40676107	40676830
chr12	3789171	3790163
chr10	17305452	17306771
chr11	44305264	44306088
chr1	52071635	52071990
chr7	29245463	29246594
chr21	39976952	39977557
chr24	35560808	35561927
chr24	35562895	35563509
chr24	35594329	35595092
chr24	35609700	35610988
chr24	35614484	35616121
chr24	35617344	35618092
chr17	9536210	9537560
chr8	36362627	36363825
chr18	49514366	49514779
chr18	49477933	49478396
chr5	59703204	59704216
chr20	45217626	45218676
chr18	1713297	1713915
chr18	1736909	1738115
chr14	3753353	3753798
chr11	10320556	10322134
chr15	45368128	45369225
chr8	1413757	1414157
chr25	4523463	4524073
chr25	1883077	1883493
chr25	1883703	1884244
chr3	48755230	48756913
chr21	43201701	43202215
Zv9_NA181	7628	8037
chr7	40762398	40762877
Zv9_NA550	2110	4128
chr8	50581487	50582718
Zv9_scaffold3500	52164	53879
chr3	61045593	61046934
chr1	4879146	4879703
chr16	55381354	55382273
chr15	6203767	6204868
chr15	45313903	45314718
chr15	45314981	45316008
chr15	45025731	45025955
chr15	45023268	45025232
chr15	44112840	44114029
chr4	4555046	4556292
chr12	45464968	45465865
chr12	45431127	45431931
chr12	45427888	45428703
Zv9_NA48	145638	146407
chr2	41429571	41431448
chr2	41424926	41425977
chr2	41422009	41424391
chr2	41417962	41421764
chr12	50526590	50527012
chr2	20297735	20298734
Zv9_NA101	5708	6175
Zv9_scaffold3497	26737	27096
chr15	42209695	42212036
chr16	55209691	55210865
chr3	61251832	61252339
chr6	55684020	55684454
Zv9_NA372	194982	196357
chr5	18986220	18986964
Zv9_NA718	1953	2391
chr10	42925080	42925645
chr23	41268831	41269770
chr23	41265718	41266476
chr23	701848	703321
chr18	9362128	9363060
chr22	38550455	38551239
chr14	48207940	48208516
chr12	45016910	45017588
chr8	29424370	29425020
chr22	15211437	15211903
chr22	15209718	15210869
chr22	15204515	15204911
chr16	55910053	55911803
chr16	55912865	55913618
chr24	26595784	26598443
chr17	52487391	52488504
chr9	50333058	50333711
chr18	39540577	39541429
chr18	39542183	39542510
chr22	5159121	5159498
chr22	20643198	20643589
Zv9_NA407	35750	36613
chr24	36419582	36420135
chr24	36681952	36682692
chr7	75356776	75358767
chr7	75352265	75352668
chr2	13699173	13700163
chr3	13504685	13505729
chr6	58993037	58993709
chr20	15026749	15027592
chr18	41410551	41411852
chr18	41462070	41464633
chr18	41485817	41488256
chr18	41489384	41490562
Zv9_scaffold3535	279862	280228
Zv9_NA859	8623	9775
chr7	11355140	11355514
chr18	2893995	2896032
chr15	3180125	3180593
chr19	4582509	4583353
chr20	4285561	4286806
chr20	4361224	4363145
chr9	4149841	4150601
chr7	68250368	68252470
chr10	12435537	12436237
chr10	12427906	12428726
chr2	16520572	16522593
chr3	31394582	31396048
chr17	13381831	13382803
chr18	31309955	31310868
chr14	17228864	17230050
chr16	8349975	8352283
chr3	6037202	6038478
chr11	44840104	44841198
chr7	44657122	44657682
chr3	10942833	10943427
chr3	10917132	10918171
Zv9_NA403	61232	62091
Zv9_NA403	49373	51223
Zv9_NA403	21465	22817
chr14	3868501	3868954
chr5	12445523	12446399
chr13	2780900	2781413
chr3	6311571	6312425
chr20	45820481	45821877
chr16	55981301	55982745
chr18	33263251	33263845
chr21	3083639	3084487
chr21	3065097	3065697
chr13	40035449	40035923
chr4	59102639	59104286
chr7	73247575	73249000
chr7	73250219	73251028
chr7	73260424	73261629
chr9	8822427	8822944
chr9	8756249	8756763
chr18	43583757	43584202
chr8	2162450	2163107
chr21	3510463	3511204
Zv9_NA815	16687	20724
chr22	34328611	34328975
chr12	44915116	44917980
chr20	45551728	45552590
chr2	58057863	58058584
chr6	53520070	53521611
chr17	42784242	42784908
chr14	27349373	27350840
chr23	2674224	2676655
chr7	9991793	9992770
chr20	51097872	51098192
chr24	37563255	37564229
chr5	62764203	62764876
chr18	9379984	9381201
chr10	3698292	3699072
chr10	3693625	3694221
chr14	48012326	48012790
chr16	937788	940107
chr12	8783769	8785386
Zv9_NA310	5709	6253
chr20	4586661	4587809
chr20	4488888	4489581
chr20	4485312	4488398
chr20	4477679	4478216
Zv9_NA689	8336	9099
chr12	1083472	1084211
chr18	32147475	32148248
chr2	47395227	47397801
Zv9_scaffold3551	44892	45621
chr8	39096927	39097727
chr20	19701738	19702163
chr8	52222049	52222500
chr8	52903655	52904481
Zv9_scaffold3512	38729	41002
Zv9_scaffold3512	57846	59291
Zv9_scaffold3512	60128	62401
Zv9_scaffold3485	105893	106274
chr3	4360794	4361761
chr2	54368194	54369091
chr20	53986601	53988870
chr16	9302567	9304517
chr15	6468654	6469378
chr13	9544841	9545896
Zv9_scaffold3495	232537	234896
Zv9_scaffold3495	238324	239355
chr17	42206956	42208947
chr17	42005374	42005740
chr17	41700863	41701886
chr17	41667630	41668781
chr17	41649693	41654251
chr17	41645852	41647155
chr17	41644324	41645611
chr17	41631597	41633776
chr17	41629080	41629990
chr17	41625234	41626831
chr17	41613161	41615637
Zv9_scaffold3492	212940	214324
Zv9_scaffold3492	210769	211224
Zv9_scaffold3492	162123	163518
Zv9_scaffold3492	153650	154289
Zv9_scaffold3492	140774	142082
Zv9_scaffold3492	132363	133420
Zv9_scaffold3492	126940	128046
Zv9_scaffold3492	76884	77586
chr20	44610589	44612273
Zv9_scaffold3471	15399	16742
chr11	24754837	24756105
chr11	24653052	24654769
Zv9_scaffold3551	57449	58250
chr2	25063487	25064545
chr2	25073406	25074016
chr2	25079862	25081560
chr2	25221318	25221857
chr2	25243693	25244717
chr2	25251460	25252095
chr2	25262619	25263817
chr2	25306322	25306783
chr2	25311468	25313236
chr9	27974081	27976396
Zv9_scaffold3529	16352	16866
chr13	53406940	53407986
Zv9_scaffold3563	207905	208849
Zv9_scaffold3563	224735	225277
chr18	3628883	3630084
Zv9_scaffold3540	244813	245213
chr5	4943097	4943707
chr5	4816626	4817724
chr6	44729572	44729962
chr16	32501029	32501877
chr16	32420774	32423925
chr11	8449472	8450800
chr11	8414987	8415950
chr20	49933021	49933564
chr20	49813686	49813968
Zv9_scaffold3500	243215	243879
chr20	49797638	49798154
chr9	53074044	53075682
chr16	46679084	46680625
chr17	36490528	36491693
chr17	36485098	36486507
chr17	36411999	36412526
chr17	36398774	36400449
chr17	36360760	36361746
chr23	5362536	5363188
chr23	5577730	5578997
chr23	5584815	5586226
chr23	5589350	5590515
chr9	4816143	4816679
chr1	184675	185512
chr1	929057	929577
chr1	1876782	1878334
chr1	1882820	1884187
chr1	1899799	1900923
chr1	3286369	3286991
chr1	4111296	4111829
chr1	4682980	4684274
chr1	5270858	5272973
chr1	5328806	5329970
chr1	6516296	6516851
chr3	12843769	12844600
chr1	8444808	8445843
chr1	8499201	8500869
chr1	8508480	8509814
chr1	5006142	5009584
chr1	5011653	5012983
chr1	10611722	10612624
chr1	11017304	11018147
chr1	11185878	11186993
chr24	37117600	37118521
chr1	4605211	4606247
chr1	11699430	11700302
chr1	12393655	12394704
chr1	14013089	14013625
chr1	14046283	14048303
chr1	14516112	14517039
chr1	14643324	14644279
chr1	14767199	14768209
chr1	14682426	14683191
chr1	14885579	14886250
chr1	15034652	15035197
chr1	15179994	15180741
chr1	15186690	15188245
chr1	15490233	15490752
chr1	15586873	15587931
chr1	15836982	15837515
chr1	16043332	16043859
chr1	16053254	16054096
chr1	16058316	16060341
chr1	16227599	16229337
chr1	16231684	16232241
chr1	16315225	16317823
chr1	16426372	16427041
chr1	17060780	17061495
chr1	17428561	17429146
chr1	17743688	17744269
chr1	17744755	17745245
chr1	18151204	18152639
chr1	18360503	18361565
chr1	18404192	18406588
chr1	18421730	18424357
chr1	18453676	18454339
chr1	18693100	18694776
chr1	19598737	19600649
chr1	19609492	19610039
chr1	19617899	19620097
chr1	19962458	19963701
chr1	27889687	27891756
chr1	29167992	29169546
chr1	28836280	28841351
chr1	28830669	28832206
chr1	28824685	28827736
chr1	28821046	28824133
chr1	28815051	28820267
chr1	28813143	28814765
chr1	28810907	28812830
chr1	28653439	28654425
chr1	28122041	28123238
chr1	22809248	22810523
chr1	22991982	22992659
chr1	23007047	23010077
chr1	23417649	23418652
chr1	23522221	23523401
chr1	23709278	23710665
chr1	23728841	23731676
chr1	23751031	23751566
chr1	24378620	24379937
chr1	24762629	24763226
chr1	21703061	21703539
chr1	21863870	21864481
chr1	21864494	21865324
chr1	21887906	21889117
chr1	22151641	22152201
chr1	22605277	22606032
chr1	25237349	25241072
chr1	25792943	25796100
chr1	25816911	25817895
chr1	25841651	25844713
chr1	25846041	25851754
chr1	25925473	25925965
chr1	26106622	26107921
chr1	26121403	26122199
chr1	26846730	26847259
chr1	22709971	22710514
chr1	30365657	30367280
chr1	30326839	30328164
chr1	30324798	30326184
chr1	30312037	30312699
chr1	30246561	30247571
chr1	30132604	30134172
chr1	30913450	30914550
chr1	33022251	33022917
chr1	33762291	33763487
chr1	33967835	33968467
chr1	34098286	34099556
chr1	34103563	34104489
chr22	15238336	15239803
chr22	15232381	15233383
chr22	15231167	15232279
chr22	15229894	15230867
chr1	37114873	37116069
chr1	36066304	36067197
chr1	36063862	36065745
chr1	35918105	35919207
chr1	35823800	35824720
chr1	35617734	35618694
chr1	35588391	35588976
chr1	35518468	35518960
chr1	35437558	35438322
chr1	35410614	35411705
chr1	35396188	35396688
chr1	35380605	35381243
chr1	35364239	35365341
chr1	35350133	35352216
chr1	35348992	35350048
chr1	35338708	35341184
chr1	35338043	35338553
chr1	35282354	35283137
chr1	35269081	35269651
chr1	34643506	34644236
chr1	38495362	38496147
chr1	40754312	40755615
chr1	40710287	40711179
chr1	40699845	40701590
chr1	40692493	40693772
chr1	40463741	40464919
chr1	40285921	40286732
chr1	40249960	40253408
chr1	40234023	40236153
chr1	39863616	39864489
chr1	39794895	39797433
chr1	39704386	39706210
chr1	39443164	39443650
chr1	44988010	44988506
chr1	45973380	45974732
chr1	46245318	46246380
chr1	45469355	45471126
chr1	42080297	42081963
chr1	42561048	42561620
chr1	42610834	42611393
chr1	42631624	42632234
chr1	42912474	42915405
chr1	43071609	43072289
chr1	43959190	43960961
chr1	44182776	44187169
chr1	44394598	44396899
chr1	46544868	46545366
chr1	46549553	46550193
chr1	46550483	46551139
chr1	46605412	46606127
chr1	46659489	46660437
chr1	47771548	47772467
chr1	47776276	47776802
chr1	47795580	47796498
chr1	47850525	47851428
chr1	47964006	47965064
chr1	47959871	47960875
chr1	48137200	48137761
chr1	48206360	48207146
chr1	48218385	48219529
chr1	48223636	48224133
chr1	48243144	48244090
chr1	49837346	49839910
chr1	49833790	49835817
chr1	49828963	49829496
chr1	49812245	49813260
chr17	10730183	10731257
chr17	10773092	10774885
chr17	10782763	10784876
chr17	10796713	10799130
chr17	10799615	10801922
chr1	50325974	50326865
chr1	50331358	50333274
chr1	50362361	50363348
chr1	50519567	50520215
chr1	51155958	51157266
chr1	51377505	51378730
chr1	51393201	51394293
chr1	51394419	51395400
chr1	51403058	51405110
chr1	52021722	52023015
chr1	52007540	52009331
chr1	52191258	52192385
chr1	52393675	52394781
chr1	53479415	53480064
chr1	53542863	53543602
chr1	54911619	54912189
chr1	55715835	55716643
chr1	55388608	55389952
chr1	55280580	55283441
chr1	55203405	55204535
chr1	55794191	55794614
chr1	53091219	53091849
chr1	57273909	57275353
chr1	57265558	57266655
chr1	57263384	57263982
chr1	59948021	59948601
chr10	202729	203545
chr10	159158	159586
chr10	267322	267786
chr10	856991	857410
chr10	1145429	1147498
chr10	1154066	1156062
chr10	1254373	1255018
chr10	1273811	1274545
chr10	1964939	1965584
chr10	1905333	1907129
chr10	1502224	1503208
chr10	1783195	1783677
chr10	1835520	1836977
chr10	2977050	2977945
chr10	4195049	4195995
chr10	4276666	4277453
chr10	4611514	4612118
chr10	4681352	4682680
chr10	4691629	4692335
chr10	4708347	4709036
chr10	4786452	4787265
chr10	4907612	4908213
chr10	5464581	5466367
chr10	5477933	5479093
chr10	5486480	5487121
chr10	5489287	5490264
chr10	5503002	5503775
chr10	8630129	8631460
chr10	8447308	8448878
chr10	8289006	8289567
chr10	7856702	7857318
chr10	7380595	7381868
chr10	7355381	7357474
chr10	7134144	7135151
chr10	8799495	8800204
chr10	8805090	8805759
chr10	15496527	15497495
chr10	16142308	16143865
chr10	16201068	16202408
chr10	13288816	13289543
chr10	13162967	13163522
chr10	13511403	13512715
chr10	13514589	13515172
chr10	13743728	13745575
chr10	14417782	14418507
chr10	14419900	14422728
chr10	14427229	14427709
chr10	11650759	11652428
chr10	11641064	11641610
chr10	11513921	11514554
chr10	11485010	11487124
chr10	11419373	11421732
chr10	11396628	11397559
chr10	10994720	10995354
chr10	10984832	10985354
chr10	10981856	10983730
chr10	10306604	10307394
chr10	10305176	10306196
chr10	10288943	10290579
chr10	18987443	18987992
chr10	18232550	18233935
chr10	18229132	18232311
chr10	18221918	18223131
chr10	17675358	17676194
chr10	17426990	17430819
chr10	22831638	22832407
chr10	22813252	22814104
chr10	22261875	22265266
chr10	22259497	22259847
chr10	22230859	22231799
chr10	21719585	21720127
chr10	21216378	21217071
chr10	21171974	21172621
chr10	21118437	21119279
chr10	20999100	21000304
chr10	20818417	20819343
chr10	20478829	20480605
chr10	20229944	20230912
chr25	2459847	2461104
chr25	2453641	2454906
chr10	25986189	25986950
chr10	26227726	26228614
chr10	26268502	26269450
chr10	26311659	26312244
chr10	26317222	26317852
chr10	26320410	26321745
chr10	26325890	26326553
chr10	26533794	26538235
chr10	26664954	26668731
chr10	26671784	26672445
chr10	26673778	26675996
chr10	26716637	26719461
chr10	26730124	26731185
chr10	26964951	26965612
chr10	26968245	26969572
chr10	27012288	27013044
chr10	27031140	27031691
chr10	27047945	27049476
chr10	27092247	27092797
chr10	27590352	27591786
chr10	27709771	27711299
chr10	27946786	27947909
chr10	27949166	27949519
chr10	27998334	28000197
chr10	28043064	28047123
chr10	28149597	28151366
chr10	28152386	28153233
chr10	28154936	28156396
chr10	28218216	28218748
chr10	28228309	28228968
chr10	28391143	28391965
chr19	6439974	6441327
chr10	23494441	23496144
chr10	23513761	23515145
chr10	23562431	23562948
chr10	23722198	23724333
chr10	23724835	23726709
chr10	24617040	24619304
chr10	24947102	24948772
chr10	24979358	24981180
chr10	25014397	25015823
chr10	25103681	25104376
chr10	28892150	28893814
chr10	28900842	28903315
chr10	28942598	28943107
chr10	29216339	29217991
chr10	29274055	29275130
chr10	29276157	29276955
chr10	29289602	29290892
chr10	30718352	30720278
chr10	30847375	30849130
chr10	30849834	30851010
chr10	31272998	31273853
chr10	31543778	31545075
chr10	31613688	31615111
chr10	31708113	31708710
chr10	31938349	31939021
chr10	32061728	32062780
chr10	32063584	32065235
chr10	32417118	32418814
chr10	32419064	32421378
chr10	32432840	32433431
chr10	32437054	32440243
chr10	32481176	32482270
chr10	32573905	32575032
chr10	32768382	32769242
chr10	32928147	32930206
chr10	32931498	32932710
chr10	32941476	32943025
chr10	32984629	32985517
chr10	33089913	33091394
chr10	33133279	33133811
chr10	33230914	33231446
chr10	33262392	33263473
chr10	33276778	33277789
chr10	33339902	33340568
chr10	33342381	33343102
chr10	33363662	33364252
chr10	33382359	33384141
chr10	33902424	33903364
chr10	34020424	34021309
chr10	34016439	34017600
chr10	34013846	34015044
chr10	33964321	33964869
chr10	33955970	33957492
chr10	33953835	33954709
chr10	35001991	35005112
chr10	35293108	35294275
chr10	35334530	35335564
chr10	36011440	36012005
chr10	36161055	36161573
chr10	36213822	36214870
chr10	36407726	36408461
chr10	36408831	36409318
chr10	37287384	37288165
chr10	37307520	37308561
chr10	37312119	37313373
chr10	37544085	37544631
chr10	37800376	37801558
chr10	38377883	38380430
chr10	38425686	38427368
chr10	39043357	39044370
chr10	39045367	39047059
chr10	39502684	39503391
chr10	39593778	39595031
chr10	42271166	42271702
chr10	43712581	43714617
chr10	43706827	43709145
chr10	44766984	44767999
chr10	45146262	45147217
chr10	45293600	45294629
chr10	45290166	45292216
chr10	46067016	46068534
chr10	46080521	46081651
chr10	46187058	46187628
chr10	46382236	46382829
chr10	46381371	46382130
chr10	45419029	45419543
chr10	45809672	45811787
chr10	45891174	45892075
chr11	205595	207158
chr11	434527	435596
chr11	320620	321381
chr11	290481	291108
chr11	1505267	1506669
chr11	1403327	1403874
chr11	1111389	1111937
chr11	2698645	2699314
chr11	2668747	2669934
chr11	3592369	3593403
chr11	3820102	3821751
chr11	3930602	3933461
chr11	3934070	3935505
chr11	5092523	5093008
chr11	5490240	5490849
chr11	5507965	5508630
chr11	5510364	5510949
chr11	5813694	5815364
chr11	6060278	6060824
chr11	6663295	6664761
chr11	6808673	6809930
chr11	6993459	6995396
chr11	11238428	11239523
chr11	8212514	8214126
chr11	8186858	8188089
chr11	8144524	8145533
chr11	7753254	7755659
chr11	7751053	7752997
chr11	7747766	7749245
chr11	7745430	7747171
chr11	7736412	7740567
chr11	7672639	7673052
chr11	7635163	7636833
chr11	7616144	7617041
chr11	7521281	7521941
chr11	7316612	7318204
chr11	7219513	7221552
chr11	7207333	7209915
chr11	7152149	7152789
chr11	7150333	7152098
chr11	7148756	7149860
chr11	8704447	8705073
chr11	8509852	8510881
chr11	10941748	10942859
chr11	11043541	11044145
chr11	9820371	9821691
chr11	12062026	12063512
chr11	11284965	11285572
chr11	13300369	13301044
chr11	13720690	13721118
chr11	13722328	13723104
chr11	13724653	13725425
chr11	13736748	13739124
chr11	13753019	13754745
chr11	14024710	14026087
chr11	14444163	14445182
chr11	14765209	14766902
chr11	14791552	14792936
chr11	17004109	17005074
chr11	18019316	18021413
chr11	18007950	18009264
chr11	16881659	16882218
chr11	16880932	16881554
chr11	16826497	16827083
chr11	16751470	16753318
chr11	16722938	16724502
chr11	16703159	16704202
chr11	16692676	16693253
chr11	16689944	16691018
chr11	16666328	16667682
chr11	16644971	16645882
chr11	16629086	16630186
chr11	18630429	18631024
chr11	18776559	18777093
chr11	19056630	19060638
chr11	19416773	19421109
chr11	24388745	24389973
chr11	24368638	24369361
chr11	23949589	23950132
chr11	23441744	23442912
chr11	23438849	23440106
chr11	23284434	23285011
chr11	23190317	23191486
chr11	23092296	23092776
chr11	23001187	23001988
chr11	22967764	22968760
chr11	22917260	22919099
chr11	22880690	22881704
chr11	22832397	22833394
chr11	22822565	22822995
chr11	22817273	22819198
chr11	22812763	22816617
chr11	22810864	22812694
chr11	22806951	22808805
chr11	22805114	22806919
chr11	22791604	22794220
chr11	22789448	22790043
chr11	22786844	22787326
chr11	22762409	22763014
chr11	22704389	22705558
chr11	22701989	22702420
chr11	22698500	22698998
chr11	22487502	22489446
chr11	22480340	22483239
chr11	22455081	22455588
chr11	22368437	22369334
chr11	22301488	22302157
chr11	22123714	22124337
chr11	22062614	22063478
chr11	25042112	25042928
chr11	25536047	25536946
chr11	25642538	25643230
chr11	26307328	26307898
chr11	26356348	26357377
chr11	27285053	27286880
chr11	27578571	27579147
chr11	27579159	27579557
chr11	27582617	27584196
chr11	27587349	27588046
chr11	27590227	27591326
chr11	27680409	27681202
chr11	27713001	27713455
chr11	27785408	27786712
chr11	27949037	27949529
chr11	28360857	28362407
chr11	28364563	28367053
chr11	28499503	28500250
chr11	28643804	28644481
chr11	28799775	28800258
chr11	28921313	28922003
chr11	29115979	29117685
chr11	29134410	29135363
chr11	29146080	29147700
chr11	29197933	29198370
chr11	29284370	29285750
chr11	29314384	29315378
chr11	29611277	29612291
chr11	29769737	29771377
chr11	29777140	29778134
chr11	30223991	30224823
chr11	30332478	30333289
chr11	30380892	30383103
chr11	30677305	30677997
chr11	30697619	30700131
chr11	30705263	30706797
chr11	32388940	32390633
chr11	32352729	32353904
chr11	32291146	32292920
chr11	32246009	32246598
chr11	31878771	31879179
chr11	31871148	31872595
chr11	31808052	31808482
chr11	31002700	31005893
chr11	30995681	30996814
chr11	32745709	32746641
chr11	32551610	32552598
chr11	33016134	33017596
chr11	34124298	34124800
chr11	34195062	34196015
chr11	34650348	34651866
chr11	35605014	35605604
chr11	35598714	35600242
chr11	36387332	36388386
chr11	36390809	36392264
chr11	36444150	36446176
chr11	36558851	36560262
chr11	36636079	36639272
chr11	36653993	36655001
chr11	36700168	36700861
chr11	36728151	36729193
chr11	36731929	36732635
chr11	37608666	37609944
chr11	37757816	37758523
chr11	40283486	40284261
chr11	40301560	40303780
chr11	40452179	40452719
chr11	41515428	41516746
chr11	41595680	41596599
chr11	42240788	42241259
chr11	42262111	42262851
chr11	42262999	42263562
chr11	43436790	43437491
chr11	45227226	45229058
chr11	45577383	45578475
chr11	45583308	45584323
chr11	45586581	45586994
chr11	45605051	45605932
chr11	45622055	45622559
chr11	46527132	46528757
chr24	40553482	40554554
chr12	828992	830236
chr12	910819	912026
chr12	951426	951942
chr12	2127749	2128558
chr12	1073768	1075106
chr12	1918495	1919146
chr12	3748152	3748681
chr12	3740670	3741231
chr12	3685455	3686006
chr12	3312284	3313105
chr12	3281248	3281771
chr12	3276442	3277547
chr12	4237952	4238502
chr12	4538140	4539290
chr12	5197092	5197566
chr12	7083131	7084461
chr12	6620607	6622110
chr12	6471844	6473213
chr12	7793017	7794007
chr12	7794510	7795115
chr12	8499069	8499578
chr12	8427632	8428600
chr12	9122685	9123266
chr12	9142305	9143855
chr12	9209575	9211064
chr12	9393684	9395434
chr12	9402387	9403712
chr12	9418581	9419459
chr12	9475223	9476783
chr12	9477692	9479098
chr12	9483108	9484232
chr12	9486615	9487645
chr12	9511391	9512406
chr12	9599337	9600762
chr12	9663076	9664493
chr12	9668677	9670561
chr12	9675121	9677146
chr12	9677480	9679109
chr12	9730632	9731231
chr12	9764709	9765860
chr12	9767138	9768810
chr12	9779519	9782170
chr12	9784205	9785679
chr12	9789634	9791929
chr12	10118703	10119461
chr12	10225433	10226083
chr12	11602606	11605094
chr12	11625513	11626002
chr12	11785803	11786332
chr12	11721608	11722540
chr12	12041625	12042522
chr12	12124587	12125179
chr12	12136340	12137007
chr12	12140166	12142264
chr12	12151164	12151653
chr12	15030344	15031426
chr12	15022208	15023133
chr12	14912308	14913766
chr12	14574298	14574962
chr12	18663972	18664910
chr12	18512305	18513364
chr12	18444701	18445382
chr12	18432285	18432801
chr12	18420316	18421169
chr12	18374329	18375454
chr12	17040779	17042018
chr12	17374884	17377677
chr12	20010221	20011264
chr12	20217681	20220600
chr12	20363757	20364324
chr12	20369577	20370338
chr12	21550171	21552309
chr12	29597396	29597863
chr12	28929095	28929756
chr12	28917540	28919264
chr12	28739434	28740774
chr12	28733001	28735465
chr12	28575996	28577662
chr12	28455224	28458397
chr12	28369497	28370155
chr12	28366131	28368049
chr12	28364271	28365048
chr12	28277309	28278100
chr12	28095610	28095960
chr12	28068117	28068985
chr12	28047470	28048770
chr12	28045358	28045893
chr12	27622731	27623482
chr12	27387595	27388537
chr12	27333169	27334472
chr12	27275686	27276128
chr12	27228071	27228922
chr12	27125380	27125964
chr12	26942382	26943058
chr12	26886126	26887706
chr12	26884836	26885422
chr12	26875329	26876858
chr12	26872448	26873883
chr12	26867736	26868724
chr12	26862839	26864959
chr12	26844384	26847569
chr12	26833636	26834497
chr12	26828919	26830517
chr12	26759600	26761959
chr12	26758172	26759295
chr12	23298171	23299216
chr12	23308379	23308790
chr12	23311262	23314010
chr12	29888062	29889109
chr12	30014701	30016697
chr12	30018831	30020006
chr12	30578354	30580665
chr12	30591148	30591723
chr12	30824100	30825808
chr12	30862615	30863522
chr12	30920235	30921199
chr12	31415451	31417846
chr12	31850772	31851675
chr12	31923571	31924628
chr12	31947884	31948349
chr12	23795087	23795662
chr12	23894742	23895344
chr12	24130291	24131011
chr12	24184368	24185084
chr12	24699858	24700668
chr12	24785176	24785811
chr12	24858742	24861844
chr12	25116990	25117948
chr12	25121953	25123156
chr12	25209852	25210517
chr12	25304621	25305828
chr12	25318975	25320118
chr12	25779008	25779548
chr12	25934274	25936822
chr12	26327082	26328637
chr12	26421711	26423895
chr12	26511843	26512350
chr12	32333423	32334386
chr12	32673795	32677532
chr12	32712286	32713839
chr12	32958821	32959917
chr12	33032796	33033325
chr12	33048269	33049187
chr12	33081923	33082951
chr12	33087389	33088246
chr12	33089554	33090117
chr12	33091932	33092471
chr12	33422641	33423169
chr12	33901000	33901606
chr21	31954986	31956425
chr21	31956456	31957399
chr21	32019481	32021943
chr12	34538750	34540330
chr12	34517651	34518244
chr12	34878911	34882062
chr12	35017574	35018286
chr12	35435214	35436075
chr12	35451209	35452737
chr12	35488253	35489476
chr12	35491748	35492320
chr12	37040313	37041759
chr12	36640899	36642345
chr12	36379236	36380372
chr12	36279550	36280322
chr12	36089725	36090493
chr12	35839270	35840370
chr12	38143572	38144237
chr12	37967400	37968477
chr12	37540161	37542188
chr12	37517571	37518048
chr12	37458374	37458958
chr12	38211307	38211847
chr12	38239504	38242535
chr12	38426253	38426738
chr12	38518157	38521531
chr12	38859607	38860389
chr12	38911918	38912417
chr12	38913204	38913870
chr12	39541504	39542981
chr12	39578412	39579482
chr12	39592610	39593446
chr12	39996331	39997388
chr12	40148011	40148690
chr12	40275269	40276331
chr12	40285359	40285845
chr12	40955470	40957453
chr12	40744462	40745177
chr12	44164257	44164793
chr12	44183378	44185958
chr12	44275372	44275979
chr12	44287696	44288679
chr16	2324685	2325763
chr16	2312261	2313703
chr16	1645756	1646540
chr12	44045304	44046335
chr12	45628719	45630719
chr12	46737722	46738595
chr12	46676102	46677200
chr12	46588923	46590978
chr12	47992235	47993114
chr12	47922565	47923077
chr12	47843356	47844244
chr12	49867266	49867810
chr13	463734	465077
chr13	1071495	1072063
chr13	34343243	34344259
chr13	34353388	34355561
chr13	34360172	34362295
chr13	34575501	34576049
chr13	34638126	34638715
chr13	34851980	34852862
chr13	2112870	2113723
chr13	2094678	2095486
chr13	2881601	2882566
chr13	2859544	2860194
chr13	2848190	2848597
chr13	3063107	3064686
chr13	3244361	3244899
chr13	3442073	3444166
chr13	3457530	3458021
chr13	3547646	3548189
chr13	3566943	3567994
chr13	3639057	3640079
chr13	3775488	3776477
chr13	3997134	3997933
chr13	4074459	4076671
chr13	4215393	4215969
chr13	4292084	4292625
chr13	4463800	4464325
chr13	4612872	4614573
chr13	4818151	4818606
chr13	4834646	4835312
chr13	4842496	4842981
chr13	4853660	4854641
chr13	4858275	4858949
chr13	4860218	4861251
chr13	4989448	4989886
chr13	4991733	4992572
chr13	5019424	5020150
chr13	5047867	5049325
chr13	5152366	5154296
chr13	5304903	5305539
chr13	5502144	5502998
chr13	5589925	5590713
chr13	5853385	5854874
chr13	6280844	6281938
chr13	6264003	6266383
chr13	6466080	6466912
chr13	7447393	7448391
chr13	7552711	7554033
chr13	7556818	7557700
chr13	7560585	7562979
chr13	7565064	7566146
chr13	7581750	7582352
chr13	7649049	7649581
chr13	7871808	7872555
chr13	8012069	8013322
chr13	8699345	8701602
chr13	9346730	9348012
chr13	9669771	9670839
chr13	9705611	9706361
chr13	10165225	10167260
chr13	10604329	10605345
chr13	11095957	11096672
chr13	11184922	11186746
chr13	11247390	11248877
chr13	11572442	11573291
chr13	11609755	11610278
chr13	12912885	12914398
chr13	12935787	12936943
chr13	13054394	13054946
chr13	13323186	13324274
chr13	13319135	13319868
chr13	19542539	19543123
chr13	19865704	19867670
chr13	20111981	20112897
chr13	16553333	16554250
chr13	16594967	16597097
chr13	17060981	17062664
chr13	17096579	17097674
chr13	17371535	17373651
chr13	17397283	17398073
chr13	17542663	17544351
chr13	17986564	17987722
chr13	18182899	18183603
chr13	18321001	18322699
chr13	18623357	18624125
chr13	18903110	18903919
chr13	18908088	18910709
chr13	21442679	21443234
chr13	21458601	21461807
chr13	21466965	21468019
chr13	21484093	21485205
chr13	21901887	21904101
chr13	22082061	22083274
chr13	22104914	22105441
chr13	22162666	22163445
chr13	22326819	22327655
chr13	22396304	22396817
chr13	22624286	22624849
chr13	23219118	23219977
chr13	23469086	23470247
chr13	23609682	23611154
chr13	23956974	23957566
chr13	23960362	23961068
chr13	24750761	24752285
chr13	24764174	24764807
chr13	24834150	24834610
chr13	25045902	25046444
chr13	25119207	25119806
chr13	25185536	25186450
chr13	25353951	25355511
chr13	25386443	25387433
chr13	25393720	25395497
chr13	25607473	25608169
chr13	25950469	25951187
chr13	26099624	26100298
chr13	26137864	26139457
chr13	26164557	26165268
chr13	26266166	26267859
chr13	26278355	26278841
chr13	26376880	26377727
chr13	26590242	26591018
chr13	26594261	26595401
chr13	26602218	26602850
chr13	27121826	27124429
chr13	27139756	27141190
chr13	27141195	27142743
chr13	27143335	27145637
chr13	27145853	27146805
chr13	27485196	27485750
chr13	27980086	27980590
chr13	28000093	28001022
chr13	28015049	28015818
chr13	29377634	29378759
chr13	29809868	29811282
chr13	29982928	29984864
chr13	30092738	30095770
chr13	30209327	30210129
chr13	30489112	30490174
chr13	30555357	30556132
chr13	30562824	30564120
chr13	30672699	30673313
chr13	30825013	30826273
chr13	30843027	30844566
chr13	30847790	30848690
chr13	31165974	31166430
chr13	31169449	31170351
chr13	31183509	31184809
chr13	31225306	31226907
chr13	31554774	31555438
chr13	31704778	31705275
chr13	31901436	31902155
chr13	31935935	31936826
chr13	32211679	32212135
chr13	32395681	32397584
chr13	32409701	32411279
chr13	32411427	32412349
chr13	32416664	32418770
chr13	32419475	32420421
chr13	32422849	32423705
chr13	32434667	32435497
chr13	32441219	32442515
chr13	32445670	32447295
chr13	32447344	32449715
chr13	32663909	32664992
chr13	32913467	32914103
chr13	32918672	32919884
chr13	33072859	33073533
chr13	33187389	33188511
chr13	33203312	33203808
chr13	33232922	33234189
chr13	29243438	29244753
chr13	28796972	28799074
chr13	28795637	28796133
chr13	28751317	28753497
chr13	28748342	28750098
chr13	28745324	28746942
chr13	28709651	28711431
chr13	28692804	28694375
chr13	28690608	28692688
chr13	28681952	28684762
chr13	28679377	28681650
chr13	28675476	28676334
chr13	28664733	28665481
chr13	28548368	28550072
chr13	28297736	28298380
chr13	35099329	35100199
chr13	35158595	35159919
chr13	35428265	35428939
chr13	35393577	35395284
chr13	35378267	35379569
chr13	34185746	34186321
chr13	34183029	34184085
chr13	34182500	34182956
chr13	34173864	34175605
chr13	34080757	34081376
chr13	35479593	35480189
chr13	35484217	35484955
chr13	35492392	35493363
chr13	35495935	35496539
chr13	36405633	36408010
chr13	36759358	36760525
chr13	36875120	36876720
chr13	37100166	37100928
chr13	37147513	37148076
chr13	37376251	37377852
chr13	37588300	37589660
chr13	37607683	37608697
chr13	37651467	37651902
chr13	38146449	38147691
chr13	38351323	38352938
chr13	38675668	38677417
chr13	38686689	38687595
chr13	39449999	39450693
chr13	39506580	39508333
chr13	39896460	39897345
chr13	40493330	40494410
chr13	40782602	40783454
chr13	41139061	41140159
chr13	41232909	41233499
chr13	41410934	41411676
chr13	41814804	41815964
chr13	41817879	41818863
chr13	41818933	41819896
chr13	41980287	41981700
chr13	42637365	42640158
chr13	43665566	43668128
chr13	43320775	43321589
chr13	43085787	43086385
chr13	43081518	43082873
chr13	43944029	43944590
chr13	44046936	44051318
chr13	44054272	44054951
chr13	44055997	44057215
chr13	44057875	44060222
chr13	44063986	44065809
chr13	44070009	44072079
chr13	44077222	44079954
chr13	45956889	45957604
chr13	45957658	45958476
chr13	46213273	46216205
chr13	46514090	46514789
chr13	46517747	46519578
chr13	46531211	46532092
chr13	45467505	45468968
chr13	46976477	46977823
chr13	46727760	46728751
chr13	46776187	46777036
chr13	47301558	47302400
chr13	47300034	47301137
chr13	47177750	47179604
chr13	47177203	47177731
chr13	48099907	48101272
chr13	49337796	49339857
chr13	49834260	49834905
chr13	49755302	49756755
chr13	50213090	50214092
chr13	50452053	50452796
chr13	53100067	53100543
chr13	51240188	51241191
chr13	51272523	51273321
chr13	54054351	54055127
chr14	410109	411167
chr14	401054	402208
chr14	334866	335567
chr14	42220	43048
chr14	815155	816031
Zv9_NA584	69195	70891
chr14	1761977	1763236
chr14	1764093	1765203
chr14	1779047	1779552
chr14	1779899	1781377
chr14	1956578	1957133
chr14	3204239	3205084
chr14	4553047	4554097
chr14	3481440	3482104
chr14	4899546	4900682
chr14	5004276	5004817
chr14	5020011	5020556
chr14	5047542	5048468
chr14	5852815	5854124
chr14	5937427	5940006
chr14	7050162	7051253
chr14	7053169	7054155
chr14	6941657	6943636
chr14	6961649	6962672
chr14	6642901	6643459
chr14	7101725	7104888
chr14	7105398	7108261
chr14	7255509	7256193
chr14	7929696	7930741
chr14	8091617	8093332
chr14	10775449	10776947
chr14	10788642	10789863
chr14	10801068	10803733
chr14	10846188	10850412
chr14	12852802	12855062
chr14	13000664	13001151
chr14	13060683	13061746
chr14	13293512	13296373
chr14	14124123	14125712
chr14	14163078	14164094
chr14	14165413	14166021
chr14	18182781	18184599
chr14	18451248	18452373
chr14	18581820	18582446
chr14	18682198	18683003
chr14	18694776	18697067
chr14	18697837	18699860
chr14	18710797	18711969
chr14	18730396	18732902
chr14	18998338	19000425
chr14	19871082	19871764
chr14	15527820	15528326
chr14	15515882	15516474
chr14	15323900	15324447
chr14	15088020	15090413
chr14	14634711	14636101
chr14	14401023	14402004
chr14	14430230	14430707
chr14	16728652	16729993
chr14	16792592	16796081
chr14	16838288	16839307
chr14	20247942	20249184
chr14	20306857	20307986
chr14	20611998	20612568
chr14	21009341	21010039
chr14	21533312	21533866
chr14	21840592	21841202
chr14	21848296	21849478
chr14	22059806	22060762
chr14	22375446	22376006
chr14	22601863	22602571
chr14	22609813	22610873
chr14	22614822	22615916
chr14	22713293	22714909
chr14	22859712	22862067
chr14	22979704	22981495
chr14	23456911	23457554
chr14	23655558	23656204
chr14	24132003	24132971
chr14	24214279	24215790
chr14	24319366	24319971
chr14	24390249	24392033
chr14	24465898	24466981
chr14	24528436	24530326
chr14	24573525	24575513
chr14	24813186	24813764
chr14	25287478	25288999
chr14	25290923	25291607
chr14	25336686	25337590
chr14	25413639	25414518
chr14	25648341	25649507
chr14	25662779	25664489
chr14	25664795	25667389
chr14	25686111	25687240
chr14	25734366	25735378
chr14	25835320	25837201
chr14	25837222	25837831
chr14	25915856	25916595
chr14	25919508	25921509
chr14	26166484	26167178
chr14	26360233	26360826
chr14	26363463	26364527
chr14	26418954	26422103
chr14	26505261	26506758
chr14	26506970	26507549
chr14	26557681	26560657
chr14	26801002	26802306
chr14	26888819	26890657
chr14	26897037	26898176
chr14	26899638	26906270
chr14	26908253	26908994
chr14	27040514	27042682
chr14	50820667	50821475
chr14	27459308	27460783
chr14	27753705	27754239
chr14	28197517	28198223
chr14	28899311	28900692
chr14	28902091	28903594
chr14	28922323	28925398
chr14	28927809	28931047
chr14	28931899	28933090
chr14	28934051	28934781
chr14	29587850	29588404
chr14	29593611	29594616
chr14	29600265	29601978
chr14	30169850	30170731
chr14	30721480	30722886
chr14	30746146	30746630
chr14	31557991	31558900
chr14	31560941	31562222
chr14	31734939	31736275
chr14	31741354	31742564
chr14	31787738	31788750
chr14	31869892	31872775
chr14	31972189	31972835
chr14	32042991	32044693
chr14	32045966	32048201
chr14	32482313	32483450
chr14	32765617	32766277
chr14	32784276	32786702
chr14	32791603	32792357
chr14	32796856	32800399
chr14	33027133	33030575
chr14	33223308	33224703
chr14	33419765	33420569
chr14	33855601	33858421
chr14	33853628	33854909
chr14	33846396	33850424
chr14	33794071	33797445
chr14	33735389	33736138
chr14	34224809	34226453
chr14	34749932	34750372
chr14	34789037	34789810
chr14	35947305	35948388
chr14	35859431	35860806
chr14	35830929	35832216
chr14	35756437	35757286
chr14	35700842	35701673
chr14	35662537	35663344
chr14	35658308	35661043
chr14	35638389	35639319
chr14	35629232	35632510
chr14	36241832	36242439
chr14	36482911	36483893
chr14	36688940	36689486
chr14	36839416	36840127
chr14	36869064	36869588
chr14	36983433	36984177
chr14	37166906	37167579
chr14	37181033	37181562
chr14	37382770	37383265
chr14	37492565	37493381
chr14	37593662	37595007
chr14	38283619	38284415
chr14	38297134	38298028
chr14	29350213	29350824
chr14	38807854	38809143
chr14	38834337	38834861
chr14	38839077	38840136
chr14	38873600	38875804
chr14	38905355	38907939
chr14	38908625	38909719
chr14	38910020	38913473
chr14	38914660	38917181
chr14	38920107	38921587
chr14	38934912	38935734
chr14	38938205	38940532
chr14	38941196	38941932
chr14	39047934	39048561
chr14	39371209	39372348
chr14	39551113	39552077
chr14	39999937	40001129
Zv9_NA274	47130	48753
Zv9_NA274	33338	35708
chr14	38425171	38427630
chr14	40949744	40950320
chr14	40875196	40875809
chr14	40800883	40801387
chr14	40739315	40741479
chr14	40695028	40695644
chr14	40676098	40677211
chr14	40638439	40639685
chr14	41813436	41814328
chr14	43147730	43148316
chr14	44317766	44318875
chr14	44920321	44921411
chr14	44924527	44926535
chr14	44928187	44929099
chr14	44983724	44984853
chr14	45107952	45110055
chr14	45164866	45165670
chr14	45192684	45194075
chr14	45907977	45908872
chr14	48191454	48192033
chr14	48098044	48099167
chr14	48070308	48071728
chr14	48062259	48063298
chr14	48048338	48049340
chr14	48032253	48032834
chr14	48036065	48037237
chr14	49170676	49173598
chr14	50879845	50880804
chr14	50936443	50936984
chr14	50937459	50937955
chr14	50942686	50943888
chr14	52613011	52614378
Zv9_NA389	8107	8707
chr15	309257	311122
chr15	289237	289762
chr15	605383	606473
chr15	1151811	1152400
chr15	1389773	1390348
chr15	1400037	1400949
chr16	6029963	6030381
chr16	6050039	6050569
chr15	3433091	3433815
chr15	3437169	3437733
chr15	4243895	4244495
chr15	4359584	4360393
chr15	4378751	4380620
chr15	4538281	4540256
chr15	5695648	5697245
chr15	7019356	7020905
chr15	7034711	7035953
chr15	7036504	7038867
chr15	11815630	11816705
chr15	11996972	11998528
chr15	11929595	11932419
chr15	11912726	11914586
chr22	32099446	32100300
chr15	13293551	13294848
chr15	13369577	13371075
chr15	13372479	13374121
chr15	13376458	13377998
chr15	10772547	10773120
chr15	7512946	7513906
chr15	8282641	8283935
chr15	8324816	8325786
chr15	8424832	8425793
chr15	8526990	8528032
chr15	8788588	8789380
chr15	9016564	9017216
chr15	9090592	9091207
chr15	9278546	9279374
chr15	13651129	13652056
chr15	13576719	13577299
chr15	13567226	13568492
chr15	13528603	13529233
Zv9_scaffold3463	643281	644323
chr15	2500983	2502542
chr15	14619077	14620370
chr15	14669784	14671610
chr15	14759673	14760862
chr15	14822347	14823597
chr15	15010787	15012233
chr15	15270600	15272192
chr15	15281064	15283416
chr15	15703818	15705270
chr15	15720528	15721498
chr15	15929435	15929966
chr15	16128162	16130037
chr15	16165156	16166376
chr15	16166911	16170265
chr15	16519346	16520879
chr15	16621137	16623640
chr15	16626057	16629094
chr15	16993421	16994569
chr15	16995679	16997340
chr15	17010056	17010468
chr15	17025790	17026369
chr15	17227151	17228085
chr15	17384621	17385515
chr15	17522386	17522889
Zv9_NA344	18390	21151
chr15	17808402	17809395
chr15	18590780	18591414
chr15	18586788	18587668
chr15	19277971	19278800
chr15	19452550	19454925
chr15	19659297	19659803
chr15	19660652	19661510
chr15	19709285	19711239
chr15	19729738	19730274
chr15	19850100	19851080
chr15	20209289	20210444
chr15	20419108	20420724
chr15	20429573	20430066
chr15	20471199	20472433
chr15	20766986	20767699
chr15	20767894	20768502
chr15	21275342	21275946
chr15	21291208	21293148
chr15	21299142	21303061
chr15	21313567	21316034
chr15	21387017	21388754
chr15	21417800	21419615
chr15	22166921	22167603
chr15	22229283	22230440
chr15	22321463	22323298
chr15	22400406	22402096
chr15	22588142	22589221
chr15	22593482	22595211
chr15	22845512	22846760
chr15	22976217	22977877
chr15	23007800	23008325
chr15	23008392	23008936
chr15	23060350	23060879
chr15	23227369	23227949
chr15	23328924	23329558
chr15	23731847	23732873
chr15	23738197	23739968
chr15	23799296	23799910
chr15	23952604	23953778
chr15	23965986	23966514
chr15	23971810	23973440
chr15	24211573	24212579
chr15	24243138	24243740
chr15	24264172	24264736
chr15	24283402	24284262
chr15	24294992	24295521
chr15	24325028	24325857
chr15	24692619	24693294
chr15	24902522	24904940
chr15	24904952	24905409
chr15	24906379	24907626
chr15	24913080	24913671
chr15	24922703	24927195
chr15	25064593	25065468
chr15	25096635	25097363
chr15	25125735	25126423
chr15	26342223	26342707
chr15	26671596	26673561
chr15	27228194	27228776
chr15	27247219	27248406
chr15	27627336	27628678
chr15	27731817	27733033
chr15	27791687	27793139
chr15	27838068	27839594
chr15	27900765	27901354
chr15	27962677	27964805
chr15	29024850	29027767
chr15	29049653	29051317
chr15	29446612	29447672
chr15	29668240	29669674
chr15	29911775	29912291
chr15	30199405	30201734
chr15	30240857	30241290
chr15	30265973	30266417
chr15	30421239	30422221
chr15	30436509	30437476
chr15	31018391	31018972
chr15	31323051	31323529
chr15	31482144	31483009
chr15	31783143	31783773
chr15	31875998	31876735
chr15	32245684	32246200
chr15	32254505	32255574
chr15	32259521	32261585
chr15	32262777	32263476
chr15	32279904	32281068
chr15	32297170	32298045
chr15	32300289	32301111
chr15	32305810	32306517
chr15	32321423	32322824
chr15	32322835	32323748
chr15	32554561	32555857
chr15	32698499	32699020
chr15	32825767	32826667
chr15	32907626	32908441
chr15	32939929	32941314
chr15	32991633	32992201
chr15	33106908	33107747
chr15	33117882	33118836
chr15	33992538	33993031
chr15	34350394	34351209
chr15	34481141	34482260
chr15	34490720	34492134
chr15	26953526	26954082
chr15	34761142	34761620
chr15	34763334	34765438
chr15	34779119	34780119
chr15	34795735	34797087
chr15	34890592	34891762
chr15	35085548	35087091
chr15	35372842	35375365
chr15	37633994	37634865
chr15	37618785	37619544
chr15	37616407	37617758
chr15	37612405	37613335
chr15	37034531	37036138
chr15	37289684	37290579
chr15	38187577	38188448
chr15	38173638	38174394
chr15	38073327	38074297
chr15	38309224	38310182
chr15	38319100	38321671
chr15	38462688	38463320
chr15	38592753	38593350
chr15	38740930	38741476
chr15	39122256	39124409
chr15	39194395	39195560
chr15	39284462	39285353
chr15	39290059	39291625
chr15	39331626	39333197
chr15	39371130	39372484
chr15	40239980	40243599
chr15	40243657	40244388
chr15	40479508	40483091
chr15	40549278	40550390
chr15	40920550	40921572
chr15	40929356	40930217
Zv9_NA693	9358	10295
chr15	42269699	42270426
chr15	42395175	42395994
chr15	44423146	44423718
chr15	46177066	46178744
chr15	46181510	46183248
chr15	46673544	46674150
chr15	45895656	45896013
chr15	46422565	46424667
chr15	46426149	46426819
chr16	425158	426798
chr16	639242	640351
chr16	637743	639159
chr16	984673	985538
chr16	1167106	1167836
chr16	1299955	1301080
chr16	1302144	1302538
chr16	1304498	1305067
chr16	10009367	10011156
chr16	10011298	10012553
chr16	3486366	3487154
chr16	5109877	5110322
chr16	5316404	5317695
chr17	13593273	13594569
chr16	6360312	6360920
chr16	6360956	6361998
chr16	6524212	6524841
chr16	6524910	6525931
chr16	6526738	6527641
chr16	6599388	6600381
chr16	6615365	6615841
chr16	7197612	7199445
chr16	7290694	7291262
chr16	7310004	7310999
chr16	7608722	7609675
chr16	7804309	7808504
chr16	7820694	7822014
chr16	8035405	8035887
chr16	8670897	8672068
chr16	8722640	8724344
chr16	8736718	8738969
chr16	8802226	8804581
chr16	8805097	8805958
chr16	8870386	8871963
chr16	9381313	9382205
chr16	9392264	9393212
chr16	9680869	9682549
chr16	9939946	9941580
chr16	10529154	10530347
chr16	11456370	11457030
chr16	11505778	11506506
chr16	11681715	11682583
chr16	12119530	12120965
chr16	12121612	12122307
chr16	12208577	12209519
chr16	57834635	57835332
chr16	12690407	12691679
chr16	12792753	12794560
chr16	12799582	12800827
chr16	14527088	14527931
chr16	14935586	14936237
chr16	15054832	15056885
chr16	15152038	15152732
chr16	15166325	15167903
chr16	15235621	15236197
chr16	15298497	15298967
chr16	15339158	15340707
chr5	3937300	3938506
chr16	17014213	17015034
chr16	17015835	17016608
chr16	17018155	17018581
chr16	17074066	17074810
chr16	17079893	17080420
chr16	17453471	17454615
chr16	18474317	18474884
chr16	18765885	18766883
chr16	18767570	18768030
chr16	18817523	18818021
chr16	19283850	19284726
chr16	25110262	25112236
chr16	25103305	25105554
chr16	24469733	24470578
chr16	24359544	24360317
chr16	24359074	24359536
chr16	21577807	21578396
chr16	21942525	21943151
chr16	21956954	21959462
chr16	22089590	22090169
chr16	22724938	22725451
chr16	23002132	23002597
chr16	23002701	23003238
chr16	23007777	23008892
chr16	23022641	23024166
chr16	23138648	23139734
chr16	23150803	23152840
chr3	2771265	2773550
chr16	23981907	23982463
chr16	25367907	25371456
chr16	25387759	25388280
chr16	25480983	25482675
chr16	25505057	25506654
chr16	25800094	25801634
chr16	25847980	25849496
chr16	26246344	26246846
chr16	26400181	26402155
chr16	26583267	26584098
chr16	27101885	27102853
chr16	27140785	27141514
chr16	27518557	27519247
chr16	27739610	27740166
chr16	27949230	27949843
chr16	28350347	28354013
chr16	28365896	28366434
chr16	28373094	28373799
chr16	28472648	28473168
chr16	28487724	28488951
chr16	28546406	28547784
chr16	28764467	28765394
chr16	28830279	28830917
chr16	28920757	28921844
chr16	28974636	28975821
chr16	29102129	29102870
chr16	29265902	29266654
chr16	29294130	29294722
chr16	29508060	29508831
chr16	29512849	29513650
chr16	29679282	29681239
chr16	29699956	29700903
chr16	30057902	30060459
chr16	30221842	30222502
chr16	30736001	30737417
chr16	30768422	30769152
chr16	31177329	31178868
chr16	31293110	31294092
chr16	31334902	31336035
chr16	31351481	31352207
chr16	31379071	31380987
chr16	31397766	31398892
chr16	31453393	31453870
chr16	31688620	31690583
chr16	32367701	32368651
chr16	32840299	32841945
chr16	32841948	32843072
chr16	32844386	32844867
chr16	33257524	33259864
chr16	33818963	33819863
chr16	34234331	34235270
chr16	34350400	34351062
chr16	34472347	34472940
chr16	34491231	34491806
chr16	34661361	34662053
chr16	34844305	34844908
chr16	34904016	34907157
chr16	35262823	35264013
chr16	35273203	35273837
chr16	35404138	35404776
chr16	35439427	35441324
chr16	35556060	35556868
chr16	35559861	35560716
chr16	35670237	35670955
chr16	35851995	35852963
chr16	35872285	35872784
chr16	35942795	35943852
chr16	36491710	36493320
chr16	36505806	36506764
chr16	20711769	20712637
chr16	40762218	40763128
chr16	40923611	40924230
chr16	40974520	40979549
chr16	41238081	41238747
chr16	41314045	41315366
chr16	41521300	41522025
chr16	42128060	42128706
chr16	42178247	42178798
chr16	42180197	42180992
chr16	42202872	42203631
chr16	42215609	42217233
chr16	42251594	42252684
chr16	42253862	42255197
chr16	42276111	42277350
chr16	42278995	42280224
chr16	42496568	42497101
chr16	42518973	42520043
chr16	42569762	42571041
chr16	43089633	43090124
chr16	43355927	43358033
chr16	43420373	43422637
chr16	43423573	43424651
chr16	43866635	43868322
chr16	44407066	44407735
chr16	44559824	44560553
chr16	46243721	46246013
chr16	46246147	46248183
chr16	46249354	46250679
chr16	45576763	45577870
chr16	49318835	49319916
chr16	49074723	49076269
chr16	51458575	51459397
chr16	51642717	51644196
chr16	51874164	51874754
chr16	51875395	51876707
chr16	50462122	50463703
chr16	51923594	51924465
chr16	52676421	52677123
chr16	53064427	53066478
chr16	54591213	54592302
chr16	54618664	54620814
chr16	56168821	56169766
chr16	57580359	57582290
chr16	55061183	55062331
chr16	55008473	55011105
chr16	58389923	58394969
chr17	1058987	1059640
chr11	38439438	38439936
chr17	1536670	1538133
chr17	3132130	3133316
chr17	7442269	7442753
chr17	7540845	7541391
chr17	7560617	7563351
chr17	7802723	7803482
chr17	8166842	8167799
chr17	8176122	8176771
chr17	8241770	8242656
chr17	5408546	5410586
chr17	5739771	5740219
chr17	5786747	5787590
chr17	6984692	6987375
chr17	8366066	8367690
chr17	8364286	8364938
chr17	8449384	8449936
chr17	8474893	8476180
chr17	8882194	8882725
chr17	10231204	10231635
chr17	10216845	10217417
chr17	10082234	10083645
chr17	10071230	10074275
chr17	9997538	9998522
chr17	9988626	9990400
chr17	9977456	9978022
chr17	10836942	10837717
[truncated: 4,030 more rows]

## Sheet: Table_S25
DARs_24hpf_48hpf_Zv9
chr15	40712647	40713341
chr19	42532445	42533592
chr2	59652150	59653091
Zv9_NA479	35164	35811
chr7	29245463	29246594
chr7	76394479	76394867
chr8	1424252	1424792			]
chr9	45180503	45181046
chr7	72861844	72862846
chr16	55381354	55382273
chr15	6199814	6200665
chr15	6203767	6204868
chr15	6207191	6208521
chr15	6250307	6251182
chr23	38991049	38991499
chr16	52630130	52631423
chr14	48207940	48208516
chr3	13885378	13885673
Zv9_NA859	8623	9775
chr2	55055206	55055877
chr18	11171938	11172500
chr18	11174188	11175533
chr18	11183371	11183765
chr15	3173238	3175219
Zv9_NA348	1874	2280
chr10	12482243	12482852
chr7	44654115	44654949
chr15	3684087	3684937
chr14	3950358	3950765
chr4	23557012	23557295
chr24	1993420	1994154
chr10	4556350	4556935
chr8	3492798	3493161
chr17	42113527	42114643
chr17	41931427	41931947
chr17	41663114	41664276
chr11	24640665	24641096
Zv9_scaffold3551	147804	149555
chr9	52515160	52515714
chr2	25073406	25074016
chr2	25104352	25105242
chr11	1948737	1949915
Zv9_scaffold3529	205357	206694
Zv9_scaffold3529	16352	16866
Zv9_scaffold3563	243187	245023
chr16	10292601	10293169
chr17	36540458	36541167
chr14	29218290	29218650
chr12	2452241	2453496
chr1	1465621	1466422
chr1	5410312	5410955
chr1	10303422	10305626
chr1	12361803	12362364
chr1	16199970	16201542
chr1	16690045	16691215
chr1	19272111	19272633
chr1	20616854	20618754
chr1	28776547	28777374
chr1	22876651	22878023
chr1	22917574	22918283
chr1	26059924	26060799
chr1	34260177	34260627
chr1	35915015	35916473
chr1	35881025	35882228
chr1	35842076	35844302
chr1	35823800	35824720
chr1	40800975	40801594
chr1	40787409	40789008
chr1	40749918	40750548
chr1	40734576	40736162
chr1	40276774	40278137
chr1	40100103	40101533
chr1	39564445	39564933
chr1	39532907	39533905
chr1	47053263	47054544
chr17	10782763	10784876
chr1	51377505	51378730
chr1	51603343	51604134
chr1	53499866	53500588
chr1	55715835	55716643
chr1	55657790	55658768
chr1	56441311	56442182
chr1	57659586	57660335
chr10	134095	135777
chr10	7691554	7693017
chr10	16165300	16166360
chr10	9950056	9950767
chr10	9880919	9881474
chr10	18994152	18994983
chr10	22626551	22627428
chr10	21835882	21836578
chr10	21256399	21256931
chr10	20449948	20450484
chr10	27588284	27589126
chr10	27806779	27807373
chr10	23252431	23253000
chr10	23253656	23254297
chr10	23513761	23515145
chr10	24947102	24948772
chr10	24954117	24954624
chr10	24955722	24956622
chr10	24979358	24981180
chr10	29284798	29285385
chr10	34058110	34058805
chr10	34006862	34007981
chr10	36161055	36161573
chr10	36253944	36254508
chr10	36560778	36561507
chr10	36564917	36565699
chr10	37566424	37567075
chr10	38465331	38468586
chr10	39333807	39334770
chr10	39483787	39484703
chr17	9221003	9222537
chr10	45030801	45031668
chr10	45039191	45040409
chr11	1448239	1448919
chr11	3202911	3204057
chr11	3833047	3833985
chr11	8228620	8229324
chr11	8735012	8736089
chr11	8568952	8569808
chr11	19478996	19480797
chr11	24281200	24282504
chr11	23284434	23285011
chr11	25042112	25042928
chr11	25107031	25107778
chr11	25121918	25122705
chr11	25130838	25132481
chr11	26046278	26046839
chr11	26703246	26703671
chr11	27766337	27767128
chr11	28590085	28590976
chr11	28643804	28644481
chr11	29063962	29064475
chr11	30995681	30996814
chr11	30939066	30940637
chr11	30921358	30921950
chr11	32506557	32507876
chr11	39361546	39363094
chr11	41378286	41379088
chr11	42584773	42585370
chr11	42662926	42663503
chr11	46136314	46136871
chr12	261231	261841
chr12	5093459	5095474
chr12	6446877	6448417
chr12	7793017	7794007
chr12	12176377	12178154
chr12	19057519	19058108
chr12	18418898	18419370
chr12	18397275	18399436
chr12	17304112	17305222
chr12	29074519	29076252
chr12	28211346	28213098
chr12	26715407	26716437
chr12	23656159	23657235
chr12	24825546	24826391
chr12	26309354	26309824
chr12	26327082	26328637
chr12	33081923	33082951
chr12	35017574	35018286
chr12	36833607	36834460
chr12	36730912	36731981
chr12	36640899	36642345
chr12	36184815	36186040
chr12	39007810	39008301
chr12	44174372	44176271
chr12	44177029	44178481
chr12	44278752	44279547
chr12	44019192	44019783
chr12	44083532	44084247
chr13	35000658	35001211
chr13	3461803	3462382
chr13	5530327	5530842
chr13	6785248	6785848
chr13	7871808	7872555
chr13	8952197	8952761
chr13	10495267	10496107
chr13	11649120	11650363
chr13	11594674	11595795
chr13	12507060	12508670
chr13	17373968	17374921
chr13	17469327	17469790
chr13	21982449	21982994
chr13	24731376	24733211
chr13	26212901	26214756
chr13	26215589	26217302
chr13	26266166	26267859
chr13	26376880	26377727
chr13	26407078	26407697
chr13	26548960	26549476
chr13	26665842	26667292
chr13	26868309	26869354
chr13	26900590	26901674
chr13	27009561	27010072
chr13	30009966	30011965
chr13	30351568	30353101
chr13	30659202	30660802
chr13	30667178	30668363
chr13	30669319	30670583
chr13	30785371	30786408
chr13	30957507	30958354
chr13	28698343	28699395
chr13	28681952	28684762
chr13	28259294	28261726
chr13	34185746	34186321
chr13	34076210	34077693
chr13	38146449	38147691
chr13	41230159	41230679
chr13	43650911	43653618
chr13	43944029	43944590
chr13	44063986	44065809
chr13	50429709	50431105
chr13	50432844	50433984
chr14	334866	335567
chr14	94675	95217
chr14	2793892	2794477
chr14	4876694	4877968
chr14	6688794	6689374
chr14	8091617	8093332
chr14	8625100	8625889
chr14	11323343	11324308
chr14	12850301	12852272
chr14	18672306	18673435
chr14	18673505	18674582
chr14	18686834	18687652
chr14	21400515	21400995
chr14	21554163	21555204
chr14	21848296	21849478
chr14	23456911	23457554
chr14	26865818	26866374
chr14	26908253	26908994
chr14	27525125	27526208
chr14	28934051	28934781
chr14	28944056	28944768
chr14	31505672	31506719
chr14	31558935	31559475
chr14	31560941	31562222
chr14	32293822	32295300
chr14	32850236	32852052
chr14	33223308	33224703
chr14	33436038	33438037
chr14	33811448	33812106
chr14	33735389	33736138
chr14	35655972	35656775
chr14	37587886	37588464
chr14	37588568	37589187
chr14	38834337	38834861
chr14	40676098	40677211
chr14	40638439	40639685
chr14	42617713	42618286
chr14	43159201	43159690
chr15	4153873	4154682
chr15	4315791	4316607
chr15	13909808	13910613
chr15	13899123	13900419
chr15	20307852	20309734
chr15	20330272	20331272
chr15	20331778	20332589
chr15	20419108	20420724
chr15	22082188	22083288
chr15	22377877	22378876
chr15	22949161	22950564
chr15	27063545	27064544
chr15	27064621	27066973
chr15	27085291	27087209
chr15	27105100	27105894
chr15	27108882	27110153
chr15	27266688	27267893
chr15	27900765	27901354
chr15	28253055	28254213
chr15	28364872	28365846
chr15	29121097	29121605
chr15	29546821	29547461
chr15	29595594	29596338
chr15	29599641	29600205
chr15	30265973	30266417
chr15	31875998	31876735
chr15	32550765	32552303
chr15	32579779	32580336
chr15	32698499	32699020
chr15	38040023	38040761
chr15	45930281	45930911
chr16	921348	921883
chr16	567272	568074
chr16	1108947	1110425
chr16	1041758	1042234
chr16	5604938	5605925
chr16	9017679	9019423
chr16	9402609	9403311
chr16	9762142	9762672
chr16	12634082	12634788
chr16	12637443	12638943
chr16	12643413	12643922
chr16	12654260	12655889
chr16	12825048	12825792
chr16	13061769	13063227
chr16	17018155	17018581
chr16	19449563	19450709
chr16	25813083	25813655
chr16	25900270	25901515
chr16	26620075	26620781
chr16	26844092	26844618
chr16	26870161	26871786
chr16	27075474	27077100
chr16	27081184	27082171
chr16	27095752	27096751
chr16	27101885	27102853
chr16	27140785	27141514
chr16	27225994	27227614
chr16	27807035	27808084
chr16	27948213	27948884
chr16	28760482	28761018
chr16	31312718	31313701
chr16	31432054	31433781
chr16	31434044	31435358
chr16	31445890	31453282
chr16	31453393	31453870
chr16	31460968	31462081
chr16	31467713	31469495
chr16	31485124	31487411
chr16	32928813	32930282
chr16	32932021	32933088
chr16	33543198	33544348
chr16	33546867	33547689
chr16	35562417	35563330
chr16	35653579	35654284
chr16	35695603	35696216
chr16	35719047	35720244
chr16	35790232	35790981
chr16	35942795	35943852
chr16	40762218	40763128
chr16	43979405	43981281
chr16	44896270	44897132
chr16	49218610	49219512
chr16	51700887	51701469
chr16	50462122	50463703
chr16	53548483	53549626
chr16	54178046	54178568
chr17	8176122	8176771
chr17	7027546	7028272
chr17	8560448	8561309
chr17	8882194	8882725
chr17	10231204	10231635
chr17	9988626	9990400
chr17	11200738	11201316
chr17	10870016	10870534
chr17	11071074	11071678
chr17	11120101	11120671
chr17	11125554	11125959
chr17	11141094	11142921
chr17	11159238	11160010
chr17	12559090	12560022
chr17	15282819	15283432
chr17	17049763	17050642
chr17	17481579	17482043
chr17	20672492	20673259
chr17	18217822	18218545
chr17	18106122	18106801
chr17	17914444	17915125
chr17	22860817	22861592
chr17	23922394	23923226
chr17	24239824	24240374
chr17	24322941	24324022
chr17	24330308	24331034
chr17	24398512	24399290
chr17	26553830	26554940
chr17	26667146	26667858
chr17	27967662	27968711
chr17	28893137	28893631
chr17	28901412	28902161
chr17	30023366	30024083
chr17	30297186	30299049
chr17	31122107	31122589
chr17	27258736	27260083
chr17	27256940	27257710
chr17	27254064	27255680
chr17	33062869	33064779
chr17	34322950	34323513
chr17	35141064	35141840
chr17	37214618	37215153
chr17	43784858	43785412
chr17	44395310	44396655
chr17	44396738	44397294
chr17	46524979	46525831
chr17	50387862	50388622
chr17	52982256	52983255
chr17	53191011	53192070
chr18	1538099	1538709
chr18	2023941	2024468
chr18	5142551	5143103
chr18	5156393	5158622
chr18	5162042	5163224
chr18	5179344	5180792
chr18	8250479	8252303
chr18	10218575	10219769
chr18	11321309	11321896
chr18	17501316	17505121
chr18	17609796	17611126
chr18	18975854	18976831
chr18	19570703	19571293
chr18	19841535	19842061
chr18	20129057	20129804
chr18	20572960	20573726
chr18	20592756	20593471
chr18	22394216	22394911
chr18	22649014	22650066
chr18	23219179	23220716
chr18	25017196	25017865
chr18	26565057	26565704
chr18	27903716	27904312
chr18	27733895	27735072
chr18	27721546	27722868
chr18	24203324	24203944
chr18	37200022	37200583
chr18	41885214	41885676
chr18	44545883	44546843
chr18	44913226	44913748
chr18	45123398	45124187
chr18	47994112	47994948
chr19	1103896	1104417
chr19	1142071	1142733
chr19	1189789	1190337
chr19	3568504	3569270
chr19	4034126	4034929
Zv9_NA466	107957	108498
chr19	7033387	7034193
chr19	8651341	8652051
chr19	8692201	8692868
chr19	10003313	10004884
chr19	10009538	10010068
chr19	10024125	10025911
chr19	10083614	10084760
chr19	12102108	12103590
chr19	13216577	13218117
chr19	13179236	13180467
chr19	15709039	15709628
chr19	30752309	30754081
chr19	30762362	30762955
chr19	20140736	20141679
chr19	20580654	20582159
chr19	21881544	21882214
chr19	22200472	22202825
chr19	22605304	22606964
chr19	23620866	23621823
chr19	26359939	26361307
chr19	28788555	28790112
chr19	29366897	29367972
chr19	29413033	29414767
chr19	29485220	29486346
chr19	29972458	29973082
chr19	33604385	33604929
chr19	35076936	35077756
chr19	36349896	36350372
chr19	38768956	38769466
chr19	39460949	39461505
chr19	41227911	41229618
chr19	43902812	43903709
chr19	47593868	47594472
chr19	45519998	45520479
chr11	9701230	9701931
chr2	10535397	10536863
chr2	17130407	17130899
chr2	17705002	17705852
chr2	15310793	15311460
chr2	21573544	21574262
chr2	22476990	22477563
chr2	26441672	26442185
chr2	28175692	28176616
chr2	29157224	29157838
chr2	29633911	29634825
chr2	29740673	29741378
chr2	31039383	31041066
chr2	32673030	32674009
chr2	32679788	32680766
chr2	33082740	33083595
chr2	35116439	35117143
chr2	37048821	37050383
chr2	42844242	42845438
chr2	47646736	47648699
chr2	47564044	47564783
chr2	56843716	56844333
chr2	54629251	54630718
chr2	59949634	59951139
chr2	59946813	59947556
chr2	59956835	59957890
chr20	1583403	1584423
chr20	4772596	4773472
chr20	5011563	5012117
chr20	5024798	5026933
chr20	8603882	8605264
chr20	10739673	10740311
chr20	11174366	11174962
chr20	16992447	16993183
chr20	17543293	17543898
chr20	17828035	17829400
chr20	17892067	17893515
chr20	18562767	18563329
chr20	20655960	20657157
chr20	20753489	20754112
chr20	20905325	20907547
chr20	20932939	20933472
chr20	20958376	20959118
chr20	20962974	20964811
chr20	21279733	21280453
chr20	25250556	25251238
chr20	27552919	27553638
chr20	27972998	27973895
chr20	28463967	28465953
chr20	29968322	29970142
chr20	30172619	30173246
chr20	30228762	30229264
chr20	30269577	30270121
chr20	30298656	30300179
chr20	30333848	30335129
chr20	30455869	30456757
chr20	30805468	30806936
chr20	34266714	34267427
chr20	34419386	34421030
chr20	38638176	38639077
chr20	38926486	38927366
chr20	38959263	38959893
chr20	38994214	38995398
chr20	39000430	39001540
chr20	39034921	39035830
chr20	39906857	39907377
chr20	46444287	46444861
chr20	48893695	48894399
chr20	48904882	48905856
chr21	3576144	3576714
chr21	3569644	3570486
chr21	10842625	10843356
chr21	11069135	11069705
chr21	13893305	13894341
chr21	14395517	14396640
chr21	16147862	16148436
chr21	16334152	16335812
chr21	16555667	16556239
chr21	16824610	16826610
chr21	16851687	16852762
chr21	20928341	20929037
chr21	21653647	21655078
chr21	22733383	22733960
chr21	22789188	22789967
chr21	23089728	23090285
chr21	23568617	23569656
chr21	23884416	23885351
chr21	26253157	26253801
chr21	26469151	26470873
chr21	28227246	28228194
chr21	30498729	30499198
chr10	39419285	39420764
chr21	31640628	31641842
chr21	33346266	33346884
chr21	33812287	33813055
chr21	34495343	34496431
chr21	36208358	36209494
chr21	36785509	36787792
chr21	37261103	37262601
chr21	37365535	37366235
chr21	38944682	38945250
chr21	44015605	44016163
Zv9_scaffold3550	242082	242575
Zv9_NA735	171691	173903
chr22	12167680	12168478
chr22	10523151	10523721
chr22	11485578	11487184
chr22	14406543	14407068
chr22	16932052	16932933
chr22	17152055	17153361
chr22	17187897	17189528
chr22	17650627	17651341
chr22	18176960	18178157
chr22	18498265	18499652
chr22	18501363	18501930
chr22	18502027	18504553
chr22	18507909	18508572
chr22	18513261	18514298
chr22	18516422	18516979
chr22	18530082	18531328
chr22	18532401	18534145
chr22	20027978	20028627
chr22	21339374	21339960
chr22	21399286	21399926
chr22	21962887	21963613
chr22	23068576	23069680
chr22	25083271	25084346
chr22	25065832	25067853
chr22	25045117	25045654
chr22	23970729	23971465
chr22	27573889	27574873
chr22	35910584	35911701
chr22	35287085	35288075
chr22	39156738	39157339
chr22	40051067	40052714
chr23	2554921	2555852
chr23	3685037	3685602
chr23	5862137	5862848
chr23	8566514	8566941
chr23	9420836	9421581
chr23	10139146	10139861
chr23	12119783	12121671
chr23	13517421	13517980
chr23	17887703	17889246
chr23	17890900	17892542
chr23	17907160	17908225
chr23	18866589	18867649
chr23	21687693	21688259
chr23	22211490	22212711
chr23	23025879	23026973
chr23	23177992	23178892
chr23	23409478	23412200
chr23	23683732	23684491
chr23	25120240	25121523
chr23	28128936	28129444
chr23	28215606	28216734
chr23	28996359	28996889
chr23	30136081	30136916
chr23	30329869	30330264
chr23	30534602	30535195
chr23	30589834	30590301
chr23	31457020	31457675
chr23	32075459	32076346
chr23	32983625	32984780
chr23	36412571	36413211
chr23	35857049	35857857
chr23	38958103	38958923
chr23	37868091	37869187
chr23	39595111	39596076
chr23	38526910	38527618
chr23	42884979	42885880
chr23	43496252	43497363
chr24	2178727	2179395
chr24	3275133	3276742
chr24	4490263	4490864
chr24	4732938	4733777
chr24	6005889	6009188
chr24	6755950	6757252
chr24	10628775	10630142
chr24	11016206	11016898
chr24	13132880	13133874
chr24	14214126	14216147
chr24	14559099	14559681
chr18	2813605	2814324
chr24	17786649	17787388
chr24	21095208	21096310
chr24	21103994	21105060
chr24	23149031	23149558
chr24	24235460	24236057
chr24	24240549	24241105
chr24	24440023	24441291
chr24	24935095	24936342
chr24	31310901	31312060
chr24	31378797	31379946
chr24	31650982	31651686
chr24	34267853	34268549
chr24	37330254	37330756
chr25	276518	277081
chr25	771924	772806
chr25	8113826	8114322
chr25	7571121	7571773
chr17	27213731	27216207
chr25	8776624	8778592
chr25	8735877	8737273
chr25	13375414	13376070
chr25	13570436	13572131
chr25	13588729	13589753
chr25	17056505	17057613
chr25	16657732	16659073
chr25	18300877	18302094
chr25	20286109	20287243
chr25	22751556	22752348
chr25	23276339	23276932
chr25	24582313	24583283
chr25	29366412	29366988
chr25	31068727	31069934
chr2	58956954	58957430
chr25	32309059	32310728
chr25	36314204	36315025
chr3	640212	640810
chr3	7456589	7458267
chr3	12050667	12051632
chr3	12054586	12055012
chr2	30779163	30780083
chr3	12223926	12224933
chr3	12709076	12709831
chr3	15295827	15296385
chr3	15957078	15957561
chr3	17537142	17537779
chr3	17837635	17839595
chr3	17947597	17948423
chr3	19670596	19671407
chr3	22323875	22325175
chr3	22068155	22068730
chr3	23452833	23453837
chr3	27872618	27873264
chr3	28146306	28147537
chr3	28819112	28820716
chr3	30328761	30330185
chr3	30589829	30591819
chr3	30888140	30889618
chr3	30997434	30998082
chr3	31011914	31012815
chr3	33955388	33955915
chr3	34270835	34272501
chr3	34274281	34276072
chr3	34449269	34449887
chr3	34463717	34464548
chr3	34471539	34473187
chr3	34488369	34489515
chr3	34491497	34492047
chr3	34497858	34498610
chr3	34537797	34539490
chr3	35267298	35268964
chr3	35345048	35346136
chr3	35393576	35394537
chr3	35405145	35406012
chr3	35535252	35536431
chr3	35540209	35541899
chr3	35554271	35555600
chr3	40392109	40393876
chr3	41485432	41485988
chr3	44163141	44164804
chr3	43320795	43322161
chr3	47883096	47886942
chr3	48201588	48202049
chr3	47713169	47714744
chr3	53725159	53725932
chr3	54821008	54821546
chr3	60226757	60227389
chr3	11151194	11152034
chr3	62652438	62654526
chr4	284805	285368
Zv9_NA123	45678	46110
chr4	1725087	1725660
chr4	2426282	2427312
chr4	2655883	2656513
chr4	4254602	4255469
chr4	5829923	5830677
chr4	5586297	5586895
chr4	7460210	7461754
chr4	7582616	7583518
chr4	7658575	7659510
chr4	8648373	8649177
chr4	8799078	8799609
chr4	10532477	10533512
chr4	11217757	11218448
chr4	11763567	11764806
chr4	12011989	12013313
chr4	14790197	14790870
chr4	15566069	15566694
chr4	16300812	16301234
chr4	16498090	16499897
chr4	17730249	17732278
chr4	17741994	17744595
chr4	18063968	18065549
chr4	20283999	20285183
chr4	21386201	21387827
chr4	22351514	22352338
chr4	24973849	24974450
chr4	23758240	23759391
chr5	9432278	9434061
chr5	14256391	14257328
chr5	18940711	18941963
chr5	16429355	16429923
chr5	16408192	16408960
chr5	19770518	19771362
chr5	21453053	21453939
chr5	22158591	22159586
chr5	23807082	23807653
chr5	25144079	25145411
chr5	27197696	27199165
chr5	27207603	27208194
chr5	28029288	28030196
chr5	29110448	29111041
chr5	29737942	29739199
chr5	30227893	30229114
chr5	31032952	31033659
chr5	33189135	33189668
chr5	34171882	34173217
chr5	36147276	36148088
chr5	36336198	36337158
chr5	38127505	38128626
chr5	38064523	38065063
chr5	40167001	40168213
chr5	41368048	41370229
chr5	42452837	42453553
chr5	46468717	46470026
chr5	48025424	48028265
chr5	47497435	47498721
chr5	49777735	49780379
chr5	49798172	49800713
chr5	49903503	49904122
chr5	49908145	49908763
chr5	49912001	49912503
chr5	49912831	49914075
chr5	49919473	49921434
chr5	49926731	49928741
chr5	49934606	49937290
chr5	49942572	49944081
chr5	49961361	49961936
chr5	50790275	50790967
chr5	51267957	51269007
chr5	51745512	51746328
chr5	57746068	57748206
chr5	60436178	60437150
chr5	66975889	66976507
chr5	67481206	67482142
chr5	68868486	68869070
chr5	68942594	68943460
chr5	69565828	69566684
chr5	69579939	69580432
chr5	71601384	71601973
chr16	17814396	17816418
chr5	74904296	74904842
chr6	3195260	3195769
chr6	6464906	6466390
chr6	6468110	6470613
chr6	6475963	6477464
chr6	6478364	6479864
chr6	6516344	6517062
chr6	6529517	6530747
chr6	6539922	6540968
chr6	9629269	9630777
chr6	9612795	9613739
chr6	11774712	11779033
chr6	11827495	11828041
chr6	13169641	13171332
chr6	14417387	14417916
chr6	14411577	14413158
chr6	14396107	14396634
chr6	14181799	14183592
chr6	14745286	14746677
chr6	16300831	16301503
chr6	19093820	19094733
chr6	18041842	18044148
chr6	23743916	23745701
chr6	20629912	20630620
chr6	20913566	20914734
chr6	21118340	21119273
chr6	21158337	21159260
chr6	26673172	26673756
chr6	27592805	27593329
chr6	29075489	29076018
chr6	29673954	29675256
chr6	30198897	30199600
chr6	31614651	31615964
chr6	31841819	31842781
chr2	20170777	20171349
chr6	33544182	33545204
chr6	32814299	32814941
chr6	35298155	35298963
chr6	37515351	37515916
chr6	36905429	36907314
chr6	41490142	41490800
chr6	47957778	47958330
chr6	49288283	49289397
chr6	50661982	50662583
chr6	50459665	50460868
chr6	50450260	50451052
chr6	50395469	50396899
chr6	52920073	52920744
chr6	54543164	54543855
chr7	15691537	15692061
chr7	15182049	15183425
chr7	15199572	15200842
chr7	15211212	15212790
chr7	15224649	15227304
chr7	15228984	15230044
chr7	15233401	15234754
chr7	15243106	15244163
chr7	21227114	21227846
chr7	25138416	25138883
chr7	25323334	25324833
chr7	28431544	28432135
chr7	31815093	31815763
chr7	32037841	32038538
chr7	32175760	32176631
chr7	32161127	32163015
chr7	32544372	32544751
chr7	32878797	32879694
chr7	32880908	32881697
chr7	32916255	32917737
chr7	33020861	33021343
chr7	33444229	33445126
chr7	35175724	35177124
chr7	36376074	36377063
chr7	36691604	36692767
chr7	37031320	37032078
chr7	37797935	37798643
chr7	37871914	37872764
chr7	38241136	38242033
chr7	38326571	38327771
chr7	39343382	39344193
chr7	39715807	39716949
chr7	40377212	40377826
chr7	41863304	41863819
chr7	43230937	43231744
chr7	43839727	43840554
chr7	43674084	43676756
chr7	43655037	43656504
chr7	46852981	46853543
chr7	45347155	45347829
chr7	45304078	45305768
chr7	47670026	47671777
chr7	47749696	47750239
chr7	47754168	47755277
chr7	48054205	48055130
chr7	50045468	50046511
chr7	50435133	50435701
chr7	51010085	51011969
chr7	51117994	51118622
chr7	55807779	55809266
chr7	57155373	57156374
chr7	57376882	57377268
chr7	57526956	57527587
chr7	57620218	57621487
chr7	57846129	57847507
chr7	59337846	59338428
chr7	65260931	65261473
chr7	62790885	62791876
chr7	60805737	60806205
chr7	69871457	69872013
chr7	69872181	69872829
chr7	70920422	70921002
chr7	70910219	70911607
chr7	70882557	70883637
chr7	70824578	70826107
chr7	70030448	70032303
chr7	70044498	70045133
chr7	69473892	69474418
chr7	69474663	69475370
chr7	74116622	74118016
chr7	74173007	74174506
chr7	73413733	73414871
chr8	3191865	3193269
chr8	3165503	3166040
chr8	4513473	4514056
chr8	7927743	7928944
chr8	8697163	8698811
chr8	10025379	10026768
chr8	12139223	12139758
chr8	15533475	15535460
chr8	15670046	15670865
chr8	16666052	16666572
chr8	16722986	16723511
chr8	17538434	17539403
chr8	17540937	17541480
chr8	17761505	17762420
chr8	20597293	20598060
chr8	21080514	21081134
chr8	21224533	21225600
chr8	24096574	24098922
chr8	24152798	24153943
chr8	24161760	24162637
chr8	24187051	24188374
chr8	26985660	26986939
chr8	27371659	27372526
chr8	27637254	27637684
chr8	30909837	30910420
chr8	32152152	32153405
chr8	32191502	32192425
chr8	32457777	32458576
chr8	33616695	33617607
chr8	36593716	36594605
chr8	34650744	34651299
chr8	43606851	43608439
chr8	45523113	45524529
chr8	50494640	50495412
chr9	1115234	1115729
chr9	2548016	2548882
chr9	4747670	4748631
chr17	9306366	9306901
chr9	6850336	6851318
chr9	6597483	6598307
chr9	6628050	6628624
chr9	6697709	6698807
chr9	9573510	9575961
chr9	9931113	9931759
chr9	10496918	10497370
chr9	11255551	11256522
chr9	11563368	11563876
chr9	13303257	13304736
chr9	13390702	13391571
chr9	14479989	14480692
chr9	14691366	14691966
chr9	15034361	15035421
chr9	15135935	15136359
chr9	18915939	18916512
chr9	19369892	19371317
chr9	19374583	19375558
chr9	19383756	19384684
chr9	21384281	21384988
chr9	22706528	22707741
chr9	24243488	24244195
chr9	26349290	26350161
chr9	26427989	26429343
chr9	26510623	26511780
chr9	27037856	27039147
chr9	27086329	27087391
chr9	27688868	27690180
chr9	31739634	31741334
chr9	32029278	32030472
chr9	32353565	32354648
chr9	32459963	32460856
chr9	33184669	33185849
chr9	33819458	33820617
chr9	35678357	35679813
chr9	36082488	36083353
chr9	37426934	37428663
chr9	38305258	38306557
chr9	41171323	41171812
chr9	46373411	46374133
chr9	54376618	54377135
chr9	55986042	55986699
chr9 55986042 55986699
